# Supplementary material for: Semi-quantitative risk-based prioritisation scheme for chemicals of concern in the Nordic countries
Source: Royal Society of Chemistry journal article supplement (doi:10.1039/d3su00322a), 2024-01-01
Supplement: d3su00322a1.xlsx [file d3su00322a1.xlsx]

## Sheet: Scoring
Weighting list			Hazard			Quantities	Comparative values	Score		Exposure	Comparative values	Score			Comparative values
Corap	0.5		H410, H411, H413	1		0 - 0.000002	2e-06	1		4 - 6	6	1		The date was less than 10 years ago	2008-01-01	1
Sin-list	0.3		PBT	1		0.000002 - 0.0002	0.0002	2		6 - 8	8	2		The compound has been tested at less than 2 locations	2	1
Reach annex XVII	1		vPvB	1		0.0002 - 0.02	0.02	3		8 - 10	10	3		The compound has been tested during less than 1 year	1	1
Reach artikel 59	1		"Concluded to be PBT/vPvB"	1		0.02 - 2	2	4		10 - 12	12	4		Less than 2 matrices analysed?	2	1
Reach annex XIV	1		"Suspected PBT/vPVB"	0.7		2 - 200	200	5		12 - 14	14	5		The compound has been tested over 300 times	300	1
EDC update	0.3		"PBT cand list"	0.5		200 - 20 000	20000	6		14 - 16	16	6		The compound has been tested between 50 and 300 times	50	2
			"CMR"	3		20 000 -	>20000	7		16 - 18	18	7		The compound has been tested less than 50 times	50	3
			"Suspected CMR"	2.1		Intermediate use only		-40		Penalty		3.5		No data available		1.4
			C: H350-H351	1		Penalty		3.5		Weighting		1		Weighting		1
			C: "Carcinogenic"	1		Weighting		1
			C: "Suspected carcinogenic"	0.7
			M: H340-H341	1
			M: "Mutagenic"	1
			M: "Suspected mutagenic"	0.7
			R: H360-H361	1
			R: "Reproduction"	1
			R: "Reprotoxic"	1
			R: "Suspected reprotoxic"	0.7
			57f	1
			EDC - "Cat1"	1
			EDC - "Cat2"	0.5
			EDC - "Cat3b"	0.3
			EDC - "concluded to be, confirmed, categorised as"	1
			EDC - "potential endocrine disruptor"	0.5
			"Sensitiser"	0.6
			"Suspected sensitiser"	0.4
			"Other hazard based concern"	0.4
			Penalty	3.5
			Weighting	1
			Maximum score	8.6

## Sheet: Summary
CASNumber	EC Nummer i exponeringsfilen	EC Number	Name	SIN list	REACH Bilaga XVII	REACH Artikel 59	REACH Bilaga XIV	CoRAP list	EDC list	Reasons for inclusion on the SIN List	Hazard class and category code(s)	Sinlist Hazard statement code(s)	REACH bilaga XVII haz statement codes	Reach artikel 59 haz stat codes	Intrinsic property(ies) referred to in Article 57	Reach bilaga XIV haz stat codes	Corap haz stat codes	Initial grounds for concern	EDC category		PBT	vPvB	H410-413	CMR	Carcinogenic	Mutagenic	Reprotoxic	57f	EDC_cat	Other	Penalty	Total environment/health		Exposure	Total exposure points	Total Use (Quantities) SPIN	Quantities points (Total Use SPIN)		Score -latest date	Score - Number of years	Score - number of entries	Score - number of sites	Score - number of matrices	Total Monitoring		Weigthing- list	Total hazard with weighting	Quantities points (Total Use SPIN)	Total exposure points
26471-62-5	247-722-4	247-722-4	m-tolylidene diisocyanate	#N/A	#N/A	#N/A	#N/A	247-722-4	#REF!	#N/A	#N/A	#N/A	#N/A	#N/A	#N/A	#N/A	H351 H330 H335 H315 H319 H334 H317 H412	CMR#Suspected PBT/vPvB#Sensitiser#High (aggregated) tonnage#Wide dispersive use	#N/A		0.7	0.7	1	3	1	0	0	0	0	0.6	0	6		16	7	1392	6		1.4	1.4	1.4	1.4	1.4	7		0.5	3	6	7
2451-62-9	219-514-3	219-514-3	1,3,5-tris(oxiranylmethyl)-1,3,5-triazine-2,4,6(1H,3H,5H)-trione	219-514-3	#N/A	219-514-3	#N/A	219-514-3	#REF!	Classified CMR according to Annex VI of Regulation 1272/2008	Muta. 1B Acute Tox. 3 * Acute Tox. 3 * STOT RE 2 * Eye Dam. 1 Skin Sens. 1 Aquatic Chronic 3	H340 H331 H301 H373 ** H318 H317 H412	#N/A	H340 H331 H301 H373 ** H318 H317 H412	Mutagenic (Article 57b)	#N/A	H340 H331 H301 H373 ** H318 H317 H412	CMR#Suspected PBT/vPvB#Consumer use#Exposure of environment#Exposure of workers#Wide dispersive use	#N/A		0.7	0.7	1	3	0	1	0	0	0	0	0	5.4		12	5	49	5		1.4	1.4	1.4	1.4	1.4	7		1	5.4	5	5
96-69-5	202-525-2	202-525-2	6,6'-di-tert-butyl-4,4'-thiodi-m-cresol	#N/A	#N/A	#N/A	#N/A	202-525-2	#REF!	#N/A	#N/A	#N/A	#N/A	#N/A	#N/A	#N/A	#N/A	Suspected CMR#Potential endocrine disruptor#Suspected PBT/vPvB#Sensitiser#Consumer use#Wide dispersive use	#N/A		0.7	0.7	0	2.1	0	0	0	0	0.5	0.6	0	4.6		15	6	234.1	6		1.4	1.4	1.4	1.4	1.4	7		0.5	2.3	6	6
101-68-8	202-966-0	202-966-0	4,4’-Methylenediphenyl diisocyanate	#N/A	202-966-0	#N/A	#N/A	202-966-0	#REF!	#N/A	#N/A	#N/A	H351 H332 H335 H373 ** H315 H319 H334 H317	#N/A	#N/A	#N/A	H351 H332 H335 H373 ** H315 H319 H334 H317	CMR#Suspected PBT/vPvB#Sensitiser#Consumer use#Wide dispersive use	#N/A		0.7	0.7	0	3	1	0	0	0	0	0.6	0	5		17	7	3972.6	6		0	0	2	0	0	2		1	5	6	7
50-32-8	200-028-5	200-028-5	Benzo[def]chrysene	200-028-5	#N/A	200-028-5	#N/A	#N/A	#REF!	Classified CMR according to Annex VI of Regulation 1272/2008	Carc. 1B Muta. 1B Repr. 1B Skin Sens. 1 Aquatic Acute 1 Aquatic Chronic 1	H350 H340 H360FD H317 H400 H410	#N/A	H350 H340 H360FD H317 H400 H410	Carcinogenic (Article 57a)#Mutagenic (Article 57b)#Toxic for reproduction (Article 57c)#PBT (Article 57d)#vPvB (Article 57e)	#N/A	#N/A	#N/A	CAT1		1	1	1	3	1	1	1	0	1	0	0	7		14	6	2946.5	6		0	0	1	0	0	1		1	7	6	6
75980-60-8	278-355-8	278-355-8	Diphenyl(2,4,6-trimethylbenzoyl)phosphine oxide	#N/A	#N/A	#N/A	#N/A	278-355-8	#REF!	#N/A	#N/A	#N/A	#N/A	#N/A	#N/A	#N/A	H361f	Reprotoxic#Potential endocrine disruptor#Suspected PBT/vPvB#Sensitiser#Exposure of workers#Wide dispersive use	#N/A		0.7	0.7	0	0	0	0	1	0	0.5	0.6	0	3.5		14	6	38.8	5		1.4	1.4	1.4	1.4	1.4	7		0.5	1.75	5	6
56-55-3	200-280-6	200-280-6	Benz[a]anthracene	200-280-6	#N/A	200-280-6	#N/A	#N/A	#REF!	Classified CMR according to Annex VI of Regulation 1272/2008, identified as SVHC also due to vPvB properties	Carc. 1B Aquatic Acute 1 Aquatic Chronic 1	H350 H400 H410	#N/A	H350 H400 H410	Carcinogenic (Article 57a)#PBT (Article 57d)#vPvB (Article 57e)	#N/A	#N/A	#N/A	CAT2		1	1	1	3	1	0	0	0	0.5	0	0	6.5		8	3	3852.5	6									1	6.5	6	3
207-08-9	205-916-6	205-916-6	Benzo(k)fluoranthene	205-916-6	#N/A	205-916-6	#N/A	#N/A	#REF!	Classified CMR according to Annex VI of Regulation 1272/2008	Carc. 1B Aquatic Acute 1 Aquatic Chronic 1	H350 H400 H410	#N/A	H350 H400 H410	Carcinogenic (Article 57a)#PBT (Article 57d)#vPvB (Article 57e)	#N/A	#N/A	#N/A	#N/A		1	1	1	3	1	0	0	0	0	0	0	6		8	3	1004	6									1	6	6	3
98-29-3	202-653-9	202-653-9	4-tert-butylpyrocatechol	#N/A	#N/A	#N/A	#N/A	202-653-9	#REF!	#N/A	#N/A	#N/A	#N/A	#N/A	#N/A	#N/A	#N/A	Suspected Mutagenic#Potential endocrine disruptor#Suspected PBT/vPvB#Sensitiser#Exposure of environment#Exposure of workers	#N/A		0.7	0.7	0	0	0	0.7	0	0	0.5	0.6	0	3.2		15	6	4.6	5		1.4	1.4	1.4	1.4	1.4	7		0.5	1.6	5	6
628-96-6	211-063-0	211-063-0	Ethylene dinitrate	#N/A	#N/A	#N/A	#N/A	211-063-0	#REF!	#N/A	#N/A	#N/A	#N/A	#N/A	#N/A	#N/A	H200 H310 H330 H300 H373 **	Suspected Reprotoxic#Potential endocrine disruptor#Suspected PBT/vPvB#Suspected Sensitiser#High (aggregated) tonnage#Wide dispersive use	#N/A		0.7	0.7	0	0	0	0	0.7	0	0.5	0.4	0	3		12	5	2021.6	6		1.4	1.4	1.4	1.4	1.4	7		0.5	1.5	6	5
115-27-5	204-077-3	204-077-3	1,4,5,6,7,7-hexachloro-8,9,10-trinorborn-5-ene-2,3-dicarboxylic anhydride	204-077-3	#N/A	#N/A	#N/A	204-077-3	#REF!	This substance is Persistent, Mobile and Toxic.	STOT SE 3 _x000D_ Eye Irrit. 2 _x000D_ Skin Irrit. 2	H315 _x000D_ H319_x000D_ H315_x000D_ H319_x000D_ H335	#N/A	#N/A	#N/A	#N/A	H335 H315 H319	CMR#Suspected PBT/vPvB#Suspected Sensitiser#Exposure of environment#Exposure of workers	#N/A		0.7	0.7	0	3	0	0	0	0	0	0.4	0	4.8		12	5	5	5		1.4	1.4	1.4	1.4	1.4	7		0.5	2.4	5	5
2814-77-9	-	220-562-2	Pigment Red 4	#N/A	#N/A	#N/A	#N/A	220-562-2	#REF!	#N/A	#N/A	#N/A	#N/A	#N/A	#N/A	#N/A	H302; H313; H319; H413	Suspected Carcinogenic#Suspected Mutagenic#Suspected Reprotoxic#Suspected PBT/vPvB#Exposure of environment	#N/A		0.7	0.7	1	0	0.7	0.7	0.7	0	0	0	0	4.5		11	4	34.1	5		1.4	1.4	1.4	1.4	1.4	7		0.5	2.25	5	4
556-67-2	209-136-7	209-136-7	Octamethylcyclotetrasiloxane	209-136-7	#N/A	209-136-7	#N/A	#N/A	#REF!	Octamethylcyclotetrasiloxane is classified as a possible reprotoxic chemical (R3) and is categorized as an endocrine disruptor (cat 1). It is a potential PBT/ vPvB substance and has been detected in various environmental samples including biota and humans	Repr. 2 Aquatic Chronic 4	H361f *** H413	#N/A	H361f *** H413	PBT (Article 57d)#vPvB (Article 57e)	#N/A	#N/A	#N/A	CAT1		1	1	1	0	0	0	1	0	1	0	0	5		17	7	4.8	5		0	0	1	0	0	1		1	5	5	7
2425-85-6	-	219-372-2	Pigment Red 3	#N/A	#N/A	#N/A	#N/A	219-372-2	#REF!	#N/A	#N/A	#N/A	#N/A	#N/A	#N/A	#N/A	H400; H410; H413; H328; H335	Suspected Carcinogenic#Suspected Mutagenic#Suspected Reprotoxic#Suspected PBT/vPvB#Exposure of environment	#N/A		0.7	0.7	1	0	0.7	0.7	0.7	0	0	0	0	4.5		15	6	5.1	5		0	1	2	0	0	3		0.5	2.25	5	6
127-18-4	204-825-9	204-825-9	Perchloroethylene; tetrachloroethylene	204-825-9	#N/A	#N/A	#N/A	204-825-9	#REF!	Perchloroethylene is an endocrine disruptor affecting several body functions including reproduction, development, neurological function and kidneys. It is categorized as an endocrine disruptor in the EU Commission EDC database.	Carc. 2 Aquatic Chronic 2	H351 H411	#N/A	#N/A	#N/A	#N/A	H351 H411	CMR#Suspected PBT/vPvB#High (aggregated) tonnage#Wide dispersive use	CAT2		0.7	0.7	1	3	1	0	0	0	0.5	0	0	5.9		14	6	162.3	5		0	0	2	0	0	2		0.5	2.95	5	6
84852-15-3	284-325-5	284-325-5	4-nonylphenol, branched	284-325-5	#N/A	#N/A	#N/A	284-325-5	#REF!	Nonylphenol is an endocrine disruptor (cat 1) and is classified as possibly toxic for reproduction (R3), It is also persistent and bio-accumulative and it has been found in humans and the environment.	Skin Corr. 1B H314 Aquatic Acute 1 H400 Acute Tox. 4 H302 Repr. 2 H361fd Aquatic Chronic 1 H410	#N/A	#N/A	#N/A	#N/A	#N/A	H361fd H302 H314 H400 H410	Suspected PBT/vPvB#Consumer use#High (aggregated) tonnage#Wide dispersive use	#N/A		0.7	0.7	1	0	0	0	1	0	0	0	0	3.4		16	7	739.1	6		0	0	1	0	0	1		0.5	1.7	6	7
118-82-1	204-279-1	204-279-1	2,2′,6,6′-Tetra-tert-butyl-4,4′- methylenediphenol	#N/A	#N/A	#N/A	#N/A	204-279-1	#REF!	#N/A	#N/A	#N/A	#N/A	#N/A	#N/A	#N/A	#N/A	Suspected CMR#Potential endocrine disruptor#Suspected PBT/vPvB#Suspected Sensitiser#Consumer use#Exposure of environment#Exposure of workers#Wide dispersive use	#N/A		0.7	0.7	0	2.1	0	0	0	0	0.5	0.4	0	4.4		14	6	3.7	5		0	0	1	0	0	1		0.5	2.2	5	6
79-94-7	201-236-9	201-236-9	Tetrabromobisphenol A (TBBPA)	201-236-9	#N/A	#N/A	#N/A	201-236-9	#REF!	For Tonalide (AHTN) endocrine effects have been reported. It is potentially persistent and bioaccumulative. It has been frequently found in humans and the environment.	Aquatic Acute 1 Aquatic Chronic 1	H400 H410	#N/A	#N/A	#N/A	#N/A	H400 H410	Suspected Reprotoxic#Potential endocrine disruptor#Suspected PBT/vPvB#Consumer use#Exposure of environment#Exposure of workers#High (aggregated) tonnage#Wide dispersive use	#N/A		0.7	0.7	1	0	0	0	0.7	0	0.5	0	0	3.6		12	5	37	5		0	0	2	0	0	2		0.5	1.8	5	5
3380-34-5	222-182-2	222-182-2	Triclosan	222-182-2	#N/A	#N/A	#N/A	222-182-2	#REF!	Triclosan is very toxic to aquatic life and endocrine disrupting effects have been reported. It is potentially bioaccumulative and has been widely found in both humans and the environment.	Eye Irrit. 2 Skin Irrit. 2 Aquatic Acute 1 Aquatic Chronic 1	H319 H315 H400 H410	#N/A	#N/A	#N/A	#N/A	H315 H319 H400 H410	Potential endocrine disruptor#Suspected PBT/vPvB#High (aggregated) tonnage	#N/A		0.7	0.7	1	0	0	0	0	0	1	0	0	3.4		12	5	0.5	4		0	0	1	0	0	1		0.5	1.7	4	5
81-15-2	201-329-4	201-329-4	Musk Xylene	201-329-4	#N/A	201-329-4	201-329-4	#N/A	#REF!	Substance is concluded to be PBT by European Chemicals Bureau PBT Working Group.	Expl. 1.1 Carc. 2 Aquatic Acute 1 Aquatic Chronic 1	H201 H351 H400 H410	#N/A	H201 H351 H400 H410	vPvB (Article 57e)	H201 H351 H400 H410	#N/A	#N/A	#N/A		1	1	1	0	1	0	0	0	0	0	0	4		13	5	Confidential	3.5		0	1	1	0	0	2		1	4	3.5	5
110-88-3	203-812-5	203-812-5	1,3,5-trioxane	#N/A	#N/A	#N/A	#N/A	203-812-5	#REF!	#N/A	#N/A	#N/A	#N/A	#N/A	#N/A	#N/A	H228 H361d *** H335	Suspected CMR#Suspected PBT/vPvB#Suspected Sensitiser#Exposure of environment#High (aggregated) tonnage#Wide dispersive use	#N/A		0.7	0.7	0	2.1	0	0	1	0	0	0.4	0	3.9		12	5	Confidential	3.5		1.4	1.4	1.4	1.4	1.4	7		0.5	1.95	3.5	5
218-01-9	205-923-4	205-923-4	Chrysene	205-923-4	#N/A	205-923-4	#N/A	#N/A	#REF!	Classified CMR according to Annex VI of Regulation 1272/2008, identified as PBT for the REACH Candidate List	Carc. 1B Muta. 2 Aquatic Acute 1 Aquatic Chronic 1	H350 H341 H400 H410	#N/A	H350 H341 H400 H410	Carcinogenic (Article 57a)#PBT (Article 57d)#vPvB (Article 57e)	#N/A	#N/A	#N/A	#N/A		1	1	1	3	1	1	0	0	0	0	0	6		12	5	Confidential	3.5		0	0	1	0	0	1		1	6	3.5	5
693-21-0	211-745-8	211-745-8	Oxydiethylene dinitrate	#N/A	#N/A	#N/A	#N/A	211-745-8	#REF!	#N/A	#N/A	#N/A	#N/A	#N/A	#N/A	#N/A	H310 H330 H300 H373 ** H412 H200	Suspected Carcinogenic#Suspected Reprotoxic#Potential endocrine disruptor#Suspected PBT/vPvB#High RCR	#N/A		0.7	0.7	1	0	0.7	0	0.7	0	0.5	0	0	4.3		11	4	Confidential	3.5		1.4	1.4	1.4	1.4	1.4	7		0.5	2.15	3.5	4
4979-32-2	225-625-8	225-625-8	N,N-dicyclohexylbenzothiazole-2-sulphenamide	#N/A	#N/A	#N/A	#N/A	225-625-8	#REF!	#N/A	#N/A	#N/A	#N/A	#N/A	#N/A	#N/A	#N/A	Suspected CMR#Suspected PBT/vPvB#Sensitiser#Consumer use#Exposure of workers#Wide dispersive use	#N/A		0.7	0.7	0	2.1	0	0	0	0	0	0.6	0	4.1		10	4	Confidential	3.5		0	0	2	0	0	2		0.5	2.05	3.5	4
191-24-2	205-883-8	205-883-8	Benzo[ghi]perylene	205-883-8	#N/A	205-883-8	#N/A	#N/A	#REF!	Substance is concluded to be a Reprotoxic substance and PBT and vPvB SVHC by ECHA Member State Committee.	0	#N/A	#N/A	#N/A	PBT (Article 57d)#vPvB (Article 57e)	#N/A	#N/A	#N/A	#N/A		1	1	0	0	0	0	1	0	0	0	0	3		10	4	Confidential	3.5		0	0	1	0	0	1		1	3	3.5	4
-	448-020-2	448-020-2	mixture of two components: 1. N-(1,3- dimethylbutyl)-N´- phenyl-p-phenylenediamine 2. N1-(1,3-dimethylbutyl)- N4-(4-(1-methyl-1- phenylethyl)phenyl)ben zene-1,4-diamine	#N/A	#N/A	#N/A	#N/A	448-020-2	#REF!	#N/A	#N/A	#N/A	#N/A	#N/A	#N/A	#N/A	#N/A	CMR#Suspected PBT/vPvB#High RCR	#N/A		0.7	0.7	0	3	0	0	0	0	0	0	0	4.4		#N/A	3.5	#N/A	3.5									0.5	2.2	3.5	3.5
32536-52-0	251-087-9	251-087-9	Diphenyl ether, octabromo derivative	251-087-9	#N/A	#N/A	#N/A	#N/A	#REF!	Substance is concluded to be PBT by European Chemicals Bureau PBT Working Group; Classified CMR according to Annex VI of Regulation 1272/2008	Repr. 1B	H360Df	#N/A	#N/A	#N/A	#N/A	#N/A	#N/A	#N/A		1	0	0	3	0	0	1	0	0	0	0	4		No data	3.5	No data	3.5									0.3	1.2	3.5	3.5
3830-45-3	-	-	Decanoic acid, nonadecafluoro-, sodium salt	3830-45-3	#N/A	3830-45-3	#N/A	#N/A	#N/A	Substance is concluded to be a Reprotoxic substance and PBT SVHC by ECHA Member State Committee.	Official classification missing - Candidate list Reprotoxic and PBT substance by ECHA Member State Committee.	#N/A	#N/A	H351 H360Df H362	Toxic for reproduction (Article 57c)#PBT (Article 57d)	#N/A	#N/A	#N/A	#N/A		1	0	0	0	1	0	1	0	0	0	0	3		No data	3.5	No data	3.5									1	3	3.5	3.5
335-76-2	206-400-3	206-400-3	Nonadecafluorodecanoic acid (PFDA)	206-400-3	#N/A	206-400-3	#N/A	#N/A	#REF!	Substance is concluded to be a Reprotoxic substance SVHC by ECHA Member State Committee.	Official classification missing - Candidate list Toxic for Reproduction and PBT substance by ECHA Member State Committee.	#N/A	#N/A	H351 H360Df H362	Toxic for reproduction (Article 57c)#PBT (Article 57d)	#N/A	#N/A	#N/A	#N/A		1	0	0	0	1	0	1	0	0	0	0	3		No data	3.5	No data	3.5									1	3	3.5	3.5
375-95-1	206-801-3	206-801-3	PFNA	206-801-3	#N/A	206-801-3	#N/A	#N/A	#REF!	This substance has persistent, bioackumulative and toxic properties.has been detected in human blood, in dolphins, seals and polar bears. Substance is concluded to be PBT and Reprotoxic substance SVHC by ECHA Member State Committee.	PBT and Reprotoxic substance, Candidate List.	#N/A	#N/A	H351 H360Df H362 H332 H302 H372 H318	Toxic for reproduction (Article 57c)#PBT (Article 57d)	#N/A	#N/A	#N/A	#N/A		1	0	0	0	1	0	1	0	0	0	0	3		No data	3.5	No data	3.5									1	3	3.5	3.5
3108-42-7	221-470-5	221-470-5	Nonadecafluorodecanoic acid (PFDA) and its ammonium salts	221-470-5	#N/A	221-470-5	#N/A	#N/A	#REF!	Substance is concluded to be a Reprotoxic substance and PBT SVHC by ECHA Member State Committee.	Official classification missing - Candidate list Toxic for Reproduction and PBT substance by ECHA Member State Committee.	#N/A	#N/A	H351 H360Df H362	Toxic for reproduction (Article 57c)#PBT (Article 57d)	#N/A	#N/A	#N/A	#N/A		1	0	0	0	1	0	1	0	0	0	0	3		No data	3.5	No data	3.5									1	3	3.5	3.5
118-79-6	204-278-6	204-278-6	2,4,6-tribromophenol	204-278-6	#N/A	#N/A	#N/A	204-278-6	#REF!	This substance has endocrine disrupting properties. In vitro studies have shown binding to a thyroid hormone transport protein. Animal studies have shown the substance to alter the rate of development and increase abnormalities. In addition it interferes	Official classification missing	#N/A	#N/A	#N/A	#N/A	#N/A	#N/A	CMR#Suspected PBT/vPvB#High (aggregated) tonnage#High RCR#Wide dispersive use	#N/A		0.7	0.7	0	3	0	0	0	0	1	0	0	5.4		No data	3.5	Confidential	3.5									0.5	2.7	3.5	3.5
91-97-4	202-112-7	202-112-7	3,3'-dimethylbiphenyl-4,4'-diyl diisocyanate	#N/A	#N/A	#N/A	#N/A	202-112-7	#REF!	#N/A	#N/A	#N/A	#N/A	#N/A	#N/A	#N/A	#N/A	Suspected CMR#Suspected PBT/vPvB#Sensitiser#Consumer use	#N/A		0.7	0.7	0	2.1	0	0	0	0	0	0.6	0	4.1		No data	3.5	No data	3.5									0.5	2.05	3.5	3.5
2312-35-8	219-006-1	219-006-1	Propargite	#N/A	#N/A	#N/A	#N/A	219-006-1	#REF!	#N/A	#N/A	#N/A	#N/A	#N/A	#N/A	#N/A	H351 H331 H315 H318 H400 H410	Potential endocrine disruptor#Suspected PBT/vPvB	#N/A		0.7	0.7	1	0	1	0	0	0	0.5	0	0	3.9		No data	3.5	No data	3.5									0.5	1.95	3.5	3.5
13595-25-0	428-970-4	428-970-4	4,4'-(1,3-phenylene-bis(1-methylethylidene))bisphenol	#N/A	#N/A	#N/A	#N/A	428-970-4	#REF!	#N/A	#N/A	#N/A	#N/A	#N/A	#N/A	#N/A	H361f *** H317 H411	Suspected PBT/vPvB#Other hazard based concern#Consumer use#Exposure of environment	#N/A		0.7	0.7	1	0	0	0	1	0	0	0.4	0	3.8		No data	3.5	No data	3.5									0.5	1.9	3.5	3.5
3825-26-1	223-320-4	223-320-4	Perfluorooctanoic acid (PFOA)ammonium salt	223-320-4	#N/A	223-320-4	#N/A	#N/A	#REF!	Classified CMR according to Annex VI of Regulation 1272/2008	Carc. 2 Repr. 1B Lact. Acute Tox. 4 Acute Tox. 4 STOT RE 1 Eye Dam.1	H351 H360D H362 H332 H302 H372 (liver) H318	#N/A	H351 H360D H362 H332 H302 H372 H318	Toxic for reproduction (Article 57c)#PBT (Article 57d)	#N/A	#N/A	#N/A	#N/A		1	0	0	3	1	0	1	0	0	0	0	4		8	3	Confidential	3.5									1	4	3.5	3
335-67-1	206-397-9	206-397-9	Perfluorooctanoic acid (PFOA)	206-397-9	206-397-9	206-397-9	#N/A	#N/A	#REF!	For PFOA carcinogenic and reprotoxic effects have been reported. It is persistent and is ubiquitously found in the environment and in humans.	Carc. 2_x000D_ Repr. 1B_x000D_ Lact._x000D_ Acute Tox. 4_x000D_ Acute Tox. 4_x000D_ STOT RE 1_x000D_ Eye Dam. 1	H351_x000D_ H360D_x000D_ H362_x000D_ H332_x000D_ H302_x000D_ H372 (liver)_x000D_ H318	H351 H360D H362 H332 H302 H372 H318	H351 H360D H362 H332 H302 H372 H318	Toxic for reproduction (Article 57c)#PBT (Article 57d)	#N/A	#N/A	#N/A	#N/A		1	0	0	0	1	0	1	0	0	0	0	3		8	3	Confidential	3.5									1	3	3.5	3
24748-23-0	-	429-320-2	3,6,9-TRIETHYL-3,6,9-TRIMETHYL-1,4,7-TRIPEROXYNONANE	#N/A	#N/A	#N/A	#N/A	429-320-2	#REF!	#N/A	#N/A	#N/A	#N/A	#N/A	#N/A	#N/A	H410; H411; H302; H311; H331; H335; H330	PBT/vPvB	#N/A		1	1	1	0	0	0	0	0	0	0	0	3		8	3	Confidential	3.5									0.5	1.5	3.5	3
65996-93-2	266-028-2	266-028-2	Pitch, coal tar, high-temp.	266-028-2	#N/A	266-028-2	266-028-2	#N/A	#REF!	Classified CMR according to Annex VI of Regulation 1272/2008	Carc. 1A Muta. 1B Repr. 1B Aquatic Acute 1 Aquatic Chronic 1	H350 H340 H360FD H400 H410	#N/A	H350 H340 H360FD H400 H410	Carcinogenic (Article 57a)#PBT (Article 57d)#vPvB (Article 57e)	H350 H340 H360FD H400 H410	#N/A	#N/A	#N/A		1	1	1	3	1	1	1	0	0	0	0	6		#N/A	3.5	UVCB, mixture, intermediate	-40									1	6	-40	3.5
85535-84-8	287-476-5	287-476-5	Alkanes, C10-13, chloro, SCCP	287-476-5	#N/A	287-476-5	#N/A	#N/A	#REF!	Substance is concluded to be PBT by European Chemicals Bureau PBT Working Group.	Carc. 2 Aquatic Acute 1 Aquatic Chronic 1	H351 H400 H410	#N/A	H351 H400 H410	PBT (Article 57d)#vPvB (Article 57e)	#N/A	#N/A	#N/A	CAT1		1	1	1	0	1	0	0	0	1	0	0	5		#N/A	3.5	UVCB, mixture, intermediate	-40									1	5	-40	3.5
134237-50-6	-	-	alpha-hexabromocyclododecane	134237-50-6	#N/A	134237-50-6	134237-50-6	#N/A	#N/A	Substance is concluded to be PBT by European Chemicals Bureau PBT Working Group.	PBT Cand list	PBT Cand list	#N/A	#N/A	PBT (Article 57d)	H361 H362	#N/A	#N/A	#N/A		1	0	0	0	0	0	1	0	0	0	0	2														1	2
134237-51-7	-	-	beta-hexabromocyclododecane	134237-51-7	#N/A	134237-51-7	134237-51-7	#N/A	#N/A	Substance is concluded to be PBT by European Chemicals Bureau PBT Working Group.	PBT Cand list	PBT Cand list	#N/A	#N/A	PBT (Article 57d)	H361 H362	#N/A	#N/A	#N/A		1	0	0	0	0	0	1	0	0	0	0	2														1	2
134237-52-8	-	-	gamma-hexabromocyclododecane	134237-52-8	#N/A	134237-52-8	134237-52-8	#N/A	#N/A	Substance is concluded to be PBT by European Chemicals Bureau PBT Working Group.	PBT Cand list	PBT Cand list	#N/A	#N/A	PBT (Article 57d)	H361 H362	#N/A	#N/A	#N/A		1	0	0	0	0	0	1	0	0	0	0	2														1	2
21049-39-8	-	-	Sodium salts of perfluorononan-1-oic-acid	21049-39-8	#N/A	#N/A	#N/A	#N/A	#N/A	Substance is concluded to be PBT and Reprotoxic substance SVHC by ECHA Member State Committee.	PBT and Reprotoxic substance, Candidate List.	#N/A	#N/A	#N/A	#N/A	#N/A	#N/A	#N/A	#N/A		1	0	0	0	0	0	1	0	0	0	0	2														0.3	0.6
21049-39-8	-	-	Sodium salts of perfluorononan-1-oic-acid Sodium salts of perfluorononan-1-oic-acid Sodium salts of perfluorononan-1-oic-acid	21049-39-8	#N/A	#N/A	#N/A	#N/A	#N/A	Substance is concluded to be PBT and Reprotoxic substance SVHC by ECHA Member State Committee.	PBT and Reprotoxic substance, Candidate List.	#N/A	#N/A	#N/A	#N/A	#N/A	#N/A	#N/A	#N/A		1	0	0	0	0	0	1	0	0	0	0	2														0.3	0.6
4149-60-4	-	-	Ammonium salts of perfluorononan-1-oic-acid	4149-60-4	#N/A	#N/A	#N/A	#N/A	#N/A	Substance is concluded to be PBT and Reprotoxic substance SVHC by ECHA Member State Committee.	PBT and Reprotoxic substance, Candidate List.	#N/A	#N/A	#N/A	#N/A	#N/A	#N/A	#N/A	#N/A		1	0	0	0	0	0	1	0	0	0	0	2														0.3	0.6
4149-60-4	-	-	Ammonium salts of perfluorononan-1-oic-acid	4149-60-4	#N/A	#N/A	#N/A	#N/A	#N/A	Substance is concluded to be PBT and Reprotoxic substance SVHC by ECHA Member State Committee.	PBT and Reprotoxic substance, Candidate List.	#N/A	#N/A	#N/A	#N/A	#N/A	#N/A	#N/A	#N/A		1	0	0	0	0	0	1	0	0	0	0	2														0.3	0.6
120-82-1	204-428-0	204-428-0	1,2,4-trichlorobenzene	204-428-0	204-428-0	#N/A	#N/A	#N/A	#REF!	Substance is concluded to be PBT by European Chemicals Bureau PBT Working Group.	Acute Tox. 4 * Skin Irrit. 2 Aquatic Acute 1 Aquatic Chronic 1	H302 H315 H400 H410	H302 H315 H400 H410	#N/A	#N/A	#N/A	#N/A	#N/A	#N/A		1	0	1	0	0	0	0	0	0	0	0	2														1	2
129-00-0	-	204-927-3	Pyrene	#N/A	#N/A	204-927-3	#N/A	#N/A	#REF!	#N/A	#N/A	#N/A	#N/A	#N/A	PBT (Article 57d)#vPvB (Article 57e)	#N/A	#N/A	#N/A	#N/A		1	1	0	0	0	0	0	0	0	0	0	2														1	2
206-44-0	-	205-912-4	Fluoranthene	#N/A	#N/A	205-912-4	#N/A	#N/A	#REF!	#N/A	#N/A	#N/A	#N/A	#N/A	PBT (Article 57d)#vPvB (Article 57e)	#N/A	#N/A	#N/A	#N/A		1	1	0	0	0	0	0	0	0	0	0	2														1	2
294-62-2	206-033-9	206-033-9	Cyclododecane	206-033-9	#N/A	#N/A	#N/A	#N/A	#REF!	Substance is concluded to be both PBT and vPvB by European Chemicals Bureau PBT Working Group.	PBT	PBT	#N/A	#N/A	#N/A	#N/A	#N/A	#N/A	#N/A		1	1	0	0	0	0	0	0	0	0	0	2														0.3	0.6
540-97-6	208-762-8	208-762-8	Dodecamethylcyclohexasiloxane	208-762-8	#N/A	208-762-8	#N/A	#N/A	#REF!	Substance is concluded to be a PBT and vPvB SVHC by ECHA Member State Committee.	0	#N/A	#N/A	#N/A	PBT (Article 57d)#vPvB (Article 57e)	#N/A	#N/A	#N/A	#N/A		1	1	0	0	0	0	0	0	0	0	0	2														1	2
541-02-6	208-764-9	208-764-9	Decamethylcyclopentasiloxane	208-764-9	#N/A	208-764-9	#N/A	#N/A	#REF!	Substance is concluded to be a PBT and vPvB SVHC by ECHA Member State Committee.	0	#N/A	#N/A	#N/A	PBT (Article 57d)#vPvB (Article 57e)	#N/A	#N/A	#N/A	#N/A		1	1	0	0	0	0	0	0	0	0	0	2														1	2
1163-19-5	214-604-9	214-604-9	Deca-BDE	214-604-9	214-604-9	214-604-9	#N/A	#N/A	#REF!	DecaBDE has been reported to have developmentally toxic and endocrine disruptive effects. It is persistent but has been shown to have the potential to degrade to compounds with PBT/vPvB properties. Deca BDE is commonly found in humans and the environmen	PBT cand list.	PBT cand list.	#N/A	#N/A	PBT (Article 57d)#vPvB (Article 57e)	#N/A	#N/A	#N/A	#N/A		1	1	0	0	0	0	0	0	0	0	0	2														1	2
3194-55-6	221-695-9	221-695-9	Hexabromocyclododecane	221-695-9	#N/A	221-695-9	221-695-9	#N/A	#REF!	Substance is concluded to be PBT by European Chemicals Bureau PBT Working Group.	PBT Cand list	PBT Cand list	#N/A	H361 H362	PBT (Article 57d)	H361 H362	#N/A	#N/A	#N/A		1	0	0	0	0	0	1	0	0	0	0	2														1	2
3846-71-7	223-346-6	223-346-6	UV-320	223-346-6	#N/A	223-346-6	223-346-6	#N/A	#REF!	Substance is concluded to be PBT and vPvB SVHC by ECHA Member State Committee.	PBT and vPvB cand list.	#N/A	#N/A	#N/A	PBT (Article 57d)#vPvB (Article 57e)	#N/A	#N/A	#N/A	#N/A		1	1	0	0	0	0	0	0	0	0	0	2														1	2
13560-89-9	-	236-948-9	1,6,7,8,9,14,15,16,17,17,18,18-dodecachloropentacyclo[12.2.1.16,9.02,13.05,10]octadeca-7,15-diene	236-948-9	#N/A	236-948-9	#N/A	#N/A	#REF!	Identified as vPvB for the REACH Candidate List. This substance has persistent, bioackumulative and toxic properties.It has been detected in environmental and human samples and estimated and experimental data show P, B and T properties.	Official classification missing	#N/A	#N/A	#N/A	vPvB (Article 57e)	#N/A	#N/A	#N/A	#N/A		1	1	0	0	0	0	0	0	0	0	0	2														1	2
13560-89-9/135821-74-8;135821-03-3	236-948-9	236-948-9	Dechlorane plus	236-948-9	#N/A	236-948-9	#N/A	#N/A	#REF!	Identified as vPvB for the REACH Candidate List. This substance has persistent, bioackumulative and toxic properties.It has been detected in environmental and human samples and estimated and experimental data show P, B and T properties.	Official classification missing	#N/A	#N/A	#N/A	vPvB (Article 57e)	#N/A	#N/A	#N/A	#N/A		1	1	0	0	0	0	0	0	0	0	0	2														1	2
25637-99-4	247-148-4	247-148-4	Hexabromocyclododecane	247-148-4	#N/A	247-148-4	247-148-4	#N/A	#REF!	Substance is concluded to be PBT by European Chemicals Bureau PBT Working Group.	PBT Cand list	PBT Cand list	#N/A	H361 H362	PBT (Article 57d)	H361 H362	#N/A	#N/A	#N/A		1	0	0	0	0	0	1	0	0	0	0	2														1	2
25973-55-1	247-384-8	247-384-8	UV-328	247-384-8	#N/A	247-384-8	247-384-8	#N/A	#REF!	This substance has persistent, bioackumulative and toxic properties. It has been found in a variety of environmental samples and in different marine organisms. Estimated and experimental data show PBT properties.	Official classification missing	#N/A	#N/A	#N/A	PBT (Article 57d)#vPvB (Article 57e)	#N/A	#N/A	#N/A	#N/A		1	1	0	0	0	0	0	0	0	0	0	2														1	2
87-61-6	201-757-1	201-757-1	1,2,3-trichlorobenzene	201-757-1	#N/A	#N/A	#N/A	#N/A	#REF!	Substance is concluded to be PBT by European Chemicals Bureau PBT Working Group.	PBT	PBT	#N/A	#N/A	#N/A	#N/A	#N/A	#N/A	#N/A		1	0	0	0	0	0	0	0	0	0	0	1														0.3	0.3
87-68-3	201-765-5	201-765-5	Hexachlorobuta-1,3-diene	201-765-5	#N/A	#N/A	#N/A	#N/A	#REF!	Substance is concluded to be PBT & vPvB by European Chemicals Bureau PBT Working Group.	PBT	PBT	#N/A	#N/A	#N/A	#N/A	#N/A	#N/A	#N/A		1	0	0	0	0	0	0	0	0	0	0	1														0.3	0.3
120-12-7	204-371-1	204-371-1	Anthracene	204-371-1	#N/A	204-371-1	#N/A	#N/A	#REF!	Substance is concluded to be PBT by European Chemicals Bureau PBT Working Group.	PBT	PBT	#N/A	#N/A	PBT (Article 57d)	#N/A	#N/A	#N/A	#N/A		1	0	0	0	0	0	0	0	0	0	0	1														1	1
133-49-3	205-107-8	205-107-8	Pentachlorobenzenethiol	205-107-8	#N/A	#N/A	#N/A	#N/A	#REF!	Substance is concluded to be PBT & vPvB by European Chemicals Bureau PBT Working Group.	PBT	PBT	#N/A	#N/A	#N/A	#N/A	#N/A	#N/A	#N/A		1	0	0	0	0	0	0	0	0	0	0	1														0.3	0.3
335-77-3/67906-42-7	267-709-7	206-401-9 / 267-709-7	PFDS	206-401-9 / 267-709-7	#N/A	#N/A	#N/A	#N/A	#REF!	This substance has persistent, bioackumulative and toxic properties.It has been found in mammals, fish, bivalves and crustaceans. Both empirical and modelled data show PBT properties of this substance.	Official classification missing	#N/A	#N/A	#N/A	#N/A	#N/A	#N/A	#N/A	#N/A		1	0	0	0	0	0	0	0	0	0	0	1														0.3	0.3
355-46-4	206-587-1	206-587-1	PFHxS	206-587-1	#N/A	#N/A	#N/A	#N/A	#REF!	This substance has persistent, bioackumulative and toxic properties. PFHxS is among the most commonly detected PFCs in the environment and in biota, and an increasing trend over time has been observed. It has also been detected in humans. The substance ma	Official classification missing	#N/A	#N/A	#N/A	#N/A	#N/A	#N/A	#N/A	#N/A		1	0	0	0	0	0	0	0	0	0	0	1														0.3	0.3
678-41-1	211-649-6	211-649-6	8:2-diPAP	211-649-6	#N/A	#N/A	#N/A	#N/A	#REF!	This substance has persistent, bioackumulative and toxic properties. It has been detected in human blood samples and it is known to degrade into PFOA, which in turn is a PBT under REACH.	Official classification missing	#N/A	#N/A	#N/A	#N/A	#N/A	#N/A	#N/A	#N/A		1	0	0	0	0	0	0	0	0	0	0	1														0.3	0.3
2965-52-8	221-003-5	221-003-5	C8 SAmPAP	221-003-5	#N/A	#N/A	#N/A	#N/A	#REF!	This substance has persistent, bioackumulative and toxic properties.It is known to degrade into the recognised POP PFOS. It has been detected in marine sediments and human blood.	Official classification missing	#N/A	#N/A	#N/A	#N/A	#N/A	#N/A	#N/A	#N/A		1	0	0	0	0	0	0	0	0	0	0	1														0.3	0.3
37853-59-1	253-692-3	253-692-3	BTBPE	253-692-3	#N/A	#N/A	#N/A	#N/A	#REF!	This substance has persistent, bioackumulative and toxic properties. It has been detected in environmental samples from various regions including in dolphins, arctic gulls as well as domestic cats and dogs. It has also been detected in humans.	Official classification missing	#N/A	#N/A	#N/A	#N/A	#N/A	#N/A	#N/A	#N/A		1	0	0	0	0	0	0	0	0	0	0	1														0.3	0.3
90640-80-5	292-602-7	292-602-7	Anthracene oil	292-602-7	292-602-7	292-602-7	292-602-7	#N/A	#REF!	Substance is concluded to be PBT by European Chemicals Bureau PBT Working Group.; Classified CMR (Class I & II) according to Annex 1 of Directive 67/548/EEC	Carc. 1B	H350	H350	H350	Carcinogenic (Article 57a)#PBT (Article 57d)#vPvB (Article 57e)	H350	#N/A	#N/A	#N/A		1	1	0	3	1	0	0	0	0	0	0	5		#N/A	3.5	UVCB, mixture, intermediate	-40									1	5	-40	3.5
90640-82-7	292-604-8	292-604-8	Anthracene oil, anthracenelow	292-604-8	#N/A	292-604-8	#N/A	#N/A	#REF!	Substance is concluded to be PBT by European Chemicals Bureau PBT Working Group.; Classified CMR (Class I & II) according to Annex 1 of Directive 67/548/EEC	Carc. 1B Muta. 1B	H350 H340	#N/A	H350 H340	Carcinogenic (Article 57a)#Mutagenic (Article 57b)#PBT (Article 57d)#vPvB (Article 57e)	#N/A	#N/A	#N/A	#N/A		1	1	0	3	1	1	0	0	0	0	0	5		#N/A	3.5	UVCB, mixture, intermediate	-40									1	5	-40	3.5
91995-15-2	295-275-9	295-275-9	Anthracene oil, anthracene paste, anthracene fraction	295-275-9	#N/A	295-275-9	#N/A	#N/A	#REF!	Substance is concluded to be PBT by European Chemicals Bureau PBT Working Group.; Classified CMR (Class I & II) according to Annex 1 of Directive 67/548/EEC	Carc. 1B Muta. 1B	H350 H340	#N/A	H350 H340	Carcinogenic (Article 57a)#Mutagenic (Article 57b)#PBT (Article 57d)#vPvB (Article 57e)	#N/A	#N/A	#N/A	#N/A		1	1	0	3	1	1	0	0	0	0	0	5		#N/A	3.5	UVCB, mixture, intermediate	-40									1	5	-40	3.5
90640-81-6	292-603-2	292-603-2	Anthracene oil, anthracene paste	292-603-2	#N/A	292-603-2	#N/A	#N/A	#REF!	Substance is concluded to be PBT by European Chemicals Bureau PBT Working Group.; Classified CMR (Class I & II) according to Annex 1 of Directive 67/548/EEC	Carc. 1B Muta. 1B	H350 H340	#N/A	H350 H340	Carcinogenic (Article 57a)#Mutagenic (Article 57b)#PBT (Article 57d)#vPvB (Article 57e)	#N/A	#N/A	#N/A	#N/A		1	1	0	3	1	1	0	0	0	0	0	5		#N/A	3.5	UVCB, mixture, intermediate	-40									1	5	-40	3.5
91995-17-4	295-278-5	295-278-5	Anthracene oil, anthracene paste, distn. Lights	295-278-5	#N/A	295-278-5	#N/A	#N/A	#REF!	Substance is concluded to be PBT by European Chemicals Bureau PBT Working Group.; Classified CMR (Class I & II) according to Annex 1 of Directive 67/548/EEC	Carc. 1B Muta. 1B	H350 H340	#N/A	H350 H340	Carcinogenic (Article 57a)#Mutagenic (Article 57b)#PBT (Article 57d)#vPvB (Article 57e)	#N/A	#N/A	#N/A	#N/A		1	1	0	3	1	1	0	0	0	0	0	5		#N/A	3.5	UVCB, mixture, intermediate	-40									1	5	-40	3.5
158885-29-1	500-415-1	500-415-1	4,4'-methylenediphenyl diisocyanate, oligomeric reaction products with butane-1,3-diol, 2,4'-diisocyanato-diphenyl methane, 2,2'-oxydiethanol and propane-1,2-diol	#N/A	#N/A	#N/A	#N/A	500-415-1	#REF!	#N/A	#N/A	#N/A	#N/A	#N/A	#N/A	#N/A	#N/A	CMR#Suspected PBT/vPvB#Sensitiser#Consumer use#High (aggregated) tonnage#Wide dispersive use	#N/A		0.7	0.7	0	3	0	0	0	0	0	0.6	0	5		#N/A	3.5	UVCB, mixture, intermediate	-40									0.5	2.5	-40	3.5
25155-23-1	246-677-8	246-677-8	trixylyl phosphate	246-677-8	#N/A	246-677-8	246-677-8	246-677-8	#REF!	Classified CMR according to Annex VI of Regulation 1272/2008	Repr. 1B	H360F	#N/A	H360F	Toxic for reproduction (Article 57c)	H360F	H360F	Exposure of environment#Exposure of workers#High (aggregated) tonnage#High RCR#Suspected PBT/vPvB#Wide dispersive use	#N/A		0.7	0.7	0	3	0	0	1	0	0	0	0	4.4		#N/A	3.5	UVCB, mixture, intermediate	-40									1	4.4	-40	3.5
26523-78-4	247-759-6	247-759-6	Tris(nonylphenyl)phosphite	#N/A	#N/A	247-759-6	#N/A	247-759-6	#REF!	#N/A	#N/A	#N/A	#N/A	H317;_x000D_ H400;_x000D_ H410	Endocrine disrupting properties (Article 57(f) - environment)	#N/A	H317 H400 H410	Suspected PBT/vPvB#Consumer use#Exposure of sensitive populations#High (aggregated) tonnage#High RCR#Wide dispersive use	#N/A		0.7	0.7	1	0	0	0	0	1	1	0	0	4.4		#N/A	3.5	UVCB, mixture, intermediate	-40									1	4.4	-40	3.5
68855-45-8	272-486-4	272-486-4	Phenol, dodecyl-, sulfurized, calcium salts	#N/A	#N/A	#N/A	#N/A	272-486-4	#REF!	#N/A	#N/A	#N/A	#N/A	#N/A	#N/A	#N/A	#N/A	CMR#Suspected PBT/vPvB#Consumer use#High (aggregated) tonnage#Wide dispersive use	#N/A		0.7	0.7	0	3	0	0	0	0	0	0	0	4.4		#N/A	3.5	UVCB, mixture, intermediate	-40									0.5	2.2	-40	3.5
68937-41-7	-	273-066-3	henol, isopropylated, phosphate (3:1)	#N/A	#N/A	#N/A	#N/A	273-066-3	#REF!	#N/A	#N/A	#N/A	#N/A	#N/A	#N/A	#N/A	H400; H410; H411; H413; H317; H361; H373	Potential endocrine disruptor#Suspected PBT/vPvB	#N/A		0.7	0.7	1	0	0	0	1	0	0.5	0	0	3.9		#N/A	3.5	UVCB, mixture, intermediate	-40									0.5	1.95	-40	3.5
-	447-780-2	447-780-2	Shale Oil Bitumen	#N/A	#N/A	#N/A	#N/A	447-780-2	#REF!	#N/A	#N/A	#N/A	#N/A	#N/A	#N/A	#N/A	#N/A	Suspected CMR#Suspected PBT/vPvB#Exposure of environment#Exposure of workers	#N/A		0.7	0.7	0	2.1	0	0	0	0	0	0	0	3.5		#N/A	3.5	UVCB, mixture, intermediate	-40									0.5	1.75	-40	3.5
-	810-801-4	810-801-4	Benzene, mono-C11-C13-branched alkyl derivatives	#N/A	#N/A	#N/A	#N/A	810-801-4	#REF!	#N/A	#N/A	#N/A	#N/A	#N/A	#N/A	#N/A	#N/A	Suspected CMR#Suspected PBT/vPvB#High (aggregated) tonnage	#N/A		0.7	0.7	0	2.1	0	0	0	0	0	0	0	3.5		#N/A	3.5	UVCB, mixture, intermediate	-40									0.5	1.75	-40	3.5
85535-85-9	287-477-0	287-477-0	Alkanes, C14-17, chloro (MCCP, Medium chained chlorinated paraffins)	#N/A	#N/A	#N/A	#N/A	287-477-0	#REF!	#N/A	#N/A	#N/A	#N/A	#N/A	#N/A	#N/A	H362 H400 H410	Suspected PBT/vPvB#High (aggregated) tonnage#Wide dispersive use	CAT1		0.7	0.7	1	0	0	0	0	0	1	0	0	3.4		#N/A	3.5	UVCB, mixture, intermediate	-40									0.5	1.7	-40	3.5
1118-46-3	214-263-6	214-263-6	n-butyltin trichloride	#N/A	#N/A	#N/A	#N/A	214-263-6	#REF!	#N/A	#N/A	#N/A	#N/A	#N/A	#N/A	#N/A	#N/A	Suspected Mutagenic#Suspected Reprotoxic#Suspected PBT/vPvB#Consumer use#Exposure of environment#Exposure of workers#High (aggregated) tonnage#Wide dispersive use	#N/A		0.7	0.7	0	0	0	0.7	0.7	0	0	0	0	2.8														0.5	1.4
1330-78-5	809-930-9	809-930-9	Tris(methylphenyl) phosphate	#N/A	#N/A	#N/A	#N/A	809-930-9	#REF!	#N/A	#N/A	#N/A	#N/A	#N/A	#N/A	#N/A	#N/A	Suspected PBT/vPvB#Other hazard based concern#High (aggregated) tonnage#Wide dispersive use	CAT1		0.7	0.7	0	0	0	0	0	0	1	0.4	0	2.8														0.5	1.4
92-52-4	202-163-5	202-163-5	Biphenyl	#N/A	#N/A	#N/A	#N/A	202-163-5	#REF!	#N/A	#N/A	#N/A	#N/A	#N/A	#N/A	#N/A	H335 H315 H319 H400 H410	Suspected PBT/vPvB#High (aggregated) tonnage	CAT3a		0.7	0.7	1	0	0	0	0	0	0.3	0	0	2.7														0.5	1.35
85-60-9	201-618-5	201-618-5	6,6'-di-tert-butyl-4,4'-butylidenedi-m-cresol	#N/A	#N/A	#N/A	#N/A	201-618-5	#REF!	#N/A	#N/A	#N/A	#N/A	#N/A	#N/A	#N/A	#N/A	Suspected Reprotoxic#Potential endocrine disruptor#Suspected PBT/vPvB#Consumer use#Exposure of environment#Exposure of workers#Wide dispersive use	#N/A		0.7	0.7	0	0	0	0	0.7	0	0.5	0	0	2.6														0.5	1.3
870-08-6	212-791-1	212-791-1	dioctyltin oxide	#N/A	#N/A	#N/A	#N/A	212-791-1	#REF!	#N/A	#N/A	#N/A	#N/A	#N/A	#N/A	#N/A	#N/A	Suspected Reprotoxic#Potential endocrine disruptor#Suspected PBT/vPvB#Consumer use#Exposure of environment#Exposure of workers#High (aggregated) tonnage#High RCR#Wide dispersive use	#N/A		0.7	0.7	0	0	0	0	0.7	0	0.5	0	0	2.6														0.5	1.3
13927-71-4	237-695-7	237-695-7	Bis(dibutyldithiocarbamato-S,S')copper	#N/A	#N/A	#N/A	#N/A	237-695-7	#REF!	#N/A	#N/A	#N/A	#N/A	#N/A	#N/A	#N/A	#N/A	Suspected Reprotoxic#Potential endocrine disruptor#Suspected PBT/vPvB#Exposure of workers	#N/A		0.7	0.7	0	0	0	0	0.7	0	0.5	0	0	2.6														0.5	1.3
57583-54-7	260-830-6	260-830-6	Tetraphenyl m-phenylene bis(phosphate)	#N/A	#N/A	#N/A	#N/A	260-830-6	#REF!	#N/A	#N/A	#N/A	#N/A	#N/A	#N/A	#N/A	#N/A	Suspected Reprotoxic#Potential endocrine disruptor#Suspected PBT/vPvB#Consumer use#Exposure of environment#Exposure of workers#High (aggregated) tonnage#Wide dispersive use	#N/A		0.7	0.7	0	0	0	0	0.7	0	0.5	0	0	2.6														0.5	1.3
-	941-303-6	941-303-6	Esterification products of 1,3-dioxo-2-benzofuran-5-carboxylic acid with nonan-1-ol	#N/A	#N/A	#N/A	#N/A	941-303-6	#REF!	#N/A	#N/A	#N/A	#N/A	#N/A	#N/A	#N/A	#N/A	Suspected Reprotoxic#Potential endocrine disruptor#Suspected PBT/vPvB#Consumer use#Exposure of environment	#N/A		0.7	0.7	0	0	0	0	0.7	0	0.5	0	0	2.6														0.5	1.3
3891-98-3	622-542-2	622-542-2	2,6,10-Trimethyldodecane (Farnesane)	#N/A	#N/A	#N/A	#N/A	622-542-2	#REF!	#N/A	#N/A	#N/A	#N/A	#N/A	#N/A	#N/A	#N/A	Suspected Mutagenic#Suspected PBT/vPvB#Suspected Sensitiser#Consumer use#Exposure of environment#Exposure of workers	#N/A		0.7	0.7	0	0	0	0.7	0	0	0	0.4	0	2.5														0.5	1.25
80-43-3	201-279-3	201-279-3	bis(α,α-dimethylbenzyl) peroxide	#N/A	#N/A	#N/A	#N/A	201-279-3	#REF!	#N/A	#N/A	#N/A	#N/A	#N/A	#N/A	#N/A	H242 H315 H319 H411	Suspected PBT/vPvB#Consumer use#Exposure of environment#Exposure of workers#High (aggregated) tonnage#High RCR#Wide dispersive use	#N/A		0.7	0.7	1	0	0	0	0	0	0	0	0	2.4														0.5	1.2
108-87-2	203-624-3	203-624-3	Methylcyclohexane	#N/A	#N/A	#N/A	#N/A	203-624-3	#REF!	#N/A	#N/A	#N/A	#N/A	#N/A	#N/A	#N/A	H225 H304 H336 H315 H411	Suspected PBT/vPvB#Consumer use#High (aggregated) tonnage#Wide dispersive use	#N/A		0.7	0.7	1	0	0	0	0	0	0	0	0	2.4														0.5	1.2
31394-54-4	250-610-8	250-610-8	Isoheptane	#N/A	#N/A	#N/A	#N/A	250-610-8	#REF!	#N/A	#N/A	#N/A	#N/A	#N/A	#N/A	#N/A	H225 H304 H336 H315 H400 H410	Suspected PBT/vPvB#High (aggregated) tonnage#Wide dispersive use	#N/A		0.7	0.7	1	0	0	0	0	0	0	0	0	2.4														0.5	1.2
118832-72-7	404-800-4	404-800-4	Iso(C10-C14)alkyl (3,5-di-tert-butyl-4-hydroxyphenyl)methylthioacetate	#N/A	#N/A	#N/A	#N/A	404-800-4	#REF!	#N/A	#N/A	#N/A	#N/A	#N/A	#N/A	#N/A	H400 H410	Suspected PBT/vPvB	#N/A		0.7	0.7	1	0	0	0	0	0	0	0	0	2.4														0.5	1.2
192268-65-8	421-820-9	421-820-9	a mixture of: triphenylthiophosphate and tertiary butylated phenyl derivatives	#N/A	#N/A	#N/A	#N/A	421-820-9	#REF!	#N/A	#N/A	#N/A	#N/A	#N/A	#N/A	#N/A	H413	Suspected PBT/vPvB	#N/A		0.7	0.7	1	0	0	0	0	0	0	0	0	2.4														0.5	1.2
-	430-050-2	430-050-2	A mixture of: N,N'-ethane-1,2-diylbis(decanamide); 12-hydroxy-N-[2-[1-oxydecyl)amino]ethyl]octadecanamide; N,N'-ethane-1,2-diylbis(12-hydroxyoctadecanamide)	#N/A	#N/A	#N/A	#N/A	430-050-2	#REF!	#N/A	#N/A	#N/A	#N/A	#N/A	#N/A	#N/A	H317 H411	Suspected PBT/vPvB#Exposure of environment#Wide dispersive use	#N/A		0.7	0.7	1	0	0	0	0	0	0	0	0	2.4														0.5	1.2
297730-93-9	435-790-1	435-790-1	3-ethoxy-1,1,1,2,3,4,4,5,5,6,6,6-dodecafluoro-2-(trifluoromethyl)-hexane	#N/A	#N/A	#N/A	#N/A	435-790-1	#REF!	#N/A	#N/A	#N/A	#N/A	#N/A	#N/A	#N/A	H413	Suspected PBT/vPvB#Exposure of environment#Wide dispersive use	#N/A		0.7	0.7	1	0	0	0	0	0	0	0	0	2.4														0.5	1.2
62037-80-3	-	700-242-3	GenX; Propanoic acid, 2,3,3,3-tetrafluoro-2-(1,1,2,2,3,3,3-	700-242-3	#N/A	700-242-3	#N/A	700-242-3	#REF!	Substance is concluded to be a substance of equivalent level of concern (57f) SVHC by ECHA Member State Committee due to its persistence, mobility, potential for long-range transport and observed adverse effects.	0	#N/A	#N/A	#N/A	Equivalent level of concern having probable serious effects to human health (Article 57(f) - human health)#Equivalent level of concern having probable serious effects to the environment (Article 57(f) - environment)	#N/A	#N/A	Suspected PBT/vPvB#Exposure of environment	#N/A		0.7	0.7	0	0	0	0	0	1	0	0	0	2.4														1	2.4
62037-80-3	700-242-3	700-242-3	ammonium 2,3,3,3-tetrafluoro-2-(heptafluoropropoxy)propanoate	700-242-3	#N/A	700-242-3	#N/A	700-242-3	#REF!	Substance is concluded to be a substance of equivalent level of concern (57f) SVHC by ECHA Member State Committee due to its persistence, mobility, potential for long-range transport and observed adverse effects.	0	#N/A	#N/A	#N/A	Equivalent level of concern having probable serious effects to human health (Article 57(f) - human health)#Equivalent level of concern having probable serious effects to the environment (Article 57(f) - environment)	#N/A	#N/A	Suspected PBT/vPvB#Exposure of environment	#N/A		0.7	0.7	0	0	0	0	0	1	0	0	0	2.4														1	2.4
1594-08-7	-	216-475-4	-	#N/A	#N/A	#N/A	#N/A	216-475-4	#REF!	#N/A	#N/A	#N/A	#N/A	#N/A	#N/A	#N/A	H400; H410; H317; H319	Suspected PBT/vPvB	#N/A		0.7	0.7	1	0	0	0	0	0	0	0	0	2.4														0.5	1.2
6358-31-2	-	228-768-4	-	#N/A	#N/A	#N/A	#N/A	228-768-4	#REF!	#N/A	#N/A	#N/A	#N/A	#N/A	#N/A	#N/A	H303; H315; H319; H361	Suspected PBT/vPvB#Exposure of environment#High (aggregated) tonnage#Wide dispersive use	#N/A		0.7	0.7	0	0	0	0	1	0	0	0	0	2.4														0.5	1.2
-	-	400-370-7	-	#N/A	#N/A	#N/A	#N/A	400-370-7	#REF!	#N/A	#N/A	#N/A	#N/A	#N/A	#N/A	#N/A	H400; H410	Suspected PBT/vPvB#Exposure of environment	#N/A		0.7	0.7	1	0	0	0	0	0	0	0	0	2.4														0.5	1.2
-	-	422-270-2	-	#N/A	#N/A	#N/A	#N/A	422-270-2	#REF!	#N/A	#N/A	#N/A	#N/A	#N/A	#N/A	#N/A	H413	Suspected PBT/vPvB	#N/A		0.7	0.7	1	0	0	0	0	0	0	0	0	2.4														0.5	1.2
-	-	484-410-9	-	#N/A	#N/A	#N/A	#N/A	484-410-9	#REF!	#N/A	#N/A	#N/A	#N/A	#N/A	#N/A	#N/A	H413	Suspected PBT/vPvB	#N/A		0.7	0.7	1	0	0	0	0	0	0	0	0	2.4														0.5	1.2
2144-53-8	218-407-9	218-407-9	3,3,4,4,5,5,6,6,7,7,8,8,8-tridecafluorooctyl methacrylate	#N/A	#N/A	#N/A	#N/A	218-407-9	#REF!	#N/A	#N/A	#N/A	#N/A	#N/A	#N/A	#N/A	#N/A	Potential endocrine disruptor#Suspected PBT/vPvB#Other hazard based concern#Exposure of environment#Wide dispersive use	#N/A		0.7	0.7	0	0	0	0	0	0	0.5	0.4	0	2.3														0.5	1.15
17527-29-6	241-527-8	241-527-8	3,3,4,4,5,5,6,6,7,7,8,8,8-tridecafluorooctyl acrylate	#N/A	#N/A	#N/A	#N/A	241-527-8	#REF!	#N/A	#N/A	#N/A	#N/A	#N/A	#N/A	#N/A	#N/A	Potential endocrine disruptor#Suspected PBT/vPvB#Other hazard based concern#Exposure of environment#Wide dispersive use	#N/A		0.7	0.7	0	0	0	0	0	0	0.5	0.4	0	2.3														0.5	1.15
26040-51-7	247-426-5	247-426-5	BEH-TEBP	247-426-5	#N/A	#N/A	#N/A	247-426-5	#REF!	This substance has persistent, bioackumulative and toxic properties.It has been found in mammals, fish, bivalves and crustaceans. Both empirical and modelled data show PBT properties of this substance.	Official classification missing	#N/A	#N/A	#N/A	#N/A	#N/A	#N/A	Potential endocrine disruptor#Suspected PBT/vPvB#Other hazard based concern#Exposure of environment#Wide dispersive use	#N/A		0.7	0.7	0	0	0	0	0	0	0.5	0.4	0	2.3														0.5	1.15
99-62-7	202-773-1	202-773-1	1,3-diisopropylbenzene	#N/A	#N/A	#N/A	#N/A	202-773-1	#REF!	#N/A	#N/A	#N/A	#N/A	#N/A	#N/A	#N/A	#N/A	Suspected Reprotoxic#Suspected PBT/vPvB#Exposure of workers	#N/A		0.7	0.7	0	0	0	0	0.7	0	0	0	0	2.1														0.5	1.05
100-18-5	202-826-9	202-826-9	1,4-diisopropylbenzene	#N/A	#N/A	#N/A	#N/A	202-826-9	#REF!	#N/A	#N/A	#N/A	#N/A	#N/A	#N/A	#N/A	#N/A	Suspected Reprotoxic#Suspected PBT/vPvB#Exposure of workers	#N/A		0.7	0.7	0	0	0	0	0.7	0	0	0	0	2.1														0.5	1.05
108-77-0	203-614-9	203-614-9	2,4,6-trichloro-1,3,5-triazine	#N/A	#N/A	#N/A	#N/A	203-614-9	#REF!	#N/A	#N/A	#N/A	#N/A	#N/A	#N/A	#N/A	H330 H302 H314 H317	Suspected Reprotoxic#Suspected PBT/vPvB#Exposure of environment#High (aggregated) tonnage	#N/A		0.7	0.7	0	0	0	0	0.7	0	0	0	0	2.1														0.5	1.05
25321-09-9	246-835-6	246-835-6	diisopropylbenzene	#N/A	#N/A	#N/A	#N/A	246-835-6	#REF!	#N/A	#N/A	#N/A	#N/A	#N/A	#N/A	#N/A	#N/A	Suspected Reprotoxic#Suspected PBT/vPvB#Exposure of workers	#N/A		0.7	0.7	0	0	0	0	0.7	0	0	0	0	2.1														0.5	1.05
36878-20-3	253-249-4	253-249-4	Bis(nonylphenyl)amine	#N/A	#N/A	#N/A	#N/A	253-249-4	#REF!	#N/A	#N/A	#N/A	#N/A	#N/A	#N/A	#N/A	#N/A	Suspected Mutagenic#Suspected PBT/vPvB#High (aggregated) tonnage	#N/A		0.7	0.7	0	0	0	0.7	0	0	0	0	0	2.1														0.5	1.05
51-03-6	200-076-7	200-076-7	2-(2-butoxyethoxy)ethyl 6-propylpiperonyl ether	#N/A	#N/A	#N/A	#N/A	200-076-7	#REF!	#N/A	#N/A	#N/A	#N/A	#N/A	#N/A	#N/A	#N/A	Potential endocrine disruptor#Suspected PBT/vPvB#Consumer use#Wide dispersive use	CAT2		0.7	0.7	0	0	0	0	0	0	0.5	0	0	1.9														0.5	0.95
21850-44-2	244-617-5	244-617-5	1,1'-(isopropylidene)bis[3,5-dibromo-4-(2,3-dibromopropoxy)benzene]	#N/A	#N/A	#N/A	#N/A	244-617-5	#REF!	#N/A	#N/A	#N/A	#N/A	#N/A	#N/A	#N/A	#N/A	Potential endocrine disruptor#Suspected PBT/vPvB#High (aggregated) tonnage	#N/A		0.7	0.7	0	0	0	0	0	0	0.5	0	0	1.9														0.5	0.95
32388-55-9	251-020-3	251-020-3	[3R-(3α,3aβ,7β,8aα)]-1-(2,3,4,7,8,8a-hexahydro-3,6,8,8-tetramethyl-1H-3a,7-methanoazulen-5-yl)ethan-1-one	#N/A	#N/A	#N/A	#N/A	251-020-3	#REF!	#N/A	#N/A	#N/A	#N/A	#N/A	#N/A	#N/A	#N/A	Potential endocrine disruptor#Suspected PBT/vPvB	#N/A		0.7	0.7	0	0	0	0	0	0	0.5	0	0	1.9														0.5	0.95
61788-44-1	262-975-0	262-975-0	phenol, styrenated,reaction mass of 2,4,6-tris(1-phenyl-ethyl)phenol and Bis(1-phenylethyl) phenol	#N/A	#N/A	#N/A	#N/A	262-975-0	#REF!	#N/A	#N/A	#N/A	#N/A	#N/A	#N/A	#N/A	#N/A	Cumulative exposure#Potential endocrine disruptor#Suspected PBT/vPvB	#N/A		0.7	0.7	0	0	0	0	0	0	0.5	0	0	1.9														0.5	0.95
97416-84-7	306-832-3	306-832-3	1,1'-(isopropylidene)bis[3,5-dibromo-4-(2,3-dibromo-2-methylpropoxy)benzene]	#N/A	#N/A	#N/A	#N/A	306-832-3	#REF!	#N/A	#N/A	#N/A	#N/A	#N/A	#N/A	#N/A	#N/A	Potential endocrine disruptor#Suspected PBT/vPvB#Exposure of environment	#N/A		0.7	0.7	0	0	0	0	0	0	0.5	0	0	1.9														0.5	0.95
83834-59-7	629-661-9	629-661-9	2-Ethylhexyl trans-4-methoxycinnamate	#N/A	#N/A	#N/A	#N/A	629-661-9	#REF!	#N/A	#N/A	#N/A	#N/A	#N/A	#N/A	#N/A	#N/A	Potential endocrine disruptor#Suspected PBT/vPvB#Consumer use#Exposure of environment#High (aggregated) tonnage#Other exposure/risk based concern#Wide dispersive use	#N/A		0.7	0.7	0	0	0	0	0	0	0.5	0	0	1.9														0.5	0.95
32588-76-4	251-118-6	251-118-6	N,N'-ethylenebis(3,4,5,6-tetrabromophthalimide	#N/A	#N/A	#N/A	#N/A	251-118-6	#REF!	#N/A	#N/A	#N/A	#N/A	#N/A	#N/A	#N/A	#N/A	Suspected PBT/vPvB#Other hazard based concern#Consumer use#Exposure of environment#Exposure of workers#Wide dispersive use	#N/A		0.7	0.7	0	0	0	0	0	0	0	0.4	0	1.8														0.5	0.9
67584-55-8	266-733-5	266-733-5	2-[methyl[(nonafluorobutyl) sulpho-nyl]amino]ethyl acrylate	#N/A	#N/A	#N/A	#N/A	266-733-5	#REF!	#N/A	#N/A	#N/A	#N/A	#N/A	#N/A	#N/A	#N/A	Suspected PBT/vPvB#Other hazard based concern#Exposure of environment#Wide dispersive use	#N/A		0.7	0.7	0	0	0	0	0	0	0	0.4	0	1.8														0.5	0.9
52299-25-9	700-183-3	700-183-3	bis(nonafluorobutyl)phosphinic acid	#N/A	#N/A	#N/A	#N/A	700-183-3	#REF!	#N/A	#N/A	#N/A	#N/A	#N/A	#N/A	#N/A	#N/A	Suspected PBT/vPvB#Other hazard based concern#Exposure of environment	#N/A		0.7	0.7	0	0	0	0	0	0	0	0.4	0	1.8														0.5	0.9
1379524-06-7	800-353-8	800-353-8	amides, C18-unsatd., N-[3-(dimethylamine)propyl]	#N/A	#N/A	#N/A	#N/A	800-353-8	#REF!	#N/A	#N/A	#N/A	#N/A	#N/A	#N/A	#N/A	#N/A	Suspected PBT/vPvB#Other hazard based concern#Exposure of environment#High RCR#Wide dispersive use	#N/A		0.7	0.7	0	0	0	0	0	0	0	0.4	0	1.8														0.5	0.9
75-78-5	200-901-0	200-901-0	Dichloro(dimethyl)silane	#N/A	#N/A	#N/A	#N/A	200-901-0	#REF!	#N/A	#N/A	#N/A	#N/A	#N/A	#N/A	#N/A	H225 H335 H315 H319	Suspected PBT/vPvB#High (aggregated) tonnage	#N/A		0.7	0.7	0	0	0	0	0	0	0	0	0	1.4														0.5	0.7
79-74-3	201-222-2	201-222-2	2,5-di-tert-pentylhydroquinone	#N/A	#N/A	#N/A	#N/A	201-222-2	#REF!	#N/A	#N/A	#N/A	#N/A	#N/A	#N/A	#N/A	#N/A	Suspected PBT/vPvB#High RCR	#N/A		0.7	0.7	0	0	0	0	0	0	0	0	0	1.4														0.5	0.7
80-07-9	201-247-9	201-247-9	bis(4-chlorophenyl) sulphone	#N/A	#N/A	#N/A	#N/A	201-247-9	#REF!	#N/A	#N/A	#N/A	#N/A	#N/A	#N/A	#N/A	#N/A	Suspected PBT/vPvB#High (aggregated) tonnage#Wide dispersive use	#N/A		0.7	0.7	0	0	0	0	0	0	0	0	0	1.4														0.5	0.7
81-33-4	-	201-344-6	-	#N/A	#N/A	#N/A	#N/A	201-344-6	#REF!	#N/A	#N/A	#N/A	#N/A	#N/A	#N/A	#N/A	#N/A	Suspected PBT/vPvB	#N/A		0.7	0.7	0	0	0	0	0	0	0	0	0	1.4														0.5	0.7
90-30-2	201-983-0	201-983-0	N-1-naphthylaniline	#N/A	#N/A	#N/A	#N/A	201-983-0	#REF!	#N/A	#N/A	#N/A	#N/A	#N/A	#N/A	#N/A	#N/A	Suspected PBT/vPvB#Wide dispersive use	#N/A		0.7	0.7	0	0	0	0	0	0	0	0	0	1.4														0.5	0.7
91-17-8	202-046-9	202-046-9	decahydronaphthalene	#N/A	#N/A	#N/A	#N/A	202-046-9	#REF!	#N/A	#N/A	#N/A	#N/A	#N/A	#N/A	#N/A	#N/A	Suspected PBT/vPvB#High (aggregated) tonnage	#N/A		0.7	0.7	0	0	0	0	0	0	0	0	0	1.4														0.5	0.7
106-20-7	-	203-372-4	-	#N/A	#N/A	#N/A	#N/A	203-372-4	#REF!	#N/A	#N/A	#N/A	#N/A	#N/A	#N/A	#N/A	#N/A	Suspected PBT/vPvB#Exposure of environment	#N/A		0.7	0.7	0	0	0	0	0	0	0	0	0	1.4														0.5	0.7
107-51-7	203-497-4	203-497-4	Octamethyltrisiloxane	#N/A	#N/A	#N/A	#N/A	203-497-4	#REF!	#N/A	#N/A	#N/A	#N/A	#N/A	#N/A	#N/A	#N/A	Suspected PBT/vPvB#Consumer use#Wide dispersive use	#N/A		0.7	0.7	0	0	0	0	0	0	0	0	0	1.4														0.5	0.7
112-03-8	203-929-1	203-929-1	Trimethyloctadecylammonium chloride	#N/A	#N/A	#N/A	#N/A	203-929-1	#REF!	#N/A	#N/A	#N/A	#N/A	#N/A	#N/A	#N/A	#N/A	Suspected PBT/vPvB#Exposure of environment#Wide dispersive use	#N/A		0.7	0.7	0	0	0	0	0	0	0	0	0	1.4														0.5	0.7
133-66-4	205-117-2	205-117-2	Disodium 4,4'-bis[(4,6-dianilino-1,3,5-triazin-2-yl)amino]stilbene-2,2'-disulphonate	#N/A	#N/A	#N/A	#N/A	205-117-2	#REF!	#N/A	#N/A	#N/A	#N/A	#N/A	#N/A	#N/A	#N/A	Suspected PBT/vPvB#Wide dispersive use	#N/A		0.7	0.7	0	0	0	0	0	0	0	0	0	1.4														0.5	0.7
135-57-9	205-201-9	205-201-9	N,N'-dithiodi-o-phenylenedibenzamide	#N/A	#N/A	#N/A	#N/A	205-201-9	#REF!	#N/A	#N/A	#N/A	#N/A	#N/A	#N/A	#N/A	#N/A	Suspected PBT/vPvB#Exposure of environment	#N/A		0.7	0.7	0	0	0	0	0	0	0	0	0	1.4														0.5	0.7
141-62-8	205-491-7	205-491-7	decamethyltetrasiloxane	#N/A	#N/A	#N/A	#N/A	205-491-7	#REF!	#N/A	#N/A	#N/A	#N/A	#N/A	#N/A	#N/A	#N/A	Suspected PBT/vPvB#Exposure of environment#Wide dispersive use	#N/A		0.7	0.7	0	0	0	0	0	0	0	0	0	1.4														0.5	0.7
141-63-9	205-492-2	205-492-2	dodecamethylpenta-siloxane	#N/A	#N/A	#N/A	#N/A	205-492-2	#REF!	#N/A	#N/A	#N/A	#N/A	#N/A	#N/A	#N/A	#N/A	Suspected PBT/vPvB#Exposure of environment#Wide dispersive use	#N/A		0.7	0.7	0	0	0	0	0	0	0	0	0	1.4														0.5	0.7
338-83-0	206-420-2	206-420-2	Perfluamine	206-420-2	#N/A	#N/A	#N/A	206-420-2	#REF!	This substance is very Persistent and very Bioaccumulative	0	#N/A	#N/A	#N/A	#N/A	#N/A	#N/A	Suspected PBT/vPvB#Exposure of environment	#N/A		0.7	0.7	0	0	0	0	0	0	0	0	0	1.4														0.5	0.7
597-82-0	209-909-9	209-909-9	O,O,O-triphenyl phosphorothioate	#N/A	#N/A	#N/A	#N/A	209-909-9	#REF!	#N/A	#N/A	#N/A	#N/A	#N/A	#N/A	#N/A	#N/A	Suspected PBT/vPvB	#N/A		0.7	0.7	0	0	0	0	0	0	0	0	0	1.4														0.5	0.7
732-26-3	211-989-5	211-989-5	2,4,6-Tri-tert-butylphenol	211-989-5	#N/A	#N/A	#N/A	211-989-5	#REF!	This substance has persistent, bioackumulative and toxic properties. The substance shows both experimental and estimated P, B and T properties. It has been found in environmental samples including fish.	Official classification missing	#N/A	#N/A	#N/A	#N/A	#N/A	#N/A	Suspected PBT/vPvB#Exposure of environment	#N/A		0.7	0.7	0	0	0	0	0	0	0	0	0	1.4														0.5	0.7
1873-88-7	217-496-1	217-496-1	1,1,1,3,5,5,5-heptamethyltrisiloxane	#N/A	#N/A	#N/A	#N/A	217-496-1	#REF!	#N/A	#N/A	#N/A	#N/A	#N/A	#N/A	#N/A	#N/A	Suspected PBT/vPvB	#N/A		0.7	0.7	0	0	0	0	0	0	0	0	0	1.4														0.5	0.7
2162-74-5	218-487-5	218-487-5	Bis(2,6-diisopropylphenyl)carbodiimide	#N/A	#N/A	#N/A	#N/A	218-487-5	#REF!	#N/A	#N/A	#N/A	#N/A	#N/A	#N/A	#N/A	#N/A	Suspected PBT/vPvB#Exposure of environment#Wide dispersive use	#N/A		0.7	0.7	0	0	0	0	0	0	0	0	0	1.4														0.5	0.7
2224-33-1	218-747-8	218-747-8	Butan-2-one O,O',O''-(vinylsilylidyne)trioxime	#N/A	#N/A	#N/A	#N/A	218-747-8	#REF!	#N/A	#N/A	#N/A	#N/A	#N/A	#N/A	#N/A	#N/A	Suspected PBT/vPvB#Exposure of environment#Wide dispersive use	#N/A		0.7	0.7	0	0	0	0	0	0	0	0	0	1.4														0.5	0.7
3081-01-4	221-374-3	221-374-3	N-(1,4-dimethylpentyl)-N'-phenylbenzene-1,4-diamine	#N/A	#N/A	#N/A	#N/A	221-374-3	#REF!	#N/A	#N/A	#N/A	#N/A	#N/A	#N/A	#N/A	#N/A	Suspected PBT/vPvB#Wide dispersive use	#N/A		0.7	0.7	0	0	0	0	0	0	0	0	0	1.4														0.5	0.7
3081-14-9	221-375-9	221-375-9	N,N'-bis(1,4-dimethylpentyl)-phenylenediamine	#N/A	#N/A	#N/A	#N/A	221-375-9	#REF!	#N/A	#N/A	#N/A	#N/A	#N/A	#N/A	#N/A	#N/A	Suspected PBT/vPvB#High (aggregated) tonnage	#N/A		0.7	0.7	0	0	0	0	0	0	0	0	0	1.4														0.5	0.7
3319-31-1	222-020-0	222-020-0	tris(2-ethylhexyl)-benzene-1,2,4-tricarboxylate	#N/A	#N/A	#N/A	#N/A	222-020-0	#REF!	#N/A	#N/A	#N/A	#N/A	#N/A	#N/A	#N/A	#N/A	Suspected PBT/vPvB#High (aggregated) tonnage#Wide dispersive use	#N/A		0.7	0.7	0	0	0	0	0	0	0	0	0	1.4														0.5	0.7
5521-31-3	-	226-866-1	-	#N/A	#N/A	#N/A	#N/A	226-866-1	#REF!	#N/A	#N/A	#N/A	#N/A	#N/A	#N/A	#N/A	H313; H319; H335	Suspected PBT/vPvB	#N/A		0.7	0.7	0	0	0	0	0	0	0	0	0	1.4														0.5	0.7
6197-30-4	228-250-8	228-250-8	Octocrilene	#N/A	#N/A	#N/A	#N/A	228-250-8	#REF!	#N/A	#N/A	#N/A	#N/A	#N/A	#N/A	#N/A	#N/A	Suspected PBT/vPvB#High (aggregated) tonnage#Wide dispersive use	#N/A		0.7	0.7	0	0	0	0	0	0	0	0	0	1.4														0.5	0.7
6486-23-3	-	229-355-1	-	#N/A	#N/A	#N/A	#N/A	229-355-1	#REF!	#N/A	#N/A	#N/A	#N/A	#N/A	#N/A	#N/A	H302; H318	Suspected PBT/vPvB#Exposure of environment#High (aggregated) tonnage#Wide dispersive use	#N/A		0.7	0.7	0	0	0	0	0	0	0	0	0	1.4														0.5	0.7
6528-34-3	-	229-419-9	-	#N/A	#N/A	#N/A	#N/A	229-419-9	#REF!	#N/A	#N/A	#N/A	#N/A	#N/A	#N/A	#N/A	#N/A	Suspected PBT/vPvB#Exposure of environment#High (aggregated) tonnage#Wide dispersive use	#N/A		0.7	0.7	0	0	0	0	0	0	0	0	0	1.4														0.5	0.7
6731-36-8	229-782-3	229-782-3	Di-tert-butyl 3,3,5-trimethylcyclohexylidene diperoxide	#N/A	#N/A	#N/A	#N/A	229-782-3	#REF!	#N/A	#N/A	#N/A	#N/A	#N/A	#N/A	#N/A	#N/A	Suspected PBT/vPvB	#N/A		0.7	0.7	0	0	0	0	0	0	0	0	0	1.4														0.5	0.7
10254-57-6	233-593-1	233-593-1	4,4'-methylene bis(dibutyldithiocarbamate)	#N/A	#N/A	#N/A	#N/A	233-593-1	#REF!	#N/A	#N/A	#N/A	#N/A	#N/A	#N/A	#N/A	#N/A	Suspected PBT/vPvB	#N/A		0.7	0.7	0	0	0	0	0	0	0	0	0	1.4														0.5	0.7
17928-28-8	241-867-7	241-867-7	1,1,1,3,5,5,5-heptamethyl-3-[(trimethylsilyl)oxy]trisiloxane	#N/A	#N/A	#N/A	#N/A	241-867-7	#REF!	#N/A	#N/A	#N/A	#N/A	#N/A	#N/A	#N/A	#N/A	Suspected PBT/vPvB#Wide dispersive use	#N/A		0.7	0.7	0	0	0	0	0	0	0	0	0	1.4														0.5	0.7
22984-54-9	245-366-4	245-366-4	Butan-2-one O,O',O''-(methylsilylidyne)trioxime	#N/A	#N/A	#N/A	#N/A	245-366-4	#REF!	#N/A	#N/A	#N/A	#N/A	#N/A	#N/A	#N/A	#N/A	Suspected PBT/vPvB#Exposure of environment#Wide dispersive use	#N/A		0.7	0.7	0	0	0	0	0	0	0	0	0	1.4														0.5	0.7
25155-25-3	246-678-3	246-678-3	[1,3(or 1,4)-phenylenebis(1-methylethylidene)]bis[tert-butyl] peroxide	#N/A	#N/A	#N/A	#N/A	246-678-3	#REF!	#N/A	#N/A	#N/A	#N/A	#N/A	#N/A	#N/A	#N/A	Suspected PBT/vPvB#High (aggregated) tonnage#Wide dispersive use	#N/A		0.7	0.7	0	0	0	0	0	0	0	0	0	1.4														0.5	0.7
25640-78-2	247-156-8	247-156-8	(1-methylethyl)-1,1'-biphenyl	#N/A	#N/A	#N/A	#N/A	247-156-8	#REF!	#N/A	#N/A	#N/A	#N/A	#N/A	#N/A	#N/A	#N/A	Suspected PBT/vPvB#Wide dispersive use	#N/A		0.7	0.7	0	0	0	0	0	0	0	0	0	1.4														0.5	0.7
26401-35-4	247-660-8	247-660-8	Diisotridecyl adipate	#N/A	#N/A	#N/A	#N/A	247-660-8	#REF!	#N/A	#N/A	#N/A	#N/A	#N/A	#N/A	#N/A	#N/A	Suspected PBT/vPvB#High (aggregated) tonnage#Other exposure/risk based concern#Wide dispersive use	#N/A		0.7	0.7	0	0	0	0	0	0	0	0	0	1.4														0.5	0.7
28299-41-4	248-948-6	248-948-6	Ditolyl ether	#N/A	#N/A	#N/A	#N/A	248-948-6	#REF!	#N/A	#N/A	#N/A	#N/A	#N/A	#N/A	#N/A	#N/A	Suspected PBT/vPvB#High (aggregated) tonnage	#N/A		0.7	0.7	0	0	0	0	0	0	0	0	0	1.4														0.5	0.7
28472-97-1	249-044-4	249-044-4	Diisodecyl azelate	#N/A	#N/A	#N/A	#N/A	249-044-4	#REF!	#N/A	#N/A	#N/A	#N/A	#N/A	#N/A	#N/A	#N/A	Consumer use#High (aggregated) tonnage#Suspected PBT/vPvB#Wide dispersive use	#N/A		0.7	0.7	0	0	0	0	0	0	0	0	0	1.4														0.5	0.7
29253-36-9	249-535-3	249-535-3	isopropylnaphthalene	#N/A	#N/A	#N/A	#N/A	249-535-3	#REF!	#N/A	#N/A	#N/A	#N/A	#N/A	#N/A	#N/A	#N/A	Suspected PBT/vPvB#Exposure of environment#Wide dispersive use	#N/A		0.7	0.7	0	0	0	0	0	0	0	0	0	1.4														0.5	0.7
38103-06-9	253-781-7	253-781-7	4,4'-[(isopropylidene)bis (p-phenyleneoxy)]diphthalic dianhydride	#N/A	#N/A	#N/A	#N/A	253-781-7	#REF!	#N/A	#N/A	#N/A	#N/A	#N/A	#N/A	#N/A	#N/A	Suspected PBT/vPvB#High (aggregated) tonnage	#N/A		0.7	0.7	0	0	0	0	0	0	0	0	0	1.4														0.5	0.7
38640-62-9	254-052-6	254-052-6	Bis(isopropyl)naphthalene	#N/A	#N/A	#N/A	#N/A	254-052-6	#REF!	#N/A	#N/A	#N/A	#N/A	#N/A	#N/A	#N/A	#N/A	Suspected PBT/vPvB#High (aggregated) tonnage#Wide dispersive use	#N/A		0.7	0.7	0	0	0	0	0	0	0	0	0	1.4														0.5	0.7
63393-96-4	264-120-7	264-120-7	quaternary ammonium compounds, tri-C8-10-alkylmethyl, chlorides	#N/A	#N/A	#N/A	#N/A	264-120-7	#REF!	#N/A	#N/A	#N/A	#N/A	#N/A	#N/A	#N/A	#N/A	Suspected PBT/vPvB#Exposure of environment#High RCR#Wide dispersive use	#N/A		0.7	0.7	0	0	0	0	0	0	0	0	0	1.4														0.5	0.7
64365-17-9	264-848-5	264-848-5	Resin acids and Rosin acids, hydrogenated, esters with pentaerythritol	#N/A	#N/A	#N/A	#N/A	264-848-5	#REF!	#N/A	#N/A	#N/A	#N/A	#N/A	#N/A	#N/A	#N/A	Suspected PBT/vPvB#Consumer use#Exposure of environment#High (aggregated) tonnage#Wide dispersive use	#N/A		0.7	0.7	0	0	0	0	0	0	0	0	0	1.4														0.5	0.7
65997-13-9	266-042-9	266-042-9	Resin acids and Rosin acids, hydrogenated, esters with glycerol	#N/A	#N/A	#N/A	#N/A	266-042-9	#REF!	#N/A	#N/A	#N/A	#N/A	#N/A	#N/A	#N/A	#N/A	Suspected PBT/vPvB#Consumer use#Exposure of environment#High (aggregated) tonnage#Wide dispersive use	#N/A		0.7	0.7	0	0	0	0	0	0	0	0	0	1.4														0.5	0.7
67905-17-3	-	267-636-0	-	#N/A	#N/A	#N/A	#N/A	267-636-0	#REF!	#N/A	#N/A	#N/A	#N/A	#N/A	#N/A	#N/A	H400; H319	Suspected PBT/vPvB	#N/A		0.7	0.7	0	0	0	0	0	0	0	0	0	1.4														0.5	0.7
68411-46-1	270-128-1	270-128-1	Benzenamine, N-phenyl-, reaction products with 2,4,4-trimethylpentene	270-128-1	#N/A	#N/A	#N/A	270-128-1	#REF!	This substance is Persistent, Bioaccumulative and Toxic. It has been found in sediment, water, fish, seabirds and other biota.	0	#N/A	#N/A	#N/A	#N/A	#N/A	#N/A	Suspected PBT/vPvB#Exposure of environment#High (aggregated) tonnage#Wide dispersive use	#N/A		0.7	0.7	0	0	0	0	0	0	0	0	0	1.4														0.5	0.7
68610-51-5	271-867-2	271-867-2	Phenol, 4-methyl-, reaction products with dicyclopentadiene and isobutylene	#N/A	#N/A	#N/A	#N/A	271-867-2	#REF!	#N/A	#N/A	#N/A	#N/A	#N/A	#N/A	#N/A	#N/A	Suspected PBT/vPvB#Exposure of environment#Wide dispersive use	#N/A		0.7	0.7	0	0	0	0	0	0	0	0	0	1.4														0.5	0.7
68919-76-6	272-902-4	272-902-4	Fatty acids, tall-oil, reaction products with 2-[(2-aminoethyl)amino]ethanol	#N/A	#N/A	#N/A	#N/A	272-902-4	#REF!	#N/A	#N/A	#N/A	#N/A	#N/A	#N/A	#N/A	#N/A	Suspected PBT/vPvB#Exposure of environment	#N/A		0.7	0.7	0	0	0	0	0	0	0	0	0	1.4														0.5	0.7
68938-03-4	273-110-1	273-110-1	Octene, hydroformylation products, low-boiling	#N/A	#N/A	#N/A	#N/A	273-110-1	#REF!	#N/A	#N/A	#N/A	#N/A	#N/A	#N/A	#N/A	#N/A	Suspected PBT/vPvB#Consumer use#High (aggregated) tonnage	#N/A		0.7	0.7	0	0	0	0	0	0	0	0	0	1.4														0.5	0.7
68953-84-4	273-227-8	273-227-8	1,4-Benzenediamine, N,N'-mixed phenyl and tolyl derivatives (BENPAT)	#N/A	#N/A	#N/A	#N/A	273-227-8	#REF!	#N/A	#N/A	#N/A	#N/A	#N/A	#N/A	#N/A	#N/A	Suspected PBT/vPvB#Consumer use#High (aggregated) tonnage#Wide dispersive use	#N/A		0.7	0.7	0	0	0	0	0	0	0	0	0	1.4														0.5	0.7
70356-09-1	274-581-6	274-581-6	1-[4-(1,1-dimethylethyl)phenyl]-3-(4-methoxyphenyl)propane-1,3-dione	#N/A	#N/A	#N/A	#N/A	274-581-6	#REF!	#N/A	#N/A	#N/A	#N/A	#N/A	#N/A	#N/A	#N/A	Suspected PBT/vPvB#Consumer use#Exposure of environment#High (aggregated) tonnage#Wide dispersive use	#N/A		0.7	0.7	0	0	0	0	0	0	0	0	0	1.4														0.5	0.7
84852-53-9	284-366-9	284-366-9	DBDPE	284-366-9	#N/A	#N/A	#N/A	284-366-9	#REF!	This substance has persistent, bioackumulative and toxic properties. The substance has been detected in environmental samples from various parts of the world and in wildlife including birds, dolphins and pandas. It has also been detected in hair from huma	Official classification missing	#N/A	#N/A	#N/A	#N/A	#N/A	#N/A	Suspected PBT/vPvB#High (aggregated) tonnage#Wide dispersive use	#N/A		0.7	0.7	0	0	0	0	0	0	0	0	0	1.4														0.5	0.7
84961-70-6	284-660-7	284-660-7	Benzene, mono-C10-13-alkyl derivs., distn. residues	#N/A	#N/A	#N/A	#N/A	284-660-7	#REF!	#N/A	#N/A	#N/A	#N/A	#N/A	#N/A	#N/A	#N/A	Consumer use#High (aggregated) tonnage#Suspected PBT/vPvB#Wide dispersive use	#N/A		0.7	0.7	0	0	0	0	0	0	0	0	0	1.4														0.5	0.7
101357-15-7	309-912-6	309-912-6	Benzenamine, reaction products with aniline hydrochloride and nitrobenzene	#N/A	#N/A	#N/A	#N/A	309-912-6	#REF!	#N/A	#N/A	#N/A	#N/A	#N/A	#N/A	#N/A	#N/A	Suspected PBT/vPvB	#N/A		0.7	0.7	0	0	0	0	0	0	0	0	0	1.4														0.5	0.7
255881-94-8	401-850-9	401-850-9	S-(tricyclo[5.2.1.0 2,6]deca-3-en-8(or 9)-yl) O-(isopropyl or isobutyl or 2-ethylhexyl) O-(isopropyl or isobutyl or 2-ethylhexyl)phosphorodithioate	#N/A	#N/A	#N/A	#N/A	401-850-9	#REF!	#N/A	#N/A	#N/A	#N/A	#N/A	#N/A	#N/A	#N/A	Exposure of environment#Suspected PBT/vPvB#Wide dispersive use	#N/A		0.7	0.7	0	0	0	0	0	0	0	0	0	1.4														0.5	0.7
137398-54-0	403-030-6	403-030-6	Reaction mass of O,O'-diisopropyl (pentathio)dithioformate and O,O'-diisopropyl (trithio)dithioformate and O,O'-diisopropyl (tetrathio)dithioformate	#N/A	#N/A	#N/A	#N/A	403-030-6	#REF!	#N/A	#N/A	#N/A	#N/A	#N/A	#N/A	#N/A	#N/A	Suspected PBT/vPvB	#N/A		0.7	0.7	0	0	0	0	0	0	0	0	0	1.4														0.5	0.7
115895-09-5	404-740-9	404-740-9	Ethyl 3,5-dichloro-4-hexadecyloxycarbonyloxybenzoate	#N/A	#N/A	#N/A	#N/A	404-740-9	#REF!	#N/A	#N/A	#N/A	#N/A	#N/A	#N/A	#N/A	#N/A	Suspected PBT/vPvB#Exposure of environment	#N/A		0.7	0.7	0	0	0	0	0	0	0	0	0	1.4														0.5	0.7
154702-15-5	421-450-8	421-450-8	bis(2-ethylhexyl) 4,4’-{6-[4-tert-butylcarbamoyl)anilino]-1,3,5-triazine-2,4-diyldiimino}dibenzoate	#N/A	#N/A	#N/A	#N/A	421-450-8	#REF!	#N/A	#N/A	#N/A	#N/A	#N/A	#N/A	#N/A	#N/A	Suspected PBT/vPvB#Exposure of environment#Wide dispersive use	#N/A		0.7	0.7	0	0	0	0	0	0	0	0	0	1.4														0.5	0.7
426218-78-2	422-040-1	422-040-1	a mixture of: 4-(2,2,3-trimethylcyclopent-3-en-1-yl)-1-methyl-2-oxabicyclo[2.2.2]octane; 1-(2,2,3-trimethylcyclopent-3-en-1-yl)-5-methyl-6-oxabicyclo[3.2.1]octane; spiro[cyclohex-3-en-1-yl-[(4,5,6,6a-tetrahydro-3,6',6',6'a-tetramethyl)-1,3'(3'aH)-[2H]cyclopenta[b]furan]; spiro[cyclohex-3-en-1-yl-[4,5,6,6a-tetrahydro-4,6',6',6'a-tetramethyl)-1,3'(3'aH)-[2H]cyclopenta[b]]furan]	#N/A	#N/A	#N/A	#N/A	422-040-1	#REF!	#N/A	#N/A	#N/A	#N/A	#N/A	#N/A	#N/A	#N/A	Suspected PBT/vPvB#Exposure of environment#High RCR	#N/A		0.7	0.7	0	0	0	0	0	0	0	0	0	1.4														0.5	0.7
797751-44-1	458-680-3	458-680-3	A mixture of: propan-2-one-O,O'(methoxyvinylsilandiyl)dioxime; propan-2-one-O-(dimethoxyvinylsilyl)oxime; propan-2-one-O,O',O''-(vinylsilantriyl)trioxime	#N/A	#N/A	#N/A	#N/A	458-680-3	#REF!	#N/A	#N/A	#N/A	#N/A	#N/A	#N/A	#N/A	#N/A	Suspected PBT/vPvB#Exposure of environment	#N/A		0.7	0.7	0	0	0	0	0	0	0	0	0	1.4														0.5	0.7
-	480-310-4	480-310-4	ammonium 2,2,3 trifluor-3-(1,1,2,2,3,3-hexafluoro-3-trifluormethoxypropoxy), propionate	#N/A	#N/A	#N/A	#N/A	480-310-4	#REF!	#N/A	#N/A	#N/A	#N/A	#N/A	#N/A	#N/A	#N/A	Suspected PBT/vPvB#Exposure of environment#Wide dispersive use	#N/A		0.7	0.7	0	0	0	0	0	0	0	0	0	1.4														0.5	0.7
-	-	484-450-7	-	#N/A	#N/A	#N/A	#N/A	484-450-7	#REF!	#N/A	#N/A	#N/A	#N/A	#N/A	#N/A	#N/A	#N/A	Suspected PBT/vPvB	#N/A		0.7	0.7	0	0	0	0	0	0	0	0	0	1.4														0.5	0.7
41637-38-1	609-946-4	609-946-4	Esterification products of 4,4'-isopropylidenediphenol, ethoxylated and 2-methylprop-2-enoic acid	#N/A	#N/A	#N/A	#N/A	609-946-4	#REF!	#N/A	#N/A	#N/A	#N/A	#N/A	#N/A	#N/A	#N/A	Suspected PBT/vPvB#Exposure of environment	#N/A		0.7	0.7	0	0	0	0	0	0	0	0	0	1.4														0.5	0.7
244235-47-0	627-083-1	627-083-1	1-(2-hydroxy-5-nonyl(branched)-phenyl)ethanone oxime	#N/A	#N/A	#N/A	#N/A	627-083-1	#REF!	#N/A	#N/A	#N/A	#N/A	#N/A	#N/A	#N/A	#N/A	Suspected PBT/vPvB#High (aggregated) tonnage	#N/A		0.7	0.7	0	0	0	0	0	0	0	0	0	1.4														0.5	0.7
1228186-18-2	629-767-5	629-767-5	N-[2-(piperazin-1-yl)ethyl]C18-insaturated-alkylamide	#N/A	#N/A	#N/A	#N/A	629-767-5	#REF!	#N/A	#N/A	#N/A	#N/A	#N/A	#N/A	#N/A	#N/A	Exposure of environment#Suspected PBT/vPvB#Wide dispersive use	#N/A		0.7	0.7	0	0	0	0	0	0	0	0	0	1.4														0.5	0.7
-	700-161-3	700-161-3	reaction mass of mixed (3,3,4,4,5,5,6,6,7,7,8,8,8-tridecafluorooctyl) phosphates, ammonium salt	#N/A	#N/A	#N/A	#N/A	700-161-3	#REF!	#N/A	#N/A	#N/A	#N/A	#N/A	#N/A	#N/A	#N/A	Suspected PBT/vPvB	#N/A		0.7	0.7	0	0	0	0	0	0	0	0	0	1.4														0.5	0.7
908020-52-0	700-323-3	700-323-3	ammonium difluoro[1,1,2,2-tetrafluoro-2-(pentafluoroethoxy)ethoxy]acetate	#N/A	#N/A	#N/A	#N/A	700-323-3	#REF!	#N/A	#N/A	#N/A	#N/A	#N/A	#N/A	#N/A	#N/A	Suspected PBT/vPvB#Exposure of environment	#N/A		0.7	0.7	0	0	0	0	0	0	0	0	0	1.4														0.5	0.7
-	700-403-8	700-403-8	Ammonium salts of mono- and bis[3,3,4,4,5,5,6,6,7,7,8,8,8-tridecafluorooctyl and/or poly (substituted alkene)] phosphate	#N/A	#N/A	#N/A	#N/A	700-403-8	#REF!	#N/A	#N/A	#N/A	#N/A	#N/A	#N/A	#N/A	#N/A	Suspected PBT/vPvB#Consumer use#Wide dispersive use	#N/A		0.7	0.7	0	0	0	0	0	0	0	0	0	1.4														0.5	0.7
-	700-427-9	700-427-9	Mono- and/or di- and/or tri(1-phenylethyl)-m-cresol and p-cresol	#N/A	#N/A	#N/A	#N/A	700-427-9	#REF!	#N/A	#N/A	#N/A	#N/A	#N/A	#N/A	#N/A	#N/A	Suspected PBT/vPvB#Consumer use#Wide dispersive use	#N/A		0.7	0.7	0	0	0	0	0	0	0	0	0	1.4														0.5	0.7
-	700-579-6	700-579-6	Sepisol Fast Blue 85219	#N/A	#N/A	#N/A	#N/A	700-579-6	#REF!	#N/A	#N/A	#N/A	#N/A	#N/A	#N/A	#N/A	#N/A	Suspected PBT/vPvB#Wide dispersive use	#N/A		0.7	0.7	0	0	0	0	0	0	0	0	0	1.4														0.5	0.7
947701-81-7	700-604-0	700-604-0	10-undecenyl 2-cyano-3,3-diphenylpropenoate	#N/A	#N/A	#N/A	#N/A	700-604-0	#REF!	#N/A	#N/A	#N/A	#N/A	#N/A	#N/A	#N/A	#N/A	Suspected PBT/vPvB#Consumer use	#N/A		0.7	0.7	0	0	0	0	0	0	0	0	0	1.4														0.5	0.7
-	700-992-1	700-992-1	C16-(branched), C20-(branched) and C24-(branched)-alkanes	#N/A	#N/A	#N/A	#N/A	700-992-1	#REF!	#N/A	#N/A	#N/A	#N/A	#N/A	#N/A	#N/A	#N/A	Suspected PBT/vPvB#Consumer use#High (aggregated) tonnage#Wide dispersive use	#N/A		0.7	0.7	0	0	0	0	0	0	0	0	0	1.4														0.5	0.7
-	701-057-0	701-057-0	Hydrogenated rosin alcohols	#N/A	#N/A	#N/A	#N/A	701-057-0	#REF!	#N/A	#N/A	#N/A	#N/A	#N/A	#N/A	#N/A	#N/A	Suspected PBT/vPvB#Exposure of environment#High RCR#Wide dispersive use	#N/A		0.7	0.7	0	0	0	0	0	0	0	0	0	1.4														0.5	0.7
-	931-274-8	931-274-8	HDI oligomers, isocyanurate	#N/A	#N/A	#N/A	#N/A	931-274-8	#REF!	#N/A	#N/A	#N/A	#N/A	#N/A	#N/A	#N/A	#N/A	Suspected PBT/vPvB#High (aggregated) tonnage#Wide dispersive use	#N/A		0.7	0.7	0	0	0	0	0	0	0	0	0	1.4														0.5	0.7
-	931-745-8	931-745-8	Imidazolium compounds, 2-C17-unsatd.-alkyl-1-(2-C18-unsatd. amidoethyl)-4,5-dihydro-N-methyl, Me sulfates	#N/A	#N/A	#N/A	#N/A	931-745-8	#REF!	#N/A	#N/A	#N/A	#N/A	#N/A	#N/A	#N/A	#N/A	Suspected PBT/vPvB#Exposure of environment#High RCR	#N/A		0.7	0.7	0	0	0	0	0	0	0	0	0	1.4														0.5	0.7
85-68-7	201-622-7	201-622-7	Benzyl butyl phthalate, BBP	201-622-7	201-622-7	201-622-7	201-622-7	#N/A	#REF!	Classified CMR according to Annex VI of Regulation 1272/2008	Repr. 1B Aquatic Acute 1 Aquatic Chronic 1	H360Df H400 H410	H360Df H400 H410	H360Df H400 H410	Toxic for reproduction (Article 57c)#Endocrine disrupting properties (Article 57(f) - human health)	H360Df H400 H410	#N/A	#N/A	CAT1		0	0	1	3	0	0	1	1	1	0	0	6														1	6
84-66-2	201-550-6	201-550-6	diethyl phthalate (DEP)	201-550-6	#N/A	#N/A	#N/A	201-550-6	#REF!	Diethyl phthalate (DEP) is an endocrine disruptor with thyroid and estrogenic activity, affecting several body functions and target organs including reproduction, liver and metabolism. The substance has been found in biomonitoring studies and in human uri	Official classification missing - 57f substance	#N/A	#N/A	#N/A	#N/A	#N/A	#N/A	CMR#Potential endocrine disruptor#Consumer use#High (aggregated) tonnage#Wide dispersive use	CAT1		0	0	0	3	0	0	0	1	1	0	0	5														0.5	2.5
84-74-2	201-557-4	201-557-4	Dibutyl phthalate, DBP	201-557-4	201-557-4	201-557-4	201-557-4	#N/A	#REF!	Classified CMR according to Annex VI of Regulation 1272/2008	Repr. 1B Aquatic Acute 1	H360Df H400	H360Df H400	H360Df H400	Toxic for reproduction (Article 57c)#Endocrine disrupting properties (Article 57(f) - human health)	H360Df H400	#N/A	#N/A	CAT1		0	0	0	3	0	0	1	1	1	0	0	5														1	5
96-12-8	202-479-3	202-479-3	1,2-dibromo-3-chloropropane	202-479-3	#N/A	#N/A	#N/A	#N/A	#REF!	Classified CMR (Class I & II) according to Annex 1 of Directive 67/548/EEC	Carc. 1B Muta. 1B Repr. 1A Acute Tox. 3 * STOT RE 2 * Aquatic Chronic 3	H350 H340 H360F *** H301 H373 ** H412	#N/A	#N/A	#N/A	#N/A	#N/A	#N/A	CAT1		0	0	1	3	1	1	1	0	1	0	0	5														0.3	1.5
106-93-4	203-444-5	203-444-5	1,2-dibromoethane	203-444-5	#N/A	#N/A	#N/A	#N/A	#REF!	Classified CMR according to Annex VI of Regulation 1272/2008	Carc. 1B Acute Tox. 3 * Acute Tox. 3 * Acute Tox. 3 * Eye Irrit. 2 STOT SE 3 Skin Irrit. 2 Aquatic Chronic 2	H350 H331 H311 H301 H319 H335 H315 H411	#N/A	#N/A	#N/A	#N/A	#N/A	#N/A	CAT1		0	0	1	3	1	0	0	0	1	0	0	5														0.3	1.5
117-81-7	204-211-0	204-211-0	DEHP; Bis(2-ethylhexyl) phthalate	204-211-0	204-211-0	204-211-0	204-211-0	#N/A	#REF!	Classified CMR according to Annex VI of Regulation 1272/2008	Repr. 1B	H360FD	H360FD	H360FD	Toxic for reproduction (Article 57c)#Endocrine disrupting properties (Article 57(f) - environment)#Endocrine disrupting properties (Article 57(f) - human health)	H360FD	#N/A	#N/A	CAT1		0	0	0	3	0	0	1	1	1	0	0	5														1	5
118-74-1	204-273-9	204-273-9	Hexachlorobenzene	204-273-9	#N/A	#N/A	#N/A	#N/A	#REF!	Classified CMR according to Annex VI of Regulation 1272/2008	Carc. 1B STOT RE 1 Aquatic Acute 1 Aquatic Chronic 1	H350 H372 ** H400 H410	#N/A	#N/A	#N/A	#N/A	#N/A	#N/A	CAT1		0	0	1	3	1	0	0	0	1	0	0	5														0.3	1.5
65277-42-1	265-667-4	265-667-4	1-[4-[4-[[(2SR,4RS)-2-(2,4-dichlorophenyl)-2-(imidazol-1-ylmethyl)-1,3-dioxolan-4-yl]methoxy]phenyl]piperazin-1-yl]ethanoneketoconazole	265-667-4	#N/A	#N/A	#N/A	#N/A	#REF!	Classified CMR according to Annex VI of Regulation 1272/2008	Repr. 1B Acute Tox. 3 * STOT RE 2 * Aquatic Acute 1 Aquatic Chronic 1	H360F*** H301 H373** H400 H410	#N/A	#N/A	#N/A	#N/A	#N/A	#N/A	CAT1		0	0	1	3	0	0	1	0	1	0	0	5														0.3	1.5
149-30-4	205-736-8	205-736-8	Benzothiazole-2-thiol	#N/A	#N/A	#N/A	#N/A	205-736-8	#REF!	#N/A	#N/A	#N/A	#N/A	#N/A	#N/A	#N/A	H317 H400 H410	CMR#Sensitiser#Consumer use#Exposure of sensitive populations#High (aggregated) tonnage#Wide dispersive use	#N/A		0	0	1	3	0	0	0	0	0	0.6	0	4.6														0.5	2.3
84-69-5	201-553-2	201-553-2	diisobutyl phthalate	201-553-2	#N/A	201-553-2	201-553-2	#N/A	#REF!	Classified CMR according to Annex VI of Regulation 1272/2008	Repr. 1B	H360Df	#N/A	H360Df	Toxic for reproduction (Article 57c)#Endocrine disrupting properties (Article 57(f) - human health)	H360Df	#N/A	#N/A	CAT2		0	0	0	3	0	0	1	1	0.5	0	0	4.5														1	4.5
121158-58-5	310-154-3	310-154-3	phenol, dodecyl-, branched	310-154-3	#N/A	#N/A	#N/A	310-154-3	#REF!	Substance is agreed by RAC to be a classified CMR according to Annex VI of Regulation 1272/2008, however it is not yet formally included.	Repr. 1B Skin Corr. 1C Eye Dam. 1 Aquatic Acute 1 Aquatic Chronic 1	H360F H314 H318 H400 H410	#N/A	#N/A	#N/A	#N/A	H360F H314 H318 H400 H410	Potential endocrine disruptor	#N/A		0	0	1	3	0	0	1	0	0.5	0	0	4.5														0.5	2.25
6807-17-6	401-720-1	401-720-1	4,4-isobutylethylidenediphenol	401-720-1	#N/A	401-720-1	#N/A	#N/A	#REF!	Classified CMR according to Annex VI of Regulation 1272/2008	Repr. 1B Eye Irrit. 2 Aquatic Acute 1 Aquatic Chronic 1	H360F *** H319 H400 H410	#N/A	H360F *** H319 H400 H410	Toxic for reproduction (Article 57c)	#N/A	#N/A	#N/A	CAT2		0	0	1	3	0	0	1	0	0.5	0	0	4.5														1	4.5
110-54-3	203-777-6	203-777-6	Hexane	203-777-6	#N/A	#N/A	#N/A	203-777-6	#REF!	Hexane is classified as possible reprotoxic chemical (R 3) and has been reported to have endocrine and neurological effects.	Flam. Liq. 2 Repr. 2 Asp. Tox. 1 STOT RE 2 * Skin Irrit. 2 STOT SE 3 Aquatic Chronic 2	H225 H361f *** H304 H373 ** H315 H336 H411	#N/A	#N/A	#N/A	#N/A	H225 H361f *** H304 H336 H373 ** H315 H411	CMR#Other hazard based concern#High (aggregated) tonnage#Wide dispersive use	#N/A		0	0	1	3	0	0	1	0	0	0.4	0	4.4														0.5	2.2
60207-90-1	-	-	Propiconazole	60207-90-1	#N/A	#N/A	#N/A	#N/A	60207-90-1	Classified CMR according to Annex VI of Regulation 1272/2008	Repr. 1B_x000D_ Acute Tox. 4_x000D_ Skin Sens. 1_x000D_ Aquatic Acute 1_x000D_ Aquatic Chronic 1	H360D_x000D_ H302_x000D_ H317_x000D_ H400_x000D_ H410	#N/A	#N/A	#N/A	#N/A	#N/A	#N/A	CAT3b		0	0	1	3	0	0	1	0	0.3	0	0	4.3														0.3	1.29
88-85-7	201-861-7	201-861-7	Dinoseb	201-861-7	#N/A	201-861-7	#N/A	#N/A	#REF!	Classified CMR according to Annex VI of Regulation 1272/2008	Repr. 1B Acute Tox. 3 * Acute Tox. 3 * Eye Irrit. 2 Aquatic Acute 1 Aquatic Chronic 1	H360Df H311 H301 H319 H400 H410	#N/A	H360Df H311 H301 H319 H400 H410	Toxic for reproduction (Article 57c)	#N/A	#N/A	#N/A	CAT3b		0	0	1	3	0	0	1	0	0.3	0	0	4.3														1	4.3
106-47-8	203-401-0	203-401-0	4-chloroaniline	203-401-0	#N/A	#N/A	#N/A	#N/A	#REF!	Classified CMR according to Annex VI of Regulation 1272/2008	Carc. 1B Acute Tox. 3 * Acute Tox. 3 * Acute Tox. 3 * Skin Sens. 1 Aquatic Acute 1 Aquatic Chronic 1	H350 H331 H311 H301 H317 H400 H410	#N/A	#N/A	#N/A	#N/A	#N/A	#N/A	CAT3b		0	0	1	3	1	0	0	0	0.3	0	0	4.3														0.3	1.29
101-02-0	202-908-4	202-908-4	Triphenyl phosphite	#N/A	#N/A	#N/A	#N/A	202-908-4	#REF!	#N/A	#N/A	#N/A	#N/A	#N/A	#N/A	#N/A	H315 H319 H400 H410	Suspected CMR#Potential endocrine disruptor#Sensitiser#Consumer use#High (aggregated) tonnage#Wide dispersive use	#N/A		0	0	1	2.1	0	0	0	0	0.5	0.6	0	4.2														0.5	2.1
148477-71-8	-	-	spirodiclofen (ISO)	148477-71-8	#N/A	#N/A	#N/A	#N/A	#N/A	Classified CMR according to Annex VI of Regulation 1272/2008	Carc. 1B_x000D_ Repr. 2_x000D_ STOT RE 2_x000D_ Skin Sens. 1B_x000D_ Aquatic Chronic 1	H350_x000D_ H361f_x000D_ H373_x000D_ H317_x000D_ H410	#N/A	#N/A	#N/A	#N/A	#N/A	#N/A	#N/A		0	0	1	3	1	0	1	0	0	0	0	4														0.3	1.2
210555-94-5	-	-	phenol, 4-dodecyl-, branched	210555-94-5	#N/A	#N/A	#N/A	#N/A	#N/A	Substance is agreed by RAC to be a classified CMR according to Annex VI of Regulation 1272/2008, however it is not yet formally included.	Repr. 1B Skin Corr. 1C Eye Dam. 1 Aquatic Acute 1 Aquatic Chronic 1	H360F H314 H318 H400 H410	#N/A	#N/A	#N/A	#N/A	#N/A	#N/A	#N/A		0	0	1	3	0	0	1	0	0	0	0	4														0.3	1.2
21436-97-5	-	-	2,4,5-trimethylaniline hydrochloride	21436-97-5	#N/A	#N/A	#N/A	#N/A	#N/A	Classified CMR according to Annex VI of Regulation 1272/2008	Carc. 1B Acute Tox. 3 * Acute Tox. 3 * Acute Tox. 3 * Aquatic Chronic 2	H350 H331 H311 H301 H411	#N/A	#N/A	#N/A	#N/A	#N/A	#N/A	#N/A		0	0	1	3	1	0	0	0	0	0	0	4														0.3	1.2
540-73-8	-	-	1,2-dimethylhydrazine	540-73-8	#N/A	#N/A	#N/A	#N/A	#N/A	Classified CMR according to Annex VI of Regulation 1272/2008	Carc. 1B Acute Tox. 3 * Acute Tox. 3 * Acute Tox. 3 * Aquatic Chronic 2	H350 H331 H311 H301 H411	#N/A	#N/A	#N/A	#N/A	#N/A	#N/A	#N/A		0	0	1	3	1	0	0	0	0	0	0	4														0.3	1.2
68049-83-2	-	-	Azafenidin	68049-83-2	#N/A	#N/A	#N/A	#N/A	#N/A	Classified CMR according to Annex VI of Regulation 1272/2008	Repr. 1B STOT RE 2 * Aquatic Acute 1 Aquatic Chronic 1	H360Df H373 ** H400 H410	#N/A	#N/A	#N/A	#N/A	#N/A	#N/A	#N/A		0	0	1	3	0	0	1	0	0	0	0	4														0.3	1.2
74499-35-7	-	-	phenol, (tetrapropenyl) derivatives	74499-35-7	#N/A	#N/A	#N/A	#N/A	#N/A	Substance is agreed by RAC to be a classified CMR according to Annex VI of Regulation 1272/2008, however it is not yet formally included.	Repr. 1B Skin Corr. 1C Eye Dam. 1 Aquatic Acute 1 Aquatic Chronic 1	H360F H314 H318 H400 H410	#N/A	#N/A	#N/A	#N/A	#N/A	#N/A	#N/A		0	0	1	3	0	0	1	0	0	0	0	4														0.3	1.2
7803-57-8	-	-	Hydrazine hydrate(s)	7803-57-8	#N/A	#N/A	#N/A	#N/A	#N/A	Classified CMR according to Annex VI of Regulation 1272/2008	Flam. Liq. 3 Carc. 1B Acute Tox. 3 * Acute Tox. 3 * Acute Tox. 3 * Skin Corr. 1B Skin Sens. 1 Aquatic Acute 1 Aquatic Chronic 1	H226 H350 H331 H311 H301 H314 H317 H400 H410	#N/A	#N/A	#N/A	#N/A	#N/A	#N/A	#N/A		0	0	1	3	1	0	0	0	0	0	0	4														0.3	1.2
NoCas1	-	-	reaction products of paraformaldehyde and 2- hydroxypropylamine (ratio 3:2);[formaldehyde released from 3,3'-methylenebis[5- methyloxazolidine] formaldehyde released from oxazolidin];[MBO]	NoCas1	#N/A	#N/A	#N/A	#N/A	#N/A	Substance is agreed by RAC to be a classified CMR according to Annex VI of Regulation 1272/2008, however it is not yet formally included.	Carc. 1B Muta. 2Acute Tox. 4Acute Tox. 4STOT RE 2Skin Corr. 1C Eye Dam. 1 Skin Sens. 1AAquatic Chronic 2	H350 H341 H332 H311 H302 H373(gastrointestin al tract, respiratory tract)H314 H318 H317 H411	#N/A	#N/A	#N/A	#N/A	#N/A	#N/A	#N/A		0	0	1	3	1	1	0	0	0	0	0	4														0.3	1.2
NoCas2	-	-	reaction products of paraformaldehyde with 2- hydroxypropylamine (ratio 1:1);[formaldehyde released from a,a,a-trimethyl-1,3,5-triazine- 1,3,5(2H,4H,6H)-triethanol];[HPT]	NoCas2	#N/A	#N/A	#N/A	#N/A	#N/A	Substance is agreed by RAC to be a classified CMR according to Annex VI of Regulation 1272/2008, however it is not yet formally included.	Carc. 1B Muta. 2Acute Tox. 4Acute Tox. 4STOT RE 2Skin Corr. 1C Eye Dam. 1 Skin Sens. 1AAquatic Chronic 2	H350 H341 H332 H302 H373(gastrointestin al tract, respiratory tract) H314 H318 H317 H411	#N/A	#N/A	#N/A	#N/A	#N/A	#N/A	#N/A		0	0	1	3	1	1	0	0	0	0	0	4														0.3	1.2
53-70-3	200-181-8	200-181-8	Dibenz[a,h]anthracene	200-181-8	#N/A	#N/A	#N/A	#N/A	#REF!	Classified CMR according to Annex VI of Regulation 1272/2008	Carc. 1B Aquatic Acute 1 Aquatic Chronic 1	H350 H400 H410	#N/A	#N/A	#N/A	#N/A	#N/A	#N/A	#N/A		0	0	1	3	1	0	0	0	0	0	0	4														0.3	1.2
56-23-5	200-262-8	200-262-8	Carbon tetrachloride	200-262-8	#N/A	#N/A	#N/A	200-262-8	#REF!	This substance is Persistent, Mobile and Toxic. It has been detected in ground and surface waters.	Acute Tox. 3_x000D_ Acute Tox. 3_x000D_ Carc. 2_x000D_ STOT RE 1_x000D_ Aquatic Chronic 3_x000D_ Ozone 1	H301_x000D_ H311_x000D_ H331_x000D_ H351_x000D_ H372_x000D_ H412_x000D_ H420	#N/A	#N/A	#N/A	#N/A	H351 H331 H311 H301 H372 ** H412 H420	CMR#Exposure of workers#High (aggregated) tonnage	#N/A		0	0	1	3	1	0	0	0	0	0	0	4														0.5	2
57-14-7	200-316-0	200-316-0	N,N-dimethylhydrazine	200-316-0	#N/A	#N/A	#N/A	#N/A	#REF!	Classified CMR according to Annex VI of Regulation 1272/2008	Flam. Liq. 2 Carc. 1B Acute Tox. 3 * Acute Tox. 3 * Skin Corr. 1B Aquatic Chronic 2	H225 H350 H331 H301 H314 H411	#N/A	#N/A	#N/A	#N/A	#N/A	#N/A	#N/A		0	0	1	3	1	0	0	0	0	0	0	4														0.3	1.2
60-09-3	200-453-6	200-453-6	4-aminoazobenzene	200-453-6	#N/A	200-453-6	#N/A	#N/A	#REF!	Classified CMR (Class I & II) according to Annex 1 of Directive 67/548/EEC	Carc. 1B Aquatic Acute 1 Aquatic Chronic 1	H350 H400 H410	#N/A	H350 H400 H410	Carcinogenic (Article 57a)	#N/A	#N/A	#N/A	#N/A		0	0	1	3	1	0	0	0	0	0	0	4														1	4
62-55-5	200-541-4	200-541-4	Thioacetamide	200-541-4	#N/A	#N/A	#N/A	#N/A	#REF!	Classified CMR according to Annex VI of Regulation 1272/2008	Carc. 1B Acute Tox. 4 * Eye Irrit. 2 Skin Irrit. 2 Aquatic Chronic 3	H350 H302 H319 H315 H412	#N/A	#N/A	#N/A	#N/A	#N/A	#N/A	#N/A		0	0	1	3	1	0	0	0	0	0	0	4														0.3	1.2
62-75-9	200-549-8	200-549-8	Dimethylnitrosoamine	200-549-8	#N/A	#N/A	#N/A	#N/A	#REF!	Classified CMR according to Annex VI of Regulation 1272/2008	Carc. 1B Acute Tox. 2 * Acute Tox. 3 * STOT RE 1 Aquatic Chronic 2	H350 H330 H301 H372 ** H411	#N/A	#N/A	#N/A	#N/A	#N/A	#N/A	#N/A		0	0	1	3	1	0	0	0	0	0	0	4														0.3	1.2
66-81-9	200-636-0	200-636-0	Cicloheximide	200-636-0	#N/A	#N/A	#N/A	#N/A	#REF!	Classified CMR according to Annex VI of Regulation 1272/2008	Muta. 2 Repr. 1B Acute Tox. 2 * Aquatic Chronic 2	H341 H360D *** H300 H411	#N/A	#N/A	#N/A	#N/A	#N/A	#N/A	#N/A		0	0	1	3	0	1	1	0	0	0	0	4														0.3	1.2
70-25-7	200-730-1	200-730-1	1-methyl-3-nitro-1-nitrosoguanidine	200-730-1	#N/A	#N/A	#N/A	#N/A	#REF!	Classified CMR according to Annex VI of Regulation 1272/2008	Carc. 1B Acute Tox. 4 * Eye Irrit. 2 Skin Irrit. 2 Aquatic Chronic 2	H350 H332 H319 H315 H411	#N/A	#N/A	#N/A	#N/A	#N/A	#N/A	#N/A		0	0	1	3	1	0	0	0	0	0	0	4														0.3	1.2
75-55-8	200-878-7	200-878-7	2-methylaziridine	200-878-7	#N/A	#N/A	#N/A	#N/A	#REF!	Classified CMR according to Annex VI of Regulation 1272/2008	Flam. Liq. 2 Carc. 1B Acute Tox. 2 * Acute Tox. 1 Acute Tox. 2 * Eye Dam. 1 Aquatic Chronic 2	H225 H350 H330 H310 H300 H318 H411	#N/A	#N/A	#N/A	#N/A	#N/A	#N/A	#N/A		0	0	1	3	1	0	0	0	0	0	0	4														0.3	1.2
77-09-8	201-004-7	201-004-7	phenolphthalein	201-004-7	#N/A	201-004-7	#N/A	#N/A	#REF!	Classified CMR according to Annex VI of Regulation 1272/2008	Carc. 1B Muta. 2 Repr. 2	H350 H341 H361f***	#N/A	H350 H341 H361f ***	Carcinogenic (Article 57a)	#N/A	#N/A	#N/A	CAT1		0	0	0	3	1	1	1	0	1	0	0	4														1	4
78-79-5	201-143-3	201-143-3	Isoprene	201-143-3	#N/A	#N/A	#N/A	#N/A	#REF!	Classified CMR according to Annex VI of Regulation 1272/2008	Flam. Liq. 1 Carc. 1B Muta. 2 Aquatic Chronic 3	H224 H350 H341 H412	#N/A	#N/A	#N/A	#N/A	#N/A	#N/A	#N/A		0	0	1	3	1	1	0	0	0	0	0	4														0.3	1.2
79-01-6	201-167-4	201-167-4	Trichloroethylene	201-167-4	#N/A	201-167-4	201-167-4	#N/A	#REF!	Classified CMR (Class I & II) according to Annex 1 of Directive 67/548/EEC	Carc. 1B Muta. 2 Eye Irrit. 2 Skin Irrit. 2 STOT SE 3 Aquatic Chronic 3	H350 H341 H319 H315 H336 H412	#N/A	H350 H341 H336 H315 H319 H412	Carcinogenic (Article 57a)	H350 H341 H336 H315 H319 H412	#N/A	#N/A	#N/A		0	0	1	3	1	1	0	0	0	0	0	4														1	4
81-81-2	201-377-6	201-377-6	Warfarin	201-377-6	#N/A	#N/A	#N/A	#N/A	#REF!	Classified CMR according to Annex VI of Regulation 1272/2008	Repr. 1A STOT RE 1 Aquatic Chronic 3	H360D *** H372 ** H412	#N/A	#N/A	#N/A	#N/A	#N/A	#N/A	#N/A		0	0	1	3	0	0	1	0	0	0	0	4														0.3	1.2
88-72-2	201-853-3	201-853-3	2-nitrotoluene	201-853-3	#N/A	#N/A	#N/A	#N/A	#REF!	Classified CMR according to Annex VI of Regulation 1272/2008	Carc. 1B Muta. 1B Repr. 2 Acute Tox. 4 * Aquatic Chronic 2	H350 H340 H361f *** H302 H411	#N/A	#N/A	#N/A	#N/A	#N/A	#N/A	#N/A		0	0	1	3	1	1	1	0	0	0	0	4														0.3	1.2
91-22-5	202-051-6	202-051-6	quinoline	202-051-6	#N/A	#N/A	#N/A	#N/A	#REF!	Classified CMR according to Annex VI of Regulation 1272/2008	Carc. 1B Muta. 2 Acute Tox. 4 * Acute Tox. 4 * Eye Irrit. 2 Skin Irrit. 2 Aquatic Chronic 2	H350 H341 H312 H302 H319 H315 H411	#N/A	#N/A	#N/A	#N/A	#N/A	#N/A	#N/A		0	0	1	3	1	1	0	0	0	0	0	4														0.3	1.2
91-59-8	202-080-4	202-080-4	2-naphthylamine	202-080-4	202-080-4	#N/A	#N/A	#N/A	#REF!	Classified CMR according to Annex VI of Regulation 1272/2008	Carc. 1A Acute Tox. 4 * Aquatic Chronic 2	H350 H302 H411	H350 H302 H411	#N/A	#N/A	#N/A	#N/A	#N/A	#N/A		0	0	1	3	1	0	0	0	0	0	0	4														1	4
91-94-1	202-109-0	202-109-0	3,3'-dichlorobenzidine	202-109-0	#N/A	#N/A	#N/A	#N/A	#REF!	Classified CMR according to Annex VI of Regulation 1272/2008	Carc. 1B Acute Tox. 4 * Skin Sens. 1 Aquatic Acute 1 Aquatic Chronic 1	H350 H312 H317 H400 H410	#N/A	#N/A	#N/A	#N/A	#N/A	#N/A	#N/A		0	0	1	3	1	0	0	0	0	0	0	4														0.3	1.2
92-87-5	202-199-1	202-199-1	Benzidine and its salts	202-199-1	202-199-1	#N/A	#N/A	#N/A	#REF!	Classified CMR according to Annex VI of Regulation 1272/2008	Carc. 1A Acute Tox. 4 * Aquatic Acute 1 Aquatic Chronic 1	H350 H302 H400 H410	H350 H302 H400 H410	#N/A	#N/A	#N/A	#N/A	#N/A	#N/A		0	0	1	3	1	0	0	0	0	0	0	4														1	4
92-93-3	202-204-7	202-204-7	4-nitrobiphenyl	202-204-7	202-204-7	#N/A	#N/A	#N/A	#REF!	Classified CMR according to Annex VI of Regulation 1272/2008	Carc. 1B Aquatic Chronic 2	H350 H411	H350 H411	#N/A	#N/A	#N/A	#N/A	#N/A	#N/A		0	0	1	3	1	0	0	0	0	0	0	4														1	4
95-69-2	202-441-6	202-441-6	4-chloro-o-toluidine	202-441-6	#N/A	#N/A	#N/A	#N/A	#REF!	Classified CMR according to Annex VI of Regulation 1272/2008	Carc. 1B Muta. 2 Acute Tox. 3 * Acute Tox. 3 * Acute Tox. 3 * Aquatic Acute 1 Aquatic Chronic 1	H350 H341 H331 H311 H301 H400 H410	#N/A	#N/A	#N/A	#N/A	#N/A	#N/A	#N/A		0	0	1	3	1	1	0	0	0	0	0	4														0.3	1.2
95-80-7	202-453-1	202-453-1	4-methyl-m-phenylenediamine	202-453-1	#N/A	202-453-1	#N/A	#N/A	#REF!	Classified CMR according to Annex VI of Regulation 1272/2008	Carc. 1B Muta. 2 Repr. 2 Acute Tox. 3 * Acute Tox. 4 * STOT RE 2 * Skin Sens. 1 Aquatic Chronic 2	H350 H341 H361f*** H301 H312 H373** H317 H411	#N/A	H350 H341 H361f *** H301 H312 H373 ** H317 H411	Carcinogenic (Article 57a)	#N/A	#N/A	#N/A	#N/A		0	0	1	3	1	1	1	0	0	0	0	4														1	4
96-13-9	202-480-9	202-480-9	2,3-dibromopropan-1-ol	202-480-9	#N/A	#N/A	#N/A	#N/A	#REF!	Classified CMR according to Annex VI of Regulation 1272/2008	Carc. 1B Repr. 2 Acute Tox. 3 * Acute Tox. 4 * Acute Tox. 4 * Aquatic Chronic 3	H350 H361f *** H311 H332 H302 H412	#N/A	#N/A	#N/A	#N/A	#N/A	#N/A	#N/A		0	0	1	3	1	0	1	0	0	0	0	4														0.3	1.2
96-18-4	202-486-1	202-486-1	1,2,3-trichloropropane	202-486-1	#N/A	202-486-1	#N/A	#N/A	#REF!	Classified CMR according to Annex VI of Regulation 1272/2008	Carc. 1B Repr. 1B Acute Tox. 4 * Acute Tox. 4 * Acute Tox. 4 *	H350 H360F *** H332 H312 H302	#N/A	H310 H300 H400 H410	Carcinogenic (Article 57a)#Toxic for reproduction (Article 57c)	#N/A	#N/A	#N/A	#N/A		0	0	1	3	1	0	1	0	0	0	0	4														1	4
96-45-7	202-506-9	202-506-9	Ethylene thiourea	202-506-9	#N/A	202-506-9	#N/A	#N/A	#REF!	Classified CMR according to Annex VI of Regulation 1272/2008	Repr. 1B Acute Tox. 4 *	H360D *** H302	#N/A	H360D *** H302	Toxic for reproduction (Article 57c)	#N/A	#N/A	#N/A	CAT1		0	0	0	3	0	0	1	0	1	0	0	4														1	4
98-95-3	202-716-0	202-716-0	nitrobenzene	202-716-0	#N/A	202-716-0	#N/A	#N/A	#REF!	Classified CMR according to Annex VI of Regulation 1272/2008	Acute Tox. 3 Carc. 2 STOT RE 1 Repr. 1B Aquatic Chronic 3	H301 H311 H331 H351 H372 H360F H412	#N/A	H351 H360F H331 H311 H301 H372 H412	Toxic for reproduction (Article 57c)	#N/A	#N/A	#N/A	#N/A		0	0	1	3	1	0	1	0	0	0	0	4														1	4
99-76-3	202-785-7	202-785-7	Methyl 4-hydroxybenzoate	#N/A	#N/A	#N/A	#N/A	202-785-7	#REF!	#N/A	#N/A	#N/A	#N/A	#N/A	#N/A	#N/A	#N/A	CMR#Potential endocrine disruptor#Consumer use#Exposure of sensitive populations#High (aggregated) tonnage#Wide dispersive use	CAT1		0	0	0	3	0	0	0	0	1	0	0	4														0.5	2
101-14-4	202-918-9	202-918-9	4,4'-methylenebis[2-chloroaniline]	202-918-9	#N/A	202-918-9	202-918-9	#N/A	#REF!	Classified CMR according to Annex VI of Regulation 1272/2008	Carc. 1B Acute Tox. 4 * Aquatic Acute 1 Aquatic Chronic 1	H350 H302 H400 H410	#N/A	H350 H302 H400 H410	Carcinogenic (Article 57a)	H350 H302 H400 H410	#N/A	#N/A	#N/A		0	0	1	3	1	0	0	0	0	0	0	4														1	4
101-61-1	202-959-2	202-959-2	N,N,N',N'-tetramethyl-4,4'-methylenedianiline	202-959-2	#N/A	202-959-2	#N/A	#N/A	#REF!	Classified CMR according to Annex VI of Regulation 1272/2008	Carc. 1B Aquatic Acute 1 Aquatic Chronic 1	H350 H400 H410	#N/A	H350 H400 H410	Carcinogenic (Article 57a)	#N/A	#N/A	#N/A	#N/A		0	0	1	3	1	0	0	0	0	0	0	4														1	4
101-77-9	202-974-4	202-974-4	4,4'-methylenedianiline, MDA	202-974-4	#N/A	202-974-4	202-974-4	#N/A	#REF!	Classified CMR according to Annex VI of Regulation 1272/2008	Carc. 1B Muta. 2 STOT SE 1 STOT RE 2 * Skin Sens. 1 Aquatic Chronic 2	H350 H341 H370 ** H373 ** H317 H411	#N/A	H350 H341 H370 ** H373 ** H317 H411	Carcinogenic (Article 57a)	H350 H341 H370 ** H373 ** H317 H411	#N/A	#N/A	#N/A		0	0	1	3	1	1	0	0	0	0	0	4														1	4
101-80-4	202-977-0	202-977-0	4,4'-oxydianiline	202-977-0	#N/A	202-977-0	#N/A	#N/A	#REF!	Classified CMR according to Annex VI of Regulation 1272/2008	Carc. 1B Muta. 1B Repr. 2 Acute Tox. 3 * Acute Tox. 3 * Acute Tox. 3 * Aquatic Chronic 2	H350 H340 H361f *** H331 H311 H301 H411	#N/A	H350 H340 H361f *** H331 H311 H301 H411	Carcinogenic (Article 57a)#Mutagenic (Article 57b)	#N/A	#N/A	#N/A	#N/A		0	0	1	3	1	1	1	0	0	0	0	4														1	4
102-06-7	203-002-1	203-002-1	1,3-diphenylguanidine	#N/A	#N/A	#N/A	#N/A	203-002-1	#REF!	#N/A	#N/A	#N/A	#N/A	#N/A	#N/A	#N/A	H361f *** H302 H335 H315 H319 H411	CMR#High (aggregated) tonnage#High RCR	#N/A		0	0	1	3	0	0	1	0	0	0	0	4														0.5	2
103-33-3	203-102-5	203-102-5	Azobenzene	203-102-5	#N/A	#N/A	#N/A	#N/A	#REF!	Classified CMR according to Annex VI of Regulation 1272/2008	Carc. 1B Muta. 2 Acute Tox. 4 * Acute Tox. 4 * STOT RE 2 * Aquatic Acute 1 Aquatic Chronic 1	H350 H341 H332 H302 H373 ** H400 H410	#N/A	#N/A	#N/A	#N/A	#N/A	#N/A	#N/A		0	0	1	3	1	1	0	0	0	0	0	4														0.3	1.2
106-89-8	203-439-8	203-439-8	1-chloro-2,3-epoxypropane	203-439-8	#N/A	#N/A	#N/A	#N/A	#REF!	Classified CMR according to Annex VI of Regulation 1272/2008	Flam. Liq. 3 Carc. 1B Acute Tox. 3 * Acute Tox. 3 * Acute Tox. 3 * Skin Corr. 1B Skin Sens. 1	H226 H350 H331 H311 H301 H314 H317	#N/A	#N/A	#N/A	#N/A	#N/A	#N/A	CAT1		0	0	0	3	1	0	0	0	1	0	0	4														0.3	1.2
107-13-1	203-466-5	203-466-5	Acrylonitrile	203-466-5	#N/A	#N/A	#N/A	#N/A	#REF!	Classified CMR according to Annex VI of Regulation 1272/2008	Flam. Liq. 2 Carc. 1B Acute Tox. 3 * Acute Tox. 3 * Acute Tox. 3 * STOT SE 3 Skin Irrit. 2 Eye Dam. 1 Skin Sens. 1 Aquatic Chronic 2	H225 H350 H331 H311 H301 H335 H315 H318 H317 H411	#N/A	#N/A	#N/A	#N/A	#N/A	#N/A	#N/A		0	0	1	3	1	0	0	0	0	0	0	4														0.3	1.2
110-00-9	203-727-3	203-727-3	Furan	203-727-3	#N/A	203-727-3	#N/A	#N/A	#REF!	Classified CMR according to Annex VI of Regulation 1272/2008	Flam. Liq. 1 Carc. 1B Muta. 2 Acute Tox. 4 * Acute Tox. 4 * STOT RE 2 * Skin Irrit. 2 Aquatic Chronic 3	H224 H350 H341 H332 H302 H373 ** H315 H412	#N/A	H224 H350 H341 H332 H302 H373 ** H315 H412	Carcinogenic (Article 57a)	#N/A	#N/A	#N/A	#N/A		0	0	1	3	1	1	0	0	0	0	0	4														1	4
115-96-8	204-118-5	204-118-5	tris(2-chloroethyl)phosphate	204-118-5	#N/A	204-118-5	204-118-5	#N/A	#REF!	Classified CMR according to Annex VI of Regulation 1272/2008	Carc. 2 Repr. 1B Acute Tox. 4 * Aquatic Chronic 2	H351 H360F*** H302 H411	#N/A	H351 H360F *** H302 H411	Toxic for reproduction (Article 57c)	H351 H360F *** H302 H411	#N/A	#N/A	#N/A		0	0	1	3	1	0	1	0	0	0	0	4														1	4
119-93-7	204-358-0	204-358-0	4,4'-bi-o-toluidine	204-358-0	#N/A	#N/A	#N/A	#N/A	#REF!	Classified CMR according to Annex VI of Regulation 1272/2008	Carc. 1B Acute Tox. 4 * Aquatic Chronic 2	H350 H302 H411	#N/A	#N/A	#N/A	#N/A	#N/A	#N/A	#N/A		0	0	1	3	1	0	0	0	0	0	0	4														0.3	1.2
121-14-2	204-450-0	204-450-0	2,4-dinitrotoluene	204-450-0	#N/A	204-450-0	204-450-0	#N/A	#REF!	Classified CMR according to Annex VI of Regulation 1272/2008	Carc. 1B Muta. 2 Repr. 2 Acute Tox. 3 * Acute Tox. 3 * Acute Tox. 3 * STOT RE 2 * Aquatic Acute 1 Aquatic Chronic 1	H350 H341 H361f*** H331 H311 H301 H373** H400 H410	#N/A	H350 H341 H361f *** H331 H311 H301 H373 ** H400 H410	Carcinogenic (Article 57a)	H350 H341 H361f *** H331 H311 H301 H373 ** H400 H410	#N/A	#N/A	#N/A		0	0	1	3	1	1	1	0	0	0	0	4														1	4
122-60-1	204-557-2	204-557-2	2,3-epoxypropyl phenyl ether	204-557-2	#N/A	#N/A	#N/A	#N/A	#REF!	Classified CMR according to Annex VI of Regulation 1272/2008	Carc. 1B Muta. 2 Acute Tox. 4 * STOT SE 3 Skin Irrit. 2 Skin Sens. 1 Aquatic Chronic 3	H350 H341 H332 H335 H315 H317 H412	#N/A	#N/A	#N/A	#N/A	#N/A	#N/A	#N/A		0	0	1	3	1	1	0	0	0	0	0	4														0.3	1.2
122-66-7	204-563-5	204-563-5	Hydrazobenzene	204-563-5	#N/A	#N/A	#N/A	#N/A	#REF!	Classified CMR according to Annex VI of Regulation 1272/2008	Carc. 1B Acute Tox. 4 * Aquatic Acute 1 Aquatic Chronic 1	H350 H302 H400 H410	#N/A	#N/A	#N/A	#N/A	#N/A	#N/A	#N/A		0	0	1	3	1	0	0	0	0	0	0	4														0.3	1.2
131-17-9	205-016-3	205-016-3	Diallyl phthalate	#N/A	#N/A	#N/A	#N/A	205-016-3	#REF!	#N/A	#N/A	#N/A	#N/A	#N/A	#N/A	#N/A	H302 H400 H410	CMR#Consumer use#Wide dispersive use	#N/A		0	0	1	3	0	0	0	0	0	0	0	4														0.5	2
131-18-0	205-017-9	205-017-9	Dipentyl phthalate	205-017-9	#N/A	205-017-9	205-017-9	#N/A	#REF!	Classified CMR according to Annex VI of Regulation 1272/2008	Repr. 1B Aquatic Acute 1	H360FD H400	#N/A	H360FD H400	Toxic for reproduction (Article 57c)	H360FD H400	#N/A	#N/A	CAT1		0	0	0	3	0	0	1	0	1	0	0	4														1	4
137-17-7	205-282-0	205-282-0	2,4,5-trimethylaniline	205-282-0	#N/A	#N/A	#N/A	#N/A	#REF!	Classified CMR according to Annex VI of Regulation 1272/2008	Carc. 1B Acute Tox. 3 * Acute Tox. 3 * Acute Tox. 3 * Aquatic Chronic 2	H350 H331 H311 H301 H411	#N/A	#N/A	#N/A	#N/A	#N/A	#N/A	#N/A		0	0	1	3	1	0	0	0	0	0	0	4														0.3	1.2
139-65-1	205-370-9	205-370-9	4,4'-thiodianiline	205-370-9	#N/A	#N/A	#N/A	#N/A	#REF!	Classified CMR according to Annex VI of Regulation 1272/2008	Carc. 1B Acute Tox. 4 * Aquatic Chronic 2	H350 H302 H411	#N/A	#N/A	#N/A	#N/A	#N/A	#N/A	#N/A		0	0	1	3	1	0	0	0	0	0	0	4														0.3	1.2
148-24-3	205-711-1	205-711-1	quinolin-8-ol;8-hydroxyquinoline	205-711-1	#N/A	#N/A	#N/A	#N/A	#REF!	Substance is agreed by RAC to be a classified CMR according to Annex VI of Regulation 1272/2008, however it is not yet formally included.	Repr. 1B Acute Tox. 3Eye Dam. 1Skin Sens. 1Aquatic Acute 1Aquatic Chronic 1	H360D H301 H318 H317 H400 H410	#N/A	#N/A	#N/A	#N/A	#N/A	#N/A	#N/A		0	0	1	3	0	0	1	0	0	0	0	4														0.3	1.2
151-56-4	205-793-9	205-793-9	Aziridine	205-793-9	#N/A	#N/A	#N/A	#N/A	#REF!	Classified CMR according to Annex VI of Regulation 1272/2008	Flam. Liq. 2 Carc. 1B Muta. 1B Acute Tox. 2 * Acute Tox. 1 Acute Tox. 2 * Skin Corr. 1B Aquatic Chronic 2	H225 H350 H340 H330 H310 H300 H314 H411	#N/A	#N/A	#N/A	#N/A	#N/A	#N/A	#N/A		0	0	1	3	1	1	0	0	0	0	0	4														0.3	1.2
192-97-2	205-892-7	205-892-7	Benzo[e]pyrene	205-892-7	#N/A	#N/A	#N/A	#N/A	#REF!	Classified CMR according to Annex VI of Regulation 1272/2008	Carc. 1B Aquatic Acute 1 Aquatic Chronic 1	H350 H400 H410	#N/A	#N/A	#N/A	#N/A	#N/A	#N/A	#N/A		0	0	1	3	1	0	0	0	0	0	0	4														0.3	1.2
205-82-3	205-910-3	205-910-3	Benzo[j]fluoranthene	205-910-3	#N/A	#N/A	#N/A	#N/A	#REF!	Classified CMR according to Annex VI of Regulation 1272/2008	Carc. 1B Aquatic Acute 1 Aquatic Chronic 1	H350 H400 H410	#N/A	#N/A	#N/A	#N/A	#N/A	#N/A	#N/A		0	0	1	3	1	0	0	0	0	0	0	4														0.3	1.2
205-99-2	205-911-9	205-911-9	Benzo(e)acephenanthrylene	205-911-9	#N/A	#N/A	#N/A	#N/A	#REF!	Classified CMR according to Annex VI of Regulation 1272/2008	Carc. 1B Aquatic Acute 1 Aquatic Chronic 1	H350 H400 H410	#N/A	#N/A	#N/A	#N/A	#N/A	#N/A	#N/A		0	0	1	3	1	0	0	0	0	0	0	4														0.3	1.2
302-01-2, 7803-57-8	206-114-9	206-114-9	Hydrazine	206-114-9	#N/A	206-114-9	#N/A	#N/A	#REF!	Classified CMR according to Annex VI of Regulation 1272/2008	Flam. Liq. 3 Carc. 1B Acute Tox. 3 * Acute Tox. 3 * Acute Tox. 3 * Skin Corr. 1B Skin Sens. 1 Aquatic Acute 1 Aquatic Chronic 1	H226 H350 H331 H311 H301 H314 H317 H400 H410	#N/A	H226 H350 H331 H311 H301 H314 H317 H400 H410	Carcinogenic (Article 57a)	#N/A	#N/A	#N/A	#N/A		0	0	1	3	1	0	0	0	0	0	0	4														1	4
531-85-1	208-519-6	208-519-6	Benzidine dihydrochloride	208-519-6	#N/A	#N/A	#N/A	#N/A	#REF!	Classified CMR according to Annex VI of Regulation 1272/2008	Carc. 1A Acute Tox. 4 * Aquatic Acute 1 Aquatic Chronic 1	H350 H302 H400 H410	#N/A	#N/A	#N/A	#N/A	#N/A	#N/A	#N/A		0	0	1	3	1	0	0	0	0	0	0	4														0.3	1.2
531-86-2	208-520-1	208-520-1	[[1,1'-biphenyl]-4,4'-diyl]diammonium sulphate	208-520-1	#N/A	#N/A	#N/A	#N/A	#REF!	Classified CMR according to Annex VI of Regulation 1272/2008	Carc. 1A Acute Tox. 4 * Aquatic Acute 1 Aquatic Chronic 1	H350 H302 H400 H410	#N/A	#N/A	#N/A	#N/A	#N/A	#N/A	#N/A		0	0	1	3	1	0	0	0	0	0	0	4														0.3	1.2
548-62-9	208-953-6	208-953-6	[4-[4,4'-bis(dimethylamino) benzhydrylidene]cyclohexa-2,5-dien-1-ylidene]dimethylammonium chloride (C.I. Basic Violet 3) [with 0.1% of Michler's ketone (EC No. 202-027-5) or Michler's base (EC No. 202-959-2)]	208-953-6	#N/A	208-953-6	#N/A	#N/A	#REF!	Classified CMR according to Annex VI of Regulation 1272/2008	Carc. 1B Acute Tox. 4 * Eye Dam. 1 Aquatic Acute 1 Aquatic Chronic 1	H350 H302 H318 H400 H410	#N/A	H351 H302 H318 H400 H410	Carcinogenic (Article 57a)	#N/A	#N/A	#N/A	#N/A		0	0	1	3	1	0	0	0	0	0	0	4														1	4
553-00-4	209-030-0	209-030-0	2-naphthylammonium acetate	209-030-0	209-030-0	#N/A	#N/A	#N/A	#REF!	Classified CMR according to Annex VI of Regulation 1272/2008	Carc. 1A Acute Tox. 4 * Aquatic Chronic 2	H350 H302 H411	H350 H302 H411	#N/A	#N/A	#N/A	#N/A	#N/A	#N/A		0	0	1	3	1	0	0	0	0	0	0	4														1	4
561-41-1	209-218-2	209-218-2	4,4'-bis(dimethylamino)-4''-(methylamino)trityl alcohol [with 0.1% of Michler's ketone (EC No. 202-027-5) or Michler's base (EC No. 202-959-2)]	209-218-2	#N/A	209-218-2	#N/A	#N/A	#REF!	Classified CMR according to Annex VI of Regulation 1272/2008	Carc. 1B Aquatic Acute 1 Aquatic Chronic 1 Muta. 2 Eye Dam. 1	H350 H400 H410 H341 H318	#N/A	#N/A	Carcinogenic (Article 57a)	#N/A	#N/A	#N/A	#N/A		0	0	1	3	1	1	0	0	0	0	0	4														1	4
581-89-5	209-474-5	209-474-5	2-nitronaphthalene	209-474-5	#N/A	#N/A	#N/A	#N/A	#REF!	Classified CMR according to Annex VI of Regulation 1272/2008	Carc. 1B Aquatic Chronic 2	H350 H411	#N/A	#N/A	#N/A	#N/A	#N/A	#N/A	#N/A		0	0	1	3	1	0	0	0	0	0	0	4														0.3	1.2
602-01-7	210-013-5	210-013-5	2,3-dinitrotoluene	210-013-5	#N/A	#N/A	#N/A	#N/A	#REF!	Classified CMR according to Annex VI of Regulation 1272/2008	Carc. 1B Muta. 2 Repr. 2 Acute Tox. 3 * Acute Tox. 3 * Acute Tox. 3 * STOT RE 2 * Aquatic Acute 1 Aquatic Chronic 1	H350 H341 H361f *** H331 H311 H301 H373 ** H400 H410	#N/A	#N/A	#N/A	#N/A	#N/A	#N/A	#N/A		0	0	1	3	1	1	1	0	0	0	0	4														0.3	1.2
606-20-2	210-106-0	210-106-0	2,6-dinitrotoluene	210-106-0	#N/A	#N/A	#N/A	#N/A	#REF!	Classified CMR according to Annex VI of Regulation 1272/2008	Carc. 1B Muta. 2 Repr. 2 Acute Tox. 3 * Acute Tox. 3 * Acute Tox. 3 * STOT RE 2 * Aquatic Chronic 3	H350 H341 H361f *** H331 H311 H301 H373 ** H412	#N/A	#N/A	#N/A	#N/A	#N/A	#N/A	#N/A		0	0	1	3	1	1	1	0	0	0	0	4														0.3	1.2
610-39-9	210-222-1	210-222-1	3,4-dinitrotoluene	210-222-1	#N/A	#N/A	#N/A	#N/A	#REF!	Classified CMR according to Annex VI of Regulation 1272/2008	Carc. 1B Muta. 2 Repr. 2 Acute Tox. 3 * Acute Tox. 3 * Acute Tox. 3 * STOT RE 2 * Aquatic Chronic 2	H350 H341 H361f *** H331 H311 H301 H373 ** H411	#N/A	#N/A	#N/A	#N/A	#N/A	#N/A	#N/A		0	0	1	3	1	1	1	0	0	0	0	4														0.3	1.2
612-52-2	210-313-6	210-313-6	2-naphthylammonium chloride	210-313-6	210-313-6	#N/A	#N/A	#N/A	#REF!	Classified CMR according to Annex VI of Regulation 1272/2008	Carc. 1A Acute Tox. 4 * Aquatic Chronic 2	H350 H302 H411	H350 H302 H411	#N/A	#N/A	#N/A	#N/A	#N/A	#N/A		0	0	1	3	1	0	0	0	0	0	0	4														1	4
612-82-8	210-322-5	210-322-5	4,4'-bi-o-toluidine dihydrochloride	210-322-5	#N/A	#N/A	#N/A	#N/A	#REF!	Classified CMR according to Annex VI of Regulation 1272/2008	Carc. 1B Acute Tox. 4 * Aquatic Chronic 2	H350 H302 H411	#N/A	#N/A	#N/A	#N/A	#N/A	#N/A	#N/A		0	0	1	3	1	0	0	0	0	0	0	4														0.3	1.2
612-83-9	210-323-0	210-323-0	3,3'-dichlorobenzidine dihydrochloride	210-323-0	#N/A	#N/A	#N/A	#N/A	#REF!	Classified CMR according to Annex VI of Regulation 1272/2008	Carc. 1B Acute Tox. 4 * Skin Sens. 1 Aquatic Acute 1 Aquatic Chronic 1	H350 H312 H317 H400 H410	#N/A	#N/A	#N/A	#N/A	#N/A	#N/A	#N/A		0	0	1	3	1	0	0	0	0	0	0	4														0.3	1.2
615-05-4	210-406-1	210-406-1	4-methoxy-m-phenylenediamine	210-406-1	#N/A	#N/A	#N/A	#N/A	#REF!	Classified CMR according to Annex VI of Regulation 1272/2008	Carc. 1B Muta. 2 Acute Tox. 4 * Aquatic Chronic 2	H350 H341 H302 H411	#N/A	#N/A	#N/A	#N/A	#N/A	#N/A	#N/A		0	0	1	3	1	1	0	0	0	0	0	4														0.3	1.2
618-85-9	210-566-2	210-566-2	3,5-dinitrotoluene	210-566-2	#N/A	#N/A	#N/A	#N/A	#REF!	Classified CMR according to Annex VI of Regulation 1272/2008	Carc. 1B Muta. 2 Repr. 2 Acute Tox. 3 * Acute Tox. 3 * Acute Tox. 3 * STOT RE 2 * Aquatic Chronic 3	H350 H341 H361f *** H331 H311 H301 H373 ** H412	#N/A	#N/A	#N/A	#N/A	#N/A	#N/A	#N/A		0	0	1	3	1	1	1	0	0	0	0	4														0.3	1.2
619-15-8	210-581-4	210-581-4	2,5-dinitrotoluene	210-581-4	#N/A	#N/A	#N/A	#N/A	#REF!	Classified CMR according to Annex VI of Regulation 1272/2008	Carc. 1B Muta. 2 Repr. 2 Acute Tox. 3 * Acute Tox. 3 * Acute Tox. 3 * STOT RE 2 * Aquatic Chronic 2	H350 H341 H361f *** H331 H311 H301 H373 ** H411	#N/A	#N/A	#N/A	#N/A	#N/A	#N/A	#N/A		0	0	1	3	1	1	1	0	0	0	0	4														0.3	1.2
621-64-7	210-698-0	210-698-0	Nitrosodipropylamine	210-698-0	#N/A	#N/A	#N/A	#N/A	#REF!	Classified CMR according to Annex VI of Regulation 1272/2008	Carc. 1B Acute Tox. 4 * Aquatic Chronic 2	H350 H302 H411	#N/A	#N/A	#N/A	#N/A	#N/A	#N/A	#N/A		0	0	1	3	1	0	0	0	0	0	0	4														0.3	1.2
764-41-0	212-121-8	212-121-8	1,4-dichlorobut-2-ene	212-121-8	#N/A	#N/A	#N/A	#N/A	#REF!	Classified CMR according to Annex VI of Regulation 1272/2008	Carc. 1B Acute Tox. 2 * Acute Tox. 3 * Acute Tox. 3 * Skin Corr. 1B Aquatic Acute 1 Aquatic Chronic 1	H350 H330 H311 H301 H314 H400 H410	#N/A	#N/A	#N/A	#N/A	#N/A	#N/A	#N/A		0	0	1	3	1	0	0	0	0	0	0	4														0.3	1.2
838-88-0	212-658-8	212-658-8	4,4'-methylenedi-o-toluidine	212-658-8	#N/A	212-658-8	#N/A	#N/A	#REF!	Classified CMR according to Annex VI of Regulation 1272/2008	Carc. 1B Acute Tox. 4 * Skin Sens. 1 Aquatic Acute 1 Aquatic Chronic 1	H350 H302 H317 H400 H410	#N/A	H350 H302 H317 H400 H410	Carcinogenic (Article 57a)	#N/A	#N/A	#N/A	#N/A		0	0	1	3	1	0	0	0	0	0	0	4														1	4
1319-46-6	215-290-6	215-290-6	Trilead bis(carbonate) dihydroxide	215-290-6	#N/A	#N/A	#N/A	#N/A	#REF!	Classified CMR according to Annex VI of Regulation 1272/2008	Repr. 1A Acute Tox. 4 * Acute Tox. 4 * STOT RE 2 * Aquatic Acute 1 Aquatic Chronic 1	H360Df H332 H302 H373 ** H400 H410	#N/A	#N/A	#N/A	#N/A	#N/A	#N/A	#N/A		0	0	1	3	0	0	1	0	0	0	0	4														0.3	1.2
1763-23-1	217-179-8	217-179-8	PFOS, heptadecafluorooctane-1-sulfonic acid, perfluorooctane sulfonic acid	217-179-8	#N/A	#N/A	#N/A	#N/A	#REF!	Initial assessment: PFOS is reported to be both carcinogenic and toxic for reproduction. It is also very bioaccumulative, very persistent and is widely found in both humans and the environment.; ;Current Assessment: Classified CMR according to Annex VI of	Carc. 2 Repr. 1B STOT RE 1 Acute Tox. 4 * Acute Tox. 4 * Lact. Aquatic Chronic 2	H351 H360D*** H372** H332 H302 H362 H411	#N/A	#N/A	#N/A	#N/A	#N/A	#N/A	#N/A		0	0	1	3	1	0	1	0	0	0	0	4														0.3	1.2
2580-56-5	219-943-6	219-943-6	[4-[[4-anilino-1-naphthyl][4-(dimethylamino)phenyl]methylene]cyclohexa-2,5-dien-1-ylidene] dimethylammonium chloride (C.I. Basic Blue 26) [with 0.1% of Michler's ketone (EC No. 202-027-5) or Michler's base (EC No. 202-959-2)]	219-943-6	#N/A	219-943-6	#N/A	#N/A	#REF!	Classified CMR according to Annex VI of Regulation 1272/2008	Carc. 1B Aquatic Acute 1 Aquatic Chronic 1 Muta. 2 Eye Dam. 1	H350 H400 H410 H341 H318	#N/A	#N/A	Carcinogenic (Article 57a)	#N/A	#N/A	#N/A	#N/A		0	0	1	3	1	1	0	0	0	0	0	4														1	4
2795-39-3	220-527-1	220-527-1	potassium heptadecafluorooctane-1-sulfonate, potassium perfluorooctanesulfonate	220-527-1	#N/A	#N/A	#N/A	#N/A	#REF!	Initial assessment: PFOS is reported to be both carcinogenic and toxic for reproduction. It is also very bioaccumulative, very persistent and is widely found in both humans and the environment.; ;Current Assessment: Classified CMR according to Annex VI of	Carc. 2 Repr. 1B STOT RE 1 Acute Tox. 4 * Acute Tox. 4 * Lact. Aquatic Chronic 2	H351 H360D*** H372** H332 H302 H362 H411	#N/A	#N/A	#N/A	#N/A	#N/A	#N/A	#N/A		0	0	1	3	1	0	1	0	0	0	0	4														0.3	1.2
3033-77-0	221-221-0	221-221-0	2,3-epoxypropyltrimethylammonium chloride	221-221-0	#N/A	#N/A	#N/A	#N/A	#REF!	Classified CMR according to Annex VI of Regulation 1272/2008	Carc. 1B Muta. 2 Repr. 2 Acute Tox. 4 * Acute Tox. 4 * STOT RE 2 * Eye Dam. 1 Skin Sens. 1 Aquatic Chronic 3	H350 H341 H361f*** H312 H302 H373** H318 H317 H412	#N/A	#N/A	#N/A	#N/A	#N/A	#N/A	#N/A		0	0	1	3	1	1	1	0	0	0	0	4														0.3	1.2
3165-93-3	221-627-8	221-627-8	4-chloro-o-toluidinium chloride	221-627-8	#N/A	#N/A	#N/A	#N/A	#REF!	Classified CMR according to Annex VI of Regulation 1272/2008	Carc. 1B Muta. 2 Acute Tox. 3 * Acute Tox. 3 * Acute Tox. 3 * Aquatic Acute 1 Aquatic Chronic 1	H350 H341 H331 H311 H301 H400 H410	#N/A	#N/A	#N/A	#N/A	#N/A	#N/A	#N/A		0	0	1	3	1	1	0	0	0	0	0	4														0.3	1.2
5543-57-7	226-907-3	226-907-3	(S)-4-hydroxy-3-(3-oxo-1-phenylbutyl)-2-benzopyrone	226-907-3	#N/A	#N/A	#N/A	#N/A	#REF!	Classified CMR according to Annex VI of Regulation 1272/2008	Repr. 1A STOT RE 1 Aquatic Chronic 3	H360D *** H372 ** H412	#N/A	#N/A	#N/A	#N/A	#N/A	#N/A	#N/A		0	0	1	3	0	0	1	0	0	0	0	4														0.3	1.2
5543-58-8	226-908-9	226-908-9	(R)-4-hydroxy-3-(3-oxo-1-phenylbutyl)-2-benzopyrone	226-908-9	#N/A	#N/A	#N/A	#N/A	#REF!	Classified CMR according to Annex VI of Regulation 1272/2008	Repr. 1A STOT RE 1 Aquatic Chronic 3	H360D *** H372 ** H412	#N/A	#N/A	#N/A	#N/A	#N/A	#N/A	#N/A		0	0	1	3	0	0	1	0	0	0	0	4														0.3	1.2
6786-83-0	229-851-8	229-851-8	alpha,alpha-bis[4-(dimethylamino)phenyl]-4 (phenylamino)naphthalene-1-methanol (C.I. Solvent Blue 4)[with 0.1% of Michler's ketone (EC No. 202-027-5) or Michler's base (EC No. 202-959-2)]	229-851-8	#N/A	229-851-8	#N/A	#N/A	#REF!	Classified CMR according to Annex VI of Regulation 1272/2008	Carc. 1B Aquatic Acute 1 Aquatic Chronic 1 Muta. 2 Eye Dam. 1	H350 H400 H410 H341 H318	#N/A	#N/A	Carcinogenic (Article 57a)	#N/A	#N/A	#N/A	#N/A		0	0	1	3	1	1	0	0	0	0	0	4														1	4
7778-50-9	231-906-6	231-906-6	Potassium dichromate	#N/A	#N/A	#N/A	231-906-6	#N/A	#REF!	#N/A	#N/A	#N/A	#N/A	#N/A	Carcinogenic (Article 57a)#Mutagenic (Article 57b)#Toxic for reproduction (Article 57c)	H272 H350 H340 H360FD H330 H301 H312 H372 ** H314 H334 H317 H400 H410	#N/A	#N/A	#N/A		0	0	1	0	1	1	1	0	0	0	0	4														1	4
10043-35-3	233-139-2	233-139-2	Boric acid	233-139-2	#N/A	233-139-2	#N/A	#N/A	#REF!	Classified CMR according to Annex VI of Regulation 1272/2008	Repr. 1B	H360FD	#N/A	H360FD	Toxic for reproduction (Article 57c)	#N/A	#N/A	#N/A	CAT1		0	0	0	3	0	0	1	0	1	0	0	4														1	4
13464-97-6	236-690-7	236-690-7	Hydrazinium nitrate	236-690-7	#N/A	#N/A	#N/A	#N/A	#REF!	Classified CMR according to Annex VI of Regulation 1272/2008	Carc. 1B Acute Tox. 3 * Acute Tox. 3 * Acute Tox. 3 * Skin Sens. 1 Aquatic Acute 1 Aquatic Chronic 1	H350 H331 H311 H301 H317 H400 H410	#N/A	#N/A	#N/A	#N/A	#N/A	#N/A	#N/A		0	0	1	3	1	0	0	0	0	0	0	4														0.3	1.2
20543-06-0	243-867-2	243-867-2	oxalic acid, nickel salt	243-867-2	#N/A	#N/A	#N/A	#N/A	#REF!	Classified CMR according to Annex VI of Regulation 1272/2008	Carc. 1A STOT RE 1 Skin Sens. 1 Aquatic Acute 1 Aquatic Chronic 1	H350i H372** H317 H400 H410	#N/A	#N/A	#N/A	#N/A	#N/A	#N/A	#N/A		0	0	1	3	1	0	0	0	0	0	0	4														0.3	1.2
21136-70-9	244-236-4	244-236-4	Benzidine sulphate	244-236-4	#N/A	#N/A	#N/A	#N/A	#REF!	Classified CMR according to Annex VI of Regulation 1272/2008	Carc. 1A Acute Tox. 4 * Aquatic Acute 1 Aquatic Chronic 1	H350 H302 H400 H410	#N/A	#N/A	#N/A	#N/A	#N/A	#N/A	#N/A		0	0	1	3	1	0	0	0	0	0	0	4														0.3	1.2
25321-14-6	246-836-1	246-836-1	Dinitrotoluene	246-836-1	#N/A	#N/A	#N/A	#N/A	#REF!	Classified CMR according to Annex VI of Regulation 1272/2008	Carc. 1B Muta. 2 Repr. 2 Acute Tox. 3 * Acute Tox. 3 * Acute Tox. 3 * STOT RE 2 * Aquatic Acute 1 Aquatic Chronic 1	H350 H341 H361f*** H331 H311 H301 H373** H400 H410	#N/A	#N/A	#N/A	#N/A	#N/A	#N/A	#N/A		0	0	1	3	1	1	1	0	0	0	0	4														0.3	1.2
25376-45-8	246-910-3	246-910-3	Diaminotoluene	246-910-3	#N/A	#N/A	#N/A	#N/A	#REF!	Classified CMR according to Annex VI of Regulation 1272/2008	Carc. 1B Muta. 2 Repr. 2 Acute Tox. 3 * Acute Tox. 4 * STOT RE 2 * Eye Irrit. 2 Skin Sens. 1 Aquatic Chronic 2	H350 H341 H361f*** H301 H312 H373** H319 H317 H411	#N/A	#N/A	#N/A	#N/A	#N/A	#N/A	#N/A		0	0	1	3	1	1	1	0	0	0	0	4														0.3	1.2
29081-56-9	249-415-0	249-415-0	ammonium heptadecafluorooctanesulfonate, ammonium perfluorooctane sulfonate	249-415-0	#N/A	#N/A	#N/A	#N/A	#REF!	Initial assessment: PFOS is reported to be both carcinogenic and toxic for reproduction. It is also very bioaccumulative, very persistent and is widely found in both humans and the environment.; ;Current Assessment: Classified CMR according to Annex VI of	Carc. 2 Repr. 1B STOT RE 1 Acute Tox. 4 * Acute Tox. 4 * Lact. Aquatic Chronic 2	H351 H360D*** H372** H332 H302 H362 H411	#N/A	#N/A	#N/A	#N/A	#N/A	#N/A	#N/A		0	0	1	3	1	0	1	0	0	0	0	4														0.3	1.2
29457-72-5	249-644-6	249-644-6	lithium heptadecafluorooctanesulfonate, lithium perfluorooctane sulfonate	249-644-6	#N/A	#N/A	#N/A	#N/A	#REF!	Initial assessment: PFOS is reported to be both carcinogenic and toxic for reproduction. It is also very bioaccumulative, very persistent and is widely found in both humans and the environment.; ;Current Assessment: Classified CMR according to Annex VI of	Carc. 2 Repr. 1B STOT RE 1 Acute Tox. 4 * Acute Tox. 4 * Lact. Aquatic Chronic 2	H351 H360D*** H372** H332 H302 H362 H411	#N/A	#N/A	#N/A	#N/A	#N/A	#N/A	#N/A		0	0	1	3	1	0	1	0	0	0	0	4														0.3	1.2
36341-27-2	252-984-8	252-984-8	Benzidine acetate	252-984-8	#N/A	#N/A	#N/A	#N/A	#REF!	Classified CMR according to Annex VI of Regulation 1272/2008	Carc. 1A Acute Tox. 4 * Aquatic Acute 1 Aquatic Chronic 1	H350 H302 H400 H410	#N/A	#N/A	#N/A	#N/A	#N/A	#N/A	#N/A		0	0	1	3	1	0	0	0	0	0	0	4														0.3	1.2
39156-41-7	254-323-9	254-323-9	4-methoxy-m-phenylenediammonium sulphate	254-323-9	#N/A	#N/A	#N/A	#N/A	#REF!	Classified CMR according to Annex VI of Regulation 1272/2008	Carc. 1B Muta. 2 Acute Tox. 4 * Aquatic Chronic 2	H350 H341 H302 H411	#N/A	#N/A	#N/A	#N/A	#N/A	#N/A	#N/A		0	0	1	3	1	1	0	0	0	0	0	4														0.3	1.2
64969-34-2	265-293-1	265-293-1	3,3'-dichlorobenzidine dihydrogen bis(sulphate)	265-293-1	#N/A	#N/A	#N/A	#N/A	#REF!	Classified CMR according to Annex VI of Regulation 1272/2008	Carc. 1B Acute Tox. 4 * Skin Sens. 1 Aquatic Acute 1 Aquatic Chronic 1	H350 H312 H317 H400 H410	#N/A	#N/A	#N/A	#N/A	#N/A	#N/A	#N/A		0	0	1	3	1	0	0	0	0	0	0	4														0.3	1.2
64969-36-4	265-294-7	265-294-7	[3,3'-dimethyl[1,1'-biphenyl]-4,4'-diyl]diammonium bis(hydrogen sulphate)	265-294-7	#N/A	#N/A	#N/A	#N/A	#REF!	Classified CMR according to Annex VI of Regulation 1272/2008	Carc. 1B Acute Tox. 4 * Aquatic Chronic 2	H350 H302 H411	#N/A	#N/A	#N/A	#N/A	#N/A	#N/A	#N/A		0	0	1	3	1	0	0	0	0	0	0	4														0.3	1.2
65321-67-7	265-697-8	265-697-8	Toluene-2,4-diammonium sulphate	265-697-8	#N/A	#N/A	#N/A	#N/A	#REF!	Classified CMR according to Annex VI of Regulation 1272/2008	Carc. 1B Acute Tox. 3 * Acute Tox. 4 * Eye Irrit. 2 Skin Sens. 1 Aquatic Chronic 2	H350 H301 H312 H319 H317 H411	#N/A	#N/A	#N/A	#N/A	#N/A	#N/A	#N/A		0	0	1	3	1	0	0	0	0	0	0	4														0.3	1.2
69011-06-9	273-688-5	273-688-5	[Phthalato(2-)]dioxotrilead	273-688-5	#N/A	273-688-5	#N/A	#N/A	#REF!	Classified CMR according to Annex VI of Regulation 1272/2008	Repr. 1A Acute Tox. 4 * Acute Tox. 4 * STOT RE 2 * Aquatic Acute 1 Aquatic Chronic 1	H360Df H332 H302 H373 ** H400 H410	#N/A	#N/A	Toxic for reproduction (Article 57c)	#N/A	#N/A	#N/A	#N/A		0	0	1	3	0	0	1	0	0	0	0	4														1	4
70225-14-8	274-460-8	274-460-8	diethanolamine perfluorooctane sulfonate	274-460-8	#N/A	#N/A	#N/A	#N/A	#REF!	Initial assessment: PFOS is reported to be both carcinogenic and toxic for reproduction. It is also very bioaccumulative, very persistent and is widely found in both humans and the environment.; ;Current Assessment: Classified CMR according to Annex VI of	Carc. 2 Repr. 1B STOT RE 1 Acute Tox. 4 * Acute Tox. 4 * Lact. Aquatic Chronic 2	H351 H360D*** H372** H332 H302 H362 H411	#N/A	#N/A	#N/A	#N/A	#N/A	#N/A	#N/A		0	0	1	3	1	0	1	0	0	0	0	4														0.3	1.2
74332-73-3	277-822-3	277-822-3	3,3'-dichlorobenzidine sulphate	277-822-3	#N/A	#N/A	#N/A	#N/A	#REF!	Classified CMR according to Annex VI of Regulation 1272/2008	Carc. 1B Acute Tox. 4 * Skin Sens. 1 Aquatic Acute 1 Aquatic Chronic 1	H350 H312 H317 H400 H410	#N/A	#N/A	#N/A	#N/A	#N/A	#N/A	#N/A		0	0	1	3	1	0	0	0	0	0	0	4														0.3	1.2
74753-18-7	277-985-0	277-985-0	4,4'-bi-o-toluidine sulphate	277-985-0	#N/A	#N/A	#N/A	#N/A	#REF!	Classified CMR according to Annex VI of Regulation 1272/2008	Carc. 1B Acute Tox. 4 * Aquatic Chronic 2	H350 H302 H411	#N/A	#N/A	#N/A	#N/A	#N/A	#N/A	#N/A		0	0	1	3	1	0	0	0	0	0	0	4														0.3	1.2
80387-97-9	279-452-8	279-452-8	2-ethylhexyl [[[3,5-bis(1,1-dimethylethyl)-4-hydroxyphenyl]methyl]thio]acetate	279-452-8	#N/A	#N/A	#N/A	#N/A	#REF!	Classified CMR according to Annex VI of Regulation 1272/2008	Repr. 1B Skin Sens. 1 Aquatic Chronic 3	H360D *** H317 H412	#N/A	#N/A	#N/A	#N/A	#N/A	#N/A	#N/A		0	0	1	3	0	0	1	0	0	0	0	4														0.3	1.2
92129-57-2	295-859-3	295-859-3	slimes and sludges, copper electrolytic refining, decopperised, nickel sulfate	295-859-3	#N/A	#N/A	#N/A	#N/A	#REF!	Classified CMR according to Annex VI of Regulation 1272/2008	Carc. 1A Muta. 2 Repr. 1B STOT RE 1 Acute Tox. 4 * Acute Tox. 4 * Skin Irrit. 2 Resp. Sens. 1 Skin Sens. 1 Aquatic Acute 1 Aquatic Chronic 1	H350i H341 H360D*** H372** H332 H302 H315 H334 H317 H400 H410	#N/A	#N/A	#N/A	#N/A	#N/A	#N/A	#N/A		0	0	1	3	1	1	1	0	0	0	0	4														0.3	1.2
93983-68-7	301-323-2	301-323-2	dimethylhexanoic acid nickel salt	301-323-2	#N/A	#N/A	#N/A	#N/A	#REF!	Classified CMR according to Annex VI of Regulation 1272/2008	Carc. 1A Muta. 2 Repr. 1B STOT RE 1 Resp. Sens. 1 Skin Sens. 1 Aquatic Acute 1 Aquatic Chronic 1	H350i H341 H360D*** H372** H334 H317 H400 H410	#N/A	#N/A	#N/A	#N/A	#N/A	#N/A	#N/A		0	0	1	3	1	1	1	0	0	0	0	4														0.3	1.2
94551-87-8	305-433-1	305-433-1	slimes and sludges, copper electrolyte refining, decopperised	305-433-1	#N/A	#N/A	#N/A	#N/A	#REF!	Classified CMR according to Annex VI of Regulation 1272/2008	Carc. 1A Muta. 2 Repr. 1A STOT RE 1 Resp. Sens. 1 Skin Sens. 1 Aquatic Acute 1 Aquatic Chronic 1	H350i H341 H360D*** H372** H334 H317 H400 H410	#N/A	#N/A	#N/A	#N/A	#N/A	#N/A	#N/A		0	0	1	3	1	1	1	0	0	0	0	4														0.3	1.2
85136-74-9	400-340-3	400-340-3	6-hydroxy-1-(3-isopropoxypropyl)-4-methyl-2-oxo-5-[4-(phenylazo)phenylazo]-1,2-dihydro-3-pyridinecarbonitrile	400-340-3	#N/A	#N/A	#N/A	#N/A	#REF!	Classified CMR according to Annex VI of Regulation 1272/2008	Carc. 1B Aquatic Chronic 4	H350 H413	#N/A	#N/A	#N/A	#N/A	#N/A	#N/A	#N/A		0	0	1	3	1	0	0	0	0	0	0	4														0.3	1.2
71868-10-5	400-600-6	400-600-6	2-methyl-1-(4- methylthiophenyl)-2- morpholinopropan-1-one	400-600-6	#N/A	400-600-6	#N/A	#N/A	#REF!	Substance is agreed by RAC to be a classified CMR according to Annex VI of Regulation 1272/2008, however it is not yet formally included.	Repr. 1B Acute Tox. 4 *Aquatic Chronic 2	H360FD H302 H411	#N/A	H360FD H302 H411	Toxic for reproduction (Article 57c)	#N/A	#N/A	#N/A	#N/A		0	0	1	3	0	0	1	0	0	0	0	4														1	4
103112-35-2	401-290-5	401-290-5	ethyl 1-(2,4-dichlorophenyl)-5-trichloromethyl-1,2,4-(1H)-triazol-3-carboxylate	401-290-5	#N/A	#N/A	#N/A	#N/A	#REF!	Classified CMR according to Annex VI of Regulation 1272/2008	Carc. 1B Aquatic Acute 1 Aquatic Chronic 1	H350 H400 H410	#N/A	#N/A	#N/A	#N/A	#N/A	#N/A	#N/A		0	0	1	3	1	0	0	0	0	0	0	4														0.3	1.2
EC-401-500-5	401-500-5	401-500-5	(methylenebis(4,1-phenylenazo(1-(3-(dimethylamino)propyl) -1,2-dihydro-6-hydroxy-4-methyl-2-oxopyridine-5,3-diyl))) -1,1'-dipyridinium dichloride dihydrochloride	401-500-5	#N/A	#N/A	#N/A	#N/A	#REF!	Classified CMR according to Annex VI of Regulation 1272/2008	Carc. 1B Aquatic Chronic 2	H350 H411	#N/A	#N/A	#N/A	#N/A	#N/A	#N/A	#N/A		0	0	1	3	1	0	0	0	0	0	0	4														0.3	1.2
108225-03-2	402-060-7	402-060-7	(6-(4-hydroxy-3-(2-methoxyphenylazo)-2-sulfonato -7-naphthylamino)- 1,3,5-triazin-2,4-diyl)bis[(amino-1-methylethyl)ammonium] formate	402-060-7	#N/A	#N/A	#N/A	#N/A	#REF!	Classified CMR according to Annex VI of Regulation 1272/2008	Carc. 1B Eye Dam. 1 Aquatic Chronic 2	H350 H318 H411	#N/A	#N/A	#N/A	#N/A	#N/A	#N/A	#N/A		0	0	1	3	1	0	0	0	0	0	0	4														0.3	1.2
399-95-1	402-230-0	402-230-0	4-amino-3-fluorophenol	402-230-0	#N/A	#N/A	#N/A	#N/A	#REF!	Classified CMR according to Annex VI of Regulation 1272/2008	Carc. 1B Acute Tox. 4 * Skin Sens. 1 Aquatic Chronic 2	H350 H302 H317 H411	#N/A	#N/A	#N/A	#N/A	#N/A	#N/A	#N/A		0	0	1	3	1	0	0	0	0	0	0	4														0.3	1.2
EC-402-660-9	402-660-9	402-660-9	Dye K	402-660-9	#N/A	#N/A	#N/A	#N/A	#REF!	Classified CMR according to Annex VI of Regulation 1272/2008	Repr. 1B Aquatic Chronic 3	H360D *** H412	#N/A	#N/A	#N/A	#N/A	#N/A	#N/A	#N/A		0	0	1	3	0	0	1	0	0	0	0	4														0.3	1.2
85509-19-9	403-250-2	403-250-2	A mixture of: 4-[[bis-(4-fluorophenyl)methylsilyl]methyl]-4H-1,2,4-triazole; 1-[[bis-(4-fluorophenyl)methylsilyl]methyl]-1H-1,2,4-triazole	403-250-2	#N/A	#N/A	#N/A	#N/A	#REF!	Classified CMR according to Annex VI of Regulation 1272/2008	Carc. 2 Repr. 1B Acute Tox. 4 * Aquatic Chronic 2	H351 H360D *** H302 H411	#N/A	#N/A	#N/A	#N/A	#N/A	#N/A	#N/A		0	0	1	3	1	0	1	0	0	0	0	4														0.3	1.2
119313-12-1	-	404-360-3	2-benzyl-2-dimethylamino-4'-morpholinobutyrophenone	404-360-3	#N/A	404-360-3	#N/A	#N/A	#REF!	Classified CMR according to Annex VI of Regulation 1272/2008	Repr. 1B_x000D_ Aquatic Acute 1_x000D_ Aquatic Chronic 1	H360D_x000D_ H400_x000D_ H410	#N/A	H360D_x000D_ H400_x000D_ H410	Toxic for reproduction (Article 57c)	#N/A	#N/A	#N/A	#N/A		0	0	1	3	0	0	1	0	0	0	0	4														1	4
105024-66-6	405-020-7	405-020-7	(4-ethoxyphenyl)(3-(4-fluoro-3-phenoxyphenyl)propyl)dimethylsilane	405-020-7	#N/A	#N/A	#N/A	#N/A	#REF!	Classified CMR according to Annex VI of Regulation 1272/2008	Repr. 1B Aquatic Acute 1 Aquatic Chronic 1	H360F*** H400 H410	#N/A	#N/A	#N/A	#N/A	#N/A	#N/A	#N/A		0	0	1	3	0	0	1	0	0	0	0	4														0.3	1.2
EC-405-030-1	405-030-1	405-030-1	Hydrazine bis(3-carboxy-4-hydroxybenzensulfonate)	405-030-1	#N/A	#N/A	#N/A	#N/A	#REF!	Classified CMR according to Annex VI of Regulation 1272/2008	Acute Tox. 4 Skin Corr. 1B Skin Sens. 1 Carc. 1B Aquatic Chronic 3	H302 H314 H317 H350 H412	#N/A	#N/A	#N/A	#N/A	#N/A	#N/A	#N/A		0	0	1	3	1	0	0	0	0	0	0	4														0.3	1.2
61571-06-0	407-330-8	407-330-8	Tetrahydrothiopyran-3-carboxaldehyde	407-330-8	#N/A	#N/A	#N/A	#N/A	#REF!	Classified CMR according to Annex VI of Regulation 1272/2008	Repr. 1B Eye Dam. 1 Aquatic Chronic 3	H360D *** H318 H412	#N/A	#N/A	#N/A	#N/A	#N/A	#N/A	#N/A		0	0	1	3	0	0	1	0	0	0	0	4														0.3	1.2
119738-06-6	414-200-4	414-200-4	(+-)-tetrahydrofurfuryl-(R)-2-[4-(6-klorkinoxalin-2-yloxi)fenyloxi]propanoat	414-200-4	#N/A	#N/A	#N/A	#N/A	#REF!	Classified CMR according to Annex VI of Regulation 1272/2008	Muta. 2 Repr. 1B Acute Tox. 4 * STOT RE 2 * Aquatic Acute 1 Aquatic Chronic 1	H341 H360Df H302 H373 ** H400 H410	#N/A	#N/A	#N/A	#N/A	#N/A	#N/A	#N/A		0	0	1	3	0	1	1	0	0	0	0	4														0.3	1.2
302-97-6	414-990-0	414-990-0	3-oxoandrost-4-ene-17-?-carboxylic acid	414-990-0	#N/A	#N/A	#N/A	#N/A	#REF!	Classified CMR according to Annex VI of Regulation 1272/2008	Repr. 1A Aquatic Chronic 4	H361f H413	#N/A	#N/A	#N/A	#N/A	#N/A	#N/A	#N/A		0	0	1	3	0	0	1	0	0	0	0	4														0.3	1.2
70987-78-9	417-210-7	417-210-7	Oxiranemethanol, 4-methylbenzene-sulfonate, (S)-	417-210-7	#N/A	#N/A	#N/A	#N/A	#REF!	Classified CMR according to Annex VI of Regulation 1272/2008	Carc. 1B Muta. 2 Eye Dam. 1 Skin Sens. 1 Aquatic Chronic 2	H350 H341 H318 H317 H411	#N/A	#N/A	#N/A	#N/A	#N/A	#N/A	#N/A		0	0	1	3	1	1	0	0	0	0	0	4														0.3	1.2
EC-420-580-2	420-580-2	420-580-2	2-[2-hydroxy-3-(2-chlorophenyl)carbamoyl-1-naphthylazo]-7-[2-hydroxy-3-(3-methylphenyl)carbamoyl-1-naphthylazo]fluoren-9-one	420-580-2	#N/A	#N/A	#N/A	#N/A	#REF!	Classified CMR according to Annex VI of Regulation 1272/2008	Repr. 1B Aquatic Chronic 4	H360D *** H413	#N/A	#N/A	#N/A	#N/A	#N/A	#N/A	#N/A		0	0	1	3	0	0	1	0	0	0	0	4														0.3	1.2
143860-04-2	421-150-7	421-150-7	Zoldine MS-PLUS	421-150-7	#N/A	421-150-7	#N/A	#N/A	#REF!	Classified CMR according to Annex VI of Regulation 1272/2008	Repr. 1B Skin Corr. 1B Aquatic Acute 1 Aquatic Chronic 1	H360F *** H314 H400 H410	#N/A	H360F *** H314 H400 H410	Toxic for reproduction (Article 57c)	#N/A	#N/A	#N/A	#N/A		0	0	1	3	0	0	1	0	0	0	0	4														1	4
EC-421-550-1	421-550-1	421-550-1	A mixture of: 1,3,5-tris(3-aminomethylphenyl)-1,3,5-(1H,3H,5H)-triazine-2,4,6-trione; a mixture of oligomers of 3,5-bis(3-aminomethylphenyl)-1-poly[3,5-bis(3-aminomethylphenyl)-2,4,6-trioxo-1,3,5-(1H,3H,5H)-triazin-1-yl]-1,3,5-(1H,3H,5H))-triazine-2,4,6-t	421-550-1	#N/A	#N/A	#N/A	#N/A	#REF!	Classified CMR according to Annex VI of Regulation 1272/2008	Carc. 1B Repr. 1B Skin Sens. 1 Aquatic Chronic 3	H350 H360D *** H317 H412	#N/A	#N/A	#N/A	#N/A	#N/A	#N/A	#N/A		0	0	1	3	1	0	1	0	0	0	0	4														0.3	1.2
94723-86-1	425-150-8	425-150-8	2-butyryl-3-hydroxy-5-thiocyclohexan-3-yl-cyclohex-2-en-1-one	425-150-8	#N/A	#N/A	#N/A	#N/A	#REF!	Classified CMR according to Annex VI of Regulation 1272/2008	Repr. 1B Acute Tox. 4 * Skin Sens. 1 Aquatic Chronic 3	H360F*** H302 H317 H412	#N/A	#N/A	#N/A	#N/A	#N/A	#N/A	#N/A		0	0	1	3	0	0	1	0	0	0	0	4														0.3	1.2
EC-427-050-1	427-050-1	427-050-1	reaction mass of: 4,7-bis(mercaptomethyl)-3,6,9-trithia-1,11-undecanedithiol; 4,8-bis(mercaptomethyl)-3,6,9-trithia-1,11-undecanedithiol; 5,7-bis(mercaptomethyl)-3,6,9-trithia-1,11-undecanedithiol	427-050-1	#N/A	#N/A	#N/A	#N/A	#REF!	Classified CMR according to Annex VI of Regulation 1272/2008	Repr. 1A Skin Irrit. 2 Skin Sens. 1 Aquatic Acute 1 Aquatic Chronic 1	H361f H315 H317 H400 H410	#N/A	#N/A	#N/A	#N/A	#N/A	#N/A	#N/A		0	0	1	3	0	0	1	0	0	0	0	4														0.3	1.2
5571-36-8	427-230-8	427-230-8	cyclic 3-(1,2-ethanediylacetale)-estra-5(10),9(11)-diene-3,17-dione	427-230-8	#N/A	#N/A	#N/A	#N/A	#REF!	Classified CMR according to Annex VI of Regulation 1272/2008	Repr. 1B STOT RE 2 * Aquatic Chronic 2	H360F*** H373** H411	#N/A	#N/A	#N/A	#N/A	#N/A	#N/A	#N/A		0	0	1	3	0	0	1	0	0	0	0	4														0.3	1.2
82413-20-5	428-010-4	428-010-4	(E)-3-[1-[4-[2-(dimethylamino)ethoxy]phenyl]-2-phenylbut-1-enyl]phenol	428-010-4	#N/A	#N/A	#N/A	#N/A	#REF!	Classified CMR according to Annex VI of Regulation 1272/2008	Carc. 2 Repr. 1B Skin Sens. 1 Aquatic Acute 1 Aquatic Chronic 1	H351 H360F*** H317 H400 H410	#N/A	#N/A	#N/A	#N/A	#N/A	#N/A	#N/A		0	0	1	3	1	0	1	0	0	0	0	4														0.3	1.2
199327-61-2	429-400-7	429-400-7	7-methoxy-6-(3-morpholin-4-yl-propoxy)-3H-quinazolin-4-one	429-400-7	#N/A	#N/A	#N/A	#N/A	#REF!	Classified CMR according to Annex VI of Regulation 1272/2008	Repr. 1B Aquatic Chronic 3	H360D*** H412	#N/A	#N/A	#N/A	#N/A	#N/A	#N/A	#N/A		0	0	1	3	0	0	1	0	0	0	0	4														0.3	1.2
40722-80-3	429-740-6	429-740-6	(2-chloroethyl)(3-hydroxypropyl)ammonium chloride	429-740-6	#N/A	#N/A	#N/A	#N/A	#REF!	Classified CMR according to Annex VI of Regulation 1272/2008	Carc. 1B Muta. 1B STOT RE 2 * Skin Sens. 1 Aquatic Chronic 3	H350 H340 H373** H317 H412	#N/A	#N/A	#N/A	#N/A	#N/A	#N/A	#N/A		0	0	1	3	1	1	0	0	0	0	0	4														0.3	1.2
EC-432-750-3	432-750-3	432-750-3	O-hexyl-N-ethoxy carbonylthiocarbamate	432-750-3	#N/A	#N/A	#N/A	#N/A	#REF!	Classified CMR according to Annex VI of Regulation 1272/2008	Carc. 1B Muta. 1B Acute Tox. 4 * STOT RE 2 * Skin Sens. 1 Aquatic Chronic 2	H350 H340 H302 H373** H317 H411	#N/A	#N/A	#N/A	#N/A	#N/A	#N/A	#N/A		0	0	1	3	1	1	0	0	0	0	0	4														0.3	1.2
214353-17-0	433-580-2	433-580-2	1-(2-amino-5-chlorophenyl)-2,2,2-trifluoro-1,1-ethanediol, hydrochloride	433-580-2	#N/A	#N/A	#N/A	#N/A	#REF!	Classified CMR according to Annex VI of Regulation 1272/2008	Carc. 1B Acute Tox. 4 * Skin Corr. 1B Aquatic Chronic 2	H350 H302 H314 H411	#N/A	#N/A	#N/A	#N/A	#N/A	#N/A	#N/A		0	0	1	3	1	0	0	0	0	0	0	4														0.3	1.2
2040-90-6	433-890-8	433-890-8	2-chloro-6-fluoro-phenol	433-890-8	#N/A	#N/A	#N/A	#N/A	#REF!	Classified CMR according to Annex VI of Regulation 1272/2008	Muta. 1B Repr. 2 Acute Tox. 4 * Skin Corr. 1B Skin Sens. 1 Aquatic Chronic 2	H340 H361f*** H302 H314 H317 H411	#N/A	#N/A	#N/A	#N/A	#N/A	#N/A	#N/A		0	0	1	3	0	1	1	0	0	0	0	4														0.3	1.2
103122-66-3	434-350-4	434-350-4	O-isobutyl-N-ethoxy carbonylthiocarbamate	434-350-4	#N/A	#N/A	#N/A	#N/A	#REF!	Classified CMR according to Annex VI of Regulation 1272/2008	Flam. Liq. 3 Carc. 1B Muta. 1B Acute Tox. 4 * STOT RE 2 * Skin Sens. 1 Aquatic Chronic 2	H226 H350 H340 H302 H373** H317 H411	#N/A	#N/A	#N/A	#N/A	#N/A	#N/A	#N/A		0	0	1	3	1	1	0	0	0	0	0	4														0.3	1.2
27366-72-9	435-470-1	435-470-1	N,N-(dimethylamino)thioacetamide hydrochloride	435-470-1	#N/A	#N/A	#N/A	#N/A	#REF!	Classified CMR according to Annex VI of Regulation 1272/2008	Repr. 1B Aquatic Acute 1 Aquatic Chronic 1	H360D*** H400 H410	#N/A	#N/A	#N/A	#N/A	#N/A	#N/A	#N/A		0	0	1	3	0	0	1	0	0	0	0	4														0.3	1.2
100784-20-1	-	600-130-3	Halosulfuron-methyl (ISO)	600-130-3	#N/A	#N/A	#N/A	#N/A	#REF!	Classified CMR according to Annex VI of Regulation 1272/2008	Repr. 1B_x000D_ Aquatic Acute 1_x000D_ Aquatic Chronic 1	H360D_x000D_ H400_x000D_ H410	#N/A	#N/A	#N/A	#N/A	#N/A	#N/A	#N/A		0	0	1	3	0	0	1	0	0	0	0	4														0.3	1.2
EC-700-660-6	700-660-6	700-660-6	Saponification and oxidation product of carnauba wax with acidic sodium dichromate solution	700-660-6	#N/A	#N/A	#N/A	#N/A	#REF!	Classified CMR according to Annex VI of Regulation 1272/2008	Carc. 1B Skin Sens. 1 Aquatic Acute 1 Aquatic Chronic 1	H350i H317 H400 H410	#N/A	#N/A	#N/A	#N/A	#N/A	#N/A	#N/A		0	0	1	3	1	0	0	0	0	0	0	4														0.3	1.2
EC-700-720-1	700-720-1	700-720-1	Saponification and oxidation product of carnauba wax with acidic sodium dichromate solution esterified with ethylene glycol	700-720-1	#N/A	#N/A	#N/A	#N/A	#REF!	Classified CMR according to Annex VI of Regulation 1272/2008	Carc. 1B Skin Sens. 1 Aquatic Acute 1 Aquatic Chronic 1	H350i H317 H400 H410	#N/A	#N/A	#N/A	#N/A	#N/A	#N/A	#N/A		0	0	1	3	1	0	0	0	0	0	0	4														0.3	1.2
EC-700-725-9	700-725-9	700-725-9	Saponification and oxidation product of carnauba wax with acidic sodium dichromate solution esterified with 1-methyl-1,3-propanediol and subsequent saponification with calcium dihydroxide	700-725-9	#N/A	#N/A	#N/A	#N/A	#REF!	Classified CMR according to Annex VI of Regulation 1272/2008	Carc. 1B Skin Sens. 1 Aquatic Acute 1 Aquatic Chronic 1	H350i H317 H400 H410	#N/A	#N/A	#N/A	#N/A	#N/A	#N/A	#N/A		0	0	1	3	1	0	0	0	0	0	0	4														0.3	1.2
36861-47-9	253-242-6	253-242-6	3-(4-Methylbenzylidene)camphor; 1,7,7-trimethyl-3-[(4-methylphenyl)methylene]bicyclo[2.2.1]heptan-2-one	253-242-6	#N/A	#N/A	#N/A	253-242-6	#REF!	3-(4-methylbenzylidene) camphor (4-MBC) is an endocrine disruptor with estrogen, antiandrogen, thyroid and progesterone activity, affecting several body functions and target organs including development of reproductive organs and behaviour. The substance	Official classification missing - 57f substance	#N/A	#N/A	#N/A	#N/A	#N/A	H373; H315; H319; H361; H400; H410	Potential endocrine disruptor	CAT1		0	0	1	0	0	0	1	1	1	0	0	4														0.5	2
100-61-8	-	202-870-9	-	#N/A	#N/A	#N/A	#N/A	202-870-9	#REF!	#N/A	#N/A	#N/A	#N/A	#N/A	#N/A	#N/A	H400; H410; H311; H413; H301; H361; H373; H351; H316; H331; H319; H320	Suspected Carcinogenic#Suspected Mutagenic#Cumulative exposure#Exposure of workers#High RCR#Wide dispersive use	#N/A		0	0	1	0	1	0.7	1	0	0	0	0	3.7														0.5	1.85
96-29-7	202-496-6	202-496-6	Butanone oxime	#N/A	#N/A	#N/A	#N/A	202-496-6	#REF!	#N/A	#N/A	#N/A	#N/A	#N/A	#N/A	#N/A	H351 H312 H318 H317	CMR#Sensitiser#Consumer use#Cumulative exposure#High RCR#Wide dispersive use	#N/A		0	0	0	3	1	0	0	0	0	0.6	0	3.6														0.5	1.8
126-72-7	-	-	Tris (2,3 dibromopropyl) phosphate	#N/A	126-72-7	#N/A	#N/A	#N/A	#N/A	#N/A	#N/A	#N/A	#N/A	#N/A	#N/A	#N/A	#N/A	#N/A	#N/A		0	0	0	0	0	0	0	0	0	0	3.5	3.5														1	3.5
25637-99-4	-	-	Hexabromocyclododecane (HBCDD)	#N/A	#N/A	#N/A	#N/A	#N/A	#N/A	#N/A	#N/A	#N/A	#N/A	#N/A	#N/A	#N/A	#N/A	#N/A	#N/A		0	0	0	0	0	0	0	0	0	0	3.5	3.5														0	0
35223-80-4	-	-	Propyl bromoacetate	#N/A	35223-80-4	#N/A	#N/A	#N/A	#N/A	#N/A	#N/A	#N/A	#N/A	#N/A	#N/A	#N/A	#N/A	#N/A	#N/A		0	0	0	0	0	0	0	0	0	0	3.5	3.5														1	3.5
59536-65-1	-	-	Polybromobiphenyls, Polybrominatedbiphenyls (PBB)	#N/A	59536-65-1	#N/A	#N/A	#N/A	#N/A	#N/A	#N/A	#N/A	#N/A	#N/A	#N/A	#N/A	#N/A	#N/A	#N/A		0	0	0	0	0	0	0	0	0	0	3.5	3.5														1	3.5
541-02-6	208-764-9	208-764-9	Decamethylcyclopentasiloxane (D5)	#N/A	208-764-9	#N/A	#N/A	#N/A	#REF!	#N/A	#N/A	#N/A	#N/A	#N/A	#N/A	#N/A	#N/A	#N/A	#N/A		0	0	0	0	0	0	0	0	0	0	3.5	3.5														1	3.5
67-72-1	200-666-4	200-666-4	Hexachloroethane	#N/A	200-666-4	#N/A	#N/A	#N/A	#REF!	#N/A	#N/A	#N/A	#N/A	#N/A	#N/A	#N/A	#N/A	#N/A	#N/A		0	0	0	0	0	0	0	0	0	0	3.5	3.5														1	3.5
74-87-3	200-817-4	200-817-4	Chloromethane	#N/A	#N/A	#N/A	#N/A	200-817-4	#REF!	#N/A	#N/A	#N/A	#N/A	#N/A	#N/A	#N/A	H220 H351 H373 **	CMR#Potential endocrine disruptor#High RCR	#N/A		0	0	0	3	1	0	0	0	0.5	0	0	3.5														0.5	1.75
75-15-0	200-843-6	200-843-6	Carbon disulphide	200-843-6	#N/A	#N/A	#N/A	200-843-6	#REF!	This substance has endocrine disrupting properties. Human workers exposed to the chemical have shown dysfunctional sex behaviour, lowered sperm quality and alterations in testosterone levels. Animal studies show similar results including increased malform	Flam. Liq. 2 Skin Irrit. 2 Eye Irrit. 2 Repr. 2 STOT RE 1 Official classification missing	H225 H315 H319 H361fd H372 **	#N/A	#N/A	#N/A	#N/A	H225 H361fd H372 ** H315 H319	CMR#Potential endocrine disruptor#Exposure of environment#Exposure of workers#High (aggregated) tonnage	CAT2		0	0	0	3	0	0	1	0	0.5	0	0	3.5														0.5	1.75
96-32-2	202-499-2	202-499-2	Methyl bromoacetate	#N/A	202-499-2	#N/A	#N/A	#N/A	#REF!	#N/A	#N/A	#N/A	#N/A	#N/A	#N/A	#N/A	#N/A	#N/A	#N/A		0	0	0	0	0	0	0	0	0	0	3.5	3.5														1	3.5
121-19-7	204-453-7	204-453-7	Roxarsone	#N/A	204-453-7	#N/A	#N/A	#N/A	#REF!	#N/A	#N/A	#N/A	#N/A	#N/A	#N/A	#N/A	#N/A	#N/A	#N/A		0	0	0	0	0	0	0	0	0	0	3.5	3.5														1	3.5
552-89-6	209-025-3	209-025-3	o-Nitrobenzaldehyde	#N/A	209-025-3	#N/A	#N/A	#N/A	#REF!	#N/A	#N/A	#N/A	#N/A	#N/A	#N/A	#N/A	#N/A	#N/A	#N/A		0	0	0	0	0	0	0	0	0	0	3.5	3.5														1	3.5
556-67-2	209-136-7	209-136-7	Octamethylcyclotetrasiloxane (D4)	#N/A	209-136-7	#N/A	#N/A	#N/A	#REF!	#N/A	#N/A	#N/A	#N/A	#N/A	#N/A	#N/A	#N/A	#N/A	#N/A		0	0	0	0	0	0	0	0	0	0	3.5	3.5														1	3.5
624-49-7	210-849-0	210-849-0	Dimethylfumarate (DMF)	#N/A	210-849-0	#N/A	#N/A	#N/A	#REF!	#N/A	#N/A	#N/A	#N/A	#N/A	#N/A	#N/A	#N/A	#N/A	#N/A		0	0	0	0	0	0	0	0	0	0	3.5	3.5														1	3.5
630-20-6	211-135-1	211-135-1	1,1,1,2-Tetrachloroethane	#N/A	#N/A	#N/A	#N/A	#N/A	#REF!	#N/A	#N/A	#N/A	#N/A	#N/A	#N/A	#N/A	#N/A	#N/A	#N/A		0	0	0	0	0	0	0	0	0	0	3.5	3.5														0	0
2917-32-0	220-847-1	220-847-1	Zinc bis(pentachlorophenolate)	#N/A	220-847-1	#N/A	#N/A	#N/A	#REF!	#N/A	#N/A	#N/A	#N/A	#N/A	#N/A	#N/A	#N/A	#N/A	#N/A		0	0	0	0	0	0	0	0	0	0	3.5	3.5														1	3.5
3772-94-9	223-220-0	223-220-0	Pentachlorophenyl laurate	#N/A	223-220-0	#N/A	#N/A	#N/A	#REF!	#N/A	#N/A	#N/A	#N/A	#N/A	#N/A	#N/A	#N/A	#N/A	#N/A		0	0	0	0	0	0	0	0	0	0	3.5	3.5														1	3.5
6484-52-2	229-347-8	229-347-8	Ammonium nitrate (AN)	#N/A	229-347-8	#N/A	#N/A	#N/A	#REF!	#N/A	#N/A	#N/A	#N/A	#N/A	#N/A	#N/A	#N/A	#N/A	#N/A		0	0	0	0	0	0	0	0	0	0	3.5	3.5														1	3.5
8021-39-4	232-419-1	232-419-1	Creosote, wood	#N/A	232-419-1	#N/A	#N/A	#N/A	#REF!	#N/A	#N/A	#N/A	#N/A	#N/A	#N/A	#N/A	#N/A	#N/A	#N/A		0	0	0	0	0	0	0	0	0	0	3.5	3.5														1	3.5
12124-99-1	235-184-3	235-184-3	Ammonium hydrogen sulphide	#N/A	235-184-3	#N/A	#N/A	#N/A	#REF!	#N/A	#N/A	#N/A	#N/A	#N/A	#N/A	#N/A	#N/A	#N/A	#N/A		0	0	0	0	0	0	0	0	0	0	3.5	3.5														1	3.5
12135-76-1	235-223-4	235-223-4	Ammonium sulphide	#N/A	235-223-4	#N/A	#N/A	#N/A	#REF!	#N/A	#N/A	#N/A	#N/A	#N/A	#N/A	#N/A	#N/A	#N/A	#N/A		0	0	0	0	0	0	0	0	0	0	3.5	3.5														1	3.5
13673-51-3	237-155-0	237-155-0	N2-benzyl pentachlorophenyl N2-carboxy-L-(2-aminoglutaramate)	#N/A	237-155-0	#N/A	#N/A	#N/A	#REF!	#N/A	#N/A	#N/A	#N/A	#N/A	#N/A	#N/A	#N/A	#N/A	#N/A		0	0	0	0	0	0	0	0	0	0	3.5	3.5														1	3.5
13673-53-5	237-156-6	237-156-6	Perchlorophenyl N-(benzyloxycarbonyl)-L-isoleucinate	#N/A	237-156-6	#N/A	#N/A	#N/A	#REF!	#N/A	#N/A	#N/A	#N/A	#N/A	#N/A	#N/A	#N/A	#N/A	#N/A		0	0	0	0	0	0	0	0	0	0	3.5	3.5														1	3.5
13673-54-6	237-157-1	237-157-1	Perchlorophenyl S-benzyl-N-(benzyloxycarbonyl)-L-cysteinate	#N/A	237-157-1	#N/A	#N/A	#N/A	#REF!	#N/A	#N/A	#N/A	#N/A	#N/A	#N/A	#N/A	#N/A	#N/A	#N/A		0	0	0	0	0	0	0	0	0	0	3.5	3.5														1	3.5
18991-98-5	242-729-9	242-729-9	Butyl bromoacetate	#N/A	242-729-9	#N/A	#N/A	#N/A	#REF!	#N/A	#N/A	#N/A	#N/A	#N/A	#N/A	#N/A	#N/A	#N/A	#N/A		0	0	0	0	0	0	0	0	0	0	3.5	3.5														1	3.5
23234-97-1	245-508-5	245-508-5	Pentachlorophenyl N-[[(4-methoxyphenyl)methoxy]carbonyl]-L-serinate	#N/A	245-508-5	#N/A	#N/A	#N/A	#REF!	#N/A	#N/A	#N/A	#N/A	#N/A	#N/A	#N/A	#N/A	#N/A	#N/A		0	0	0	0	0	0	0	0	0	0	3.5	3.5														1	3.5
28990-85-4	249-360-2	249-360-2	Perchlorophenyl 5-oxo-L-prolinate	#N/A	249-360-2	#N/A	#N/A	#N/A	#REF!	#N/A	#N/A	#N/A	#N/A	#N/A	#N/A	#N/A	#N/A	#N/A	#N/A		0	0	0	0	0	0	0	0	0	0	3.5	3.5														1	3.5
68990-67-0	273-620-4	273-620-4	Soap bark powder (Quillaja saponaria) and its derivatives containing saponines	#N/A	273-620-4	#N/A	#N/A	#N/A	#REF!	#N/A	#N/A	#N/A	#N/A	#N/A	#N/A	#N/A	#N/A	#N/A	#N/A		0	0	0	0	0	0	0	0	0	0	3.5	3.5														1	3.5
68412-53-3	614-460-0	614-460-0	Nonylphenol, branched, ethoxylated, phosphated	#N/A	614-460-0	#N/A	#N/A	#N/A	#REF!	#N/A	#N/A	#N/A	#N/A	#N/A	#N/A	#N/A	#N/A	#N/A	#N/A		0	0	0	0	0	0	0	0	0	0	3.5	3.5														1	3.5
1244733-77-4	-	807-935-0	-	#N/A	#N/A	#N/A	#N/A	#N/A	#REF!	#N/A	#N/A	#N/A	#N/A	#N/A	#N/A	#N/A	#N/A	#N/A	#N/A		0	0	0	0	0	0	0	0	0	0	3.5	3.5														0	0
1306-38-3	-	215-150-4	-	#N/A	#N/A	#N/A	#N/A	#N/A	#REF!	#N/A	#N/A	#N/A	#N/A	#N/A	#N/A	#N/A	#N/A	#N/A	#N/A		0	0	0	0	0	0	0	0	0	0	3.5	3.5														0	0
10025-91-9	-	233-047-2	-	#N/A	#N/A	#N/A	#N/A	#N/A	#REF!	#N/A	#N/A	#N/A	#N/A	#N/A	#N/A	#N/A	#N/A	#N/A	#N/A		0	0	0	0	0	0	0	0	0	0	3.5	3.5														0	0
-	-	701-241-0, 906-390-7	-	#N/A	#N/A	#N/A	#N/A	#N/A	#REF!	#N/A	#N/A	#N/A	#N/A	#N/A	#N/A	#N/A	#N/A	#N/A	#N/A		0	0	0	0	0	0	0	0	0	0	3.5	3.5														0	0
1308-38-9	-	215-160-9	-	#N/A	#N/A	#N/A	#N/A	#N/A	#REF!	#N/A	#N/A	#N/A	#N/A	#N/A	#N/A	#N/A	#N/A	#N/A	#N/A		0	0	0	0	0	0	0	0	0	0	3.5	3.5														0	0
13463-67-7	-	236-675-5	-	#N/A	#N/A	#N/A	#N/A	#N/A	#REF!	#N/A	#N/A	#N/A	#N/A	#N/A	#N/A	#N/A	#N/A	#N/A	#N/A		0	0	0	0	0	0	0	0	0	0	3.5	3.5														0	0
1345-04-6	-	215-713-4	-	#N/A	#N/A	#N/A	#N/A	#N/A	#REF!	#N/A	#N/A	#N/A	#N/A	#N/A	#N/A	#N/A	#N/A	#N/A	#N/A		0	0	0	0	0	0	0	0	0	0	3.5	3.5														0	0
7440-36-0	-	231-146-5	-	#N/A	#N/A	#N/A	#N/A	#N/A	#REF!	#N/A	#N/A	#N/A	#N/A	#N/A	#N/A	#N/A	#N/A	#N/A	#N/A		0	0	0	0	0	0	0	0	0	0	3.5	3.5														0	0
-	-	701-266-7	-	#N/A	#N/A	#N/A	#N/A	#N/A	#REF!	#N/A	#N/A	#N/A	#N/A	#N/A	#N/A	#N/A	#N/A	#N/A	#N/A		0	0	0	0	0	0	0	0	0	0	3.5	3.5														0	0
-	-	701-263-0	-	#N/A	#N/A	#N/A	#N/A	#N/A	#REF!	#N/A	#N/A	#N/A	#N/A	#N/A	#N/A	#N/A	#N/A	#N/A	#N/A		0	0	0	0	0	0	0	0	0	0	3.5	3.5														0	0
1309-64-4	-	215-175-0	-	#N/A	#N/A	#N/A	#N/A	#N/A	#REF!	#N/A	#N/A	#N/A	#N/A	#N/A	#N/A	#N/A	#N/A	#N/A	#N/A		0	0	0	0	0	0	0	0	0	0	3.5	3.5														0	0
108-88-3	203-625-9	203-625-9	Toluene	#N/A	203-625-9	#N/A	#N/A	203-625-9	#REF!	#N/A	#N/A	#N/A	H225 H361d *** H304 H336 H373 ** H315	#N/A	#N/A	#N/A	H225 H361d *** H304 H336 H373 ** H315	CMR#Other hazard based concern#Consumer use#High (aggregated) tonnage#Wide dispersive use	#N/A		0	0	0	3	0	0	1	0	0	0.4	0	3.4														1	3.4
119-61-9	204-337-6	204-337-6	Benzophenone	204-337-6	#N/A	#N/A	#N/A	204-337-6	#REF!	For Benzophenone carcinogenic effects have been reported. It is potentially persistent and has been found in the environment. Its derivates are potential endocrine disruptors.	Official classification missing - 57f substance	#N/A	#N/A	#N/A	#N/A	#N/A	#N/A	Suspected CMR#Consumer use#High RCR#Wide dispersive use	CAT3b		0	0	0	2.1	0	0	0	1	0.3	0	0	3.4														0.5	1.7
126-73-8	204-800-2	204-800-2	Tributyl phosphate	#N/A	#N/A	#N/A	#N/A	204-800-2	#REF!	#N/A	#N/A	#N/A	#N/A	#N/A	#N/A	#N/A	H351 H302 H315	CMR#Other hazard based concern#High (aggregated) tonnage#Wide dispersive use	#N/A		0	0	0	3	1	0	0	0	0	0.4	0	3.4														0.5	1.7
7758-19-2	-	231-836-6	-	#N/A	#N/A	#N/A	#N/A	231-836-6	#REF!	#N/A	#N/A	#N/A	#N/A	#N/A	#N/A	#N/A	H400; H412; H302; H317; H318; H351; H372; H315; H350; H371; H373;	Suspected Mutagenic#Suspected Reprotoxic#Exposure of workers#Wide dispersive use	#N/A		0	0	1	0	1	0.7	0.7	0	0	0	0	3.4														0.5	1.7
68-12-2	200-679-5	200-679-5	N,N-dimethylformamide	200-679-5	#N/A	200-679-5	#N/A	#N/A	#REF!	Classified CMR (Class I & II) according to Annex 1 of Directive 67/548/EEC	Repr. 1B Acute Tox. 4 * Acute Tox. 4 * Eye Irrit. 2	H360D *** H332 H312 H319	#N/A	H360D *** H332 H312 H319	Toxic for reproduction (Article 57c)	#N/A	#N/A	#N/A	CAT3b		0	0	0	3	0	0	1	0	0.3	0	0	3.3														1	3.3
75-09-2	200-838-9	200-838-9	Dichloromethane	#N/A	200-838-9	#N/A	#N/A	200-838-9	#REF!	#N/A	#N/A	#N/A	H351	#N/A	#N/A	#N/A	H351	Carcinogenic#Suspected Mutagenic#Suspected Reprotoxic#Potential endocrine disruptor#Suspected Sensitiser#High (aggregated) tonnage	#N/A		0	0	0	0	1	0.7	0.7	0	0.5	0.4	0	3.3														1	3.3
79-44-7	201-208-6	201-208-6	Dimethylcarbamoyl chloride	201-208-6	#N/A	#N/A	#N/A	#N/A	#REF!	Classified CMR according to Annex VI of Regulation 1272/2008	Carc. 1B Acute Tox. 3 * Acute Tox. 4 * Eye Irrit. 2 STOT SE 3 Skin Irrit. 2	H350 H331 H302 H319 H335 H315	#N/A	#N/A	#N/A	#N/A	#N/A	#N/A	CAT3b		0	0	0	3	1	0	0	0	0.3	0	0	3.3														0.3	0.99
108-45-2	203-584-7	203-584-7	m-phenylenediamine	#N/A	#N/A	#N/A	#N/A	203-584-7	#REF!	#N/A	#N/A	#N/A	#N/A	#N/A	#N/A	#N/A	H341 H331 H311 H301 H319 H317 H400 H410	Suspected Reprotoxic#Sensitiser#Exposure of workers#High (aggregated) tonnage	#N/A		0	0	1	0	0	1	0.7	0	0	0.6	0	3.3														0.5	1.65
80-09-1	201-250-5	201-250-5	Bisphenol S	201-250-5	#N/A	#N/A	#N/A	201-250-5	#REF!	This substance has endocrine disrupting properties. Bisphenol S has shown to be estrogenic in in vitro studies. In vivo studies have shown impaired reproduction in zebrafish and uterine growth in rat.	Official classification missing	#N/A	#N/A	#N/A	#N/A	#N/A	#N/A	Suspected CMR#Potential endocrine disruptor#High (aggregated) tonnage	#N/A		0	0	0	2.1	0	0	0	0	1	0	0	3.1														0.5	1.55
95-50-1	202-425-9	202-425-9	1,2-dichlorobenzene	202-425-9	#N/A	#N/A	#N/A	202-425-9	#REF!	1,2-dichlorobenzene is very toxic to aquatic species, it is potentially very persistant and very bioaccumulative and has been detected in environmental and human samples.	Acute Tox. 4 * Eye Irrit. 2 STOT SE 3 Skin Irrit. 2 Aquatic Acute 1 Aquatic Chronic 1	H302 H319 H335 H315 H400 H410	#N/A	#N/A	#N/A	#N/A	H302 H335 H315 H319 H400 H410	Suspected CMR#High (aggregated) tonnage#Wide dispersive use	#N/A		0	0	1	2.1	0	0	0	0	0	0	0	3.1														0.5	1.55
99-96-7	202-804-9	202-804-9	4-hydroxybenzoic acid	#N/A	#N/A	#N/A	#N/A	202-804-9	#REF!	#N/A	#N/A	#N/A	#N/A	#N/A	#N/A	#N/A	#N/A	Suspected CMR#Potential endocrine disruptor#Consumer use#High (aggregated) tonnage	CAT1		0	0	0	2.1	0	0	0	0	1	0	0	3.1														0.5	1.55
10332-33-9	-	-	perboric acid (HBO(O2)), sodium salt, monohydrate	10332-33-9	#N/A	#N/A	#N/A	#N/A	#N/A	Classified CMR according to Annex VI of Regulation 1272/2008	Oxid. Sol. 3 Repr. 1B Acute Tox. 4 * STOT SE 3 Eye Dam. 1	H272 H360Df H302 H335 H318	#N/A	#N/A	#N/A	#N/A	#N/A	#N/A	#N/A		0	0	0	3	0	0	1	0	0	0	0	3														0.3	0.9
10486-00-7	-	-	perboric acid (HBO(O2)), sodium salt, tetrahydrate	10486-00-7	#N/A	#N/A	#N/A	#N/A	#N/A	Classified CMR according to Annex VI of Regulation 1272/2008	Repr. 1B STOT SE 3 Eye Dam. 1	H360Df H335 H318	#N/A	#N/A	#N/A	#N/A	#N/A	#N/A	#N/A		0	0	0	3	0	0	1	0	0	0	0	3														0.3	0.9
12001-28-4	-	-	Crocidolite	12001-28-4	12001-28-4	#N/A	#N/A	#N/A	#N/A	Classified CMR according to Annex VI of Regulation 1272/2008	Carc. 1A STOT RE 1	H350 H372 **	H350 H372 **	#N/A	#N/A	#N/A	#N/A	#N/A	#N/A		0	0	0	3	1	0	0	0	0	0	0	3														1	3
12040-72-1	-	-	perboric acid, sodium salt, monohydrate	12040-72-1	#N/A	#N/A	#N/A	#N/A	#N/A	Classified CMR according to Annex VI of Regulation 1272/2008	Oxid. Sol. 3 Repr. 1B Acute Tox. 4 * STOT SE 3 Eye Dam. 1	H272 H360Df H302 H335 H318	#N/A	#N/A	#N/A	#N/A	#N/A	#N/A	#N/A		0	0	0	3	0	0	1	0	0	0	0	3														0.3	0.9
12172-73-5	-	-	Amosite	12172-73-5	12172-73-5	#N/A	#N/A	#N/A	#N/A	Classified CMR according to Annex VI of Regulation 1272/2008	Carc. 1A STOT RE 1	H350 H372 **	H350 H372 **	#N/A	#N/A	#N/A	#N/A	#N/A	#N/A		0	0	0	3	1	0	0	0	0	0	0	3														1	3
12510-42-8	-	-	Erionite	12510-42-8	#N/A	#N/A	#N/A	#N/A	#N/A	Classified CMR according to Annex VI of Regulation 1272/2008	Carc. 1A	H350	#N/A	#N/A	#N/A	#N/A	#N/A	#N/A	#N/A		0	0	0	3	1	0	0	0	0	0	0	3														0.3	0.9
1332-21-4	-	-	Asbestos	1332-21-4	#N/A	#N/A	#N/A	#N/A	#N/A	Classified CMR according to Annex VI of Regulation 1272/2008	Carc. 1A STOT RE 1	H350 H372 **	#N/A	#N/A	#N/A	#N/A	#N/A	#N/A	#N/A		0	0	0	3	1	0	0	0	0	0	0	3														0.3	0.9
13517-20-9	-	-	perboric acid (H3BO2(O2)), monosodium salt trihydrate	13517-20-9	#N/A	#N/A	#N/A	#N/A	#N/A	Classified CMR according to Annex VI of Regulation 1272/2008	Repr. 1B STOT SE 3 Eye Dam. 1	H360Df H335 H318	#N/A	#N/A	#N/A	#N/A	#N/A	#N/A	#N/A		0	0	0	3	0	0	1	0	0	0	0	3														0.3	0.9
3050-88-2	-	-	Phenol, 4-nonyl, phosphite (3:1) (TNPP)	3050-88-2	#N/A	3050-88-2	#N/A	#N/A	#N/A	Substance is concluded to be an endocrine disruptor SVHC by ECHA Member State Committe when including = 0,1% 4-NonylPhenol.	Skin Sens. 1; Aquatic Acute 1; Aquatic Chronic 1	H317; H400; H410	#N/A	#N/A	Endocrine disrupting properties (Article 57(f) - environment)	#N/A	#N/A	#N/A	#N/A		0	0	1	0	0	0	0	1	1	0	0	3														1	3
37244-98-7	-	-	perboric acid, sodium salt, tetrahydrate	37244-98-7	#N/A	#N/A	#N/A	#N/A	#N/A	Classified CMR according to Annex VI of Regulation 1272/2008. (Might not apply when contaminants are below below legal thresholds and/or full refining history is known)	Repr. 1B STOT SE 3 Eye Dam. 1	H360Df H335 H318	#N/A	#N/A	#N/A	#N/A	#N/A	#N/A	#N/A		0	0	0	3	0	0	1	0	0	0	0	3														0.3	0.9
77536-66-4	-	-	Actinolite	77536-66-4	77536-66-4	#N/A	#N/A	#N/A	#N/A	Classified CMR according to Annex VI of Regulation 1272/2008	Carc. 1A STOT RE 1	H350 H372 **	H350 H372 **	#N/A	#N/A	#N/A	#N/A	#N/A	#N/A		0	0	0	3	1	0	0	0	0	0	0	3														1	3
77536-67-5	-	-	Anthophyllite	77536-67-5	77536-67-5	#N/A	#N/A	#N/A	#N/A	Classified CMR according to Annex VI of Regulation 1272/2008	Carc. 1A STOT RE 1	H350 H372 **	H350 H372 **	#N/A	#N/A	#N/A	#N/A	#N/A	#N/A		0	0	0	3	1	0	0	0	0	0	0	3														1	3
77536-68-6	-	-	Tremolite	77536-68-6	77536-68-6	#N/A	#N/A	#N/A	#N/A	Classified CMR according to Annex VI of Regulation 1272/2008	Carc. 1A STOT RE 1	H350 H372 **	H350 H372 **	#N/A	#N/A	#N/A	#N/A	#N/A	#N/A		0	0	0	3	1	0	0	0	0	0	0	3														1	3
NoCas3	-	-	e-glass microfibres of representative composition; [Calcium-aluminium-silicate fibres with random orientation with the following representative composition (% given by weight): SiO2 50,0-56,0 %, Al2O3 13,0-16,0 %, B2O3 5,8-10,0 %, Na2O < 0,6 %, K2O < 0,4 %, CaO 15,0-24,0 %, MgO < 5,5 %, Fe2O3 < 0,5 %, F2 < 1,0 %. Process: typically produced by flame attenuation and rotary process. (Additional ind…	NoCas3	#N/A	#N/A	#N/A	#N/A	#N/A	Substance is agreed by RAC to be a classified CMR according to Annex VI of Regulation 1272/2008, however it is not yet formally included.	Carc 1B	H350i	#N/A	#N/A	#N/A	#N/A	#N/A	#N/A	#N/A		0	0	0	3	1	0	0	0	0	0	0	3														0.3	0.9
189-55-9	-	205-877-5	Benzo[rst]pentaphene	205-877-5	#N/A	#N/A	#N/A	#N/A	#REF!	Classified CMR according to Annex VI of Regulation 1272/2008	Carc. 1B_x000D_ Muta. 2	H350_x000D_ H341	#N/A	#N/A	#N/A	#N/A	#N/A	#N/A	#N/A		0	0	0	3	1	1	0	0	0	0	0	3														0.3	0.9
22673-19-4	-	245-152-0	dibutylbis(pentane-2,4-dionatoO,O')tin	245-152-0	#N/A	#N/A	#N/A	#N/A	#REF!	Classified CMR according to Annex VI of Regulation 1272/2008	Repr. 1B_x000D_ STOT RE 1	H360FD_x000D_ H372 (immune system)	#N/A	#N/A	#N/A	#N/A	#N/A	#N/A	#N/A		0	0	0	3	0	0	1	0	0	0	0	3														0.3	0.9
71850-09-4	-	276-090-2	Diisohexyl phthalate	276-090-2	#N/A	#N/A	#N/A	#N/A	#REF!	Classified CMR according to Annex VI of Regulation 1272/2008	Repr. 1B	H360fD	#N/A	#N/A	#N/A	#N/A	#N/A	#N/A	#N/A		0	0	0	3	0	0	1	0	0	0	0	3														0.3	0.9
776297-69-9	-	-	N-pentyl-isopentylphthalate	-	#N/A	#N/A	#N/A	#N/A	#REF!	Classified CMR according to Annex VI of Regulation 1272/2008	Repr. 1B Aquatic Acute 1	H360FD H400	#N/A	#N/A	#N/A	#N/A	#N/A	#N/A	#N/A		0	0	0	3	0	0	1	0	0	0	0	3														0.3	0.9
50-00-0	200-001-8	200-001-8	Formaldehyde	200-001-8	#N/A	#N/A	#N/A	200-001-8	#REF!	Formaldehyde is classified as a possible carcinogen (C3), also reported to be mutagenic and toxic for reproduction. It is has been detected in both humans and the environment.	Carc. 1B Muta. 2 Acute Tox. 3* Acute Tox. 3* Acute Tox. 3* Skin Corr. 1B Skin Sens. 1	H350 H341 H301 H311 H331 H314 H317	#N/A	#N/A	#N/A	#N/A	H350 H341 H331 H311 H301 H314 H317	CMR#Exposure of workers#High (aggregated) tonnage#Wide dispersive use	#N/A		0	0	0	3	1	1	0	0	0	0	0	3														0.5	1.5
51-79-6	200-123-1	200-123-1	Urethane	200-123-1	#N/A	#N/A	#N/A	#N/A	#REF!	Classified CMR according to Annex VI of Regulation 1272/2008	Carc. 1B	H350	#N/A	#N/A	#N/A	#N/A	#N/A	#N/A	#N/A		0	0	0	3	1	0	0	0	0	0	0	3														0.3	0.9
57-57-8	200-340-1	200-340-1	Propiolactone	200-340-1	#N/A	#N/A	#N/A	#N/A	#REF!	Classified CMR according to Annex VI of Regulation 1272/2008	Carc. 1B Acute Tox. 2 * Eye Irrit. 2 Skin Irrit. 2	H350 H330 H319 H315	#N/A	#N/A	#N/A	#N/A	#N/A	#N/A	#N/A		0	0	0	3	1	0	0	0	0	0	0	3														0.3	0.9
59-88-1	200-444-7	200-444-7	Phenylhydrazinium chloride	200-444-7	#N/A	#N/A	#N/A	#N/A	#REF!	Classified CMR according to Annex VI of Regulation 1272/2008	Carc. 1B Muta. 2 Acute Tox. 3 * Acute Tox. 3 * Acute Tox. 3 * STOT RE 1 Eye Irrit. 2 Skin Irrit. 2 Skin Sens. 1 Aquatic Acute 1	H350 H341 H331 H311 H301 H372 ** H319 H315 H317 H400	#N/A	#N/A	#N/A	#N/A	#N/A	#N/A	#N/A		0	0	0	3	1	1	0	0	0	0	0	3														0.3	0.9
60-34-4	200-471-4	200-471-4	methylhydrazine	200-471-4	#N/A	#N/A	#N/A	#N/A	#REF!	Substance is agreed by RAC to be a classified CMR according to Annex VI of Regulation 1272/2008, however it is not yet formally included.	Carc. 1B	H350	#N/A	#N/A	#N/A	#N/A	#N/A	#N/A	#N/A		0	0	0	3	1	0	0	0	0	0	0	3														0.3	0.9
64-67-5	200-589-6	200-589-6	Diethyl sulphate	200-589-6	#N/A	200-589-6	#N/A	#N/A	#REF!	Classified CMR according to Annex VI of Regulation 1272/2008	Carc. 1B Muta. 1B Acute Tox. 4 * Acute Tox. 4 * Acute Tox. 4 * Skin Corr. 1B	H350 H340 H332 H312 H302 H314	#N/A	H350 H340 H332 H312 H302 H314	Carcinogenic (Article 57a)#Mutagenic (Article 57b)	#N/A	#N/A	#N/A	#N/A		0	0	0	3	1	1	0	0	0	0	0	3														1	3
64-86-8	200-598-5	200-598-5	colchicine	200-598-5	#N/A	#N/A	#N/A	#N/A	#REF!	Classified CMR according to Annex VI of Regulation 1272/2008	Muta. 1B Acute Tox. 2 *	H340 H300	#N/A	#N/A	#N/A	#N/A	#N/A	#N/A	#N/A		0	0	0	3	0	1	0	0	0	0	0	3														0.3	0.9
71-43-2	200-753-7	200-753-7	Benzene	200-753-7	200-753-7	#N/A	#N/A	#N/A	#REF!	Classified CMR according to Annex VI of Regulation 1272/2008	Flam. Liq. 2 Carc. 1A Muta. 1B STOT RE 1 Asp. Tox. 1 Eye Irrit. 2 Skin Irrit. 2	H225 H350 H340 H372 ** H304 H319 H315	H225 H350 H340 H304 H372 ** H315 H319	#N/A	#N/A	#N/A	#N/A	#N/A	#N/A		0	0	0	3	1	1	0	0	0	0	0	3														1	3
75-01-4	200-831-0	200-831-0	Chloroethylene	200-831-0	200-831-0	#N/A	#N/A	#N/A	#REF!	Classified CMR (Class I & II) according to Annex 1 of Directive 67/548/EEC	Press. Gas Flam. Gas 1 Carc. 1A	H220 H350	H220 H350	#N/A	#N/A	#N/A	#N/A	#N/A	#N/A		0	0	0	3	1	0	0	0	0	0	0	3														1	3
75-07-0	-	200-836-8	Acetaldehyde	200-836-8	#N/A	#N/A	#N/A	#N/A	#REF!	Classified CMR according to Annex VI of Regulation 1272/2008	Flam. Liq. 1_x000D_ Carc. 1B_x000D_ Muta. 2_x000D_ STOT SE 3_x000D_ Eye Irrit. 2	H224_x000D_ H350_x000D_ H341_x000D_ H335_x000D_ H319	#N/A	#N/A	#N/A	#N/A	#N/A	#N/A	#N/A		0	0	0	3	1	1	0	0	0	0	0	3														0.3	0.9
75-12-7	200-842-0	200-842-0	Formamide	200-842-0	#N/A	200-842-0	#N/A	#N/A	#REF!	Classified CMR (Class I & II) according to Annex 1 of Directive 67/548/EEC	Repr. 1B	H360D ***	#N/A	H360D ***	Toxic for reproduction (Article 57c)	#N/A	#N/A	#N/A	#N/A		0	0	0	3	0	0	1	0	0	0	0	3														1	3
75-21-8	200-849-9	200-849-9	Ethylene oxide	200-849-9	#N/A	#N/A	#N/A	200-849-9	#REF!	Classified CMR according to Annex VI of Regulation 1272/2008	Press. Gas Flam. Gas 1 Carc. 1B Muta. 1B Acute Tox. 3 * Eye Irrit. 2 STOT SE 3 Skin Irrit. 2	H220 H350 H340 H331 H319 H335 H315	#N/A	#N/A	#N/A	#N/A	H220 H350 H340 H331 H335 H315 H319	CMR#High (aggregated) tonnage	#N/A		0	0	0	3	1	1	0	0	0	0	0	3														0.5	1.5
75-26-3	200-855-1	200-855-1	2-bromopropane	200-855-1	#N/A	#N/A	#N/A	#N/A	#REF!	Classified CMR according to Annex VI of Regulation 1272/2008	Flam. Liq. 2 Repr. 1A STOT RE 2 *	H225 H360F *** H373 **	#N/A	#N/A	#N/A	#N/A	#N/A	#N/A	#N/A		0	0	0	3	0	0	1	0	0	0	0	3														0.3	0.9
75-56-9	200-879-2	200-879-2	Methyloxirane	200-879-2	#N/A	200-879-2	#N/A	#N/A	#REF!	Classified CMR according to Annex VI of Regulation 1272/2008	Flam. Liq. 1 Carc. 1B Muta. 1B Acute Tox. 4 * Acute Tox. 4 * Acute Tox. 4 * Eye Irrit. 2 STOT SE 3 Skin Irrit. 2	H224 H350 H340 H332 H312 H302 H319 H335 H315	#N/A	H224 H350 H340 H331 H311 H302 H335 H319	Carcinogenic (Article 57a)#Mutagenic (Article 57b)	#N/A	#N/A	#N/A	#N/A		0	0	0	3	1	1	0	0	0	0	0	3														1	3
77-78-1	201-058-1	201-058-1	Dimethyl sulphate	201-058-1	#N/A	201-058-1	#N/A	#N/A	#REF!	Classified CMR according to Annex VI of Regulation 1272/2008	Carc. 1B Muta. 2 Acute Tox. 2 * Acute Tox. 3 * Skin Corr. 1B Skin Sens. 1	H350 H341 H330 H301 H314 H317	#N/A	H350 H341 H330 H301 H314 H317	Carcinogenic (Article 57a)	#N/A	#N/A	#N/A	#N/A		0	0	0	3	1	1	0	0	0	0	0	3														1	3
78-59-1	201-126-0	201-126-0	3,5,5-trimethylcyclohex-2-enone	#N/A	#N/A	#N/A	#N/A	201-126-0	#REF!	#N/A	#N/A	#N/A	#N/A	#N/A	#N/A	#N/A	H351 H312 H302 H335 H319	CMR#Exposure of workers#High (aggregated) tonnage#Wide dispersive use	#N/A		0	0	0	3	1	0	0	0	0	0	0	3														0.5	1.5
78-87-5	201-152-2	201-152-2	1,2-dichloropropane; propylene dichloride	201-152-2	#N/A	#N/A	#N/A	#N/A	#REF!	Substance is agreed by RAC to be a classified CMR according to Annex VI of Regulation 1272/2008, however it is not yet formally included.	Flam. Liq. 2 Carc. 1B Acute Tox. 4 * Acute Tox. 4 *	H225 H350 H332 H302	#N/A	#N/A	#N/A	#N/A	#N/A	#N/A	#N/A		0	0	0	3	1	0	0	0	0	0	0	3														0.3	0.9
79-06-1	201-173-7	201-173-7	Acrylamide	201-173-7	201-173-7	201-173-7	#N/A	#N/A	#REF!	Classified CMR (Class I & II) according to Annex 1 of Directive 67/548/EEC	Carc. 1B Muta. 1B Repr. 2 Acute Tox. 3 * STOT RE 1 Acute Tox. 4 * Acute Tox. 4 * Eye Irrit. 2 Skin Irrit. 2 Skin Sens. 1	H350 H340 H361f *** H301 H372 ** H332 H312 H319 H315 H317	H350 H340 H361f *** H301 H332 H312 H372 ** H315 H319 H317	H350 H340 H361f *** H301 H332 H312 H372 ** H315 H319 H317	Carcinogenic (Article 57a)#Mutagenic (Article 57b)	#N/A	#N/A	#N/A	#N/A		0	0	0	3	1	1	1	0	0	0	0	3														1	3
79-16-3	201-182-6	201-182-6	N-methylacetamide	201-182-6	#N/A	201-182-6	#N/A	#N/A	#REF!	Classified CMR according to Annex VI of Regulation 1272/2008	Repr. 1B	H360D ***	#N/A	H360D ***	Toxic for reproduction (Article 57c)	#N/A	#N/A	#N/A	#N/A		0	0	0	3	0	0	1	0	0	0	0	3														1	3
79-46-9	201-209-1	201-209-1	2-nitropropane	201-209-1	#N/A	#N/A	#N/A	#N/A	#REF!	Classified CMR according to Annex VI of Regulation 1272/2008	Flam. Liq. 3 Carc. 1B Acute Tox. 4 * Acute Tox. 4 *	H226 H350 H332 H302	#N/A	#N/A	#N/A	#N/A	#N/A	#N/A	#N/A		0	0	0	3	1	0	0	0	0	0	0	3														0.3	0.9
80-05-7	201-245-8	201-245-8	Bisphenol A	201-245-8	201-245-8	201-245-8	#N/A	201-245-8	#REF!	Bisphenol A is classified as being toxic to reproduction and has been identified as an SVHC due to its endocrine disrupting properties for human health and the environment.	Repr. 2 STOT SE 3 Eye Dam. 1 Skin Sens. 1	H361f*** H335 H318 H317	H360F H335 H318 H317	H360F H335 H318 H317	Toxic for reproduction (Article 57c)#Endocrine disrupting properties (Article 57(f) - environment)#Endocrine disrupting properties (Article 57(f) - human health)	#N/A	H360F H335 H318 H317	Potential endocrine disruptor#Consumer use#High (aggregated) tonnage#Wide dispersive use	CAT1		0	0	0	0	0	0	1	1	1	0	0	3														1	3
80-54-6	201-289-8	201-289-8	2-(4-tert-butylbenzyl)propionaldehyde	#N/A	#N/A	#N/A	#N/A	201-289-8	#REF!	#N/A	#N/A	#N/A	#N/A	#N/A	#N/A	#N/A	#N/A	CMR#Consumer use#Wide dispersive use	#N/A		0	0	0	3	0	0	0	0	0	0	0	3														0.5	1.5
84-61-7	201-545-9	201-545-9	dicyclohexyl phthalate (DCHP)	201-545-9	#N/A	201-545-9	#N/A	201-545-9	#REF!	Dicyclohexyl phthalate (DCHP) is an endocrine disruptor with estrogenic, thyroid and antiandrogen activity, affecting several body functions including reproduction, behaviour, nervous system and metabolism. The substance has been found in indoor dust and	Official classification missing - 57f substance	#N/A	#N/A	H360D H317	Toxic for reproduction (Article 57c)#Endocrine disrupting properties (Article 57(f) - human health)	#N/A	H360D H317	Potential endocrine disruptor#Exposure of environment#Wide dispersive use	CAT1		0	0	0	0	0	0	1	1	1	0	0	3														1	3
84-65-1	201-549-0	201-549-0	anthraquinone	201-549-0	#N/A	#N/A	#N/A	#N/A	#REF!	Substance is agreed by RAC to be a classified CMR according to Annex VI of Regulation 1272/2008, however it is not yet formally included.	Carc. 1B	H350	#N/A	#N/A	#N/A	#N/A	#N/A	#N/A	#N/A		0	0	0	3	1	0	0	0	0	0	0	3														0.3	0.9
87-86-5	201-778-6	201-778-6	pentachlorophenol (PCP)	201-778-6	201-778-6	#N/A	#N/A	#N/A	#REF!	Pentachlorophenol is an endocrine disruptor with antiestrogen and thyroid activity, affecting several body functions including reproduction, brain development and metabolism. The substance has been found in biomonitoring studies and in human blood. It is	Carc. 2 Acute Tox. 2 * Acute Tox. 3 * Acute Tox. 3 * Eye Irrit. 2 STOT SE 3 Skin Irrit. 2 Aquatic Acute 1 Aquatic Chronic 1	H351 H330 H311 H301 H319 H335 H315 H400 H410	H351 H330 H311 H301 H335 H315 H319 H400 H410	#N/A	#N/A	#N/A	#N/A	#N/A	CAT1		0	0	1	0	1	0	0	0	1	0	0	3														1	3
90-04-0	201-963-1	201-963-1	O-anisidine	201-963-1	#N/A	201-963-1	#N/A	#N/A	#REF!	Classified CMR according to Annex VI of Regulation 1272/2008	Carc. 1B Muta. 2 Acute Tox. 3 * Acute Tox. 3 * Acute Tox. 3 *	H350 H341 H331 H311 H301	#N/A	H350 H341 H331 H311 H301	Carcinogenic (Article 57a)	#N/A	#N/A	#N/A	#N/A		0	0	0	3	1	1	0	0	0	0	0	3														1	3
90-94-8	202-027-5	202-027-5	4,4'-bis(dimethylamino)benzophenone	202-027-5	#N/A	202-027-5	#N/A	#N/A	#REF!	Classified CMR according to Annex VI of Regulation 1272/2008	Carc. 1B Muta. 2 Eye Dam. 1	H350 H341 H318	#N/A	H350 H341 H318	Carcinogenic (Article 57a)	#N/A	#N/A	#N/A	#N/A		0	0	0	3	1	1	0	0	0	0	0	3														1	3
91-20-3	202-049-5	202-049-5	Naphthalene	202-049-5	#N/A	#N/A	#N/A	202-049-5	#REF!	Naphtalene is classified as possible carcinogen (C3) and very toxic to aquatic organisms. It has been reported to have endocrine disrupting effects and it has been detected in the environment and humans.	Carc. 2 Acute Tox. 4 * Aquatic Acute 1 Aquatic Chronic 1	H351 H302 H400 H410	#N/A	#N/A	#N/A	#N/A	H351 H302 H400 H410	Exposure of workers#High (aggregated) tonnage#High RCR#Other exposure/risk based concern	#N/A		0	0	1	0	1	0	0	0	1	0	0	3														0.5	1.5
91-23-6	202-052-1	202-052-1	2-nitroanisole	202-052-1	#N/A	#N/A	#N/A	#N/A	#REF!	Classified CMR according to Annex VI of Regulation 1272/2008	Carc. 1B Acute Tox. 4 *	H350 H302	#N/A	#N/A	#N/A	#N/A	#N/A	#N/A	#N/A		0	0	0	3	1	0	0	0	0	0	0	3														0.3	0.9
91-95-2	202-110-6	202-110-6	biphenyl-3,3',4,4'-tetrayltetraamine	202-110-6	#N/A	#N/A	#N/A	#N/A	#REF!	Classified CMR according to Annex VI of Regulation 1272/2008	Carc. 1B Muta. 2	H350 H341	#N/A	#N/A	#N/A	#N/A	#N/A	#N/A	#N/A		0	0	0	3	1	1	0	0	0	0	0	3														0.3	0.9
92-67-1	202-177-1	202-177-1	Biphenyl-4-ylamine	202-177-1	202-177-1	202-177-1	#N/A	#N/A	#REF!	Classified CMR according to Annex VI of Regulation 1272/2008	Carc. 1A Acute Tox. 4 *	H350 H302	H350 H302	H350 H302	Carcinogenic (Article 57a)	#N/A	#N/A	#N/A	#N/A		0	0	0	3	1	0	0	0	0	0	0	3														1	3
94-59-7	202-345-4	202-345-4	5-allyl-1,3-benzodioxole	202-345-4	#N/A	#N/A	#N/A	#N/A	#REF!	Classified CMR according to Annex VI of Regulation 1272/2008	Carc. 1B Muta. 2 Acute Tox. 4 *	H350 H341 H302	#N/A	#N/A	#N/A	#N/A	#N/A	#N/A	#N/A		0	0	0	3	1	1	0	0	0	0	0	3														0.3	0.9
95-53-4	202-429-0	202-429-0	O-toluidine	202-429-0	#N/A	202-429-0	#N/A	#N/A	#REF!	Classified CMR according to Annex VI of Regulation 1272/2008	Carc. 1B Acute Tox. 3 * Acute Tox. 3 * Eye Irrit. 2 Aquatic Acute 1	H350 H331 H301 H319 H400	#N/A	H350 H331 H301 H319 H400	Carcinogenic (Article 57a)	#N/A	#N/A	#N/A	#N/A		0	0	0	3	1	0	0	0	0	0	0	3														1	3
96-09-3	202-476-7	202-476-7	(epoxyethyl)benzene	202-476-7	#N/A	#N/A	#N/A	#N/A	#REF!	Classified CMR (Class I & II) according to Annex 1 of Directive 67/548/EEC	Carc. 1B Acute Tox. 4 * Eye Irrit. 2	H350 H312 H319	#N/A	#N/A	#N/A	#N/A	#N/A	#N/A	#N/A		0	0	0	3	1	0	0	0	0	0	0	3														0.3	0.9
96-23-1	202-491-9	202-491-9	1,3-dichloropropan-2-ol	202-491-9	#N/A	#N/A	#N/A	#N/A	#REF!	Classified CMR according to Annex VI of Regulation 1272/2008	Carc. 1B Acute Tox. 3 * Acute Tox. 4 *	H350 H301 H312	#N/A	#N/A	#N/A	#N/A	#N/A	#N/A	#N/A		0	0	0	3	1	0	0	0	0	0	0	3														0.3	0.9
97-56-3	202-591-2	202-591-2	4-o-tolylazo-o-toluidine	202-591-2	#N/A	202-591-2	#N/A	#N/A	#REF!	Classified CMR according to Annex VI of Regulation 1272/2008	Carc. 1B Skin Sens. 1	H350 H317	#N/A	H350 H317	Carcinogenic (Article 57a)	#N/A	#N/A	#N/A	#N/A		0	0	0	3	1	0	0	0	0	0	0	3														1	3
97-99-4	202-625-6	202-625-6	Tetrahydrofurfuryl alcohol	202-625-6	#N/A	#N/A	#N/A	#N/A	#REF!	Classified CMR according to Annex VI of Regulation 1272/2008	Eye Irrit. 2 Repr. 1B	H319 H360Df	#N/A	#N/A	#N/A	#N/A	#N/A	#N/A	#N/A		0	0	0	3	0	0	1	0	0	0	0	3														0.3	0.9
98-00-0	202-626-1	202-626-1	Furfuryl alcohol	#N/A	#N/A	#N/A	#N/A	202-626-1	#REF!	#N/A	#N/A	#N/A	#N/A	#N/A	#N/A	#N/A	H351 H331 H312 H302 H335 H373 ** H319	CMR#Consumer use#Exposure of environment#Exposure of workers#High (aggregated) tonnage#Wide dispersive use	#N/A		0	0	0	3	1	0	0	0	0	0	0	3														0.5	1.5
98-07-7	202-634-5	202-634-5	a,a,a-trichlorotoluene	202-634-5	#N/A	#N/A	#N/A	#N/A	#REF!	Classified CMR (Class I & II) according to Annex 1 of Directive 67/548/EEC	Carc. 1B Acute Tox. 3 * Acute Tox. 4 * STOT SE 3 Skin Irrit. 2 Eye Dam. 1	H350 H331 H302 H335 H315 H318	#N/A	#N/A	#N/A	#N/A	#N/A	#N/A	#N/A		0	0	0	3	1	0	0	0	0	0	0	3														0.3	0.9
98-73-7	202-696-3	202-696-3	4-tert-butylbenzoic acid	202-696-3	#N/A	#N/A	#N/A	#N/A	#REF!	Classified CMR according to Annex VI of Regulation 1272/2008	Repr. 1B STOT RE 1 Acute Tox. 4	H360F H372 H302	#N/A	#N/A	#N/A	#N/A	#N/A	#N/A	#N/A		0	0	0	3	0	0	1	0	0	0	0	3														0.3	0.9
100-44-7	202-853-6	202-853-6	a-chlorotoluene	202-853-6	#N/A	#N/A	#N/A	#N/A	#REF!	Classified CMR according to Annex VI of Regulation 1272/2008	Carc. 1B Acute Tox. 3 * Acute Tox. 4 * STOT RE 2 * STOT SE 3 Skin Irrit. 2 Eye Dam. 1	H350 H331 H302 H373 ** H335 H315 H318	#N/A	#N/A	#N/A	#N/A	#N/A	#N/A	#N/A		0	0	0	3	1	0	0	0	0	0	0	3														0.3	0.9
100-63-0	202-873-5	202-873-5	Phenylhydrazine	202-873-5	#N/A	#N/A	#N/A	#N/A	#REF!	Classified CMR according to Annex VI of Regulation 1272/2008	Carc. 1B Muta. 2 Acute Tox. 3 * Acute Tox. 3 * Acute Tox. 3 * STOT RE 1 Eye Irrit. 2 Skin Irrit. 2 Skin Sens. 1 Aquatic Acute 1	H350 H341 H331 H311 H301 H372 ** H319 H315 H317 H400	#N/A	#N/A	#N/A	#N/A	#N/A	#N/A	#N/A		0	0	0	3	1	1	0	0	0	0	0	3														0.3	0.9
104-93-8	203-253-7	203-253-7	4-methylanisole	#N/A	#N/A	#N/A	#N/A	203-253-7	#REF!	#N/A	#N/A	#N/A	#N/A	#N/A	#N/A	#N/A	#N/A	CMR#Consumer use#High RCR#Wide dispersive use	#N/A		0	0	0	3	0	0	0	0	0	0	0	3														0.5	1.5
106-91-2	203-441-9	203-441-9	2,3-epoxypropyl methacrylate; glycidyl methacrylate	203-441-9	#N/A	#N/A	#N/A	#N/A	#REF!	Substance is agreed by RAC to be a classified CMR according to Annex VI of Regulation 1272/2008, however it is not yet formally included.	Carc. 1B Muta. 2 Repr. 1B Acute Tox. 3Acute Tox. 4STOT SE 3STOT RE 1 Eye Dam. 1 Skin Corr. 1C Skin Sens. 1	H350 H341 H360F H311 H302 H335 H372(respiratory tract) (inhalation) H318H314 H317	#N/A	#N/A	#N/A	#N/A	#N/A	#N/A	#N/A		0	0	0	3	1	1	1	0	0	0	0	3														0.3	0.9
106-94-5	203-445-0	203-445-0	1-bromopropane	203-445-0	#N/A	203-445-0	203-445-0	#N/A	#REF!	Classified CMR according to Annex VI of Regulation 1272/2008	Flam. Liq. 2 Repr. 1B STOT RE 2 * Eye Irrit. 2 STOT SE 3 Skin Irrit. 2 STOT SE 3	H225 H360FD H373 ** H319 H335 H315 H336	#N/A	H225 H360FD H335 H336 H373 ** H315 H319	Toxic for reproduction (Article 57c)	H225 H360FD H335 H336 H373 ** H315 H319	#N/A	#N/A	#N/A		0	0	0	3	0	0	1	0	0	0	0	3														1	3
106-99-0	203-450-8	203-450-8	Buta-1,3-diene	203-450-8	#N/A	#N/A	#N/A	203-450-8	#REF!	Classified CMR according to Annex VI of Regulation 1272/2008	Flam. Gas 1 Press. Gas Carc. 1A Muta. 1B	H220 H350 H340	#N/A	#N/A	#N/A	#N/A	H220 H350 H340	CMR#Other exposure/risk based concern	#N/A		0	0	0	3	1	1	0	0	0	0	0	3														0.5	1.5
107-06-2	203-458-1	203-458-1	1,2-dichloroethane	203-458-1	#N/A	203-458-1	203-458-1	#N/A	#REF!	Classified CMR according to Annex VI of Regulation 1272/2008	Flam. Liq. 2 Carc. 1B Acute Tox. 4 * Eye Irrit. 2 STOT SE 3 Skin Irrit. 2	H225 H350 H302 H319 H335 H315	#N/A	H225 H350 H302 H335 H315 H319	Carcinogenic (Article 57a)	H225 H350 H302 H335 H315 H319	#N/A	#N/A	#N/A		0	0	0	3	1	0	0	0	0	0	0	3														1	3
107-30-2	203-480-1	203-480-1	Chloromethyl methyl ether	203-480-1	#N/A	#N/A	#N/A	#N/A	#REF!	Classified CMR according to Annex VI of Regulation 1272/2008	Flam. Liq. 2 Carc. 1A Acute Tox. 4 * Acute Tox. 4 * Acute Tox. 4 *	H225 H350 H332 H312 H302	#N/A	#N/A	#N/A	#N/A	#N/A	#N/A	#N/A		0	0	0	3	1	0	0	0	0	0	0	3														0.3	0.9
109-86-4	203-713-7	203-713-7	2-methoxyethanol	203-713-7	#N/A	203-713-7	#N/A	#N/A	#REF!	Classified CMR according to Annex VI of Regulation 1272/2008	Flam. Liq. 3 Repr. 1B Acute Tox. 4 * Acute Tox. 4 * Acute Tox. 4 *	H226 H360FD H332 H312 H302	#N/A	H226 H360FD H332 H312 H302	Toxic for reproduction (Article 57c)	#N/A	#N/A	#N/A	#N/A		0	0	0	3	0	0	1	0	0	0	0	3														1	3
109-99-9	203-726-8	203-726-8	Tetrahydrofuran	#N/A	#N/A	#N/A	#N/A	203-726-8	#REF!	#N/A	#N/A	#N/A	#N/A	#N/A	#N/A	#N/A	H225 H351 H335 H319	CMR#Consumer use#Exposure of workers#High (aggregated) tonnage#Wide dispersive use	#N/A		0	0	0	3	1	0	0	0	0	0	0	3														0.5	1.5
110-05-4	203-733-6	203-733-6	Di-tert-butyl peroxide	#N/A	#N/A	#N/A	#N/A	203-733-6	#REF!	#N/A	#N/A	#N/A	#N/A	#N/A	#N/A	#N/A	H225 H242 H341	CMR#Consumer use#High (aggregated) tonnage#Wide dispersive use	#N/A		0	0	0	3	0	1	0	0	0	0	0	3														0.5	1.5
110-49-6	203-772-9	203-772-9	2-methoxyethyl acetate	203-772-9	#N/A	203-772-9	#N/A	#N/A	#REF!	Classified CMR according to Annex VI of Regulation 1272/2008	Repr. 1B Acute Tox. 4 * Acute Tox. 4 * Acute Tox. 4 *	H360FD H332 H312 H302	#N/A	H360FD H332 H312 H302	Toxic for reproduction (Article 57c)	#N/A	#N/A	#N/A	#N/A		0	0	0	3	0	0	1	0	0	0	0	3														1	3
110-71-4	203-794-9	203-794-9	1,2-dimethoxyethane	203-794-9	#N/A	203-794-9	#N/A	#N/A	#REF!	Classified CMR according to Annex VI of Regulation 1272/2008	Flam. Liq. 2 Repr. 1B Acute Tox. 4 *	H225 H360FD H332	#N/A	H225 H360FD H332	Toxic for reproduction (Article 57c)	#N/A	#N/A	#N/A	#N/A		0	0	0	3	0	0	1	0	0	0	0	3														1	3
110-80-5	203-804-1	203-804-1	2-ethoxyethanol	203-804-1	#N/A	203-804-1	#N/A	#N/A	#REF!	Classified CMR according to Annex VI of Regulation 1272/2008	Flam. Liq. 3 Repr. 1B Acute Tox. 4 * Acute Tox. 4 * Acute Tox. 4 *	H226 H360FD H332 H312 H302	#N/A	H226 H360FD H331 H302	Toxic for reproduction (Article 57c)	#N/A	#N/A	#N/A	#N/A		0	0	0	3	0	0	1	0	0	0	0	3														1	3
111-15-9	203-839-2	203-839-2	2-ethoxyethyl acetate	203-839-2	#N/A	203-839-2	#N/A	#N/A	#REF!	Classified CMR according to Annex VI of Regulation 1272/2008	Flam. Liq. 3 Repr. 1B Acute Tox. 4 * Acute Tox. 4 * Acute Tox. 4 *	H226 H360FD H332 H312 H302	#N/A	H226 H360FD H332 H312 H302	Toxic for reproduction (Article 57c)	#N/A	#N/A	#N/A	#N/A		0	0	0	3	0	0	1	0	0	0	0	3														1	3
111-41-1	203-867-5	203-867-5	2-(2-aminoethylamino)ethanol	203-867-5	#N/A	#N/A	#N/A	#N/A	#REF!	Classified CMR according to Annex VI of Regulation 1272/2008	Repr. 1B Skin Corr. 1B Skin Sens. 1	H360Fd H361 H314 H317	#N/A	#N/A	#N/A	#N/A	#N/A	#N/A	#N/A		0	0	0	3	0	0	1	0	0	0	0	3														0.3	0.9
111-96-6	203-924-4	203-924-4	Bis(2-methoxyethyl) ether	203-924-4	#N/A	203-924-4	203-924-4	#N/A	#REF!	Classified CMR according to Annex VI of Regulation 1272/2008	Flam. Liq. 3 Repr. 1B	H226 H360FD	#N/A	H226 H360FD	Toxic for reproduction (Article 57c)	H226 H360FD	#N/A	#N/A	#N/A		0	0	0	3	0	0	1	0	0	0	0	3														1	3
112-49-2	203-977-3	203-977-3	1,2-bis(2-methoxyethoxy)ethane	203-977-3	#N/A	203-977-3	#N/A	#N/A	#REF!	Classified CMR according to Annex VI of Regulation 1272/2008	Repr. 1B	H360Df	#N/A	H360Df	Toxic for reproduction (Article 57c)	#N/A	#N/A	#N/A	#N/A		0	0	0	3	0	0	1	0	0	0	0	3														1	3
117-82-8	204-212-6	204-212-6	Bis(2-methoxyethyl) phthalate	204-212-6	#N/A	204-212-6	204-212-6	#N/A	#REF!	Classified CMR according to Annex VI of Regulation 1272/2008	Repr. 1B	H360Df	#N/A	H360Df	Toxic for reproduction (Article 57c)	H360Df	#N/A	#N/A	#N/A		0	0	0	3	0	0	1	0	0	0	0	3														1	3
119-90-4	204-355-4	204-355-4	3,3'-dimethoxybenzidine	204-355-4	#N/A	#N/A	#N/A	#N/A	#REF!	Classified CMR according to Annex VI of Regulation 1272/2008	Carc. 1B Acute Tox. 4 *	H350 H302	#N/A	#N/A	#N/A	#N/A	#N/A	#N/A	#N/A		0	0	0	3	1	0	0	0	0	0	0	3														0.3	0.9
120-71-8	204-419-1	204-419-1	6-methoxy-m-toluidine	204-419-1	#N/A	204-419-1	#N/A	#N/A	#REF!	Classified CMR according to Annex VI of Regulation 1272/2008	Carc. 1B Acute Tox. 4 *	H350 H302	#N/A	H350 H302	Carcinogenic (Article 57a)	#N/A	#N/A	#N/A	#N/A		0	0	0	3	1	0	0	0	0	0	0	3														1	3
120-80-9	-	204-427-5	1,2-dihydroxybenzene	204-427-5	#N/A	#N/A	#N/A	#N/A	#REF!	Classified CMR according to Annex VI of Regulation 1272/2008	Carc. 1?_x000D_ Muta. 2_x000D_ Acute Tox. 3_x000D_ Acute Tox. 3_x000D_ Skin Irrit. 2_x000D_ Eye Irrit. 2	H350_x000D_ H341_x000D_ H311_x000D_ H301_x000D_ H315_x000D_ H319	#N/A	#N/A	#N/A	#N/A	#N/A	#N/A	#N/A		0	0	0	3	1	1	0	0	0	0	0	3														0.3	0.9
123-31-9	204-617-8	204-617-8	Hydroquinone	#N/A	#N/A	#N/A	#N/A	204-617-8	#REF!	#N/A	#N/A	#N/A	#N/A	#N/A	#N/A	#N/A	H351 H341 H302 H318 H317 H400	CMR#Consumer use#High (aggregated) tonnage#High RCR#Wide dispersive use	#N/A		0	0	0	3	1	1	0	0	0	0	0	3														0.5	1.5
123-39-7	204-624-6	204-624-6	N-methylformamide	204-624-6	#N/A	#N/A	#N/A	#N/A	#REF!	Classified CMR according to Annex VI of Regulation 1272/2008	Repr. 1B Acute Tox. 4 *	H360D *** H312	#N/A	#N/A	#N/A	#N/A	#N/A	#N/A	#N/A		0	0	0	3	0	0	1	0	0	0	0	3														0.3	0.9
126-99-8	204-818-0	204-818-0	2-chlorobuta-1,3-diene	204-818-0	#N/A	#N/A	#N/A	#N/A	#REF!	Classified CMR according to Annex VI of Regulation 1272/2008	Flam. Liq. 2 Carc. 1B Acute Tox. 4 * Acute Tox. 4 * STOT RE 2 * Eye Irrit. 2 STOT SE 3 Skin Irrit. 2	H225 H350 H332 H302 H373 ** H319 H335 H315	#N/A	#N/A	#N/A	#N/A	#N/A	#N/A	#N/A		0	0	0	3	1	0	0	0	0	0	0	3														0.3	0.9
127-19-5	204-826-4	204-826-4	N,N-dimethylacetamide	204-826-4	#N/A	204-826-4	#N/A	#N/A	#REF!	Classified CMR according to Annex VI of Regulation 1272/2008	Repr. 1B Acute Tox. 4 * Acute Tox. 4 *	H360D *** H332 H312	#N/A	H360D *** H332 H312	Toxic for reproduction (Article 57c)	#N/A	#N/A	#N/A	#N/A		0	0	0	3	0	0	1	0	0	0	0	3														1	3
132-32-1	205-057-7	205-057-7	3-amino-9-ethyl carbazole	205-057-7	#N/A	#N/A	#N/A	#N/A	#REF!	Classified CMR according to Annex VI of Regulation 1272/2008	Carc. 1B	H350	#N/A	#N/A	#N/A	#N/A	#N/A	#N/A	#N/A		0	0	0	3	1	0	0	0	0	0	0	3														0.3	0.9
140-66-9	205-426-2	205-426-2	4-(1,1,3,3-tetramethylbutyl)phenol	205-426-2	#N/A	205-426-2	#N/A	#N/A	#REF!	4-tert-octylphenol is an endocrine disruptor (cat 1) and adverse effects on reproductive systems has been reported. It is also persistent and it has been widely found in humans and the environment.	Skin Irrit. 2 Eye Dam. 1 Aquatic Acute 1 Aquatic Chronic 1	H315 H318 H400 H410	#N/A	H315 H318 H400 H410	Endocrine disrupting properties (Article 57(f) - environment)	#N/A	#N/A	#N/A	CAT1		0	0	1	0	0	0	0	1	1	0	0	3														1	3
149-57-5	205-743-6	205-743-6	2-ethylhexanoic acid	#N/A	#N/A	#N/A	#N/A	205-743-6	#REF!	#N/A	#N/A	#N/A	#N/A	#N/A	#N/A	#N/A	H361d ***	CMR#Consumer use#High (aggregated) tonnage#High RCR#Wide dispersive use	#N/A		0	0	0	3	0	0	1	0	0	0	0	3														0.5	1.5
288-32-4	206-019-2	206-019-2	Imidazole	206-019-2	#N/A	#N/A	#N/A	206-019-2	#REF!	Classified CMR according to Annex VI of Regulation 1272/2008	Repr. 1B	H360	#N/A	#N/A	#N/A	#N/A	H360D H302 H314	CMR#High (aggregated) tonnage#Wide dispersive use	#N/A		0	0	0	3	0	0	1	0	0	0	0	3														0.5	1.5
334-88-3	206-382-7	206-382-7	Diazomethane	206-382-7	#N/A	#N/A	#N/A	#N/A	#REF!	Classified CMR according to Annex VI of Regulation 1272/2008	Carc. 1B	H350	#N/A	#N/A	#N/A	#N/A	#N/A	#N/A	#N/A		0	0	0	3	1	0	0	0	0	0	0	3														0.3	0.9
542-56-3	208-819-7	208-819-7	Isobutyl nitrite	208-819-7	#N/A	#N/A	#N/A	#N/A	#REF!	Classified CMR according to Annex VI of Regulation 1272/2008	Flam. Liq. 2 Carc. 1B Muta. 2 Acute Tox. 4 * Acute Tox. 4 *	H225 H350 H341 H332 H302	#N/A	#N/A	#N/A	#N/A	#N/A	#N/A	#N/A		0	0	0	3	1	1	0	0	0	0	0	3														0.3	0.9
542-88-1	208-832-8	208-832-8	Oxybis[chloromethane]	208-832-8	#N/A	#N/A	#N/A	#N/A	#REF!	Classified CMR according to Annex VI of Regulation 1272/2008	Flam. Liq. 2 Carc. 1A Acute Tox. 2 * Acute Tox. 3 * Acute Tox. 4 *	H225 H350 H330 H311 H302	#N/A	#N/A	#N/A	#N/A	#N/A	#N/A	#N/A		0	0	0	3	1	0	0	0	0	0	0	3														0.3	0.9
556-52-5	209-128-3	209-128-3	2,3-epoxypropan-1-ol	209-128-3	#N/A	#N/A	#N/A	#N/A	#REF!	Classified CMR according to Annex VI of Regulation 1272/2008	Carc. 1B Muta. 2 Repr. 1B Acute Tox. 3 * Acute Tox. 4 * Acute Tox. 4 * Eye Irrit. 2 STOT SE 3 Skin Irrit. 2	H350 H341 H360F *** H331 H312 H302 H319 H335 H315	#N/A	#N/A	#N/A	#N/A	#N/A	#N/A	#N/A		0	0	0	3	1	1	1	0	0	0	0	3														0.3	0.9
569-61-9	209-321-2	209-321-2	4,4'-(4-iminocyclohexa-2,5-dienylidenemethylene)dianiline hydrochloride	209-321-2	#N/A	#N/A	#N/A	#N/A	#REF!	Classified CMR according to Annex VI of Regulation 1272/2008	Carc. 1B	H350	#N/A	#N/A	#N/A	#N/A	#N/A	#N/A	#N/A		0	0	0	3	1	0	0	0	0	0	0	3														0.3	0.9
573-58-0	209-358-4	209-358-4	Disodium 3,3'-[[1,1'-biphenyl]-4,4'-diylbis(azo)]bis(4-aminonaphthalene-1-sulphonate)	209-358-4	#N/A	209-358-4	#N/A	#N/A	#REF!	Classified CMR according to Annex VI of Regulation 1272/2008	Carc. 1B Repr. 2	H350 H361d ***	#N/A	H350 H361d ***	Carcinogenic (Article 57a)	#N/A	#N/A	#N/A	#N/A		0	0	0	3	1	0	1	0	0	0	0	3														1	3
592-62-1	209-765-7	209-765-7	(methyl-ONN-azoxy)methyl acetate	209-765-7	#N/A	#N/A	#N/A	#N/A	#REF!	Classified CMR according to Annex VI of Regulation 1272/2008	Carc. 1B Repr. 1B	H350 H360D ***	#N/A	#N/A	#N/A	#N/A	#N/A	#N/A	#N/A		0	0	0	3	1	0	1	0	0	0	0	3														0.3	0.9
593-60-2	209-800-6	209-800-6	Bromoethylene	209-800-6	#N/A	#N/A	#N/A	#N/A	#REF!	Classified CMR according to Annex VI of Regulation 1272/2008	Press. Gas Flam. Gas 1 Carc. 1B	H220 H350	#N/A	#N/A	#N/A	#N/A	#N/A	#N/A	#N/A		0	0	0	3	1	0	0	0	0	0	0	3														0.3	0.9
602-87-9	210-025-0	210-025-0	1,2-dihydro-5-nitroacenaphthylene	210-025-0	#N/A	#N/A	#N/A	#N/A	#REF!	Classified CMR according to Annex VI of Regulation 1272/2008	Carc. 1B	H350	#N/A	#N/A	#N/A	#N/A	#N/A	#N/A	#N/A		0	0	0	3	1	0	0	0	0	0	0	3														0.3	0.9
605-50-5	210-088-4	210-088-4	Diisopentyl phthalate	210-088-4	#N/A	210-088-4	210-088-4	#N/A	#REF!	Classified CMR according to Annex VI of Regulation 1272/2008	Repr. 1B Aquatic Acute 1	H360FD H400	#N/A	H360FD H400	Toxic for reproduction (Article 57c)	H360FD H400	#N/A	#N/A	#N/A		0	0	0	3	0	0	1	0	0	0	0	3														1	3
613-35-4	210-338-2	210-338-2	N,N-[1,1-biphenyl]-4,4-diylbisacetamide	210-338-2	#N/A	#N/A	#N/A	#N/A	#REF!	Classified CMR according to Annex VI of Regulation 1272/2008	Carc. 1B Muta. 2 Acute Tox. 4 * Acute Tox. 4 * Acute Tox. 4 *	H350 H341 H332 H312 H302	#N/A	#N/A	#N/A	#N/A	#N/A	#N/A	#N/A		0	0	0	3	1	1	0	0	0	0	0	3														0.3	0.9
625-45-6	210-894-6	210-894-6	Methoxyacetic acid	210-894-6	#N/A	210-894-6	#N/A	#N/A	#REF!	Classified CMR according to Annex VI of Regulation 1272/2008	Repr. 1B Acute Tox. 4 * Skin Corr. 1B	H360FD H302 H314	#N/A	H360FD H302 H314	Toxic for reproduction (Article 57c)	#N/A	#N/A	#N/A	#N/A		0	0	0	3	0	0	1	0	0	0	0	3														1	3
629-14-1	211-076-1	211-076-1	1,2-diethoxyethane	211-076-1	#N/A	211-076-1	#N/A	#N/A	#REF!	Classified CMR according to Annex VI of Regulation 1272/2008	Flam. Liq. 2 Repr. 1A Eye Irrit. 2	H225 H360Df H319	#N/A	H225 H360Df H319	Toxic for reproduction (Article 57c)	#N/A	#N/A	#N/A	#N/A		0	0	0	3	0	0	1	0	0	0	0	3														1	3
630-08-0	211-128-3	211-128-3	Carbon monoxide	211-128-3	#N/A	#N/A	#N/A	#N/A	#REF!	Classified CMR according to Annex VI of Regulation 1272/2008	Flam. Gas 1 Press. Gas Repr. 1A Acute Tox. 3 * STOT RE 1	H220 H360D *** H331 H372 **	#N/A	#N/A	#N/A	#N/A	#N/A	#N/A	#N/A		0	0	0	3	0	0	1	0	0	0	0	3														0.3	0.9
680-31-9	211-653-8	211-653-8	Hexamethylphosphoric triamide	211-653-8	#N/A	#N/A	#N/A	#N/A	#REF!	Classified CMR according to Annex VI of Regulation 1272/2008	Carc. 1B Muta. 1B	H350 H340	#N/A	#N/A	#N/A	#N/A	#N/A	#N/A	#N/A		0	0	0	3	1	1	0	0	0	0	0	3														0.3	0.9
683-18-1	211-670-0	211-670-0	Dibutyltin dichloride (DBTC)	#N/A	#N/A	211-670-0	#N/A	#N/A	#REF!	#N/A	#N/A	#N/A	#N/A	H341 H360FD H330 H301 H312 H372 ** H314 H400 H410	Toxic for reproduction (Article 57c)	#N/A	#N/A	#N/A	#N/A		0	0	1	0	0	1	1	0	0	0	0	3														1	3
693-98-1	-	211-765-7	2-methylimidazole	211-765-7	#N/A	211-765-7	#N/A	#N/A	#REF!	Classified CMR according to Annex VI of Regulation 1272/2008	Repr. 1B	H369Df	#N/A	H369Df	Toxic for reproduction (Article 57c)	#N/A	#N/A	#N/A	#N/A		0	0	0	3	0	0	1	0	0	0	0	3														1	3
868-85-9	212-783-8	212-783-8	Dimethyl phosphonate	#N/A	#N/A	#N/A	#N/A	212-783-8	#REF!	#N/A	#N/A	#N/A	#N/A	#N/A	#N/A	#N/A	#N/A	CMR#Consumer use#High (aggregated) tonnage#High RCR#Wide dispersive use	#N/A		0	0	0	3	0	0	0	0	0	0	0	3														0.5	1.5
872-50-4	212-828-1	212-828-1	N-methyl-2-pyrrolidone	212-828-1	#N/A	212-828-1	#N/A	#N/A	#REF!	Classified CMR according to Annex VI of Regulation 1272/2008	Repr. 1B Eye Irrit. 2 STOT SE 3 Skin Irrit. 2	H360D*** H319 H335 H315	#N/A	H360D *** H335 H315 H319	Toxic for reproduction (Article 57c)	#N/A	#N/A	#N/A	#N/A		0	0	0	3	0	0	1	0	0	0	0	3														1	3
1072-63-5	-	214-012-0	1-vinylimidazole	214-012-0	#N/A	214-012-0	#N/A	#N/A	#REF!	Classified CMR according to Annex VI of Regulation 1272/2008	Repr. 1B	H360D	#N/A	#N/A	Toxic for reproduction (Article 57c)	#N/A	#N/A	#N/A	#N/A		0	0	0	3	0	0	1	0	0	0	0	3														1	3
1116-54-7	214-237-4	214-237-4	2,2'-(nitrosoimino)bisethanol	214-237-4	#N/A	#N/A	#N/A	#N/A	#REF!	Classified CMR according to Annex VI of Regulation 1272/2008	Carc. 1B	H350	#N/A	#N/A	#N/A	#N/A	#N/A	#N/A	#N/A		0	0	0	3	1	0	0	0	0	0	0	3														0.3	0.9
1120-71-4	214-317-9	214-317-9	1,3-propanesultone	214-317-9	#N/A	214-317-9	#N/A	#N/A	#REF!	Classified CMR according to Annex VI of Regulation 1272/2008	Carc. 1B Acute Tox. 4 * Acute Tox. 4 *	H350 H312 H302	#N/A	H350 H312 H302	Carcinogenic (Article 57a)	#N/A	#N/A	#N/A	#N/A		0	0	0	3	1	0	0	0	0	0	0	3														1	3
1303-86-2	215-125-8	215-125-8	boric oxide	215-125-8	#N/A	215-125-8	#N/A	#N/A	#REF!	Classified CMR according to Annex VI of Regulation 1272/2008	Repr. 1B	H360FD	#N/A	H360FD	Toxic for reproduction (Article 57c)	#N/A	#N/A	#N/A	#N/A		0	0	0	3	0	0	1	0	0	0	0	3														1	3
12179-04-3	215-540-4	215-540-4	borax pentahydrate, disodium tetraborate pentahydrate	215-540-4	#N/A	215-540-4	#N/A	#N/A	#REF!	Classified CMR according to Annex VI of Regulation 1272/2008	Repr. 1B	H360FD	#N/A	H360FD	Toxic for reproduction (Article 57c)	#N/A	#N/A	#N/A	#N/A		0	0	0	3	0	0	1	0	0	0	0	3														1	3
12179-04-3, 1303-96-4, 1330-43-4	215-540-4	215-540-4	Disodium tetraborate, anhydrous	215-540-4	#N/A	215-540-4	#N/A	#N/A	#REF!	Classified CMR according to Annex VI of Regulation 1272/2008	Repr. 1B	H360FD	#N/A	H360FD	Toxic for reproduction (Article 57c)	#N/A	#N/A	#N/A	#N/A		0	0	0	3	0	0	1	0	0	0	0	3														1	3
1303-96-4	215-540-4	215-540-4	borax decahydrate, disodium tetraborate decahydrate	215-540-4	#N/A	215-540-4	#N/A	#N/A	#REF!	Classified CMR according to Annex VI of Regulation 1272/2008	Repr. 1B	H360FD	#N/A	H360FD	Toxic for reproduction (Article 57c)	#N/A	#N/A	#N/A	#N/A		0	0	0	3	0	0	1	0	0	0	0	3														1	3
1330-43-4	215-540-4	215-540-4	boric acid, disodium salt, disodium tetraborate, anhydrous	215-540-4	#N/A	215-540-4	#N/A	#N/A	#REF!	Classified CMR according to Annex VI of Regulation 1272/2008	Repr. 1B	H360FD	#N/A	H360FD	Toxic for reproduction (Article 57c)	#N/A	#N/A	#N/A	#N/A		0	0	0	3	0	0	1	0	0	0	0	3														1	3
1464-53-5	215-979-1	215-979-1	2,2'-bioxirane	215-979-1	#N/A	#N/A	#N/A	#N/A	#REF!	Classified CMR according to Annex VI of Regulation 1272/2008	Carc. 1B Muta. 1B Acute Tox. 2 * Acute Tox. 3 * Acute Tox. 3 * Skin Corr. 1B	H350 H340 H330 H311 H301 H314	#N/A	#N/A	#N/A	#N/A	#N/A	#N/A	#N/A		0	0	0	3	1	1	0	0	0	0	0	3														0.3	0.9
1937-37-7	217-710-3	217-710-3	Disodium 4-amino-3-[[4'-[(2,4-diaminophenyl)azo][1,1'-biphenyl]-4-yl]azo] -5-hydroxy-6-(phenylazo)naphthalene-2,7-disulphonate	217-710-3	#N/A	217-710-3	#N/A	#N/A	#REF!	Classified CMR according to Annex VI of Regulation 1272/2008	Carc. 1B Repr. 2	H350 H361d ***	#N/A	H350 H361d ***	Carcinogenic (Article 57a)	#N/A	#N/A	#N/A	#N/A		0	0	0	3	1	0	1	0	0	0	0	3														1	3
2475-45-8	219-603-7	219-603-7	1,4,5,8-tetraaminoanthraquinone	219-603-7	#N/A	#N/A	#N/A	#N/A	#REF!	Classified CMR according to Annex VI of Regulation 1272/2008	Carc. 1B Skin Irrit. 2 Eye Dam. 1 Skin Sens. 1	H350 H315 H318 H317	#N/A	#N/A	#N/A	#N/A	#N/A	#N/A	#N/A		0	0	0	3	1	0	0	0	0	0	0	3														0.3	0.9
2602-46-2	220-012-1	220-012-1	Tetrasodium 3,3'-[[1,1'-biphenyl]-4,4'-diylbis(azo)]bis[5-amino-4-hydroxynaphthalene-2,7-disulphonate]	220-012-1	#N/A	#N/A	#N/A	#N/A	#REF!	Classified CMR according to Annex VI of Regulation 1272/2008	Carc. 1B Repr. 2	H350 H361d ***	#N/A	#N/A	#N/A	#N/A	#N/A	#N/A	#N/A		0	0	0	3	1	0	1	0	0	0	0	3														0.3	0.9
2687-91-4	220-250-6	220-250-6	N-Ethyl-2-pyrrolidone	220-250-6	#N/A	#N/A	#N/A	#N/A	#REF!	Classified CMR according to Annex VI of Regulation 1272/2008	Repr. 1B	H360D	#N/A	#N/A	#N/A	#N/A	#N/A	#N/A	#N/A		0	0	0	3	0	0	1	0	0	0	0	3														0.3	0.9
5146-66-7	225-918-0	225-918-0	3,7-dimethylocta-2,6-dienenitrile	225-918-0	#N/A	#N/A	#N/A	#N/A	#REF!	Substance is agreed by RAC to be a classified CMR according to Annex VI of Regulation 1272/2008, however it is not yet formally included.	Muta. 1B	H340	#N/A	#N/A	#N/A	#N/A	#N/A	#N/A	#N/A		0	0	0	3	0	1	0	0	0	0	0	3														0.3	0.9
5216-25-1	226-009-1	226-009-1	a,a,a,4-tetrachlorotoluene	226-009-1	#N/A	#N/A	#N/A	#N/A	#REF!	Classified CMR according to Annex VI of Regulation 1272/2008	Carc. 1B Repr. 2 STOT RE 1 Acute Tox. 4 * Acute Tox. 4 * STOT SE 3 Skin Irrit. 2	H350 H361f *** H372 ** H312 H302 H335 H315	#N/A	#N/A	#N/A	#N/A	#N/A	#N/A	#N/A		0	0	0	3	1	0	1	0	0	0	0	3														0.3	0.9
5625-90-1	227-062-3	227-062-3	N,N'-methylenedimorpholine; N,N'-methylenebismorpholine;[formaldehyde released from N,N'-methylenebismorpholine];[MBM]	227-062-3	#N/A	#N/A	#N/A	#N/A	#REF!	Substance is agreed by RAC to be a classified CMR according to Annex VI of Regulation 1272/2008, however it is not yet formally included.	Carc. 1B Muta. 2Acute Tox. 4Acute Tox. 4Acute Tox. 4STOT RE 2Skin Corr. 1B Skin Sens. 1	H350 H341 H332 H312 H302 H373(gastrointestin al tract, respiratory tract) H314H317	#N/A	#N/A	#N/A	#N/A	#N/A	#N/A	#N/A		0	0	0	3	1	1	0	0	0	0	0	3														0.3	0.9
6804-07-05	229-879-0	229-879-0	Carbadox	229-879-0	#N/A	#N/A	#N/A	#N/A	#REF!	Classified CMR (Class I & II) according to Annex 1 of Directive 67/548/EEC	Flam. Sol. 1 Carc. 1B Acute Tox. 4 *	H228 H350 H302	#N/A	#N/A	#N/A	#N/A	#N/A	#N/A	#N/A		0	0	0	3	1	0	0	0	0	0	0	3														0.3	0.9
7632-04-4	231-556-4	231-556-4	Sodium peroxometaborate	231-556-4	#N/A	231-556-4	231-556-4	#N/A	#REF!	Classified CMR according to Annex VI of Regulation 1272/2008	Oxid. Sol. 3 Repr. 1B Acute Tox. 4 * STOT SE 3 Eye Dam. 1	H272 H360Df H302 H335 H318	#N/A	H272 H360Df H302 H335 H318	Toxic for reproduction (Article 57c)	H272 H360Df H302 H335 H318	#N/A	#N/A	#N/A		0	0	0	3	0	0	1	0	0	0	0	3														1	3
7632-04-4	231-556-4	231-556-4	sodium peroxometaborate	231-556-4	#N/A	231-556-4	231-556-4	#N/A	#REF!	Classified CMR according to Annex VI of Regulation 1272/2008	Oxid. Sol. 3 Repr. 1B Acute Tox. 4 * STOT SE 3 Eye Dam. 1	H272 H360Df H302 H335 H318	#N/A	H272 H360Df H302 H335 H318	Toxic for reproduction (Article 57c)	H272 H360Df H302 H335 H318	#N/A	#N/A	#N/A		0	0	0	3	0	0	1	0	0	0	0	3														1	3
7758-01-02	231-829-8	231-829-8	Potassium bromate	231-829-8	#N/A	#N/A	#N/A	#N/A	#REF!	Classified CMR (Class I & II) according to Annex 1 of Directive 67/548/EEC	Ox. Sol. 1 Carc. 1B Acute Tox. 3 *	H271 H350 H301	#N/A	#N/A	#N/A	#N/A	#N/A	#N/A	#N/A		0	0	0	3	1	0	0	0	0	0	0	3														0.3	0.9
7789-00-6	232-140-5	232-140-5	Potassium chromate	#N/A	#N/A	#N/A	232-140-5	#N/A	#REF!	#N/A	#N/A	#N/A	#N/A	#N/A	Carcinogenic (Article 57a)#Mutagenic (Article 57b)	H350i H340 H335 H315 H319 H317 H400 H410	#N/A	#N/A	#N/A		0	0	1	0	1	1	0	0	0	0	0	3														1	3
8006-61-9	232-349-1	232-349-1	Gasoline, natural	232-349-1	#N/A	#N/A	#N/A	#N/A	#REF!	Classified CMR according to Annex VI of Regulation 1272/2008. (Might not apply when contaminants are below below legal thresholds and/or full refining history is known)	Carc. 1B Muta. 1B Asp. Tox. 1	H350 H340 H304	#N/A	#N/A	#N/A	#N/A	#N/A	#N/A	#N/A		0	0	0	3	1	1	0	0	0	0	0	3														0.3	0.9
8009-03-08	232-373-2	232-373-2	Petrolatum	232-373-2	#N/A	#N/A	#N/A	#N/A	#REF!	Classified CMR according to Annex VI of Regulation 1272/2008	Carc. 1B	H350	#N/A	#N/A	#N/A	#N/A	#N/A	#N/A	#N/A		0	0	0	3	1	0	0	0	0	0	0	3														0.3	0.9
8030-30-6	232-443-2	232-443-2	Naphtha	232-443-2	#N/A	#N/A	#N/A	#N/A	#REF!	Classified CMR according to Annex VI of Regulation 1272/2008. (Might not apply when contaminants are below below legal thresholds and/or full refining history is known)	Carc. 1B Muta. 1B Asp. Tox. 1	H350 H340 H304	#N/A	#N/A	#N/A	#N/A	#N/A	#N/A	#N/A		0	0	0	3	1	1	0	0	0	0	0	3														0.3	0.9
8032-32-4	232-453-7	232-453-7	Ligroine	232-453-7	#N/A	#N/A	#N/A	#N/A	#REF!	Classified CMR according to Annex VI of Regulation 1272/2008. (Might not apply when contaminants are below below legal thresholds and/or full refining history is known)	Carc. 1B Muta. 1B Asp. Tox. 1	H350 H340 H304	#N/A	#N/A	#N/A	#N/A	#N/A	#N/A	#N/A		0	0	0	3	1	1	0	0	0	0	0	3														0.3	0.9
11113-50-1	234-343-4	234-343-4	boric acid, crude natural	234-343-4	#N/A	234-343-4	#N/A	#N/A	#REF!	Classified CMR according to Annex VI of Regulation 1272/2008	Repr. 1B	H360FD	#N/A	H360FD	Toxic for reproduction (Article 57c)	#N/A	#N/A	#N/A	#N/A		0	0	0	3	0	0	1	0	0	0	0	3														1	3
11138-47-9	234-390-0	234-390-0	perboric acid, sodium salt	234-390-0	#N/A	234-390-0	234-390-0	#N/A	#REF!	Classified CMR according to Annex VI of Regulation 1272/2008	Oxid. Sol. 3 Repr. 1B Acute Tox. 4 * STOT SE 3 Eye Dam. 1	H272 H360Df H302 H335 H318	#N/A	H272 H360Df H302 H335 H318	Toxic for reproduction (Article 57c)	H272 H360Df H302 H335 H318	#N/A	#N/A	#N/A		0	0	0	3	0	0	1	0	0	0	0	3														1	3
12008-41-2/12280-03-4	234-541-0	234-541-0	disodium octaborate anhydrous	234-541-0	#N/A	#N/A	#N/A	#N/A	#REF!	Substance is agreed by RAC to be a classified CMR according to Annex VI of Regulation 1272/2008, however it is not yet formally included.	Repr. 1B	H360FD	#N/A	#N/A	#N/A	#N/A	#N/A	#N/A	#N/A		0	0	0	3	0	0	1	0	0	0	0	3														0.3	0.9
12280-03-4/12008-41-2	234-541-0	234-541-0	disodium octaborate tetrahydrate	234-541-0	#N/A	#N/A	#N/A	#N/A	#REF!	Substance is agreed by RAC to be a classified CMR according to Annex VI of Regulation 1272/2008, however it is not yet formally included.	Repr. 1B	H360FD	#N/A	#N/A	#N/A	#N/A	#N/A	#N/A	#N/A		0	0	0	3	0	0	1	0	0	0	0	3														0.3	0.9
12267-73-1	235-541-3	235-541-3	tetraboron disodium heptaoxide, hydrate	235-541-3	#N/A	235-541-3	#N/A	#N/A	#REF!	Classified CMR according to Annex VI of Regulation 1272/2008	Repr. 1B	H360FD	#N/A	H360FD	Toxic for reproduction (Article 57c)	#N/A	#N/A	#N/A	#N/A		0	0	0	3	0	0	1	0	0	0	0	3														1	3
13360-57-1	236-412-4	236-412-4	Dimethylsulphamoyl chloride	236-412-4	#N/A	#N/A	#N/A	#N/A	#REF!	Classified CMR according to Annex VI of Regulation 1272/2008	Carc. 1B Acute Tox. 2 * Acute Tox. 4 * Acute Tox. 4 * Skin Corr. 1B	H350 H330 H312 H302 H314	#N/A	#N/A	#N/A	#N/A	#N/A	#N/A	#N/A		0	0	0	3	1	0	0	0	0	0	0	3														0.3	0.9
13840-56-7	237-560-2	237-560-2	orthoboric acid, sodium salt	237-560-2	#N/A	#N/A	#N/A	#N/A	#REF!	Classified CMR according to Annex VI of Regulation 1272/2008	Repr. 1B	H360FD	#N/A	#N/A	#N/A	#N/A	#N/A	#N/A	#N/A		0	0	0	3	0	0	1	0	0	0	0	3														0.3	0.9
15120-21-5	239-172-9	239-172-9	sodium perborate	239-172-9	#N/A	239-172-9	239-172-9	#N/A	#REF!	Classified CMR according to Annex VI of Regulation 1272/2008	Oxid. Sol. 3 Repr. 1B Acute Tox. 4 * STOT SE 3 Eye Dam. 1	H272 H360Df H302 H335 H318	#N/A	H272 H360Df H302 H335 H318	Toxic for reproduction (Article 57c)	H272 H360Df H302 H335 H318	#N/A	#N/A	#N/A		0	0	0	3	0	0	1	0	0	0	0	3														1	3
16071-86-6	240-221-1	240-221-1	Disodium [5-[[4'-[[2,6-dihydroxy-3-[(2-hydroxy-5-sulphophenyl)azo]phenyl]azo][1,1'-biphenyl]-4-yl]azo]salicylato(4-)]cuprate(2-)	240-221-1	#N/A	#N/A	#N/A	#N/A	#REF!	Classified CMR according to Annex VI of Regulation 1272/2008	Carc. 1B	H350	#N/A	#N/A	#N/A	#N/A	#N/A	#N/A	#N/A		0	0	0	3	1	0	0	0	0	0	0	3														0.3	0.9
25154-52-3	246-672-0	246-672-0	Nonylphenol	246-672-0	246-672-0	#N/A	#N/A	#N/A	#REF!	Nonylphenol is an endocrine disruptor (cat 1) and is classified as possibly toxic for reproduction (R3), It is also persistent and bio-accumulative and it has been found in humans and the environment.	Acute Tox. 4 *; Skin Corr. 1B; Repr. 2; Aquatic Acute 1; Aquatic Chronic 1	H302; H314; H361fd; H400; H410	H361fd H302 H314 H400 H410	#N/A	#N/A	#N/A	#N/A	#N/A	CAT1		0	0	1	0	0	0	1	0	1	0	0	3														1	3
27140-08-5	248-259-0	248-259-0	Phenylhydrazine hydrochloride	248-259-0	#N/A	#N/A	#N/A	#N/A	#REF!	Classified CMR according to Annex VI of Regulation 1272/2008	Carc. 1B Muta. 2 Acute Tox. 3 * Acute Tox. 3 * Acute Tox. 3 * STOT RE 1 Eye Irrit. 2 Skin Irrit. 2 Skin Sens. 1 Aquatic Acute 1	H350 H341 H331 H311 H301 H372 ** H319 H315 H317 H400	#N/A	#N/A	#N/A	#N/A	#N/A	#N/A	#N/A		0	0	0	3	1	1	0	0	0	0	0	3														0.3	0.9
28768-32-3	249-204-3	249-204-3	4,4'-methylenebis[N,N-bis(2,3-epoxypropyl)aniline]	#N/A	#N/A	#N/A	#N/A	249-204-3	#REF!	#N/A	#N/A	#N/A	#N/A	#N/A	#N/A	#N/A	#N/A	CMR#Wide dispersive use	#N/A		0	0	0	3	0	0	0	0	0	0	0	3														0.5	1.5
37894-46-5	253-704-7	253-704-7	6-(2-chloroethyl)-6-(2-methoxyethoxy)-2,5,7,10-tetraoxa-6-silaundecane	253-704-7	#N/A	#N/A	#N/A	#N/A	#REF!	Classified CMR according to Annex VI of Regulation 1272/2008	Repr. 1B Acute Tox. 4 * STOT RE 2 *	H360D *** H302 H373 **	#N/A	#N/A	#N/A	#N/A	#N/A	#N/A	#N/A		0	0	0	3	0	0	1	0	0	0	0	3														0.3	0.9
52033-74-6	257-622-2	257-622-2	Phenylhydrazinium sulphate (2:1)	257-622-2	#N/A	#N/A	#N/A	#N/A	#REF!	Classified CMR according to Annex VI of Regulation 1272/2008	Carc. 1B Muta. 2 Acute Tox. 3 * Acute Tox. 3 * Acute Tox. 3 * STOT RE 1 Eye Irrit. 2 Skin Irrit. 2 Skin Sens. 1 Aquatic Acute 1	H350 H341 H331 H311 H301 H372 ** H319 H315 H317 H400	#N/A	#N/A	#N/A	#N/A	#N/A	#N/A	#N/A		0	0	0	3	1	1	0	0	0	0	0	3														0.3	0.9
57583-34-3	260-828-5	260-828-5	2-ethylhexyl 10-ethyl-4-[[2-[(2-ethylhexyl)oxy]-2-xoethyl]thio]-4-methyl-7-oxo-8-oxa-3,5-dithia-4-stannatetradecanoate	#N/A	#N/A	#N/A	#N/A	260-828-5	#REF!	#N/A	#N/A	#N/A	#N/A	#N/A	#N/A	#N/A	H361d	CMR#High (aggregated) tonnage	#N/A		0	0	0	3	0	0	1	0	0	0	0	3														0.5	1.5
64741-41-9	265-041-0	265-041-0	Naphtha (petroleum), heavy straight-run	265-041-0	#N/A	#N/A	#N/A	#N/A	#REF!	Classified CMR according to Annex VI of Regulation 1272/2008. (Might not apply when contaminants are below below legal thresholds and/or full refining history is known)	Carc. 1B Muta. 1B Asp. Tox. 1	H350 H340 H304	#N/A	#N/A	#N/A	#N/A	#N/A	#N/A	#N/A		0	0	0	3	1	1	0	0	0	0	0	3														0.3	0.9
64741-42-0	265-042-6	265-042-6	Naphtha (petroleum), full-range straight-run	265-042-6	#N/A	#N/A	#N/A	#N/A	#REF!	Classified CMR according to Annex VI of Regulation 1272/2008. (Might not apply when contaminants are below below legal thresholds and/or full refining history is known)	Carc. 1B Muta. 1B Asp. Tox. 1	H350 H340 H304	#N/A	#N/A	#N/A	#N/A	#N/A	#N/A	#N/A		0	0	0	3	1	1	0	0	0	0	0	3														0.3	0.9
64741-45-3	265-045-2	265-045-2	Residues (petroleum), atm. tower	265-045-2	#N/A	#N/A	#N/A	#N/A	#REF!	Classified CMR according to Annex VI of Regulation 1272/2008	Carc. 1B	H350	#N/A	#N/A	#N/A	#N/A	#N/A	#N/A	#N/A		0	0	0	3	1	0	0	0	0	0	0	3														0.3	0.9
64741-46-4	265-046-8	265-046-8	Naphtha (petroleum), light straight-run	265-046-8	#N/A	#N/A	#N/A	#N/A	#REF!	Classified CMR according to Annex VI of Regulation 1272/2008. (Might not apply when contaminants are below below legal thresholds and/or full refining history is known)	Carc. 1B Muta. 1B Asp. Tox. 1	H350 H340 H304	#N/A	#N/A	#N/A	#N/A	#N/A	#N/A	#N/A		0	0	0	3	1	1	0	0	0	0	0	3														0.3	0.9
64741-47-5	265-047-3	265-047-3	Natural gas condensates (petroleum)	265-047-3	#N/A	#N/A	#N/A	#N/A	#REF!	Classified CMR according to Annex VI of Regulation 1272/2008. (Might not apply when contaminants are below below legal thresholds and/or full refining history is known)	Carc. 1B Muta. 1B Asp. Tox. 1	H350 H340 H304	#N/A	#N/A	#N/A	#N/A	#N/A	#N/A	#N/A		0	0	0	3	1	1	0	0	0	0	0	3														0.3	0.9
64741-48-6	265-048-9	265-048-9	Natural gas (petroleum), raw liq. Mix	265-048-9	#N/A	#N/A	#N/A	#N/A	#REF!	Classified CMR according to Annex VI of Regulation 1272/2008. (Might not apply when contaminants are below below legal thresholds and/or full refining history is known)	Carc. 1B Muta. 1B Asp. Tox. 1	H350 H340 H304	#N/A	#N/A	#N/A	#N/A	#N/A	#N/A	#N/A		0	0	0	3	1	1	0	0	0	0	0	3														0.3	0.9
64741-50-0	265-051-5	265-051-5	Distillates (petroleum), light paraffinic	265-051-5	#N/A	#N/A	#N/A	#N/A	#REF!	Classified CMR according to Annex VI of Regulation 1272/2008	Carc. 1A	H350	#N/A	#N/A	#N/A	#N/A	#N/A	#N/A	#N/A		0	0	0	3	1	0	0	0	0	0	0	3														0.3	0.9
64741-51-1	265-052-0	265-052-0	Distillates (petroleum), heavy paraffinic	265-052-0	#N/A	#N/A	#N/A	#N/A	#REF!	Classified CMR according to Annex VI of Regulation 1272/2008	Carc. 1A	H350	#N/A	#N/A	#N/A	#N/A	#N/A	#N/A	#N/A		0	0	0	3	1	0	0	0	0	0	0	3														0.3	0.9
64741-52-2	265-053-6	265-053-6	Distillates (petroleum), light naphthenic	265-053-6	#N/A	#N/A	#N/A	#N/A	#REF!	Classified CMR according to Annex VI of Regulation 1272/2008	Carc. 1A	H350	#N/A	#N/A	#N/A	#N/A	#N/A	#N/A	#N/A		0	0	0	3	1	0	0	0	0	0	0	3														0.3	0.9
64741-53-3	265-054-1	265-054-1	Distillates (petroleum), heavy naphthenic	265-054-1	#N/A	#N/A	#N/A	#N/A	#REF!	Classified CMR according to Annex VI of Regulation 1272/2008	Carc. 1A	H350	#N/A	#N/A	#N/A	#N/A	#N/A	#N/A	#N/A		0	0	0	3	1	0	0	0	0	0	0	3														0.3	0.9
64741-54-4	265-055-7	265-055-7	Naphtha (petroleum), heavy catalytic cracked	265-055-7	#N/A	#N/A	#N/A	#N/A	#REF!	Classified CMR according to Annex VI of Regulation 1272/2008. (Might not apply when contaminants are below below legal thresholds and/or full refining history is known)	Carc. 1B Muta. 1B Asp. Tox. 1	H350 H340 H304	#N/A	#N/A	#N/A	#N/A	#N/A	#N/A	#N/A		0	0	0	3	1	1	0	0	0	0	0	3														0.3	0.9
64741-55-5	265-056-2	265-056-2	Naphtha (petroleum), light catalytic cracked	265-056-2	#N/A	#N/A	#N/A	#N/A	#REF!	Classified CMR according to Annex VI of Regulation 1272/2008. (Might not apply when contaminants are below below legal thresholds and/or full refining history is known)	Carc. 1B Muta. 1B Asp. Tox. 1	H350 H340 H304	#N/A	#N/A	#N/A	#N/A	#N/A	#N/A	#N/A		0	0	0	3	1	1	0	0	0	0	0	3														0.3	0.9
64741-57-7	265-058-3	265-058-3	Gas oils (petroleum), heavy vacuum	265-058-3	#N/A	#N/A	#N/A	#N/A	#REF!	Classified CMR according to Annex VI of Regulation 1272/2008	Carc. 1B	H350	#N/A	#N/A	#N/A	#N/A	#N/A	#N/A	#N/A		0	0	0	3	1	0	0	0	0	0	0	3														0.3	0.9
64741-59-9	265-060-4	265-060-4	Distillates (petroleum), light catalytic cracked	265-060-4	#N/A	#N/A	#N/A	#N/A	#REF!	Classified CMR according to Annex VI of Regulation 1272/2008	Carc. 1B	H350	#N/A	#N/A	#N/A	#N/A	#N/A	#N/A	#N/A		0	0	0	3	1	0	0	0	0	0	0	3														0.3	0.9
64741-60-2	265-062-5	265-062-5	Distillates (petroleum), intermediate catalytic cracked	265-062-5	#N/A	#N/A	#N/A	#N/A	#REF!	Classified CMR according to Annex VI of Regulation 1272/2008	Carc. 1B	H350	#N/A	#N/A	#N/A	#N/A	#N/A	#N/A	#N/A		0	0	0	3	1	0	0	0	0	0	0	3														0.3	0.9
64741-61-3	265-063-0	265-063-0	Distillates (petroleum), heavy catalytic cracked	265-063-0	#N/A	#N/A	#N/A	#N/A	#REF!	Classified CMR according to Annex VI of Regulation 1272/2008	Carc. 1B	H350	#N/A	#N/A	#N/A	#N/A	#N/A	#N/A	#N/A		0	0	0	3	1	0	0	0	0	0	0	3														0.3	0.9
64741-62-4	265-064-6	265-064-6	Clarified oils (petroleum), catalytic cracked	265-064-6	#N/A	#N/A	#N/A	#N/A	#REF!	Classified CMR according to Annex VI of Regulation 1272/2008	Carc. 1B	H350	#N/A	#N/A	#N/A	#N/A	#N/A	#N/A	#N/A		0	0	0	3	1	0	0	0	0	0	0	3														0.3	0.9
64741-63-5	265-065-1	265-065-1	Naphtha (petroleum), light catalytic reformed	265-065-1	#N/A	#N/A	#N/A	#N/A	#REF!	Classified CMR according to Annex VI of Regulation 1272/2008. (Might not apply when contaminants are below below legal thresholds and/or full refining history is known)	Carc. 1B Muta. 1B Asp. Tox. 1	H350 H340 H304	#N/A	#N/A	#N/A	#N/A	#N/A	#N/A	#N/A		0	0	0	3	1	1	0	0	0	0	0	3														0.3	0.9
64741-64-6	265-066-7	265-066-7	Naphtha (petroleum), full-range alkylate	265-066-7	#N/A	#N/A	#N/A	#N/A	#REF!	Classified CMR according to Annex VI of Regulation 1272/2008. (Might not apply when contaminants are below below legal thresholds and/or full refining history is known)	Carc. 1B Muta. 1B Asp. Tox. 1	H350 H340 H304	#N/A	#N/A	#N/A	#N/A	#N/A	#N/A	#N/A		0	0	0	3	1	1	0	0	0	0	0	3														0.3	0.9
64741-66-8	265-068-8	265-068-8	Naphtha (petroleum), light alkylate	265-068-8	#N/A	#N/A	#N/A	#N/A	#REF!	Classified CMR according to Annex VI of Regulation 1272/2008. (Might not apply when contaminants are below below legal thresholds and/or full refining history is known)	Carc. 1B Muta. 1B Asp. Tox. 1	H350 H340 H304	#N/A	#N/A	#N/A	#N/A	#N/A	#N/A	#N/A		0	0	0	3	1	1	0	0	0	0	0	3														0.3	0.9
64741-67-9	265-069-3	265-069-3	Residues (petroleum), catalytic reformer fractionator	265-069-3	#N/A	#N/A	#N/A	#N/A	#REF!	Classified CMR according to Annex VI of Regulation 1272/2008	Carc. 1B	H350	#N/A	#N/A	#N/A	#N/A	#N/A	#N/A	#N/A		0	0	0	3	1	0	0	0	0	0	0	3														0.3	0.9
64741-68-0	265-070-9	265-070-9	Naphtha (petroleum), heavy catalytic reformed	265-070-9	#N/A	#N/A	#N/A	#N/A	#REF!	Classified CMR according to Annex VI of Regulation 1272/2008. (Might not apply when contaminants are below below legal thresholds and/or full refining history is known)	Carc. 1B Muta. 1B Asp. Tox. 1	H350 H340 H304	#N/A	#N/A	#N/A	#N/A	#N/A	#N/A	#N/A		0	0	0	3	1	1	0	0	0	0	0	3														0.3	0.9
64741-69-1	265-071-4	265-071-4	Naphtha (petroleum), light hydrocracked	265-071-4	#N/A	#N/A	#N/A	#N/A	#REF!	Classified CMR according to Annex VI of Regulation 1272/2008. (Might not apply when contaminants are below below legal thresholds and/or full refining history is known)	Carc. 1B Muta. 1B Asp. Tox. 1	H350 H340 H304	#N/A	#N/A	#N/A	#N/A	#N/A	#N/A	#N/A		0	0	0	3	1	1	0	0	0	0	0	3														0.3	0.9
64741-70-4	265-073-5	265-073-5	Naphtha (petroleum), isomerization	265-073-5	#N/A	#N/A	#N/A	#N/A	#REF!	Classified CMR according to Annex VI of Regulation 1272/2008. (Might not apply when contaminants are below below legal thresholds and/or full refining history is known)	Carc. 1B Muta. 1B Asp. Tox. 1	H350 H340 H304	#N/A	#N/A	#N/A	#N/A	#N/A	#N/A	#N/A		0	0	0	3	1	1	0	0	0	0	0	3														0.3	0.9
64741-74-8	265-075-6	265-075-6	Naphtha (petroleum), light thermal cracked	265-075-6	#N/A	#N/A	#N/A	#N/A	#REF!	Classified CMR according to Annex VI of Regulation 1272/2008. (Might not apply when contaminants are below below legal thresholds and/or full refining history is known)	Carc. 1B Muta. 1B Asp. Tox. 1	H350 H340 H304	#N/A	#N/A	#N/A	#N/A	#N/A	#N/A	#N/A		0	0	0	3	1	1	0	0	0	0	0	3														0.3	0.9
64741-75-9	265-076-1	265-076-1	Residues (petroleum), hydrocracked	265-076-1	#N/A	#N/A	#N/A	#N/A	#REF!	Classified CMR according to Annex VI of Regulation 1272/2008	Carc. 1B	H350	#N/A	#N/A	#N/A	#N/A	#N/A	#N/A	#N/A		0	0	0	3	1	0	0	0	0	0	0	3														0.3	0.9
64741-76-0	265-077-7	265-077-7	Distillates (petroleum), heavy hydrocracked	265-077-7	#N/A	#N/A	#N/A	#N/A	#REF!	Classified CMR according to Annex VI of Regulation 1272/2008. (Might not apply when contaminants are below below legal thresholds and/or full refining history is known)	Carc. 1B	H350	#N/A	#N/A	#N/A	#N/A	#N/A	#N/A	#N/A		0	0	0	3	1	0	0	0	0	0	0	3														0.3	0.9
64741-78-2	265-079-8	265-079-8	Naphtha (petroleum), heavy hydrocracked	265-079-8	#N/A	#N/A	#N/A	#N/A	#REF!	Classified CMR according to Annex VI of Regulation 1272/2008. (Might not apply when contaminants are below below legal thresholds and/or full refining history is known)	Carc. 1B Muta. 1B Asp. Tox. 1	H350 H340 H304	#N/A	#N/A	#N/A	#N/A	#N/A	#N/A	#N/A		0	0	0	3	1	1	0	0	0	0	0	3														0.3	0.9
64741-80-6	265-081-9	265-081-9	Residues (petroleum), thermal cracked	265-081-9	#N/A	#N/A	#N/A	#N/A	#REF!	Classified CMR according to Annex VI of Regulation 1272/2008	Carc. 1B	H350	#N/A	#N/A	#N/A	#N/A	#N/A	#N/A	#N/A		0	0	0	3	1	0	0	0	0	0	0	3														0.3	0.9
64741-81-7	265-082-4	265-082-4	Distillates (petroleum), heavy thermal cracked	265-082-4	#N/A	#N/A	#N/A	#N/A	#REF!	Classified CMR according to Annex VI of Regulation 1272/2008	Carc. 1B	H350	#N/A	#N/A	#N/A	#N/A	#N/A	#N/A	#N/A		0	0	0	3	1	0	0	0	0	0	0	3														0.3	0.9
64741-82-8	265-084-5	265-084-5	Distillates (petroleum), light thermal cracked	265-084-5	#N/A	#N/A	#N/A	#N/A	#REF!	Classified CMR according to Annex VI of Regulation 1272/2008	Carc. 1B	H350	#N/A	#N/A	#N/A	#N/A	#N/A	#N/A	#N/A		0	0	0	3	1	0	0	0	0	0	0	3														0.3	0.9
64741-83-9	265-085-0	265-085-0	Naphtha (petroleum), heavy thermal cracked	265-085-0	#N/A	#N/A	#N/A	#N/A	#REF!	Classified CMR according to Annex VI of Regulation 1272/2008. (Might not apply when contaminants are below below legal thresholds and/or full refining history is known)	Carc. 1B Muta. 1B Asp. Tox. 1	H350 H340 H304	#N/A	#N/A	#N/A	#N/A	#N/A	#N/A	#N/A		0	0	0	3	1	1	0	0	0	0	0	3														0.3	0.9
64741-84-0	265-086-6	265-086-6	Naphtha (petroleum), solvent-refined light	265-086-6	#N/A	#N/A	#N/A	#N/A	#REF!	Classified CMR according to Annex VI of Regulation 1272/2008. (Might not apply when contaminants are below below legal thresholds and/or full refining history is known)	Carc. 1B Muta. 1B Asp. Tox. 1	H350 H340 H304	#N/A	#N/A	#N/A	#N/A	#N/A	#N/A	#N/A		0	0	0	3	1	1	0	0	0	0	0	3														0.3	0.9
64741-86-2	265-088-7	265-088-7	Distillates (petroleum), sweetened middle	265-088-7	#N/A	#N/A	#N/A	#N/A	#REF!	Classified CMR according to Annex VI of Regulation 1272/2008. (Might not apply when contaminants are below below legal thresholds and/or full refining history is known)	Carc. 1B	H350	#N/A	#N/A	#N/A	#N/A	#N/A	#N/A	#N/A		0	0	0	3	1	0	0	0	0	0	0	3														0.3	0.9
64741-87-3	265-089-2	265-089-2	Naphtha (petroleum), sweetened	265-089-2	#N/A	#N/A	#N/A	#N/A	#REF!	Classified CMR according to Annex VI of Regulation 1272/2008. (Might not apply when contaminants are below below legal thresholds and/or full refining history is known)	Carc. 1B Muta. 1B Asp. Tox. 1	H350 H340 H304	#N/A	#N/A	#N/A	#N/A	#N/A	#N/A	#N/A		0	0	0	3	1	1	0	0	0	0	0	3														0.3	0.9
64741-88-4	265-090-8	265-090-8	Distillates (petroleum), solvent-refined heavy paraffinic	265-090-8	#N/A	#N/A	#N/A	#N/A	#REF!	Classified CMR according to Annex VI of Regulation 1272/2008. (Might not apply when contaminants are below below legal thresholds and/or full refining history is known)	Carc. 1B	H350	#N/A	#N/A	#N/A	#N/A	#N/A	#N/A	#N/A		0	0	0	3	1	0	0	0	0	0	0	3														0.3	0.9
64741-89-5	265-091-3	265-091-3	Distillates (petroleum), solvent-refined light paraffinic	265-091-3	#N/A	#N/A	#N/A	#N/A	#REF!	Classified CMR according to Annex VI of Regulation 1272/2008. (Might not apply when contaminants are below below legal thresholds and/or full refining history is known)	Carc. 1B	H350	#N/A	#N/A	#N/A	#N/A	#N/A	#N/A	#N/A		0	0	0	3	1	0	0	0	0	0	0	3														0.3	0.9
64741-95-3	265-096-0	265-096-0	Residual oils (petroleum), solvent deasphalted	265-096-0	#N/A	#N/A	#N/A	#N/A	#REF!	Classified CMR according to Annex VI of Regulation 1272/2008. (Might not apply when contaminants are below below legal thresholds and/or full refining history is known)	Carc. 1B	H350	#N/A	#N/A	#N/A	#N/A	#N/A	#N/A	#N/A		0	0	0	3	1	0	0	0	0	0	0	3														0.3	0.9
64741-96-4	265-097-6	265-097-6	Distillates (petroleum), solvent-refined heavy naphthenic	265-097-6	#N/A	#N/A	#N/A	#N/A	#REF!	Classified CMR according to Annex VI of Regulation 1272/2008. (Might not apply when contaminants are below below legal thresholds and/or full refining history is known)	Carc. 1B	H350	#N/A	#N/A	#N/A	#N/A	#N/A	#N/A	#N/A		0	0	0	3	1	0	0	0	0	0	0	3														0.3	0.9
64741-97-5	265-098-1	265-098-1	Distillates (petroleum), solvent-refined light naphthenic	265-098-1	#N/A	#N/A	#N/A	#N/A	#REF!	Classified CMR according to Annex VI of Regulation 1272/2008. (Might not apply when contaminants are below below legal thresholds and/or full refining history is known)	Carc. 1B	H350	#N/A	#N/A	#N/A	#N/A	#N/A	#N/A	#N/A		0	0	0	3	1	0	0	0	0	0	0	3														0.3	0.9
64742-01-4	265-101-6	265-101-6	Residual oils (petroleum), solvent-refined	265-101-6	#N/A	#N/A	#N/A	#N/A	#REF!	Classified CMR according to Annex VI of Regulation 1272/2008. (Might not apply when contaminants are below below legal thresholds and/or full refining history is known)	Carc. 1B	H350	#N/A	#N/A	#N/A	#N/A	#N/A	#N/A	#N/A		0	0	0	3	1	0	0	0	0	0	0	3														0.3	0.9
64742-04-7	265-103-7	265-103-7	Extracts (petroleum), heavy paraffinic distillate solvent	265-103-7	#N/A	#N/A	#N/A	#N/A	#REF!	Classified CMR according to Annex VI of Regulation 1272/2008	Carc. 1B	H350	#N/A	#N/A	#N/A	#N/A	#N/A	#N/A	#N/A		0	0	0	3	1	0	0	0	0	0	0	3														0.3	0.9
64742-05-8	265-104-2	265-104-2	Extracts (petroleum), light paraffinic distillate solvent	265-104-2	#N/A	#N/A	#N/A	#N/A	#REF!	Classified CMR according to Annex VI of Regulation 1272/2008	Carc. 1B	H350	#N/A	#N/A	#N/A	#N/A	#N/A	#N/A	#N/A		0	0	0	3	1	0	0	0	0	0	0	3														0.3	0.9
64742-11-6	265-111-0	265-111-0	Extracts (petroleum), heavy naphthenic distillate solvent	265-111-0	#N/A	#N/A	#N/A	#N/A	#REF!	Classified CMR according to Annex VI of Regulation 1272/2008	Carc. 1B	H350	#N/A	#N/A	#N/A	#N/A	#N/A	#N/A	#N/A		0	0	0	3	1	0	0	0	0	0	0	3														0.3	0.9
64742-44-5	265-146-1	265-146-1	Distillates (petroleum), clay-treated heavy naphthenic	265-146-1	#N/A	#N/A	#N/A	#N/A	#REF!	Classified CMR according to Annex VI of Regulation 1272/2008. (Might not apply when contaminants are below below legal thresholds and/or full refining history is known)	Carc. 1B	H350	#N/A	#N/A	#N/A	#N/A	#N/A	#N/A	#N/A		0	0	0	3	1	0	0	0	0	0	0	3														0.3	0.9
64742-46-7	265-148-2	265-148-2	Distillates (petroleum), hydrotreated middle	265-148-2	#N/A	#N/A	#N/A	#N/A	#REF!	Classified CMR according to Annex VI of Regulation 1272/2008. (Might not apply when contaminants are below below legal thresholds and/or full refining history is known)	Carc. 1B	H350	#N/A	#N/A	#N/A	#N/A	#N/A	#N/A	#N/A		0	0	0	3	1	0	0	0	0	0	0	3														0.3	0.9
64742-48-9	265-150-3	265-150-3	Naphtha (petroleum), hydrotreated heavy	265-150-3	#N/A	#N/A	#N/A	#N/A	#REF!	Classified CMR according to Annex VI of Regulation 1272/2008. (Might not apply when contaminants are below below legal thresholds and/or full refining history is known)	Carc. 1B Muta. 1B Asp. Tox. 1	H350 H340 H304	#N/A	#N/A	#N/A	#N/A	#N/A	#N/A	#N/A		0	0	0	3	1	1	0	0	0	0	0	3														0.3	0.9
64742-49-0	265-151-9	265-151-9	Naphtha (petroleum), hydrotreated light	265-151-9	#N/A	#N/A	#N/A	#N/A	#REF!	Classified CMR according to Annex VI of Regulation 1272/2008. (Might not apply when contaminants are below below legal thresholds and/or full refining history is known)	Carc. 1B Muta. 1B Asp. Tox. 1	H350 H340 H304	#N/A	#N/A	#N/A	#N/A	#N/A	#N/A	#N/A		0	0	0	3	1	1	0	0	0	0	0	3														0.3	0.9
64742-52-5	265-155-0	265-155-0	Distillates (petroleum), hydrotreated heavy naphthenic	265-155-0	#N/A	#N/A	#N/A	#N/A	#REF!	Classified CMR according to Annex VI of Regulation 1272/2008. (Might not apply when contaminants are below below legal thresholds and/or full refining history is known)	Carc. 1B	H350	#N/A	#N/A	#N/A	#N/A	#N/A	#N/A	#N/A		0	0	0	3	1	0	0	0	0	0	0	3														0.3	0.9
64742-53-6	265-156-6	265-156-6	Distillates (petroleum), hydrotreated light naphthenic	265-156-6	#N/A	#N/A	#N/A	#N/A	#REF!	Classified CMR according to Annex VI of Regulation 1272/2008. (Might not apply when contaminants are below below legal thresholds and/or full refining history is known)	Carc. 1B	H350	#N/A	#N/A	#N/A	#N/A	#N/A	#N/A	#N/A		0	0	0	3	1	0	0	0	0	0	0	3														0.3	0.9
64742-54-7	265-157-1	265-157-1	Distillates (petroleum), hydrotreated heavy paraffinic	265-157-1	#N/A	#N/A	#N/A	#N/A	#REF!	Classified CMR according to Annex VI of Regulation 1272/2008. (Might not apply when contaminants are below below legal thresholds and/or full refining history is known)	Carc. 1B	H350	#N/A	#N/A	#N/A	#N/A	#N/A	#N/A	#N/A		0	0	0	3	1	0	0	0	0	0	0	3														0.3	0.9
64742-55-8	265-158-7	265-158-7	Distillates (petroleum), hydrotreated light paraffinic	265-158-7	#N/A	#N/A	#N/A	#N/A	#REF!	Classified CMR according to Annex VI of Regulation 1272/2008. (Might not apply when contaminants are below below legal thresholds and/or full refining history is known)	Carc. 1B	H350	#N/A	#N/A	#N/A	#N/A	#N/A	#N/A	#N/A		0	0	0	3	1	0	0	0	0	0	0	3														0.3	0.9
64742-56-9	265-159-2	265-159-2	Distillates (petroleum), solvent-dewaxed light paraffinic	265-159-2	#N/A	#N/A	#N/A	#N/A	#REF!	Classified CMR according to Annex VI of Regulation 1272/2008. (Might not apply when contaminants are below below legal thresholds and/or full refining history is known)	Carc. 1B	H350	#N/A	#N/A	#N/A	#N/A	#N/A	#N/A	#N/A		0	0	0	3	1	0	0	0	0	0	0	3														0.3	0.9
64742-57-0	265-160-8	265-160-8	Residual oils (petroleum), hydrotreated	265-160-8	#N/A	#N/A	#N/A	#N/A	#REF!	Classified CMR according to Annex VI of Regulation 1272/2008. (Might not apply when contaminants are below below legal thresholds and/or full refining history is known)	Carc. 1B	H350	#N/A	#N/A	#N/A	#N/A	#N/A	#N/A	#N/A		0	0	0	3	1	0	0	0	0	0	0	3														0.3	0.9
64742-59-2	265-162-9	265-162-9	Gas oils (petroleum), hydrotreated vacuum	265-162-9	#N/A	#N/A	#N/A	#N/A	#REF!	Classified CMR according to Annex VI of Regulation 1272/2008	Carc. 1B	H350	#N/A	#N/A	#N/A	#N/A	#N/A	#N/A	#N/A		0	0	0	3	1	0	0	0	0	0	0	3														0.3	0.9
64742-61-6	265-165-5	265-165-5	Slack wax (petroleum)	265-165-5	#N/A	#N/A	#N/A	#N/A	#REF!	Classified CMR according to Annex VI of Regulation 1272/2008. (Might not apply when contaminants are below below legal thresholds and/or full refining history is known)	Carc. 1B	H350	#N/A	#N/A	#N/A	#N/A	#N/A	#N/A	#N/A		0	0	0	3	1	0	0	0	0	0	0	3														0.3	0.9
64742-62-7	265-166-0	265-166-0	Residual oils (petroleum), solvent-dewaxed	265-166-0	#N/A	#N/A	#N/A	#N/A	#REF!	Classified CMR according to Annex VI of Regulation 1272/2008. (Might not apply when contaminants are below below legal thresholds and/or full refining history is known)	Carc. 1B	H350	#N/A	#N/A	#N/A	#N/A	#N/A	#N/A	#N/A		0	0	0	3	1	0	0	0	0	0	0	3														0.3	0.9
64742-65-0	265-169-7	265-169-7	Distillates (petroleum), solvent-dewaxed heavy paraffinic	265-169-7	#N/A	#N/A	#N/A	#N/A	#REF!	Classified CMR according to Annex VI of Regulation 1272/2008. (Might not apply when contaminants are below below legal thresholds and/or full refining history is known)	Carc. 1B	H350	#N/A	#N/A	#N/A	#N/A	#N/A	#N/A	#N/A		0	0	0	3	1	0	0	0	0	0	0	3														0.3	0.9
64742-66-1	265-170-2	265-170-2	Naphtha (petroleum), catalytic dewaxed	265-170-2	#N/A	#N/A	#N/A	#N/A	#REF!	Classified CMR according to Annex VI of Regulation 1272/2008. (Might not apply when contaminants are below below legal thresholds and/or full refining history is known)	Carc. 1B Muta. 1B Asp. Tox. 1	H350 H340 H304	#N/A	#N/A	#N/A	#N/A	#N/A	#N/A	#N/A		0	0	0	3	1	1	0	0	0	0	0	3														0.3	0.9
64742-67-2	265-171-8	265-171-8	Foots oil (petroleum)	265-171-8	#N/A	#N/A	#N/A	#N/A	#REF!	Classified CMR according to Annex VI of Regulation 1272/2008. (Might not apply when contaminants are below below legal thresholds and/or full refining history is known)	Carc. 1B	H350	#N/A	#N/A	#N/A	#N/A	#N/A	#N/A	#N/A		0	0	0	3	1	0	0	0	0	0	0	3														0.3	0.9
64742-70-7	265-174-4	265-174-4	Paraffin oils (petroleum), catalytic dewaxed heavy	265-174-4	#N/A	#N/A	#N/A	#N/A	#REF!	Classified CMR according to Annex VI of Regulation 1272/2008. (Might not apply when contaminants are below below legal thresholds and/or full refining history is known)	Carc. 1B	H350	#N/A	#N/A	#N/A	#N/A	#N/A	#N/A	#N/A		0	0	0	3	1	0	0	0	0	0	0	3														0.3	0.9
64742-71-8	265-176-5	265-176-5	Paraffin oils (petroleum), catalytic dewaxed light	265-176-5	#N/A	#N/A	#N/A	#N/A	#REF!	Classified CMR according to Annex VI of Regulation 1272/2008. (Might not apply when contaminants are below below legal thresholds and/or full refining history is known)	Carc. 1B	H350	#N/A	#N/A	#N/A	#N/A	#N/A	#N/A	#N/A		0	0	0	3	1	0	0	0	0	0	0	3														0.3	0.9
64742-73-0	265-178-6	265-178-6	Naphtha (petroleum), hydrodesulfurized light	265-178-6	#N/A	#N/A	#N/A	#N/A	#REF!	Classified CMR according to Annex VI of Regulation 1272/2008. (Might not apply when contaminants are below below legal thresholds and/or full refining history is known)	Carc. 1B Muta. 1B Asp. Tox. 1	H350 H340 H304	#N/A	#N/A	#N/A	#N/A	#N/A	#N/A	#N/A		0	0	0	3	1	1	0	0	0	0	0	3														0.3	0.9
64742-78-5	265-181-2	265-181-2	Residues (petroleum), hydrodesulfurized atmospheric tower	265-181-2	#N/A	#N/A	#N/A	#N/A	#REF!	Classified CMR according to Annex VI of Regulation 1272/2008	Carc. 1B	H350	#N/A	#N/A	#N/A	#N/A	#N/A	#N/A	#N/A		0	0	0	3	1	0	0	0	0	0	0	3														0.3	0.9
64742-79-6	265-182-8	265-182-8	Gas oils (petroleum), hydrodesulfurized	265-182-8	#N/A	#N/A	#N/A	#N/A	#REF!	Classified CMR according to Annex VI of Regulation 1272/2008. (Might not apply when contaminants are below below legal thresholds and/or full refining history is known)	Carc. 1B	H350	#N/A	#N/A	#N/A	#N/A	#N/A	#N/A	#N/A		0	0	0	3	1	0	0	0	0	0	0	3														0.3	0.9
64742-80-9	265-183-3	265-183-3	Distillates (petroleum), hydrodesulfurized middle	265-183-3	#N/A	#N/A	#N/A	#N/A	#REF!	Classified CMR according to Annex VI of Regulation 1272/2008. (Might not apply when contaminants are below below legal thresholds and/or full refining history is known)	Carc. 1B	H350	#N/A	#N/A	#N/A	#N/A	#N/A	#N/A	#N/A		0	0	0	3	1	0	0	0	0	0	0	3														0.3	0.9
64742-82-1/8052-41-3	265-185-4	265-185-4	Stoddard Solvent; Naphtha (petroleum), hydrodesulfurized heavy	265-185-4	#N/A	#N/A	#N/A	#N/A	#REF!	Classified CMR according to Annex VI of Regulation 1272/2008	Carc. 1B Muta. 1B STOT RE 1 Asp. Tox. 1	H350 H340 H372 (central nervous system) H304	#N/A	#N/A	#N/A	#N/A	#N/A	#N/A	#N/A		0	0	0	3	1	1	0	0	0	0	0	3														0.3	0.9
64742-83-2	265-187-5	265-187-5	Naphtha (petroleum), light steam-cracked	265-187-5	#N/A	#N/A	#N/A	#N/A	#REF!	Classified CMR according to Annex VI of Regulation 1272/2008. (Might not apply when contaminants are below below legal thresholds and/or full refining history is known)	Carc. 1B Muta. 1B Asp. Tox. 1	H350 H340 H304	#N/A	#N/A	#N/A	#N/A	#N/A	#N/A	#N/A		0	0	0	3	1	1	0	0	0	0	0	3														0.3	0.9
64742-86-5	265-189-6	265-189-6	Gas oils (petroleum), hydrodesulfurized heavy vacuum	265-189-6	#N/A	#N/A	#N/A	#N/A	#REF!	Classified CMR according to Annex VI of Regulation 1272/2008	Carc. 1B	H350	#N/A	#N/A	#N/A	#N/A	#N/A	#N/A	#N/A		0	0	0	3	1	0	0	0	0	0	0	3														0.3	0.9
64742-89-8	265-192-2	265-192-2	Solvent naphtha (petroleum), light aliph.	265-192-2	#N/A	#N/A	#N/A	#N/A	#REF!	Classified CMR according to Annex VI of Regulation 1272/2008. (Might not apply when contaminants are below below legal thresholds and/or full refining history is known)	Carc. 1B Muta. 1B Asp. Tox. 1	H350 H340 H304	#N/A	#N/A	#N/A	#N/A	#N/A	#N/A	#N/A		0	0	0	3	1	1	0	0	0	0	0	3														0.3	0.9
64742-90-1	265-193-8	265-193-8	Residues (petroleum), steam-cracked	265-193-8	#N/A	#N/A	#N/A	#N/A	#REF!	Classified CMR according to Annex VI of Regulation 1272/2008	Carc. 1B	H350	#N/A	#N/A	#N/A	#N/A	#N/A	#N/A	#N/A		0	0	0	3	1	0	0	0	0	0	0	3														0.3	0.9
64742-95-6	265-199-0	265-199-0	Solvent naphtha (petroleum), light arom.	265-199-0	#N/A	#N/A	#N/A	#N/A	#REF!	Classified CMR according to Annex VI of Regulation 1272/2008. (Might not apply when contaminants are below below legal thresholds and/or full refining history is known)	Carc. 1B Muta. 1B Asp. Tox. 1	H350 H340 H304	#N/A	#N/A	#N/A	#N/A	#N/A	#N/A	#N/A		0	0	0	3	1	1	0	0	0	0	0	3														0.3	0.9
64743-01-7	265-206-7	265-206-7	Petrolatum (petroleum), oxidized	265-206-7	#N/A	#N/A	#N/A	#N/A	#REF!	Classified CMR according to Annex VI of Regulation 1272/2008. (Might not apply when contaminants are below below legal thresholds and/or full refining history is known)	Carc. 1B	H350	#N/A	#N/A	#N/A	#N/A	#N/A	#N/A	#N/A		0	0	0	3	1	0	0	0	0	0	0	3														0.3	0.9
65996-79-4	266-013-0	266-013-0	Solvent naphtha (coal)	266-013-0	#N/A	#N/A	#N/A	#N/A	#REF!	Classified CMR according to Annex VI of Regulation 1272/2008. (Might not apply when contaminants are below below legal thresholds and/or full refining history is known)	Carc. 1B Muta. 1B	H350 H340	#N/A	#N/A	#N/A	#N/A	#N/A	#N/A	#N/A		0	0	0	3	1	1	0	0	0	0	0	3														0.3	0.9
68131-75-9	268-629-5	268-629-5	Gases (petroleum), C3-4	268-629-5	#N/A	#N/A	#N/A	#N/A	#REF!	Classified CMR according to Annex VI of Regulation 1272/2008. (Might not apply when contaminants are below below legal thresholds and/or full refining history is known)	Press. Gas Flam. Gas 1 Carc. 1B Muta. 1B	H220 H350 H340	#N/A	#N/A	#N/A	#N/A	#N/A	#N/A	#N/A		0	0	0	3	1	1	0	0	0	0	0	3														0.3	0.9
68333-22-2	269-777-3	269-777-3	Residues (petroleum), atmospheric	269-777-3	#N/A	#N/A	#N/A	#N/A	#REF!	Classified CMR according to Annex VI of Regulation 1272/2008	Carc. 1B	H350	#N/A	#N/A	#N/A	#N/A	#N/A	#N/A	#N/A		0	0	0	3	1	0	0	0	0	0	0	3														0.3	0.9
68333-25-5	269-781-5	269-781-5	Distillates (petroleum), hydrodesulfurized light catalytic cracked	269-781-5	#N/A	#N/A	#N/A	#N/A	#REF!	Classified CMR according to Annex VI of Regulation 1272/2008	Carc. 1B	H350	#N/A	#N/A	#N/A	#N/A	#N/A	#N/A	#N/A		0	0	0	3	1	0	0	0	0	0	0	3														0.3	0.9
68391-11-7	269-929-9	269-929-9	Pyridine, alkyl derivs.	269-929-9	#N/A	#N/A	#N/A	#N/A	#REF!	Classified CMR according to Annex VI of Regulation 1272/2008. (Might not apply when contaminants are below below legal thresholds and/or full refining history is known)	Muta. 1B Carc. 1B	H340 H350	#N/A	#N/A	#N/A	#N/A	#N/A	#N/A	#N/A		0	0	0	3	1	1	0	0	0	0	0	3														0.3	0.9
68409-99-4	270-071-2	270-071-2	Gases (petroleum), catalytic cracked overheads	270-071-2	#N/A	#N/A	#N/A	#N/A	#REF!	Classified CMR according to Annex VI of Regulation 1272/2008. (Might not apply when contaminants are below below legal thresholds and/or full refining history is known)	Press. Gas Flam. Gas 1 Carc. 1B Muta. 1B	H220 H350 H340	#N/A	#N/A	#N/A	#N/A	#N/A	#N/A	#N/A		0	0	0	3	1	1	0	0	0	0	0	3														0.3	0.9
68410-05-9	270-077-5	270-077-5	Distillates (petroleum), straight-run light	270-077-5	#N/A	#N/A	#N/A	#N/A	#REF!	Classified CMR according to Annex VI of Regulation 1272/2008. (Might not apply when contaminants are below below legal thresholds and/or full refining history is known)	Carc. 1B Muta. 1B Asp. Tox. 1	H350 H340 H304	#N/A	#N/A	#N/A	#N/A	#N/A	#N/A	#N/A		0	0	0	3	1	1	0	0	0	0	0	3														0.3	0.9
68410-71-9	270-088-5	270-088-5	Raffinates (petroleum), catalytic reformer ethylene glycol-water countercurrent exts.	270-088-5	#N/A	#N/A	#N/A	#N/A	#REF!	Classified CMR according to Annex VI of Regulation 1272/2008. (Might not apply when contaminants are below below legal thresholds and/or full refining history is known)	Carc. 1B Muta. 1B Asp. Tox. 1	H350 H340 H304	#N/A	#N/A	#N/A	#N/A	#N/A	#N/A	#N/A		0	0	0	3	1	1	0	0	0	0	0	3														0.3	0.9
68410-96-8	270-092-7	270-092-7	Distillates (petroleum), hydrotreated middle, intermediate boiling	270-092-7	#N/A	#N/A	#N/A	#N/A	#REF!	Classified CMR according to Annex VI of Regulation 1272/2008. (Might not apply when contaminants are below below legal thresholds and/or full refining history is known)	Carc. 1B Muta. 1B Asp. Tox. 1	H350 H340 H304	#N/A	#N/A	#N/A	#N/A	#N/A	#N/A	#N/A		0	0	0	3	1	1	0	0	0	0	0	3														0.3	0.9
68410-97-9	270-093-2	270-093-2	Distillates (petroleum), light distillate hydrotreating process, low-boiling	270-093-2	#N/A	#N/A	#N/A	#N/A	#REF!	Classified CMR according to Annex VI of Regulation 1272/2008. (Might not apply when contaminants are below below legal thresholds and/or full refining history is known)	Carc. 1B Muta. 1B Asp. Tox. 1	H350 H340 H304	#N/A	#N/A	#N/A	#N/A	#N/A	#N/A	#N/A		0	0	0	3	1	1	0	0	0	0	0	3														0.3	0.9
68475-60-5	270-654-1	270-654-1	Alkanes, C4-5	270-654-1	#N/A	#N/A	#N/A	#N/A	#REF!	Classified CMR according to Annex VI of Regulation 1272/2008. (Might not apply when contaminants are below below legal thresholds and/or full refining history is known)	Press. Gas Flam. Gas 1 Carc. 1B Muta. 1B	H220 H350 H340	#N/A	#N/A	#N/A	#N/A	#N/A	#N/A	#N/A		0	0	0	3	1	1	0	0	0	0	0	3														0.3	0.9
68475-70-7	270-658-3	270-658-3	Aromatic hydrocarbons, C6-8, naphtha-raffinate pyrolyzate-derived	270-658-3	#N/A	#N/A	#N/A	#N/A	#REF!	Classified CMR according to Annex VI of Regulation 1272/2008. (Might not apply when contaminants are below below legal thresholds and/or full refining history is known)	Carc. 1B Muta. 1B Asp. Tox. 1	H350 H340 H304	#N/A	#N/A	#N/A	#N/A	#N/A	#N/A	#N/A		0	0	0	3	1	1	0	0	0	0	0	3														0.3	0.9
68475-79-6	270-660-4	270-660-4	Distillates (petroleum), catalytic reformed depentanizer	270-660-4	#N/A	#N/A	#N/A	#N/A	#REF!	Classified CMR according to Annex VI of Regulation 1272/2008. (Might not apply when contaminants are below below legal thresholds and/or full refining history is known)	Carc. 1B Muta. 1B Asp. Tox. 1	H350 H340 H304	#N/A	#N/A	#N/A	#N/A	#N/A	#N/A	#N/A		0	0	0	3	1	1	0	0	0	0	0	3														0.3	0.9
68475-80-9	270-662-5	270-662-5	Distillates (petroleum), light steam-cracked naphtha	270-662-5	#N/A	#N/A	#N/A	#N/A	#REF!	Classified CMR according to Annex VI of Regulation 1272/2008	Carc. 1B	H350	#N/A	#N/A	#N/A	#N/A	#N/A	#N/A	#N/A		0	0	0	3	1	0	0	0	0	0	0	3														0.3	0.9
68476-26-6	270-667-2	270-667-2	Fuel gases	270-667-2	#N/A	#N/A	#N/A	#N/A	#REF!	Classified CMR according to Annex VI of Regulation 1272/2008. (Might not apply when contaminants are below below legal thresholds and/or full refining history is known)	Press. Gas Flam. Gas 1 Carc. 1B Muta. 1B	H220 H350 H340	#N/A	#N/A	#N/A	#N/A	#N/A	#N/A	#N/A		0	0	0	3	1	1	0	0	0	0	0	3														0.3	0.9
68476-29-9	270-670-9	270-670-9	Fuel gases, crude oil distillates	270-670-9	#N/A	#N/A	#N/A	#N/A	#REF!	Classified CMR according to Annex VI of Regulation 1272/2008. (Might not apply when contaminants are below below legal thresholds and/or full refining history is known)	Press. Gas Flam. Gas 1 Carc. 1B Muta. 1B	H220 H350 H340	#N/A	#N/A	#N/A	#N/A	#N/A	#N/A	#N/A		0	0	0	3	1	1	0	0	0	0	0	3														0.3	0.9
68476-32-4	270-674-0	270-674-0	Fuel oil, residues-straight-run gas oils, high-sulfur	270-674-0	#N/A	#N/A	#N/A	#N/A	#REF!	Classified CMR according to Annex VI of Regulation 1272/2008	Carc. 1B	H350	#N/A	#N/A	#N/A	#N/A	#N/A	#N/A	#N/A		0	0	0	3	1	0	0	0	0	0	0	3														0.3	0.9
68476-33-5	270-675-6	270-675-6	Fuel oil, residual	270-675-6	#N/A	#N/A	#N/A	#N/A	#REF!	Classified CMR according to Annex VI of Regulation 1272/2008	Carc. 1B	H350	#N/A	#N/A	#N/A	#N/A	#N/A	#N/A	#N/A		0	0	0	3	1	0	0	0	0	0	0	3														0.3	0.9
68476-40-4	270-681-9	270-681-9	Hydrocarbons, C3-4	270-681-9	#N/A	#N/A	#N/A	#N/A	#REF!	Classified CMR according to Annex VI of Regulation 1272/2008. (Might not apply when contaminants are below below legal thresholds and/or full refining history is known)	Press. Gas Flam. Gas 1 Carc. 1B Muta. 1B	H220 H350 H340	#N/A	#N/A	#N/A	#N/A	#N/A	#N/A	#N/A		0	0	0	3	1	1	0	0	0	0	0	3														0.3	0.9
68476-46-0	270-686-6	270-686-6	Hydrocarbons, C3-11, catalytic cracker distillates	270-686-6	#N/A	#N/A	#N/A	#N/A	#REF!	Classified CMR according to Annex VI of Regulation 1272/2008. (Might not apply when contaminants are below below legal thresholds and/or full refining history is known)	Carc. 1B Muta. 1B Asp. Tox. 1	H350 H340 H304	#N/A	#N/A	#N/A	#N/A	#N/A	#N/A	#N/A		0	0	0	3	1	1	0	0	0	0	0	3														0.3	0.9
68476-49-3	270-689-2	270-689-2	Hydrocarbons, C2-4, C3-rich	270-689-2	#N/A	#N/A	#N/A	#N/A	#REF!	Classified CMR according to Annex VI of Regulation 1272/2008. (Might not apply when contaminants are below below legal thresholds and/or full refining history is known)	Press. Gas Flam. Gas 1 Carc. 1B Muta. 1B	H220 H350 H340	#N/A	#N/A	#N/A	#N/A	#N/A	#N/A	#N/A		0	0	0	3	1	1	0	0	0	0	0	3														0.3	0.9
68476-50-6	270-690-8	270-690-8	Hydrocarbons, C"e5, C5-6-rich	270-690-8	#N/A	#N/A	#N/A	#N/A	#REF!	Classified CMR according to Annex VI of Regulation 1272/2008. (Might not apply when contaminants are below below legal thresholds and/or full refining history is known)	Carc. 1B Muta. 1B Asp. Tox. 1	H350 H340 H304	#N/A	#N/A	#N/A	#N/A	#N/A	#N/A	#N/A		0	0	0	3	1	1	0	0	0	0	0	3														0.3	0.9
68476-55-1	270-695-5	270-695-5	Hydrocarbons, C5-rich	270-695-5	#N/A	#N/A	#N/A	#N/A	#REF!	Classified CMR according to Annex VI of Regulation 1272/2008. (Might not apply when contaminants are below below legal thresholds and/or full refining history is known)	Carc. 1B Muta. 1B Asp. Tox. 1	H350 H340 H304	#N/A	#N/A	#N/A	#N/A	#N/A	#N/A	#N/A		0	0	0	3	1	1	0	0	0	0	0	3														0.3	0.9
68476-85-7	270-704-2	270-704-2	Petroleum gases, liquefied	270-704-2	#N/A	#N/A	#N/A	#N/A	#REF!	Classified CMR according to Annex VI of Regulation 1272/2008. (Might not apply when contaminants are below below legal thresholds and/or full refining history is known)	Press. Gas Flam. Gas 1 Carc. 1B Muta. 1B	H220 H350 H340	#N/A	#N/A	#N/A	#N/A	#N/A	#N/A	#N/A		0	0	0	3	1	1	0	0	0	0	0	3														0.3	0.9
68476-86-8	270-705-8	270-705-8	Petroleum gases, liquefied, sweetened	270-705-8	#N/A	#N/A	#N/A	#N/A	#REF!	Classified CMR according to Annex VI of Regulation 1272/2008. (Might not apply when contaminants are below below legal thresholds and/or full refining history is known)	Press. Gas Flam. Gas 1 Carc. 1B Muta. 1B	H220 H350 H340	#N/A	#N/A	#N/A	#N/A	#N/A	#N/A	#N/A		0	0	0	3	1	1	0	0	0	0	0	3														0.3	0.9
68477-33-8	270-724-1	270-724-1	Gases (petroleum), C3-4, isobutane-rich	270-724-1	#N/A	#N/A	#N/A	#N/A	#REF!	Classified CMR according to Annex VI of Regulation 1272/2008. (Might not apply when contaminants are below below legal thresholds and/or full refining history is known)	Press. Gas Flam. Gas 1 Carc. 1B Muta. 1B	H220 H350 H340	#N/A	#N/A	#N/A	#N/A	#N/A	#N/A	#N/A		0	0	0	3	1	1	0	0	0	0	0	3														0.3	0.9
68477-35-0	270-726-2	270-726-2	Distillates (petroleum), C3-6, piperylene-rich	270-726-2	#N/A	#N/A	#N/A	#N/A	#REF!	Classified CMR according to Annex VI of Regulation 1272/2008. (Might not apply when contaminants are below below legal thresholds and/or full refining history is known)	Press. Gas Flam. Gas 1 Carc. 1B Muta. 1B	H220 H350 H340	#N/A	#N/A	#N/A	#N/A	#N/A	#N/A	#N/A		0	0	0	3	1	1	0	0	0	0	0	3														0.3	0.9
68477-38-3	270-727-8	270-727-8	Distillates (petroleum), cracked steam-cracked petroleum distillates	270-727-8	#N/A	#N/A	#N/A	#N/A	#REF!	Classified CMR according to Annex VI of Regulation 1272/2008	Carc. 1B	H350	#N/A	#N/A	#N/A	#N/A	#N/A	#N/A	#N/A		0	0	0	3	1	0	0	0	0	0	0	3														0.3	0.9
68477-50-9	270-735-1	270-735-1	Distillates (petroleum), polymd. steam-cracked petroleum distillates, C5-12 fraction	270-735-1	#N/A	#N/A	#N/A	#N/A	#REF!	Classified CMR according to Annex VI of Regulation 1272/2008. (Might not apply when contaminants are below below legal thresholds and/or full refining history is known)	Carc. 1B Muta. 1B Asp. Tox. 1	H350 H340 H304	#N/A	#N/A	#N/A	#N/A	#N/A	#N/A	#N/A		0	0	0	3	1	1	0	0	0	0	0	3														0.3	0.9
68477-53-2	270-736-7	270-736-7	Distillates (petroleum), steam-cracked, C5-12 fraction	270-736-7	#N/A	#N/A	#N/A	#N/A	#REF!	Classified CMR according to Annex VI of Regulation 1272/2008. (Might not apply when contaminants are below below legal thresholds and/or full refining history is known)	Carc. 1B Muta. 1B Asp. Tox. 1	H350 H340 H304	#N/A	#N/A	#N/A	#N/A	#N/A	#N/A	#N/A		0	0	0	3	1	1	0	0	0	0	0	3														0.3	0.9
68477-69-0	270-750-3	270-750-3	Gases (petroleum), butane splitter overheads	270-750-3	#N/A	#N/A	#N/A	#N/A	#REF!	Classified CMR according to Annex VI of Regulation 1272/2008. (Might not apply when contaminants are below below legal thresholds and/or full refining history is known)	Press. Gas Flam. Gas 1 Carc. 1B Muta. 1B	H220 H350 H340	#N/A	#N/A	#N/A	#N/A	#N/A	#N/A	#N/A		0	0	0	3	1	1	0	0	0	0	0	3														0.3	0.9
68477-71-4	270-752-4	270-752-4	Gases (petroleum), catalytic-cracked gas oil depropanizer bottoms, C4-rich acid-free	270-752-4	#N/A	#N/A	#N/A	#N/A	#REF!	Classified CMR according to Annex VI of Regulation 1272/2008. (Might not apply when contaminants are below below legal thresholds and/or full refining history is known)	Press. Gas Flam. Gas 1 Carc. 1B Muta. 1B	H220 H350 H340	#N/A	#N/A	#N/A	#N/A	#N/A	#N/A	#N/A		0	0	0	3	1	1	0	0	0	0	0	3														0.3	0.9
68477-77-0	270-759-2	270-759-2	Gases (petroleum), catalytic reformed naphtha stripper overheads	270-759-2	#N/A	#N/A	#N/A	#N/A	#REF!	Classified CMR according to Annex VI of Regulation 1272/2008. (Might not apply when contaminants are below below legal thresholds and/or full refining history is known)	Press. Gas Flam. Gas 1 Carc. 1B Muta. 1B	H220 H350 H340	#N/A	#N/A	#N/A	#N/A	#N/A	#N/A	#N/A		0	0	0	3	1	1	0	0	0	0	0	3														0.3	0.9
68477-83-8	270-765-5	270-765-5	Gases (petroleum), C3-5 olefinic-paraffinic alkylation feed	270-765-5	#N/A	#N/A	#N/A	#N/A	#REF!	Classified CMR according to Annex VI of Regulation 1272/2008. (Might not apply when contaminants are below below legal thresholds and/or full refining history is known)	Press. Gas Flam. Gas 1 Carc. 1B Muta. 1B	H220 H350 H340	#N/A	#N/A	#N/A	#N/A	#N/A	#N/A	#N/A		0	0	0	3	1	1	0	0	0	0	0	3														0.3	0.9
68477-87-2	270-769-7	270-769-7	Gases (petroleum), deisobutanizer tower overheads	270-769-7	#N/A	#N/A	#N/A	#N/A	#REF!	Classified CMR according to Annex VI of Regulation 1272/2008. (Might not apply when contaminants are below below legal thresholds and/or full refining history is known)	Press. Gas Flam. Gas 1 Carc. 1B Muta. 1B	H220 H350 H340	#N/A	#N/A	#N/A	#N/A	#N/A	#N/A	#N/A		0	0	0	3	1	1	0	0	0	0	0	3														0.3	0.9
68477-90-7	270-772-3	270-772-3	Gases (petroleum), depropanizer dry, propene-rich	270-772-3	#N/A	#N/A	#N/A	#N/A	#REF!	Classified CMR according to Annex VI of Regulation 1272/2008. (Might not apply when contaminants are below below legal thresholds and/or full refining history is known)	Press. Gas Flam. Gas 1 Carc. 1B Muta. 1B	H220 H350 H340	#N/A	#N/A	#N/A	#N/A	#N/A	#N/A	#N/A		0	0	0	3	1	1	0	0	0	0	0	3														0.3	0.9
68478-17-1	270-796-4	270-796-4	Residues (petroleum), heavy coker gas oil and vacuum gas oil	270-796-4	#N/A	#N/A	#N/A	#N/A	#REF!	Classified CMR according to Annex VI of Regulation 1272/2008	Carc. 1B	H350	#N/A	#N/A	#N/A	#N/A	#N/A	#N/A	#N/A		0	0	0	3	1	0	0	0	0	0	0	3														0.3	0.9
68512-62-9	270-984-6	270-984-6	Residues (petroleum), light vacuum	270-984-6	#N/A	#N/A	#N/A	#N/A	#REF!	Classified CMR according to Annex VI of Regulation 1272/2008	Carc. 1B	H350	#N/A	#N/A	#N/A	#N/A	#N/A	#N/A	#N/A		0	0	0	3	1	0	0	0	0	0	0	3														0.3	0.9
68512-91-4	270-990-9	270-990-9	Hydrocarbons, C3-4-rich, petroleum distillate	270-990-9	#N/A	#N/A	#N/A	#N/A	#REF!	Classified CMR according to Annex VI of Regulation 1272/2008. (Might not apply when contaminants are below below legal thresholds and/or full refining history is known)	Press. Gas Flam. Gas 1 Carc. 1B Muta. 1B	H220 H350 H340	#N/A	#N/A	#N/A	#N/A	#N/A	#N/A	#N/A		0	0	0	3	1	1	0	0	0	0	0	3														0.3	0.9
68513-02-0	270-991-4	270-991-4	Naphtha (petroleum), full-range coker	270-991-4	#N/A	#N/A	#N/A	#N/A	#REF!	Classified CMR according to Annex VI of Regulation 1272/2008. (Might not apply when contaminants are below below legal thresholds and/or full refining history is known)	Carc. 1B Muta. 1B Asp. Tox. 1	H350 H340 H304	#N/A	#N/A	#N/A	#N/A	#N/A	#N/A	#N/A		0	0	0	3	1	1	0	0	0	0	0	3														0.3	0.9
68513-03-1	270-993-5	270-993-5	Naphtha (petroleum), light catalytic reformed, arom.-free	270-993-5	#N/A	#N/A	#N/A	#N/A	#REF!	Classified CMR according to Annex VI of Regulation 1272/2008. (Might not apply when contaminants are below below legal thresholds and/or full refining history is known)	Carc. 1B Muta. 1B Asp. Tox. 1	H350 H340 H304	#N/A	#N/A	#N/A	#N/A	#N/A	#N/A	#N/A		0	0	0	3	1	1	0	0	0	0	0	3														0.3	0.9
68513-66-6	271-010-2	271-010-2	Residues (petroleum), alkylation splitter, C4-rich	271-010-2	#N/A	#N/A	#N/A	#N/A	#REF!	Classified CMR according to Annex VI of Regulation 1272/2008. (Might not apply when contaminants are below below legal thresholds and/or full refining history is known)	Press. Gas Flam. Gas 1 Carc. 1B Muta. 1B	H220 H350 H340	#N/A	#N/A	#N/A	#N/A	#N/A	#N/A	#N/A		0	0	0	3	1	1	0	0	0	0	0	3														0.3	0.9
68513-69-9	271-013-9	271-013-9	Residues (petroleum), steam-cracked light	271-013-9	#N/A	#N/A	#N/A	#N/A	#REF!	Classified CMR according to Annex VI of Regulation 1272/2008	Carc. 1B	H350	#N/A	#N/A	#N/A	#N/A	#N/A	#N/A	#N/A		0	0	0	3	1	0	0	0	0	0	0	3														0.3	0.9
68514-79-4	271-058-4	271-058-4	Petroleum products, hydrofiner-powerformer reformates	271-058-4	#N/A	#N/A	#N/A	#N/A	#REF!	Classified CMR according to Annex VI of Regulation 1272/2008. (Might not apply when contaminants are below below legal thresholds and/or full refining history is known)	Carc. 1B Muta. 1B Asp. Tox. 1	H350 H340 H304	#N/A	#N/A	#N/A	#N/A	#N/A	#N/A	#N/A		0	0	0	3	1	1	0	0	0	0	0	3														0.3	0.9
68515-42-4	271-084-6	271-084-6	1,2-Benzenedicarboxylic acid, di-C7-11-branched and linear alkyl esters (DHNUP)	271-084-6	#N/A	271-084-6	271-084-6	#N/A	#REF!	Classified CMR according to Annex VI of Regulation 1272/2008	Repr. 1B	H360Df	#N/A	H360Df	Toxic for reproduction (Article 57c)	H360Df	#N/A	#N/A	#N/A		0	0	0	3	0	0	1	0	0	0	0	3														1	3
68516-20-1	271-138-9	271-138-9	Naphtha (petroleum), steam-cracked middle arom.	271-138-9	#N/A	#N/A	#N/A	#N/A	#REF!	Classified CMR according to Annex VI of Regulation 1272/2008. (Might not apply when contaminants are below below legal thresholds and/or full refining history is known)	Carc. 1B Muta. 1B Asp. Tox. 1	H350 H340 H304	#N/A	#N/A	#N/A	#N/A	#N/A	#N/A	#N/A		0	0	0	3	1	1	0	0	0	0	0	3														0.3	0.9
68527-18-4	271-260-2	271-260-2	Gas oils (petroleum), steam-cracked	271-260-2	#N/A	#N/A	#N/A	#N/A	#REF!	Classified CMR according to Annex VI of Regulation 1272/2008	Carc. 1B	H350	#N/A	#N/A	#N/A	#N/A	#N/A	#N/A	#N/A		0	0	0	3	1	0	0	0	0	0	0	3														0.3	0.9
68527-23-1	271-264-4	271-264-4	Naphtha (petroleum), light steam-cracked arom.	271-264-4	#N/A	#N/A	#N/A	#N/A	#REF!	Classified CMR according to Annex VI of Regulation 1272/2008. (Might not apply when contaminants are below below legal thresholds and/or full refining history is known)	Carc. 1B Muta. 1B Asp. Tox. 1	H350 H340 H304	#N/A	#N/A	#N/A	#N/A	#N/A	#N/A	#N/A		0	0	0	3	1	1	0	0	0	0	0	3														0.3	0.9
68527-26-4	271-266-5	271-266-5	Naphtha (petroleum), light steam-cracked, debenzenized	271-266-5	#N/A	#N/A	#N/A	#N/A	#REF!	Classified CMR according to Annex VI of Regulation 1272/2008. (Might not apply when contaminants are below below legal thresholds and/or full refining history is known)	Carc. 1B Muta. 1B Asp. Tox. 1	H350 H340 H304	#N/A	#N/A	#N/A	#N/A	#N/A	#N/A	#N/A		0	0	0	3	1	1	0	0	0	0	0	3														0.3	0.9
68527-27-5	271-267-0	271-267-0	Naphtha (petroleum), full-range alkylate, butane-contg.	271-267-0	#N/A	#N/A	#N/A	#N/A	#REF!	Classified CMR according to Annex VI of Regulation 1272/2008. (Might not apply when contaminants are below below legal thresholds and/or full refining history is known)	Carc. 1B Muta. 1B Asp. Tox. 1	H350 H340 H304	#N/A	#N/A	#N/A	#N/A	#N/A	#N/A	#N/A		0	0	0	3	1	1	0	0	0	0	0	3														0.3	0.9
68553-00-4	271-384-7	271-384-7	Fuel oil, no. 6	271-384-7	#N/A	#N/A	#N/A	#N/A	#REF!	Classified CMR according to Annex VI of Regulation 1272/2008	Carc. 1B	H350	#N/A	#N/A	#N/A	#N/A	#N/A	#N/A	#N/A		0	0	0	3	1	0	0	0	0	0	0	3														0.3	0.9
68602-83-5	271-624-0	271-624-0	Gases (petroleum), C1-5, wet	271-624-0	#N/A	#N/A	#N/A	#N/A	#REF!	Classified CMR according to Annex VI of Regulation 1272/2008. (Might not apply when contaminants are below below legal thresholds and/or full refining history is known)	Press. Gas Flam. Gas 1 Carc. 1B Muta. 1B	H220 H350 H340	#N/A	#N/A	#N/A	#N/A	#N/A	#N/A	#N/A		0	0	0	3	1	1	0	0	0	0	0	3														0.3	0.9
68603-08-7	271-635-0	271-635-0	Naphtha (petroleum), arom	271-635-0	#N/A	#N/A	#N/A	#N/A	#REF!	Classified CMR according to Annex VI of Regulation 1272/2008. (Might not apply when contaminants are below below legal thresholds and/or full refining history is known)	Carc. 1B Muta. 1B Asp. Tox. 1	H350 H340 H304	#N/A	#N/A	#N/A	#N/A	#N/A	#N/A	#N/A		0	0	0	3	1	1	0	0	0	0	0	3														0.3	0.9
68606-10-0	271-726-5	271-726-5	Gasoline, pyrolysis, debutanizer bottoms	271-726-5	#N/A	#N/A	#N/A	#N/A	#REF!	Classified CMR according to Annex VI of Regulation 1272/2008. (Might not apply when contaminants are below below legal thresholds and/or full refining history is known)	Carc. 1B Muta. 1B Asp. Tox. 1	H350 H340 H304	#N/A	#N/A	#N/A	#N/A	#N/A	#N/A	#N/A		0	0	0	3	1	1	0	0	0	0	0	3														0.3	0.9
68606-11-1	271-727-0	271-727-0	Gasoline, straight-run, topping-plant	271-727-0	#N/A	#N/A	#N/A	#N/A	#REF!	Classified CMR according to Annex VI of Regulation 1272/2008. (Might not apply when contaminants are below below legal thresholds and/or full refining history is known)	Carc. 1B Muta. 1B Asp. Tox. 1	H350 H340 H304	#N/A	#N/A	#N/A	#N/A	#N/A	#N/A	#N/A		0	0	0	3	1	1	0	0	0	0	0	3														0.3	0.9
68606-26-8	271-735-4	271-735-4	Hydrocarbons, C3	271-735-4	#N/A	#N/A	#N/A	#N/A	#REF!	Classified CMR according to Annex VI of Regulation 1272/2008. (Might not apply when contaminants are below below legal thresholds and/or full refining history is known)	Press. Gas Flam. Gas 1 Carc. 1B Muta. 1B	H220 H350 H340	#N/A	#N/A	#N/A	#N/A	#N/A	#N/A	#N/A		0	0	0	3	1	1	0	0	0	0	0	3														0.3	0.9
68607-30-7	271-763-7	271-763-7	Residues (petroleum), topping plant, low-sulfur	271-763-7	#N/A	#N/A	#N/A	#N/A	#REF!	Classified CMR according to Annex VI of Regulation 1272/2008	Carc. 1B	H350	#N/A	#N/A	#N/A	#N/A	#N/A	#N/A	#N/A		0	0	0	3	1	0	0	0	0	0	0	3														0.3	0.9
68783-04-0	272-180-0	272-180-0	Extracts (petroleum), solvent-refined heavy paraffinic distillate solvent	272-180-0	#N/A	#N/A	#N/A	#N/A	#REF!	Classified CMR according to Annex VI of Regulation 1272/2008. (Might not apply when contaminants are below below legal thresholds and/or full refining history is known)	Carc. 1B	H350	#N/A	#N/A	#N/A	#N/A	#N/A	#N/A	#N/A		0	0	0	3	1	0	0	0	0	0	0	3														0.3	0.9
68783-07-3	272-183-7	272-183-7	Gases (petroleum), refinery blend	272-183-7	#N/A	#N/A	#N/A	#N/A	#REF!	Classified CMR according to Annex VI of Regulation 1272/2008. (Might not apply when contaminants are below below legal thresholds and/or full refining history is known)	Press. Gas Flam. Gas 1 Carc. 1B Muta. 1B	H220 H350 H340	#N/A	#N/A	#N/A	#N/A	#N/A	#N/A	#N/A		0	0	0	3	1	1	0	0	0	0	0	3														0.3	0.9
68783-08-4	272-184-2	272-184-2	Gas oils (petroleum), heavy atmospheric	272-184-2	#N/A	#N/A	#N/A	#N/A	#REF!	Classified CMR according to Annex VI of Regulation 1272/2008	Carc. 1B	H350	#N/A	#N/A	#N/A	#N/A	#N/A	#N/A	#N/A		0	0	0	3	1	0	0	0	0	0	0	3														0.3	0.9
68783-12-0	272-186-3	272-186-3	Naphtha (petroleum), unsweetened	272-186-3	#N/A	#N/A	#N/A	#N/A	#REF!	Classified CMR according to Annex VI of Regulation 1272/2008. (Might not apply when contaminants are below below legal thresholds and/or full refining history is known)	Carc. 1B Muta. 1B Asp. Tox. 1	H350 H340 H304	#N/A	#N/A	#N/A	#N/A	#N/A	#N/A	#N/A		0	0	0	3	1	1	0	0	0	0	0	3														0.3	0.9
68783-65-3	272-205-5	272-205-5	Gases (petroleum), C2-4, sweetened	272-205-5	#N/A	#N/A	#N/A	#N/A	#REF!	Classified CMR according to Annex VI of Regulation 1272/2008. (Might not apply when contaminants are below below legal thresholds and/or full refining history is known)	Press. Gas Flam. Gas 1 Carc. 1B Muta. 1B	H220 H350 H340	#N/A	#N/A	#N/A	#N/A	#N/A	#N/A	#N/A		0	0	0	3	1	1	0	0	0	0	0	3														0.3	0.9
68783-66-4	272-206-0	272-206-0	Naphtha (petroleum), light, sweetened	272-206-0	#N/A	#N/A	#N/A	#N/A	#REF!	Classified CMR according to Annex VI of Regulation 1272/2008. (Might not apply when contaminants are below below legal thresholds and/or full refining history is known)	Carc. 1B Muta. 1B Asp. Tox. 1	H350 H340 H304	#N/A	#N/A	#N/A	#N/A	#N/A	#N/A	#N/A		0	0	0	3	1	1	0	0	0	0	0	3														0.3	0.9
68784-26-9	272-234-3	272-234-3	Phenol, dodecyl-, sulfurized, carbonates, calcium salts, overbased	#N/A	#N/A	#N/A	#N/A	272-234-3	#REF!	#N/A	#N/A	#N/A	#N/A	#N/A	#N/A	#N/A	#N/A	CMR#Consumer use#High (aggregated) tonnage#Wide dispersive use	#N/A		0	0	0	3	0	0	0	0	0	0	0	3														0.5	1.5
68814-67-5	272-338-9	272-338-9	Gases (petroleum), refinery	272-338-9	#N/A	#N/A	#N/A	#N/A	#REF!	Classified CMR according to Annex VI of Regulation 1272/2008. (Might not apply when contaminants are below below legal thresholds and/or full refining history is known)	Flam. Gas 1 Muta. 1B Carc. 1A	H220 H340 H350	#N/A	#N/A	#N/A	#N/A	#N/A	#N/A	#N/A		0	0	0	3	1	1	0	0	0	0	0	3														0.3	0.9
68814-89-1	272-342-0	272-342-0	Extracts (petroleum), heavy paraffinic distillates, solvent-deasphalted	272-342-0	#N/A	#N/A	#N/A	#N/A	#REF!	Classified CMR according to Annex VI of Regulation 1272/2008. (Might not apply when contaminants are below below legal thresholds and/or full refining history is known)	Carc. 1B	H350	#N/A	#N/A	#N/A	#N/A	#N/A	#N/A	#N/A		0	0	0	3	1	0	0	0	0	0	0	3														0.3	0.9
68919-10-8	272-883-2	272-883-2	Gases (petroleum), straight-run stabilizer off	272-883-2	#N/A	#N/A	#N/A	#N/A	#REF!	Classified CMR according to Annex VI of Regulation 1272/2008. (Might not apply when contaminants are below below legal thresholds and/or full refining history is known)	Press. Gas Flam. Gas 1 Carc. 1B Muta. 1B	H220 H350 H340	#N/A	#N/A	#N/A	#N/A	#N/A	#N/A	#N/A		0	0	0	3	1	1	0	0	0	0	0	3														0.3	0.9
68919-37-9	272-895-8	272-895-8	Naphtha (petroleum), full-range reformed	272-895-8	#N/A	#N/A	#N/A	#N/A	#REF!	Classified CMR according to Annex VI of Regulation 1272/2008. (Might not apply when contaminants are below below legal thresholds and/or full refining history is known)	Carc. 1B Muta. 1B Asp. Tox. 1	H350 H340 H304	#N/A	#N/A	#N/A	#N/A	#N/A	#N/A	#N/A		0	0	0	3	1	1	0	0	0	0	0	3														0.3	0.9
68921-08-4	272-931-2	272-931-2	Distillates (petroleum), light straight-run gasoline fractionation stabilizer overheads	272-931-2	#N/A	#N/A	#N/A	#N/A	#REF!	Classified CMR according to Annex VI of Regulation 1272/2008. (Might not apply when contaminants are below below legal thresholds and/or full refining history is known)	Carc. 1B Muta. 1B Asp. Tox. 1	H350 H340 H304	#N/A	#N/A	#N/A	#N/A	#N/A	#N/A	#N/A		0	0	0	3	1	1	0	0	0	0	0	3														0.3	0.9
68955-27-1	273-263-4	273-263-4	Distillates (petroleum), petroleum residues vacuum	273-263-4	#N/A	#N/A	#N/A	#N/A	#REF!	Classified CMR according to Annex VI of Regulation 1272/2008	Carc. 1B	H350	#N/A	#N/A	#N/A	#N/A	#N/A	#N/A	#N/A		0	0	0	3	1	0	0	0	0	0	0	3														0.3	0.9
68955-28-2	273-265-5	273-265-5	Gases (petroleum), light steam-cracked, butadiene conc.	273-265-5	#N/A	#N/A	#N/A	#N/A	#REF!	Classified CMR according to Annex VI of Regulation 1272/2008. (Might not apply when contaminants are below below legal thresholds and/or full refining history is known)	Press. Gas Flam. Gas 1 Carc. 1B Muta. 1B	H220 H350 H340	#N/A	#N/A	#N/A	#N/A	#N/A	#N/A	#N/A		0	0	0	3	1	1	0	0	0	0	0	3														0.3	0.9
68955-29-3	273-266-0	273-266-0	Distillates (petroleum), light thermal cracked, debutanized arom.	273-266-0	#N/A	#N/A	#N/A	#N/A	#REF!	Classified CMR according to Annex VI of Regulation 1272/2008. (Might not apply when contaminants are below below legal thresholds and/or full refining history is known)	Carc. 1B Muta. 1B Asp. Tox. 1	H350 H340 H304	#N/A	#N/A	#N/A	#N/A	#N/A	#N/A	#N/A		0	0	0	3	1	1	0	0	0	0	0	3														0.3	0.9
68955-35-1	273-271-8	273-271-8	Naphtha (petroleum), catalytic reformed	273-271-8	#N/A	#N/A	#N/A	#N/A	#REF!	Classified CMR according to Annex VI of Regulation 1272/2008. (Might not apply when contaminants are below below legal thresholds and/or full refining history is known)	Carc. 1B Muta. 1B Asp. Tox. 1	H350 H340 H304	#N/A	#N/A	#N/A	#N/A	#N/A	#N/A	#N/A		0	0	0	3	1	1	0	0	0	0	0	3														0.3	0.9
68989-88-8	273-563-5	273-563-5	Gases (petroleum), crude distn. and catalytic cracking	273-563-5	#N/A	#N/A	#N/A	#N/A	#REF!	Classified CMR according to Annex VI of Regulation 1272/2008. (Might not apply when contaminants are below below legal thresholds and/or full refining history is known)	Press. Gas Flam. Gas 1 Carc. 1B Muta. 1B	H220 H350 H340	#N/A	#N/A	#N/A	#N/A	#N/A	#N/A	#N/A		0	0	0	3	1	1	0	0	0	0	0	3														0.3	0.9
70592-76-6	274-683-0	274-683-0	Distillates (petroleum), intermediate vacuum	274-683-0	#N/A	#N/A	#N/A	#N/A	#REF!	Classified CMR according to Annex VI of Regulation 1272/2008	Carc. 1B	H350	#N/A	#N/A	#N/A	#N/A	#N/A	#N/A	#N/A		0	0	0	3	1	0	0	0	0	0	0	3														0.3	0.9
70592-77-7	274-684-6	274-684-6	Distillates (petroleum), light vacuum	274-684-6	#N/A	#N/A	#N/A	#N/A	#REF!	Classified CMR according to Annex VI of Regulation 1272/2008	Carc. 1B	H350	#N/A	#N/A	#N/A	#N/A	#N/A	#N/A	#N/A		0	0	0	3	1	0	0	0	0	0	0	3														0.3	0.9
70592-78-8	274-685-1	274-685-1	Distillates (petroleum), vacuum	274-685-1	#N/A	#N/A	#N/A	#N/A	#REF!	Classified CMR according to Annex VI of Regulation 1272/2008	Carc. 1B	H350	#N/A	#N/A	#N/A	#N/A	#N/A	#N/A	#N/A		0	0	0	3	1	0	0	0	0	0	0	3														0.3	0.9
70657-70-4	274-724-2	274-724-2	2-methoxypropyl acetate	274-724-2	#N/A	#N/A	#N/A	#N/A	#REF!	Classified CMR according to Annex VI of Regulation 1272/2008	Flam. Liq. 3 Repr. 1B STOT SE 3	H226 H360D *** H335	#N/A	#N/A	#N/A	#N/A	#N/A	#N/A	#N/A		0	0	0	3	0	0	1	0	0	0	0	3														0.3	0.9
71888-89-6	276-158-1	276-158-1	1,2-benzenedicarboxylic acid, di-C6-8-branched alkylesters, C7-rich (DIHP)	276-158-1	#N/A	276-158-1	276-158-1	#N/A	#REF!	Classified CMR according to Annex VI of Regulation 1272/2008	Repr. 1B	H360D***	#N/A	H360D ***	Toxic for reproduction (Article 57c)	H360D ***	#N/A	#N/A	#N/A		0	0	0	3	0	0	1	0	0	0	0	3														1	3
72623-85-9	276-736-3	276-736-3	Lubricating oils (petroleum), C20-50, hydrotreated neutral oil-based, high-viscosity	276-736-3	#N/A	#N/A	#N/A	#N/A	#REF!	Classified CMR according to Annex VI of Regulation 1272/2008. (Might not apply when contaminants are below below legal thresholds and/or full refining history is known)	Carc. 1B	H350	#N/A	#N/A	#N/A	#N/A	#N/A	#N/A	#N/A		0	0	0	3	1	0	0	0	0	0	0	3														0.3	0.9
72623-86-0	276-737-9	276-737-9	Lubricating oils (petroleum), C15-30, hydrotreated neutral oil-based	276-737-9	#N/A	#N/A	#N/A	#N/A	#REF!	Classified CMR according to Annex VI of Regulation 1272/2008. (Might not apply when contaminants are below below legal thresholds and/or full refining history is known)	Carc. 1B	H350	#N/A	#N/A	#N/A	#N/A	#N/A	#N/A	#N/A		0	0	0	3	1	0	0	0	0	0	0	3														0.3	0.9
72623-87-1	276-738-4	276-738-4	Lubricating oils (petroleum), C20-50, hydrotreated neutral oil-based	276-738-4	#N/A	#N/A	#N/A	#N/A	#REF!	Classified CMR according to Annex VI of Regulation 1272/2008. (Might not apply when contaminants are below below legal thresholds and/or full refining history is known)	Carc. 1B	H350	#N/A	#N/A	#N/A	#N/A	#N/A	#N/A	#N/A		0	0	0	3	1	0	0	0	0	0	0	3														0.3	0.9
74869-22-0	278-012-2	278-012-2	Lubricating oils	278-012-2	#N/A	#N/A	#N/A	#N/A	#REF!	Classified CMR according to Annex VI of Regulation 1272/2008. (Might not apply when contaminants are below below legal thresholds and/or full refining history is known)	Carc. 1B	H350	#N/A	#N/A	#N/A	#N/A	#N/A	#N/A	#N/A		0	0	0	3	1	0	0	0	0	0	0	3														0.3	0.9
84777-06-0	284-032-2	284-032-2	1,2-Benzenedicarboxylic acid, dipentyl ester, branched and linear	284-032-2	#N/A	284-032-2	284-032-2	#N/A	#REF!	Classified CMR according to Annex VI of Regulation 1272/2008	Repr. 1B Aquatic Acute 1	H360FD H400	#N/A	H360FD H400	Toxic for reproduction (Article 57c)	H360FD H400	#N/A	#N/A	#N/A		0	0	0	3	0	0	1	0	0	0	0	3														1	3
84989-04-8	284-892-9	284-892-9	Tar acids, methylphenol fraction	284-892-9	#N/A	#N/A	#N/A	#N/A	#REF!	Classified CMR according to Annex VI of Regulation 1272/2008. (Might not apply when contaminants are below below legal thresholds and/or full refining history is known)	Carc. 1B Muta. 1B	H350 H340	#N/A	#N/A	#N/A	#N/A	#N/A	#N/A	#N/A		0	0	0	3	1	1	0	0	0	0	0	3														0.3	0.9
84989-06-0	284-895-5	284-895-5	Tar acids, xylenol fraction	284-895-5	#N/A	#N/A	#N/A	#N/A	#REF!	Classified CMR according to Annex VI of Regulation 1272/2008. (Might not apply when contaminants are below below legal thresholds and/or full refining history is known)	Carc. 1B Muta. 1B	H350 H340	#N/A	#N/A	#N/A	#N/A	#N/A	#N/A	#N/A		0	0	0	3	1	1	0	0	0	0	0	3														0.3	0.9
84989-07-1	284-896-0	284-896-0	Tar acids, 3,5-xylenol fraction	284-896-0	#N/A	#N/A	#N/A	#N/A	#REF!	Classified CMR according to Annex VI of Regulation 1272/2008. (Might not apply when contaminants are below below legal thresholds and/or full refining history is known)	Muta. 1B Carc. 1B	H340 H350	#N/A	#N/A	#N/A	#N/A	#N/A	#N/A	#N/A		0	0	0	3	1	1	0	0	0	0	0	3														0.3	0.9
85116-53-6	285-505-6	285-505-6	Distillates (petroleum), hydrodesulfurized thermal cracked middle	285-505-6	#N/A	#N/A	#N/A	#N/A	#REF!	Classified CMR according to Annex VI of Regulation 1272/2008	Carc. 1B	H350	#N/A	#N/A	#N/A	#N/A	#N/A	#N/A	#N/A		0	0	0	3	1	0	0	0	0	0	0	3														0.3	0.9
85116-58-1	285-509-8	285-509-8	Distillates (petroleum), catalytic reformed hydrotreated light, C8-12 arom. fraction	285-509-8	#N/A	#N/A	#N/A	#N/A	#REF!	Classified CMR according to Annex VI of Regulation 1272/2008. (Might not apply when contaminants are below below legal thresholds and/or full refining history is known)	Carc. 1B Muta. 1B Asp. Tox. 1	H350 H340 H304	#N/A	#N/A	#N/A	#N/A	#N/A	#N/A	#N/A		0	0	0	3	1	1	0	0	0	0	0	3														0.3	0.9
85116-59-2	285-510-3	285-510-3	Naphtha (petroleum), catalytic reformed light, arom.-free fraction	285-510-3	#N/A	#N/A	#N/A	#N/A	#REF!	Classified CMR according to Annex VI of Regulation 1272/2008. (Might not apply when contaminants are below below legal thresholds and/or full refining history is known)	Carc. 1B Muta. 1B Asp. Tox. 1	H350 H340 H304	#N/A	#N/A	#N/A	#N/A	#N/A	#N/A	#N/A		0	0	0	3	1	1	0	0	0	0	0	3														0.3	0.9
85536-20-5	287-502-5	287-502-5	Solvent naphtha (coal), xylene-styrene cut	287-502-5	#N/A	#N/A	#N/A	#N/A	#REF!	Classified CMR according to Annex VI of Regulation 1272/2008. (Might not apply when contaminants are below below legal thresholds and/or full refining history is known)	Carc. 1B Muta. 1B	H350 H340	#N/A	#N/A	#N/A	#N/A	#N/A	#N/A	#N/A		0	0	0	3	1	1	0	0	0	0	0	3														0.3	0.9
86290-81-5	289-220-8	289-220-8	Gasoline	289-220-8	#N/A	#N/A	#N/A	#N/A	#REF!	Classified CMR according to Annex VI of Regulation 1272/2008. (Might not apply when contaminants are below below legal thresholds and/or full refining history is known)	Carc. 1B Muta. 1B Asp. Tox. 1	H350 H340 H304	#N/A	#N/A	#N/A	#N/A	#N/A	#N/A	#N/A		0	0	0	3	1	1	0	0	0	0	0	3														0.3	0.9
87741-01-3	289-339-5	289-339-5	Hydrocarbons, C4	289-339-5	#N/A	#N/A	#N/A	#N/A	#REF!	Classified CMR according to Annex VI of Regulation 1272/2008. (Might not apply when contaminants are below below legal thresholds and/or full refining history is known)	Press. Gas Flam. Gas 1 Carc. 1B Muta. 1B	H220 H350 H340	#N/A	#N/A	#N/A	#N/A	#N/A	#N/A	#N/A		0	0	0	3	1	1	0	0	0	0	0	3														0.3	0.9
90622-53-0	292-454-3	292-454-3	Alkanes, C12-26-branched and linear	292-454-3	#N/A	#N/A	#N/A	#N/A	#REF!	Classified CMR according to Annex VI of Regulation 1272/2008. (Might not apply when contaminants are below below legal thresholds and/or full refining history is known)	Carc. 1B	H350	#N/A	#N/A	#N/A	#N/A	#N/A	#N/A	#N/A		0	0	0	3	1	0	0	0	0	0	0	3														0.3	0.9
90640-84-9	292-605-3	292-605-3	Creosote oil, acenaphthene fraction	292-605-3	292-605-3	#N/A	#N/A	#N/A	#REF!	Classified CMR according to Annex VI of Regulation 1272/2008. (Might not apply when contaminants are below below legal thresholds and/or full refining history is known)	Carc. 1B	H350	H350	#N/A	#N/A	#N/A	#N/A	#N/A	#N/A		0	0	0	3	1	0	0	0	0	0	0	3														1	3
90640-86-1	292-607-4	292-607-4	Distillates (coal tar), heavy oils	292-607-4	#N/A	#N/A	#N/A	#N/A	#REF!	Classified CMR according to Annex VI of Regulation 1272/2008	Carc. 1B	H350	#N/A	#N/A	#N/A	#N/A	#N/A	#N/A	#N/A		0	0	0	3	1	0	0	0	0	0	0	3														0.3	0.9
90669-74-2	292-656-1	292-656-1	Residual oils (petroleum), hydrotreated solvent dewaxed	292-656-1	#N/A	#N/A	#N/A	#N/A	#REF!	Classified CMR according to Annex VI of Regulation 1272/2008. (Might not apply when contaminants are below below legal thresholds and/or full refining history is known)	Carc. 1B	H350	#N/A	#N/A	#N/A	#N/A	#N/A	#N/A	#N/A		0	0	0	3	1	0	0	0	0	0	0	3														0.3	0.9
90669-76-4	292-658-2	292-658-2	Residues (petroleum), vacuum, light	292-658-2	#N/A	#N/A	#N/A	#N/A	#REF!	Classified CMR according to Annex VI of Regulation 1272/2008	Carc. 1B	H350	#N/A	#N/A	#N/A	#N/A	#N/A	#N/A	#N/A		0	0	0	3	1	0	0	0	0	0	0	3														0.3	0.9
90669-78-6	292-660-3	292-660-3	Slack wax (petroleum), clay-treated	292-660-3	#N/A	#N/A	#N/A	#N/A	#REF!	Classified CMR according to Annex VI of Regulation 1272/2008. (Might not apply when contaminants are below below legal thresholds and/or full refining history is known)	Carc. 1B	H350	#N/A	#N/A	#N/A	#N/A	#N/A	#N/A	#N/A		0	0	0	3	1	0	0	0	0	0	0	3														0.3	0.9
90989-38-1	292-694-9	292-694-9	Aromatic hydrocarbons, C8	292-694-9	#N/A	#N/A	#N/A	#N/A	#REF!	Classified CMR according to Annex VI of Regulation 1272/2008. (Might not apply when contaminants are below below legal thresholds and/or full refining history is known)	Carc. 1B Muta. 1B	H350 H340	#N/A	#N/A	#N/A	#N/A	#N/A	#N/A	#N/A		0	0	0	3	1	1	0	0	0	0	0	3														0.3	0.9
90989-41-6	292-697-5	292-697-5	Aromatic hydrocarbons, C6-10, C8-rich	292-697-5	#N/A	#N/A	#N/A	#N/A	#REF!	Classified CMR according to Annex VI of Regulation 1272/2008. (Might not apply when contaminants are below below legal thresholds and/or full refining history is known)	Carc. 1B Muta. 1B	H350 H340	#N/A	#N/A	#N/A	#N/A	#N/A	#N/A	#N/A		0	0	0	3	1	1	0	0	0	0	0	3														0.3	0.9
91770-57-9	294-843-3	294-843-3	Residual oils (petroleum), catalytic dewaxed	294-843-3	#N/A	#N/A	#N/A	#N/A	#REF!	Classified CMR according to Annex VI of Regulation 1272/2008. (Might not apply when contaminants are below below legal thresholds and/or full refining history is known)	Carc. 1B	H350	#N/A	#N/A	#N/A	#N/A	#N/A	#N/A	#N/A		0	0	0	3	1	0	0	0	0	0	0	3														0.3	0.9
91995-18-5	295-279-0	295-279-0	Aromatic hydrocarbons, C8, catalytic reforming-derived	295-279-0	#N/A	#N/A	#N/A	#N/A	#REF!	Classified CMR according to Annex VI of Regulation 1272/2008. (Might not apply when contaminants are below below legal thresholds and/or full refining history is known)	Carc. 1B Muta. 1B Asp. Tox. 1	H350 H340 H304	#N/A	#N/A	#N/A	#N/A	#N/A	#N/A	#N/A		0	0	0	3	1	1	0	0	0	0	0	3														0.3	0.9
91995-38-9	295-298-4	295-298-4	Hydrocarbons, C4-6, depentanizer lights, arom. Hydrotreater	295-298-4	#N/A	#N/A	#N/A	#N/A	#REF!	Classified CMR according to Annex VI of Regulation 1272/2008. (Might not apply when contaminants are below below legal thresholds and/or full refining history is known)	Carc. 1B Muta. 1B Asp. Tox. 1	H350 H340 H304	#N/A	#N/A	#N/A	#N/A	#N/A	#N/A	#N/A		0	0	0	3	1	1	0	0	0	0	0	3														0.3	0.9
91995-40-3	295-301-9	295-301-9	Distillates (petroleum), dewaxed light paraffinic, hydrotreated	295-301-9	#N/A	#N/A	#N/A	#N/A	#REF!	Classified CMR according to Annex VI of Regulation 1272/2008. (Might not apply when contaminants are below below legal thresholds and/or full refining history is known)	Carc. 1B	H350	#N/A	#N/A	#N/A	#N/A	#N/A	#N/A	#N/A		0	0	0	3	1	0	0	0	0	0	0	3														0.3	0.9
91995-41-4	295-302-4	295-302-4	Distillates (petroleum), heat-soaked steam-cracked naphtha, C5-rich	295-302-4	#N/A	#N/A	#N/A	#N/A	#REF!	Classified CMR according to Annex VI of Regulation 1272/2008. (Might not apply when contaminants are below below legal thresholds and/or full refining history is known)	Carc. 1B Muta. 1B Asp. Tox. 1	H350 H340 H304	#N/A	#N/A	#N/A	#N/A	#N/A	#N/A	#N/A		0	0	0	3	1	1	0	0	0	0	0	3														0.3	0.9
91995-50-5	295-311-3	295-311-3	Distillates (petroleum), naphtha steam cracking-derived, hydrotreated light arom.	295-311-3	#N/A	#N/A	#N/A	#N/A	#REF!	Classified CMR according to Annex VI of Regulation 1272/2008. (Might not apply when contaminants are below below legal thresholds and/or full refining history is known)	Carc. 1B Muta. 1B Asp. Tox. 1	H350 H340 H304	#N/A	#N/A	#N/A	#N/A	#N/A	#N/A	#N/A		0	0	0	3	1	1	0	0	0	0	0	3														0.3	0.9
91995-68-5	295-331-2	295-331-2	Extracts (petroleum), catalytic reformed light naphtha solvent	295-331-2	#N/A	#N/A	#N/A	#N/A	#REF!	Classified CMR according to Annex VI of Regulation 1272/2008. (Might not apply when contaminants are below below legal thresholds and/or full refining history is known)	Carc. 1B Muta. 1B Asp. Tox. 1	H350 H340 H304	#N/A	#N/A	#N/A	#N/A	#N/A	#N/A	#N/A		0	0	0	3	1	1	0	0	0	0	0	3														0.3	0.9
92045-12-0	295-394-6	295-394-6	Foots oil (petroleum), hydrotreated	295-394-6	#N/A	#N/A	#N/A	#N/A	#REF!	Classified CMR according to Annex VI of Regulation 1272/2008. (Might not apply when contaminants are below below legal thresholds and/or full refining history is known)	Carc. 1B	H350	#N/A	#N/A	#N/A	#N/A	#N/A	#N/A	#N/A		0	0	0	3	1	0	0	0	0	0	0	3														0.3	0.9
92045-14-2	295-396-7	295-396-7	Fuel oil, heavy, high-sulfur	295-396-7	#N/A	#N/A	#N/A	#N/A	#REF!	Classified CMR according to Annex VI of Regulation 1272/2008	Carc. 1B	H350	#N/A	#N/A	#N/A	#N/A	#N/A	#N/A	#N/A		0	0	0	3	1	0	0	0	0	0	0	3														0.3	0.9
92045-23-3	295-405-4	295-405-4	Hydrocarbons, C4, steam-cracker distillate	295-405-4	#N/A	#N/A	#N/A	#N/A	#REF!	Classified CMR according to Annex VI of Regulation 1272/2008. (Might not apply when contaminants are below below legal thresholds and/or full refining history is known)	Press. Gas Flam. Gas 1 Carc. 1B Muta. 1B	H220 H350 H340	#N/A	#N/A	#N/A	#N/A	#N/A	#N/A	#N/A		0	0	0	3	1	1	0	0	0	0	0	3														0.3	0.9
92045-29-9	295-411-7	295-411-7	Gas oils (petroleum), thermal-cracked, hydrodesulfurized	295-411-7	#N/A	#N/A	#N/A	#N/A	#REF!	Classified CMR according to Annex VI of Regulation 1272/2008	Carc. 1B	H350	#N/A	#N/A	#N/A	#N/A	#N/A	#N/A	#N/A		0	0	0	3	1	0	0	0	0	0	0	3														0.3	0.9
92045-50-6	295-431-6	295-431-6	Naphtha (petroleum), heavy catalytic cracked, sweetened	295-431-6	#N/A	#N/A	#N/A	#N/A	#REF!	Classified CMR according to Annex VI of Regulation 1272/2008. (Might not apply when contaminants are below below legal thresholds and/or full refining history is known)	Carc. 1B Muta. 1B Asp. Tox. 1	H350 H340 H304	#N/A	#N/A	#N/A	#N/A	#N/A	#N/A	#N/A		0	0	0	3	1	1	0	0	0	0	0	3														0.3	0.9
92045-52-8	295-433-7	295-433-7	Naphtha (petroleum), hydrodesulfurized full-range	295-433-7	#N/A	#N/A	#N/A	#N/A	#REF!	Classified CMR according to Annex VI of Regulation 1272/2008. (Might not apply when contaminants are below below legal thresholds and/or full refining history is known)	Carc. 1B Muta. 1B Asp. Tox. 1	H350 H340 H304	#N/A	#N/A	#N/A	#N/A	#N/A	#N/A	#N/A		0	0	0	3	1	1	0	0	0	0	0	3														0.3	0.9
92045-53-9	295-434-2	295-434-2	Naphtha (petroleum), hydrodesulfurized light, dearomatized	295-434-2	#N/A	#N/A	#N/A	#N/A	#REF!	Classified CMR according to Annex VI of Regulation 1272/2008. (Might not apply when contaminants are below below legal thresholds and/or full refining history is known)	Carc. 1B Muta. 1B Asp. Tox. 1	H350 H340 H304	#N/A	#N/A	#N/A	#N/A	#N/A	#N/A	#N/A		0	0	0	3	1	1	0	0	0	0	0	3														0.3	0.9
92045-57-3	295-438-4	295-438-4	Naphtha (petroleum), hydrotreated light steam-cracked	295-438-4	#N/A	#N/A	#N/A	#N/A	#REF!	Classified CMR according to Annex VI of Regulation 1272/2008. (Might not apply when contaminants are below below legal thresholds and/or full refining history is known)	Carc. 1B Muta. 1B Asp. Tox. 1	H350 H340 H304	#N/A	#N/A	#N/A	#N/A	#N/A	#N/A	#N/A		0	0	0	3	1	1	0	0	0	0	0	3														0.3	0.9
92045-58-4	295-440-5	295-440-5	Naphtha (petroleum), isomerization, C6-fraction	295-440-5	#N/A	#N/A	#N/A	#N/A	#REF!	Classified CMR according to Annex VI of Regulation 1272/2008. (Might not apply when contaminants are below below legal thresholds and/or full refining history is known)	Carc. 1B Muta. 1B Asp. Tox. 1	H350 H340 H304	#N/A	#N/A	#N/A	#N/A	#N/A	#N/A	#N/A		0	0	0	3	1	1	0	0	0	0	0	3														0.3	0.9
92045-59-5	295-441-0	295-441-0	Naphtha (petroleum), light catalytic cracked sweetened	295-441-0	#N/A	#N/A	#N/A	#N/A	#REF!	Classified CMR according to Annex VI of Regulation 1272/2008. (Might not apply when contaminants are below below legal thresholds and/or full refining history is known)	Carc. 1B Muta. 1B Asp. Tox. 1	H350 H340 H304	#N/A	#N/A	#N/A	#N/A	#N/A	#N/A	#N/A		0	0	0	3	1	1	0	0	0	0	0	3														0.3	0.9
92045-60-8	295-442-6	295-442-6	Naphtha (petroleum), light, C5-rich, sweetened	295-442-6	#N/A	#N/A	#N/A	#N/A	#REF!	Classified CMR according to Annex VI of Regulation 1272/2008. (Might not apply when contaminants are below below legal thresholds and/or full refining history is known)	Carc. 1B Muta. 1B Asp. Tox. 1	H350 H340 H304	#N/A	#N/A	#N/A	#N/A	#N/A	#N/A	#N/A		0	0	0	3	1	1	0	0	0	0	0	3														0.3	0.9
92045-61-9	295-443-1	295-443-1	Hydrocarbons, C4-12, naphtha-cracking, hydrotreated	295-443-1	#N/A	#N/A	#N/A	#N/A	#REF!	Classified CMR according to Annex VI of Regulation 1272/2008. (Might not apply when contaminants are below below legal thresholds and/or full refining history is known)	Carc. 1B Muta. 1B Asp. Tox. 1	H350 H340 H304	#N/A	#N/A	#N/A	#N/A	#N/A	#N/A	#N/A		0	0	0	3	1	1	0	0	0	0	0	3														0.3	0.9
92045-63-1	295-445-2	295-445-2	Hydrocarbons, C4-11, naphtha-cracking, arom.-free	295-445-2	#N/A	#N/A	#N/A	#N/A	#REF!	Classified CMR according to Annex VI of Regulation 1272/2008. (Might not apply when contaminants are below below legal thresholds and/or full refining history is known)	Carc. 1B Muta. 1B Asp. Tox. 1	H350 H340 H304	#N/A	#N/A	#N/A	#N/A	#N/A	#N/A	#N/A		0	0	0	3	1	1	0	0	0	0	0	3														0.3	0.9
92045-64-2	295-446-8	295-446-8	Hydrocarbons, C6-7, naphtha-cracking, solvent-refined	295-446-8	#N/A	#N/A	#N/A	#N/A	#REF!	Classified CMR according to Annex VI of Regulation 1272/2008. (Might not apply when contaminants are below below legal thresholds and/or full refining history is known)	Carc. 1B Muta. 1B Asp. Tox. 1	H350 H340 H304	#N/A	#N/A	#N/A	#N/A	#N/A	#N/A	#N/A		0	0	0	3	1	1	0	0	0	0	0	3														0.3	0.9
92045-77-7	295-459-9	295-459-9	Petrolatum (petroleum), hydrotreated	295-459-9	#N/A	#N/A	#N/A	#N/A	#REF!	Classified CMR according to Annex VI of Regulation 1272/2008. (Might not apply when contaminants are below below legal thresholds and/or full refining history is known)	Carc. 1B	H350	#N/A	#N/A	#N/A	#N/A	#N/A	#N/A	#N/A		0	0	0	3	1	0	0	0	0	0	0	3														0.3	0.9
92045-80-2	295-463-0	295-463-0	Petroleum gases, liquefied, sweetened, C4 fraction	295-463-0	#N/A	#N/A	#N/A	#N/A	#REF!	Classified CMR according to Annex VI of Regulation 1272/2008. (Might not apply when contaminants are below below legal thresholds and/or full refining history is known)	Press. Gas Flam. Gas 1 Carc. 1B Muta. 1B	H220 H350 H340	#N/A	#N/A	#N/A	#N/A	#N/A	#N/A	#N/A		0	0	0	3	1	1	0	0	0	0	0	3														0.3	0.9
92061-97-7	295-511-0	295-511-0	Residues (petroleum), catalytic cracking	295-511-0	#N/A	#N/A	#N/A	#N/A	#REF!	Classified CMR according to Annex VI of Regulation 1272/2008	Carc. 1B	H350	#N/A	#N/A	#N/A	#N/A	#N/A	#N/A	#N/A		0	0	0	3	1	0	0	0	0	0	0	3														0.3	0.9
92062-09-4	295-523-6	295-523-6	Slack wax (petroleum), hydrotreated	295-523-6	#N/A	#N/A	#N/A	#N/A	#REF!	Classified CMR according to Annex VI of Regulation 1272/2008. (Might not apply when contaminants are below below legal thresholds and/or full refining history is known)	Carc. 1B	H350	#N/A	#N/A	#N/A	#N/A	#N/A	#N/A	#N/A		0	0	0	3	1	0	0	0	0	0	0	3														0.3	0.9
92062-36-7	295-551-9	295-551-9	Aromatic hydrocarbons, C9-12, benzene distn.	295-551-9	#N/A	#N/A	#N/A	#N/A	#REF!	Classified CMR according to Annex VI of Regulation 1272/2008. (Might not apply when contaminants are below below legal thresholds and/or full refining history is known)	Carc. 1B Muta. 1B	H350 H340	#N/A	#N/A	#N/A	#N/A	#N/A	#N/A	#N/A		0	0	0	3	1	1	0	0	0	0	0	3														0.3	0.9
93165-19-6	296-903-4	296-903-4	Distillates (petroleum), C6-rich	296-903-4	#N/A	#N/A	#N/A	#N/A	#REF!	Classified CMR according to Annex VI of Regulation 1272/2008. (Might not apply when contaminants are below below legal thresholds and/or full refining history is known)	Carc. 1B Muta. 1B Asp. Tox. 1	H350 H340 H304	#N/A	#N/A	#N/A	#N/A	#N/A	#N/A	#N/A		0	0	0	3	1	1	0	0	0	0	0	3														0.3	0.9
93571-75-6	297-401-8	297-401-8	Aromatic hydrocarbons, C7-12, C8-rich	297-401-8	#N/A	#N/A	#N/A	#N/A	#REF!	Classified CMR according to Annex VI of Regulation 1272/2008. (Might not apply when contaminants are below below legal thresholds and/or full refining history is known)	Carc. 1B Muta. 1B Asp. Tox. 1	H350 H340 H304	#N/A	#N/A	#N/A	#N/A	#N/A	#N/A	#N/A		0	0	0	3	1	1	0	0	0	0	0	3														0.3	0.9
93572-29-3	297-458-9	297-458-9	Gasoline, C5-11, high-octane stabilized reformed	297-458-9	#N/A	#N/A	#N/A	#N/A	#REF!	Classified CMR according to Annex VI of Regulation 1272/2008. (Might not apply when contaminants are below below legal thresholds and/or full refining history is known)	Carc. 1B Muta. 1B Asp. Tox. 1	H350 H340 H304	#N/A	#N/A	#N/A	#N/A	#N/A	#N/A	#N/A		0	0	0	3	1	1	0	0	0	0	0	3														0.3	0.9
93572-35-1	297-465-7	297-465-7	Hydrocarbons, C7-12, C>9-arom.-rich, reforming heavy fraction	297-465-7	#N/A	#N/A	#N/A	#N/A	#REF!	Classified CMR according to Annex VI of Regulation 1272/2008. (Might not apply when contaminants are below below legal thresholds and/or full refining history is known)	Carc. 1B Muta. 1B Asp. Tox. 1	H350 H340 H304	#N/A	#N/A	#N/A	#N/A	#N/A	#N/A	#N/A		0	0	0	3	1	1	0	0	0	0	0	3														0.3	0.9
93572-36-2	297-466-2	297-466-2	Hydrocarbons, C5-11, nonaroms.-rich, reforming light fraction	297-466-2	#N/A	#N/A	#N/A	#N/A	#REF!	Classified CMR according to Annex VI of Regulation 1272/2008. (Might not apply when contaminants are below below legal thresholds and/or full refining history is known)	Carc. 1B Muta. 1B Asp. Tox. 1	H350 H340 H304	#N/A	#N/A	#N/A	#N/A	#N/A	#N/A	#N/A		0	0	0	3	1	1	0	0	0	0	0	3														0.3	0.9
93572-43-1	297-474-6	297-474-6	Lubricating oils (petroleum), base oils, paraffinic	297-474-6	#N/A	#N/A	#N/A	#N/A	#REF!	Classified CMR according to Annex VI of Regulation 1272/2008. (Might not apply when contaminants are below below legal thresholds and/or full refining history is known)	Carc. 1B	H350	#N/A	#N/A	#N/A	#N/A	#N/A	#N/A	#N/A		0	0	0	3	1	0	0	0	0	0	0	3														0.3	0.9
93763-33-8	297-852-0	297-852-0	Hydrocarbons, C6-11, hydrotreated, dearomatized	297-852-0	#N/A	#N/A	#N/A	#N/A	#REF!	Classified CMR according to Annex VI of Regulation 1272/2008. (Might not apply when contaminants are below below legal thresholds and/or full refining history is known)	Carc. 1B Muta. 1B Asp. Tox. 1	H350 H340 H304	#N/A	#N/A	#N/A	#N/A	#N/A	#N/A	#N/A		0	0	0	3	1	1	0	0	0	0	0	3														0.3	0.9
93821-66-0	298-754-0	298-754-0	Residual oils (petroleum)	298-754-0	#N/A	#N/A	#N/A	#N/A	#REF!	Classified CMR according to Annex VI of Regulation 1272/2008	Carc. 1B	H350	#N/A	#N/A	#N/A	#N/A	#N/A	#N/A	#N/A		0	0	0	3	1	0	0	0	0	0	0	3														0.3	0.9
93924-32-4	300-226-2	300-226-2	Foots oil (petroleum), clay-treated	300-226-2	#N/A	#N/A	#N/A	#N/A	#REF!	Classified CMR according to Annex VI of Regulation 1272/2008	Carc. 1B Flam. Gas 1 Press.Gas	H350 H220 H280	#N/A	#N/A	#N/A	#N/A	#N/A	#N/A	#N/A		0	0	0	3	1	0	0	0	0	0	0	3														0.3	0.9
93924-33-5	300-227-8	300-227-8	Gas oils, paraffinic	300-227-8	#N/A	#N/A	#N/A	#N/A	#REF!	Classified CMR according to Annex VI of Regulation 1272/2008. (Might not apply when contaminants are below below legal thresholds and/or full refining history is known)	Carc. 1B	H350	#N/A	#N/A	#N/A	#N/A	#N/A	#N/A	#N/A		0	0	0	3	1	0	0	0	0	0	0	3														0.3	0.9
94114-03-1	302-639-3	302-639-3	Gasoline, pyrolysis, hydrogenated	302-639-3	#N/A	#N/A	#N/A	#N/A	#REF!	Classified CMR according to Annex VI of Regulation 1272/2008. (Might not apply when contaminants are below below legal thresholds and/or full refining history is known)	Carc. 1B Muta. 1B Asp. Tox. 1	H350 H340 H304	#N/A	#N/A	#N/A	#N/A	#N/A	#N/A	#N/A		0	0	0	3	1	1	0	0	0	0	0	3														0.3	0.9
94733-08-1	305-588-5	305-588-5	Distillates (petroleum), solvent-refined hydrotreated heavy, hydrogenated	305-588-5	#N/A	#N/A	#N/A	#N/A	#REF!	Classified CMR according to Annex VI of Regulation 1272/2008. (Might not apply when contaminants are below below legal thresholds and/or full refining history is known)	Carc. 1B	H350	#N/A	#N/A	#N/A	#N/A	#N/A	#N/A	#N/A		0	0	0	3	1	0	0	0	0	0	0	3														0.3	0.9
94733-15-0	305-594-8	305-594-8	Lubricating oils (petroleum), C18-40, solvent-dewaxed hydrocracked distillate-based	305-594-8	#N/A	#N/A	#N/A	#N/A	#REF!	Classified CMR according to Annex VI of Regulation 1272/2008. (Might not apply when contaminants are below below legal thresholds and/or full refining history is known)	Carc. 1B	H350	#N/A	#N/A	#N/A	#N/A	#N/A	#N/A	#N/A		0	0	0	3	1	0	0	0	0	0	0	3														0.3	0.9
95465-89-7	306-004-1	306-004-1	Hydrocarbons, C4, 1,3-butadiene- and isobutene-free	306-004-1	#N/A	#N/A	#N/A	#N/A	#REF!	Classified CMR according to Annex VI of Regulation 1272/2008. (Might not apply when contaminants are below below legal thresholds and/or full refining history is known)	Press. Gas Flam. Gas 1 Carc. 1B Muta. 1B	H220 H350 H340	#N/A	#N/A	#N/A	#N/A	#N/A	#N/A	#N/A		0	0	0	3	1	1	0	0	0	0	0	3														0.3	0.9
97862-82-3	308-132-3	308-132-3	Hydrocarbons, C17-30, hydrotreated distillates, distn. lights	308-132-3	#N/A	#N/A	#N/A	#N/A	#REF!	Classified CMR according to Annex VI of Regulation 1272/2008. (Might not apply when contaminants are below below legal thresholds and/or full refining history is known)	Carc. 1B	H350	#N/A	#N/A	#N/A	#N/A	#N/A	#N/A	#N/A		0	0	0	3	1	0	0	0	0	0	0	3														0.3	0.9
97925-95-6	-	308-208-6	Ethanol, 2,2'-iminobis-, N-(C13-15- branched and linear alkyl) derivs.	308-208-6	#N/A	#N/A	#N/A	#N/A	#REF!	Classified CMR according to Annex VI of Regulation 1272/2008	Repr. 1B	H360D	#N/A	#N/A	#N/A	#N/A	#N/A	#N/A	#N/A		0	0	0	3	0	0	1	0	0	0	0	3														0.3	0.9
98219-47-7	308-714-7	308-714-7	Naphtha (petroleum), light steam-cracked, thermally treated	308-714-7	#N/A	#N/A	#N/A	#N/A	#REF!	Classified CMR according to Annex VI of Regulation 1272/2008. (Might not apply when contaminants are below below legal thresholds and/or full refining history is known)	Carc. 1B Muta. 1B Asp. Tox. 1	H350 H340 H304	#N/A	#N/A	#N/A	#N/A	#N/A	#N/A	#N/A		0	0	0	3	1	1	0	0	0	0	0	3														0.3	0.9
98219-64-8	308-733-0	308-733-0	Residues, steam cracked, thermally treated	308-733-0	#N/A	#N/A	#N/A	#N/A	#REF!	Classified CMR according to Annex VI of Regulation 1272/2008	Carc. 1B	H350	#N/A	#N/A	#N/A	#N/A	#N/A	#N/A	#N/A		0	0	0	3	1	0	0	0	0	0	0	3														0.3	0.9
100684-33-1	309-706-6	309-706-6	Petrolatum (petroleum), clay-treated	309-706-6	#N/A	#N/A	#N/A	#N/A	#REF!	Classified CMR according to Annex VI of Regulation 1272/2008. (Might not apply when contaminants are below below legal thresholds and/or full refining history is known)	Carc. 1B	H350	#N/A	#N/A	#N/A	#N/A	#N/A	#N/A	#N/A		0	0	0	3	1	0	0	0	0	0	0	3														0.3	0.9
101316-59-0	309-865-1	309-865-1	Distillates (petroleum), hydrodesulfurized middle coker	309-865-1	#N/A	#N/A	#N/A	#N/A	#REF!	Classified CMR according to Annex VI of Regulation 1272/2008	Carc. 1B	H350	#N/A	#N/A	#N/A	#N/A	#N/A	#N/A	#N/A		0	0	0	3	1	0	0	0	0	0	0	3														0.3	0.9
101316-62-5	309-867-2	309-867-2	Extract residues (coal), light oil alk., acid ext., indene fraction	309-867-2	#N/A	#N/A	#N/A	#N/A	#REF!	Classified CMR according to Annex VI of Regulation 1272/2008. (Might not apply when contaminants are below below legal thresholds and/or full refining history is known)	Carc. 1B Muta. 1B	H350 H340	#N/A	#N/A	#N/A	#N/A	#N/A	#N/A	#N/A		0	0	0	3	1	1	0	0	0	0	0	3														0.3	0.9
101316-66-9	309-870-9	309-870-9	Hydrocarbons, C6-8, hydrogenated sorption-dearomatized, toluene raffination	309-870-9	#N/A	#N/A	#N/A	#N/A	#REF!	Classified CMR according to Annex VI of Regulation 1272/2008. (Might not apply when contaminants are below below legal thresholds and/or full refining history is known)	Carc. 1B Muta. 1B Asp. Tox. 1	H350 H340 H304	#N/A	#N/A	#N/A	#N/A	#N/A	#N/A	#N/A		0	0	0	3	1	1	0	0	0	0	0	3														0.3	0.9
101316-67-0	309-871-4	309-871-4	Hydrocarbons, C6-rich, hydrotreated light naphtha distillates, solvent-refined	309-871-4	#N/A	#N/A	#N/A	#N/A	#REF!	Classified CMR according to Annex VI of Regulation 1272/2008. (Might not apply when contaminants are below below legal thresholds and/or full refining history is known)	Carc. 1B Muta. 1B Asp. Tox. 1	H350 H340 H304	#N/A	#N/A	#N/A	#N/A	#N/A	#N/A	#N/A		0	0	0	3	1	1	0	0	0	0	0	3														0.3	0.9
101316-69-2	309-874-0	309-874-0	Lubricating oils (petroleum), C>25, solvent-extd., deasphalted, dewaxed, hydrogenated	309-874-0	#N/A	#N/A	#N/A	#N/A	#REF!	Classified CMR according to Annex VI of Regulation 1272/2008. (Might not apply when contaminants are below below legal thresholds and/or full refining history is known)	Carc. 1B	H350	#N/A	#N/A	#N/A	#N/A	#N/A	#N/A	#N/A		0	0	0	3	1	0	0	0	0	0	0	3														0.3	0.9
101316-72-7	309-877-7	309-877-7	Lubricating oils (petroleum), C24-50, solvent-extd., dewaxed, hydrogenated	309-877-7	#N/A	#N/A	#N/A	#N/A	#REF!	Classified CMR according to Annex VI of Regulation 1272/2008. (Might not apply when contaminants are below below legal thresholds and/or full refining history is known)	Carc. 1B	H350	#N/A	#N/A	#N/A	#N/A	#N/A	#N/A	#N/A		0	0	0	3	1	0	0	0	0	0	0	3														0.3	0.9
101316-76-1	309-879-8	309-879-8	Naphtha (petroleum), hydrodesulfurized full-range coker	309-879-8	#N/A	#N/A	#N/A	#N/A	#REF!	Classified CMR according to Annex VI of Regulation 1272/2008. (Might not apply when contaminants are below below legal thresholds and/or full refining history is known)	Carc. 1B Muta. 1B Asp. Tox. 1	H350 H340 H304	#N/A	#N/A	#N/A	#N/A	#N/A	#N/A	#N/A		0	0	0	3	1	1	0	0	0	0	0	3														0.3	0.9
101316-84-1	309-886-6	309-886-6	Tar, brown-coal, low-temp.	309-886-6	#N/A	#N/A	#N/A	#N/A	#REF!	Classified CMR according to Annex VI of Regulation 1272/2008	Carc. 1A	H350	#N/A	#N/A	#N/A	#N/A	#N/A	#N/A	#N/A		0	0	0	3	1	0	0	0	0	0	0	3														0.3	0.9
101631-14-5	309-939-3	309-939-3	Distillates (petroleum), heavy steam-cracked	309-939-3	#N/A	#N/A	#N/A	#N/A	#REF!	Classified CMR according to Annex VI of Regulation 1272/2008	Carc. 1B	H350	#N/A	#N/A	#N/A	#N/A	#N/A	#N/A	#N/A		0	0	0	3	1	0	0	0	0	0	0	3														0.3	0.9
101795-01-1	309-976-5	309-976-5	Naphtha (petroleum), sweetened light	309-976-5	#N/A	#N/A	#N/A	#N/A	#REF!	Classified CMR according to Annex VI of Regulation 1272/2008. (Might not apply when contaminants are below below legal thresholds and/or full refining history is known)	Carc. 1B Muta. 1B Asp. Tox. 1	H350 H340 H304	#N/A	#N/A	#N/A	#N/A	#N/A	#N/A	#N/A		0	0	0	3	1	1	0	0	0	0	0	3														0.3	0.9
102110-14-5	310-012-0	310-012-0	Hydrocarbons, C3-6, C5-rich, steam-cracked naphtha	310-012-0	#N/A	#N/A	#N/A	#N/A	#REF!	Classified CMR according to Annex VI of Regulation 1272/2008. (Might not apply when contaminants are below below legal thresholds and/or full refining history is known)	Carc. 1B Muta. 1B Asp. Tox. 1	H350 H340 H304	#N/A	#N/A	#N/A	#N/A	#N/A	#N/A	#N/A		0	0	0	3	1	1	0	0	0	0	0	3														0.3	0.9
102110-15-6	310-013-6	310-013-6	Hydrocarbons, C5-rich, dicyclopentadiene-contg.	310-013-6	#N/A	#N/A	#N/A	#N/A	#REF!	Classified CMR according to Annex VI of Regulation 1272/2008. (Might not apply when contaminants are below below legal thresholds and/or full refining history is known)	Carc. 1B Muta. 1B Asp. Tox. 1	H350 H340 H304	#N/A	#N/A	#N/A	#N/A	#N/A	#N/A	#N/A		0	0	0	3	1	1	0	0	0	0	0	3														0.3	0.9
102110-55-4	310-057-6	310-057-6	Residues (petroleum), steam-cracked light, arom.	310-057-6	#N/A	#N/A	#N/A	#N/A	#REF!	Classified CMR according to Annex VI of Regulation 1272/2008. (Might not apply when contaminants are below below legal thresholds and/or full refining history is known)	Carc. 1B Muta. 1B Asp. Tox. 1	H350 H340 H304	#N/A	#N/A	#N/A	#N/A	#N/A	#N/A	#N/A		0	0	0	3	1	1	0	0	0	0	0	3														0.3	0.9
121575-60-8	310-162-7	310-162-7	Pitch, coal tar, high-temp., heat-treated	310-162-7	#N/A	#N/A	#N/A	#N/A	#REF!	Classified CMR according to Annex VI of Regulation 1272/2008. (Might not apply when contaminants are below below legal thresholds and/or full refining history is known)	Carc. 1B	H350	#N/A	#N/A	#N/A	#N/A	#N/A	#N/A	#N/A		0	0	0	3	1	0	0	0	0	0	0	3														0.3	0.9
57044-25-4	404-660-4	404-660-4	R-2,3-epoxy-1-propanol	404-660-4	#N/A	#N/A	#N/A	#N/A	#REF!	Classified CMR according to Annex VI of Regulation 1272/2008	Carc. 1B Muta. 2 Repr. 1B Acute Tox. 3 * Acute Tox. 4 * Acute Tox. 4 * Skin Corr. 1B	H242 H350 H341 H360F *** H331 H312 H302 H314	#N/A	#N/A	#N/A	#N/A	#N/A	#N/A	#N/A		0	0	0	3	1	1	1	0	0	0	0	3														0.3	0.9
EC-412-790-8	412-790-8	412-790-8	Vernetzer Tmag	412-790-8	#N/A	#N/A	#N/A	#N/A	#REF!	Classified CMR according to Annex VI of Regulation 1272/2008	Carc. 1B Muta. 2 STOT RE 2 *	H350 H341 H373 **	#N/A	#N/A	#N/A	#N/A	#N/A	#N/A	#N/A		0	0	0	3	1	1	0	0	0	0	0	3														0.3	0.9
164058-22-4	413-590-3	413-590-3	Trisodium [4'-(8-acetylamino-3,6-disulfonato-2-naphthylazo) -4''-(6-benzoylamino-3-sulfonato-2-naphthylazo)-biphenyl- 1,3',3'',1'''-tetraolato-O,O',O'',O''']copper(II)	413-590-3	#N/A	#N/A	#N/A	#N/A	#REF!	Classified CMR according to Annex VI of Regulation 1272/2008	Carc. 1B	H350	#N/A	#N/A	#N/A	#N/A	#N/A	#N/A	#N/A		0	0	0	3	1	0	0	0	0	0	0	3														0.3	0.9
EC-414-850-9	414-850-9	414-850-9	Hydrazine-tri-nitromethane	414-850-9	#N/A	#N/A	#N/A	#N/A	#REF!	Classified CMR according to Annex VI of Regulation 1272/2008	Expl. 1.1 **** Self-react. A Carc. 1B Acute Tox. 3 * Acute Tox. 3 * Skin Sens. 1	H201 H240 H350 H331 H301 H317	#N/A	#N/A	#N/A	#N/A	#N/A	#N/A	#N/A		0	0	0	3	1	0	0	0	0	0	0	3														0.3	0.9
183196-57-8	418-260-2	418-260-2	potassium 1-methyl-3-morpholinocarbonyl-4-[3-(1-methyl-3-morpholinocarbonyl-5-oxo-2-pyrazolin-4-ylidene)-1-propenyl]pyrazole-5-olate	418-260-2	#N/A	#N/A	#N/A	#N/A	#REF!	Classified CMR according to Annex VI of Regulation 1272/2008	Repr. 1B Skin Sens. 1	H360D*** H317	#N/A	#N/A	#N/A	#N/A	#N/A	#N/A	#N/A		0	0	0	3	0	0	1	0	0	0	0	3														0.3	0.9
59653-74-6	423-400-0	423-400-0	1,3,5-tris[(2S and 2R)-2,3-epoxypropyl]-1,3,5-triazine-2,4,6-(1H,3H,5H)-trione	423-400-0	#N/A	423-400-0	#N/A	#N/A	#REF!	Classified CMR according to Annex VI of Regulation 1272/2008	Muta. 1B Acute Tox. 3 * Acute Tox. 4 * STOT RE 2 * Eye Dam. 1 Skin Sens. 1	H340 H331 H302 H373 ** H318 H317	#N/A	H340 H331 H302 H373 ** H318 H317	Mutagenic (Article 57b)	#N/A	#N/A	#N/A	#N/A		0	0	0	3	0	1	0	0	0	0	0	3														1	3
51594-55-9	424-280-2	424-280-2	(R)-1-chloro-2,3-epoxypropane	424-280-2	#N/A	#N/A	#N/A	#N/A	#REF!	Classified CMR according to Annex VI of Regulation 1272/2008	Flam. Liq. 3 Carc. 1B Acute Tox. 3 * Acute Tox. 3 * Acute Tox. 3 * Skin Corr. 1B Skin Sens. 1	H226 H350 H331 H311 H301 H314 H317	#N/A	#N/A	#N/A	#N/A	#N/A	#N/A	#N/A		0	0	0	3	1	0	0	0	0	0	0	3														0.3	0.9
84245-12-5	424-550-1	424-550-1	N-[6,9-dihydro-9-[[2-hydroxy-1-(hydroxymethyl)ethoxy]methyl]-6-oxo-1H-purin-2-yl]acetamide	424-550-1	#N/A	#N/A	#N/A	#N/A	#REF!	Classified CMR according to Annex VI of Regulation 1272/2008	Carc. 1B Muta. 1B Repr. 1B	H350 H340 H360FD	#N/A	#N/A	#N/A	#N/A	#N/A	#N/A	#N/A		0	0	0	3	1	1	1	0	0	0	0	3														0.3	0.9
3724-43-4	425-970-6	425-970-6	chloro-N,N-dimethylformiminium chloride	425-970-6	#N/A	#N/A	#N/A	#N/A	#REF!	Classified CMR according to Annex VI of Regulation 1272/2008	Repr. 1B Acute Tox. 4 * Skin Corr. 1A	H360D*** H302 H314	#N/A	#N/A	#N/A	#N/A	#N/A	#N/A	#N/A		0	0	0	3	0	0	1	0	0	0	0	3														0.3	0.9
EC-435-960-3	435-960-3	435-960-3	diethyl (2-(hydroxymethylcarbamoyl)ethyl)phosphonate	435-960-3	#N/A	#N/A	#N/A	#N/A	#REF!	Classified CMR according to Annex VI of Regulation 1272/2008	Carc. 1B Muta. 1B Skin Sens. 1	H350 H340 H317	#N/A	#N/A	#N/A	#N/A	#N/A	#N/A	#N/A		0	0	0	3	1	1	0	0	0	0	0	3														0.3	0.9
142844-00-6	604-314-4	604-314-4	Aluminosilicate Refractory Ceramic Fibres	604-314-4	#N/A	#N/A	#N/A	#N/A	#REF!	Classified CMR according to Annex VI of Regulation 1272/2008	Carc. 1B	H350i	#N/A	#N/A	#N/A	#N/A	#N/A	#N/A	#N/A		0	0	0	3	1	0	0	0	0	0	0	3														0.3	0.9
142844-00-6_2	604-314-4	604-314-4	Zirconia Aluminosilicate Refractory Ceramic Fibres	604-314-4	#N/A	#N/A	#N/A	#N/A	#REF!	Classified CMR according to Annex VI of Regulation 1272/2008	Carc. 1B	H350i	#N/A	#N/A	#N/A	#N/A	#N/A	#N/A	#N/A		0	0	0	3	1	0	0	0	0	0	0	3														0.3	0.9
-	-	701-028-2	tris(4-nonylphenyl, branched) phosphite	#N/A	#N/A	701-028-2	#N/A	#N/A	#REF!	#N/A	#N/A	#N/A	#N/A	H317;_x000D_ H400;_x000D_ H410	Endocrine disrupting properties (Article 57(f) - environment)	#N/A	#N/A	#N/A	#N/A		0	0	1	0	0	0	0	1	1	0	0	3														1	3
97-63-2	202-597-5	202-597-5	Ethyl methacrylate	#N/A	#N/A	#N/A	#N/A	202-597-5	#REF!	#N/A	#N/A	#N/A	#N/A	#N/A	#N/A	#N/A	H225 H319 H335 H315 H317	Suspected CMR#Sensitiser#Consumer use#High (aggregated) tonnage#Wide dispersive use	#N/A		0	0	0	2.1	0	0	0	0	0	0.6	0	2.7														0.5	1.35
108-30-5	203-570-0	203-570-0	Succinic anhydride	#N/A	#N/A	#N/A	#N/A	203-570-0	#REF!	#N/A	#N/A	#N/A	#N/A	#N/A	#N/A	#N/A	H302 H335 H319	Suspected CMR#Sensitiser#High (aggregated) tonnage#High RCR	#N/A		0	0	0	2.1	0	0	0	0	0	0.6	0	2.7														0.5	1.35
868-77-9	212-782-2	212-782-2	2-hydroxyethyl methacrylate	#N/A	#N/A	#N/A	#N/A	212-782-2	#REF!	#N/A	#N/A	#N/A	#N/A	#N/A	#N/A	#N/A	H315 H319 H317	Suspected CMR#Sensitiser#Consumer use#High (aggregated) tonnage#High RCR#Wide dispersive use	#N/A		0	0	0	2.1	0	0	0	0	0	0.6	0	2.7														0.5	1.35
2386-87-0	219-207-4	219-207-4	7-oxabicyclo[4.1.0]hept-3-ylmethyl 7-oxabicyclo [4.1.0]heptane-3-carboxylate	#N/A	#N/A	#N/A	#N/A	219-207-4	#REF!	#N/A	#N/A	#N/A	#N/A	#N/A	#N/A	#N/A	#N/A	Suspected CMR#Sensitiser#Exposure of workers#High RCR	#N/A		0	0	0	2.1	0	0	0	0	0	0.6	0	2.7														0.5	1.35
25013-16-5	246-563-8	246-563-8	tert.-Butylhydroxyanisole (BHA); tert-butyl-4-methoxyphenol	246-563-8	#N/A	#N/A	#N/A	246-563-8	#REF!	BHA is associated with reproductive dysfunction, increased cancer risk, including breast and prostate, and a range of other chronic or irreversible health problems, often from very low levels of exposure. BHA is commonly detected in humans.	Official classification missing - 57f substance	#N/A	#N/A	#N/A	#N/A	#N/A	#N/A	Suspected Reprotoxic#Potential endocrine disruptor#Consumer use#Exposure of sensitive populations#Wide dispersive use	CAT1		0	0	0	0	0	0	0.7	1	1	0	0	2.7														0.5	1.35
27813-02-1	248-666-3	248-666-3	Methacrylic acid, monoester with propane-1,2-diol	#N/A	#N/A	#N/A	#N/A	248-666-3	#REF!	#N/A	#N/A	#N/A	#N/A	#N/A	#N/A	#N/A	#N/A	Suspected CMR#Sensitiser#Consumer use#High (aggregated) tonnage#High RCR#Wide dispersive use	#N/A		0	0	0	2.1	0	0	0	0	0	0.6	0	2.7														0.5	1.35
2691-41-0	-	220-260-0	-	#N/A	#N/A	#N/A	#N/A	220-260-0	#REF!	#N/A	#N/A	#N/A	#N/A	#N/A	#N/A	#N/A	H302; H311; H312; H332; H360; H412; H370	Suspected Carcinogenic#Suspected Reprotoxic#Exposure of environment#Exposure of workers#Wide dispersive use	#N/A		0	0	1	0	0.7	0	1	0	0	0	0	2.7														0.5	1.35
96-76-4	202-532-0	202-532-0	2,4-di-tert-butylphenol	#N/A	#N/A	#N/A	#N/A	202-532-0	#REF!	#N/A	#N/A	#N/A	#N/A	#N/A	#N/A	#N/A	#N/A	Suspected CMR#Potential endocrine disruptor#Consumer use#Wide dispersive use	#N/A		0	0	0	2.1	0	0	0	0	0.5	0	0	2.6														0.5	1.3
106-44-5	203-398-6	203-398-6	p-cresol	#N/A	#N/A	#N/A	#N/A	203-398-6	#REF!	#N/A	#N/A	#N/A	#N/A	#N/A	#N/A	#N/A	H311 H301 H314	Suspected CMR#Potential endocrine disruptor#Consumer use#High (aggregated) tonnage#Wide dispersive use	CAT2		0	0	0	2.1	0	0	0	0	0.5	0	0	2.6														0.5	1.3
1762-95-4	217-175-6	217-175-6	Ammonium thiocyanate	#N/A	#N/A	#N/A	#N/A	217-175-6	#REF!	#N/A	#N/A	#N/A	#N/A	#N/A	#N/A	#N/A	#N/A	Suspected CMR#Potential endocrine disruptor#High (aggregated) tonnage#High RCR#Wide dispersive use	#N/A		0	0	0	2.1	0	0	0	0	0.5	0	0	2.6														0.5	1.3
123-30-8	-	204-616-2	-	#N/A	#N/A	#N/A	#N/A	204-616-2	#REF!	#N/A	#N/A	#N/A	#N/A	#N/A	#N/A	#N/A	H302; H332; H411; H332;H341	Mutagenic#Sensitiser#Other hazard based concern	#N/A		0	0	1	0	0	1	0	0	0	0.6	0	2.6														0.5	1.3
2835-95-2	-	220-618-6	-	#N/A	#N/A	#N/A	#N/A	220-618-6	#REF!	#N/A	#N/A	#N/A	#N/A	#N/A	#N/A	#N/A	H302; H315; H317; H312; H332; H411; H335;H341	Mutagenic#Sensitiser#Other hazard based concern	#N/A		0	0	1	0	0	1	0	0	0	0.6	0	2.6														0.5	1.3
95-47-6	202-422-2	202-422-2	o-xylene	#N/A	#N/A	#N/A	#N/A	202-422-2	#REF!	#N/A	#N/A	#N/A	#N/A	#N/A	#N/A	#N/A	H226 H332 H312 H315	Suspected CMR#Suspected Sensitiser#Consumer use#Cumulative exposure#High (aggregated) tonnage#High RCR#Wide dispersive use	#N/A		0	0	0	2.1	0	0	0	0	0	0.4	0	2.5														0.5	1.25
98-54-4	202-679-0	202-679-0	4-Tert-Butylphenol	202-679-0	#N/A	202-679-0	#N/A	202-679-0	#REF!	4-tert-butylphenol acts as an endocrine disruptor and has been reported as toxic to reproduction. It has been widely found in the environment.	Repr. 2 Skin Irrit. 2 Eye Dam. 1	H361f H315 H318	#N/A	H361f H315 H318	Endocrine disrupting properties (Article 57(f) - environment)	#N/A	H361f H315 H318	Potential endocrine disruptor#High (aggregated) tonnage	CAT2		0	0	0	0	0	0	1	1	0.5	0	0	2.5														1	2.5
102-71-6	203-049-8	203-049-8	2,2',2''-nitrilotriethanol	#N/A	#N/A	#N/A	#N/A	203-049-8	#REF!	#N/A	#N/A	#N/A	#N/A	#N/A	#N/A	#N/A	#N/A	Suspected CMR#Suspected Sensitiser#Other hazard based concern#Consumer use#Exposure of workers#High (aggregated) tonnage#Wide dispersive use	#N/A		0	0	0	2.1	0	0	0	0	0	0.4	0	2.5														0.5	1.25
106-42-3	203-396-5	203-396-5	p-xylene	#N/A	#N/A	#N/A	#N/A	203-396-5	#REF!	#N/A	#N/A	#N/A	#N/A	#N/A	#N/A	#N/A	H226 H332 H312 H315	Suspected CMR#Suspected Sensitiser#Consumer use#Cumulative exposure#High (aggregated) tonnage#High RCR#Wide dispersive use	#N/A		0	0	0	2.1	0	0	0	0	0	0.4	0	2.5														0.5	1.25
108-38-3	203-576-3	203-576-3	m-xylene	#N/A	#N/A	#N/A	#N/A	203-576-3	#REF!	#N/A	#N/A	#N/A	#N/A	#N/A	#N/A	#N/A	H226 H332 H312 H315	Suspected CMR#Suspected Sensitiser#Consumer use#Cumulative exposure#High (aggregated) tonnage#High RCR#Wide dispersive use	#N/A		0	0	0	2.1	0	0	0	0	0	0.4	0	2.5														0.5	1.25
110-97-4	203-820-9	203-820-9	1,1'-iminodipropan-2-ol	#N/A	#N/A	#N/A	#N/A	203-820-9	#REF!	#N/A	#N/A	#N/A	#N/A	#N/A	#N/A	#N/A	H319	Suspected CMR#Suspected Sensitiser#Consumer use#Exposure of workers#High RCR#Wide dispersive use	#N/A		0	0	0	2.1	0	0	0	0	0	0.4	0	2.5														0.5	1.25
111-46-6	203-872-2	203-872-2	2,2'-oxydiethanol	#N/A	#N/A	#N/A	#N/A	203-872-2	#REF!	#N/A	#N/A	#N/A	#N/A	#N/A	#N/A	#N/A	H302	Suspected CMR#Other hazard based concern#Consumer use#High (aggregated) tonnage#Wide dispersive use	#N/A		0	0	0	2.1	0	0	0	0	0	0.4	0	2.5														0.5	1.25
288-88-0	206-022-9	206-022-9	1,2,4-triazole	206-022-9	#N/A	#N/A	#N/A	206-022-9	#REF!	This substance is Persistent, Mobile and Toxic. It is frequently detected in ground water samples.	Acute Tox. 4_x000D_ Skin Irrit. 2 _x000D_ Eye Irrit. 2 _x000D_ Acute Tox. 3 _x000D_ Carc. 2 _x000D_ STOT RE 1 _x000D_ Acute Tox. 4_x000D_ Eye Irrit. 2_x000D_ Repr. 2	H302 _x000D_ H319 _x000D_ H361	#N/A	#N/A	#N/A	#N/A	H361d *** H302 H319	Suspected CMR#Other hazard based concern#Exposure of environment#High (aggregated) tonnage#Other exposure/risk based concern#Wide dispersive use	#N/A		0	0	0	2.1	0	0	1	0	0	0.4	0	2.5														0.5	1.25
330-54-1	206-354-4	206-354-4	Diuron	#N/A	#N/A	#N/A	#N/A	206-354-4	#REF!	#N/A	#N/A	#N/A	#N/A	#N/A	#N/A	#N/A	H351 H302 H373 ** H400 H410	Potential endocrine disruptor#Other exposure/risk based concern#Wide dispersive use	CAT2		0	0	1	0	1	0	0	0	0.5	0	0	2.5														0.5	1.25
1330-20-7	215-535-7	215-535-7	Xylene	#N/A	#N/A	#N/A	#N/A	215-535-7	#REF!	#N/A	#N/A	#N/A	#N/A	#N/A	#N/A	#N/A	H226 H332 H312 H315	Suspected CMR#Suspected Sensitiser#Consumer use#Cumulative exposure#High (aggregated) tonnage#High RCR#Wide dispersive use	#N/A		0	0	0	2.1	0	0	0	0	0	0.4	0	2.5														0.5	1.25
26761-45-5	247-979-2	247-979-2	2,3-epoxypropyl neodecanoate	#N/A	#N/A	#N/A	#N/A	247-979-2	#REF!	#N/A	#N/A	#N/A	#N/A	#N/A	#N/A	#N/A	#N/A	Suspected CMR#Suspected Sensitiser#Consumer use#Exposure of workers#High (aggregated) tonnage#Wide dispersive use	#N/A		0	0	0	2.1	0	0	0	0	0	0.4	0	2.5														0.5	1.25
28553-12-0	249-079-5	249-079-5	Diisononyl phthalate	249-079-5	249-079-5	#N/A	#N/A	#N/A	#REF!	For DINP reprotoxic effects and effects on development have been reported and it is a suspected endocrine disruptor. It has been detected in the environment and humans.	Official classification missing - 57f substance	#N/A	#N/A	#N/A	#N/A	#N/A	#N/A	#N/A	CAT2		0	0	0	0	0	0	1	1	0.5	0	0	2.5														1	2.5
60-29-7, 100-41-4	200-467-2	200-467-2	Diethyl ether	#N/A	#N/A	#N/A	#N/A	200-467-2	#REF!	#N/A	#N/A	#N/A	#N/A	#N/A	#N/A	#N/A	H224 H302 H336	Suspected Carcinogenic#Suspected Mutagenic#Suspected Reprotoxic#Other hazard based concern#Consumer use#Exposure of environment#High (aggregated) tonnage#Wide dispersive use	#N/A		0	0	0	0	0.7	0.7	0.7	0	0	0.4	0	2.5														0.5	1.25
103-23-1	203-090-1	203-090-1	Bis(2-ethylhexyl) adipate	#N/A	#N/A	#N/A	#N/A	203-090-1	#REF!	#N/A	#N/A	#N/A	#N/A	#N/A	#N/A	#N/A	#N/A	Suspected CMR#Consumer use#High (aggregated) tonnage#Wide dispersive use	CAT3b		0	0	0	2.1	0	0	0	0	0.3	0	0	2.4														0.5	1.2
108-05-4	203-545-4	203-545-4	Vinyl acetate	#N/A	#N/A	#N/A	#N/A	203-545-4	#REF!	#N/A	#N/A	#N/A	#N/A	#N/A	#N/A	#N/A	H225 H351 H332 H335	Suspected Reprotoxic#Potential endocrine disruptor#Suspected Sensitiser#Consumer use#High (aggregated) tonnage#Wide dispersive use	CAT3b		0	0	0	0	1	0	0.7	0	0.3	0.4	0	2.4														0.5	1.2
68479-98-1	270-877-4	270-877-4	Diethylmethylbenzenediamine	#N/A	#N/A	#N/A	#N/A	270-877-4	#REF!	#N/A	#N/A	#N/A	#N/A	#N/A	#N/A	#N/A	H312 H302 H373 ** H319 H400 H410	Suspected Mutagenic#Suspected Reprotoxic	#N/A		0	0	1	0	0	0.7	0.7	0	0	0	0	2.4														0.5	1.2
68412-54-4	500-209-1	500-209-1	Nonylphenol, branched, ethoxylated	500-209-1	500-209-1	#N/A	500-209-1	500-209-1	#REF!	Nonylphenol etoxilates are categorized as endocrine disruptors (cat 1), they are the precursors of Nonyl phenol which is a persistent and bio-accumulative substance. It has been found in the environment.	Official classification missing - 57f substance	#N/A	#N/A	#N/A	Endocrine disrupting properties (Article 57(f) - environment)	#N/A	#N/A	Potential endocrine disruptor#Other hazard based concern#High (aggregated) tonnage	#N/A		0	0	0	0	0	0	0	1	1	0.4	0	2.4														1	2.4
121-82-4	-	204-500-1	-	#N/A	#N/A	#N/A	#N/A	204-500-1	#REF!	#N/A	#N/A	#N/A	#N/A	#N/A	#N/A	#N/A	H301; H315; H319; H311; H331; H335;H341; H370; H373;	Suspected Carcinogenic#Suspected Reprotoxic#Exposure of environment#Exposure of workers#Wide dispersive use	#N/A		0	0	0	0	0.7	1	0.7	0	0	0	0	2.4														0.5	1.2
105-55-5	-	203-308-5	-	#N/A	#N/A	#N/A	#N/A	203-308-5	#REF!	#N/A	#N/A	#N/A	#N/A	#N/A	#N/A	#N/A	H412; H302; H317; H318; H351; H372; H315	Suspected Carcinogenic#Suspected Sensitiser#Consumer use#Exposure of environment#Exposure of workers#Wide dispersive use	#N/A		0	0	1	0	1	0	0	0	0	0.4	0	2.4														0.5	1.2
232938-43-1	-	432-520-2	-	#N/A	#N/A	#N/A	#N/A	432-520-2	#REF!	#N/A	#N/A	#N/A	#N/A	#N/A	#N/A	#N/A	H411	Suspected Reprotoxic#Potential endocrine disruptor	#N/A		0	0	1	0	0	0	0.7	0	0.5	0	0	2.2														0.5	1.1
67-56-1	200-659-6	200-659-6	Methanol	#N/A	#N/A	#N/A	#N/A	200-659-6	#REF!	#N/A	#N/A	#N/A	#N/A	#N/A	#N/A	#N/A	H225 H331 H311 H301 H370 **	Suspected CMR#Consumer use#Exposure of environment#Exposure of workers#Wide dispersive use	#N/A		0	0	0	2.1	0	0	0	0	0	0	0	2.1														0.5	1.05
75-65-0	200-889-7	200-889-7	2-methylpropan-2-ol	#N/A	#N/A	#N/A	#N/A	200-889-7	#REF!	#N/A	#N/A	#N/A	#N/A	#N/A	#N/A	#N/A	H225 H332 H335 H319	Suspected CMR#Consumer use#High (aggregated) tonnage#High RCR#Wide dispersive use	#N/A		0	0	0	2.1	0	0	0	0	0	0	0	2.1														0.5	1.05
103-09-3	203-079-1	203-079-1	2-ethylhexyl acetate	#N/A	#N/A	#N/A	#N/A	203-079-1	#REF!	#N/A	#N/A	#N/A	#N/A	#N/A	#N/A	#N/A	#N/A	Suspected CMR#Consumer use#Wide dispersive use	#N/A		0	0	0	2.1	0	0	0	0	0	0	0	2.1														0.5	1.05
104-76-7	203-234-3	203-234-3	2-ethylhexan-1-ol	#N/A	#N/A	#N/A	#N/A	203-234-3	#REF!	#N/A	#N/A	#N/A	#N/A	#N/A	#N/A	#N/A	#N/A	Suspected CMR#Consumer use#High (aggregated) tonnage#High RCR#Wide dispersive use	#N/A		0	0	0	2.1	0	0	0	0	0	0	0	2.1														0.5	1.05
105-59-9	203-312-7	203-312-7	2,2'-methyliminodiethanol	#N/A	#N/A	#N/A	#N/A	203-312-7	#REF!	#N/A	#N/A	#N/A	#N/A	#N/A	#N/A	#N/A	H319	Suspected CMR#High (aggregated) tonnage#High RCR#Wide dispersive use	#N/A		0	0	0	2.1	0	0	0	0	0	0	0	2.1														0.5	1.05
107-46-0	203-492-7	203-492-7	Hexamethyldisiloxane	#N/A	#N/A	#N/A	#N/A	203-492-7	#REF!	#N/A	#N/A	#N/A	#N/A	#N/A	#N/A	#N/A	#N/A	Consumer use#High (aggregated) tonnage#Suspected CMR	#N/A		0	0	0	2.1	0	0	0	0	0	0	0	2.1														0.5	1.05
111-42-2	203-868-0	203-868-0	2,2'-Iminodiethanol	#N/A	#N/A	#N/A	#N/A	203-868-0	#REF!	#N/A	#N/A	#N/A	#N/A	#N/A	#N/A	#N/A	H302 H373 ** H315 H318	Suspected CMR#High (aggregated) tonnage#Wide dispersive use	#N/A		0	0	0	2.1	0	0	0	0	0	0	0	2.1														0.5	1.05
116-15-4	204-127-4	204-127-4	Hexafluoropropene	#N/A	#N/A	#N/A	#N/A	204-127-4	#REF!	#N/A	#N/A	#N/A	#N/A	#N/A	#N/A	#N/A	H332 H335	Suspected CMR#High (aggregated) tonnage	#N/A		0	0	0	2.1	0	0	0	0	0	0	0	2.1														0.5	1.05
119-36-8	204-317-7	204-317-7	Methyl salicylate	#N/A	#N/A	#N/A	#N/A	204-317-7	#REF!	#N/A	#N/A	#N/A	#N/A	#N/A	#N/A	#N/A	#N/A	Suspected CMR#Consumer use#High (aggregated) tonnage	#N/A		0	0	0	2.1	0	0	0	0	0	0	0	2.1														0.5	1.05
141-32-2	205-480-7	205-480-7	Butyl acrylate	#N/A	#N/A	#N/A	#N/A	205-480-7	#REF!	#N/A	#N/A	#N/A	#N/A	#N/A	#N/A	#N/A	H226 H335 H315 H319 H317	Suspected CMR#High (aggregated) tonnage#Other exposure/risk based concern	#N/A		0	0	0	2.1	0	0	0	0	0	0	0	2.1														0.5	1.05
6259-76-3	228-408-6	228-408-6	Hexyl salicylate	#N/A	#N/A	#N/A	#N/A	228-408-6	#REF!	#N/A	#N/A	#N/A	#N/A	#N/A	#N/A	#N/A	#N/A	Suspected CMR#Consumer use#High (aggregated) tonnage#High RCR#Wide dispersive use	#N/A		0	0	0	2.1	0	0	0	0	0	0	0	2.1														0.5	1.05
38083-17-9	253-775-4	253-775-4	Climbazole	#N/A	#N/A	#N/A	#N/A	253-775-4	#REF!	#N/A	#N/A	#N/A	#N/A	#N/A	#N/A	#N/A	#N/A	Suspected CMR#Consumer use#Wide dispersive use	#N/A		0	0	0	2.1	0	0	0	0	0	0	0	2.1														0.5	1.05
68515-40-2	271-082-5	271-082-5	1,2-Benzenedicarboxylic acid, benzyl C7-9-branched and linear alkyl esters	#N/A	#N/A	#N/A	#N/A	271-082-5	#REF!	#N/A	#N/A	#N/A	#N/A	#N/A	#N/A	#N/A	#N/A	Suspected CMR#High (aggregated) tonnage#Other exposure/risk based concern	#N/A		0	0	0	2.1	0	0	0	0	0	0	0	2.1														0.5	1.05
68515-43-5	271-085-1	271-085-1	1,2-benzenedicarboxylic acid, di-C9-11-branched and linear alkyl esters	#N/A	#N/A	#N/A	#N/A	271-085-1	#REF!	#N/A	#N/A	#N/A	#N/A	#N/A	#N/A	#N/A	#N/A	Suspected CMR#High (aggregated) tonnage#Other exposure/risk based concern	#N/A		0	0	0	2.1	0	0	0	0	0	0	0	2.1														0.5	1.05
68515-47-9	271-089-3	271-089-3	1,2-benzenedicarboxylic acid, di-C11-14-branched alkyl es-ters, C13-rich	#N/A	#N/A	#N/A	#N/A	271-089-3	#REF!	#N/A	#N/A	#N/A	#N/A	#N/A	#N/A	#N/A	#N/A	High (aggregated) tonnage#Other exposure/risk based concern#Suspected CMR	#N/A		0	0	0	2.1	0	0	0	0	0	0	0	2.1														0.5	1.05
85507-79-5	287-401-6	287-401-6	Diundecyl phthalate, branched and linear	#N/A	#N/A	#N/A	#N/A	287-401-6	#REF!	#N/A	#N/A	#N/A	#N/A	#N/A	#N/A	#N/A	#N/A	Suspected CMR#High (aggregated) tonnage#Other exposure/risk based concern	#N/A		0	0	0	2.1	0	0	0	0	0	0	0	2.1														0.5	1.05
-	700-989-5	700-989-5	1,2-benzenedicarboxylic acid, di-C10-12-branched alkyl esters	#N/A	#N/A	#N/A	#N/A	700-989-5	#REF!	#N/A	#N/A	#N/A	#N/A	#N/A	#N/A	#N/A	#N/A	Suspected CMR#High (aggregated) tonnage#Other exposure/risk based concern	#N/A		0	0	0	2.1	0	0	0	0	0	0	0	2.1														0.5	1.05
108-94-1	203-631-1	203-631-1	Cyclohexanone	#N/A	#N/A	#N/A	#N/A	203-631-1	#REF!	#N/A	#N/A	#N/A	#N/A	#N/A	#N/A	#N/A	H226 H332	Suspected Carcinogenic#Suspected Mutagenic#Suspected Reprotoxic#Exposure of workers#High (aggregated) tonnage#Wide dispersive use	#N/A		0	0	0	0	0.7	0.7	0.7	0	0	0	0	2.1														0.5	1.05
149-44-0	205-739-4	205-739-4	Sodium hydroxymethanesulphinate	#N/A	#N/A	#N/A	#N/A	205-739-4	#REF!	#N/A	#N/A	#N/A	#N/A	#N/A	#N/A	#N/A	#N/A	Suspected Carcinogenic#Suspected Mutagenic#Suspected Reprotoxic#Exposure of workers#High (aggregated) tonnage#Wide dispersive use	#N/A		0	0	0	0	0.7	0.7	0.7	0	0	0	0	2.1														0.5	1.05
-	-	-	Tris(4-nonylphenyl, branched and linear) phosphite (TNPP) with ≥ 0.1% w/w of 4-nonylphenol, branched and linear (4-NP)	#N/A	#N/A	Tris(4-nonylphenyl, branched and linear) phosphite (TNPP) with ≥ 0.1% w/w of 4-nonylphenol, branched and linear (4-NP)	#N/A	#N/A	#N/A	#N/A	#N/A	#N/A	#N/A	#N/A	Endocrine disrupting properties (Article 57(f) - environment)	#N/A	#N/A	#N/A	#N/A		0	0	0	0	0	0	0	1	1	0	0	2														1	2
-	-	-	4-(1,1,3,3-tetramethylbutyl)phenol, ethoxylated	#N/A	#N/A	4-(1,1,3,3-tetramethylbutyl)phenol, ethoxylated	4-(1,1,3,3-tetramethylbutyl)phenol, ethoxylated	#N/A	#N/A	#N/A	#N/A	#N/A	#N/A	#N/A	Endocrine disrupting properties (Article 57(f) - environment)	#N/A	#N/A	#N/A	#N/A		0	0	0	0	0	0	0	1	1	0	0	2														1	2
-	-	-	4-Nonylphenol, branched and linear, ethoxylated	#N/A	#N/A	4-Nonylphenol, branched and linear, ethoxylated	4-Nonylphenol, branched and linear, ethoxylated	#N/A	#N/A	#N/A	#N/A	#N/A	#N/A	#N/A	Endocrine disrupting properties (Article 57(f) - environment)	#N/A	#N/A	#N/A	#N/A		0	0	0	0	0	0	0	1	1	0	0	2														1	2
2315-61-9	-	-	Ethanol, 2-[2- [4-(1,1,3,3-tetramethylbutyl)phenoxy]et hoxy]-	2315-61-9	#N/A	#N/A	2315-61-9	#N/A	#N/A	Substance is concluded to be an endocrine disruptor SVHC by ECHA Member State Committee.	Official classification missing - 57f substance	#N/A	#N/A	#N/A	Endocrine disrupting properties (Article 57(f) - environment)	#N/A	#N/A	#N/A	#N/A		0	0	0	0	0	0	0	1	1	0	0	2														1	2
2315-67-5	-	-	Ethanol, 2-[4- (1,1,3,3-tetramethylbutyl)phenoxy]-	2315-67-5	#N/A	#N/A	2315-67-5	#N/A	#N/A	Substance is concluded to be an endocrine disruptor SVHC by ECHA Member State Committee.	Official classification missing - 57f substance	#N/A	#N/A	#N/A	Endocrine disrupting properties (Article 57(f) - environment)	#N/A	#N/A	#N/A	#N/A		0	0	0	0	0	0	0	1	1	0	0	2														1	2
68987-90-6	-	-	Poly(oxy-1,2-ethanediyl), alpha-(octylphenyl)-omega-hydroxy-branched	68987-90-6	#N/A	#N/A	#N/A	#N/A	#N/A	Octylphenolethoxylates are reported to have endocrine disrupting properties. They are the precursors of Octylphenol which is a persistent substance. It has been found in the environment.	Official classification missing - 57f substance	#N/A	#N/A	#N/A	#N/A	#N/A	#N/A	#N/A	#N/A		0	0	0	0	0	0	0	1	1	0	0	2														0.3	0.6
62-53-3	200-539-3	200-539-3	Aniline	200-539-3	#N/A	#N/A	#N/A	#N/A	#REF!	Aniline is classified as a possible carcinogen (C3) and as a possible mutagenic substance (M3). Aniline is very toxic and has been found in both humans and environmental samples.	Carc. 2 Muta. 2 Acute Tox. 3 * Acute Tox. 3 * Acute Tox. 3 * STOT RE 1 Eye Dam. 1 Skin Sens. 1 Aquatic Acute 1	H351 H341 H331 H311 H301 H372 ** H318 H317 H400	#N/A	#N/A	#N/A	#N/A	#N/A	#N/A	#N/A		0	0	0	0	1	1	0	0	0	0	0	2														0.3	0.6
67-66-3	200-663-8	200-663-8	Chloroform	200-663-8	200-663-8	#N/A	#N/A	#N/A	#REF!	This substance is very Persistent, very Mobile and Toxic. It has been found in natural waters and drinking waters.	Acute Tox. 4_x000D_ Skin Irrit. 2 _x000D_ Eye Irrit. 2 _x000D_ Acute Tox. 3 _x000D_ Carc. 2 _x000D_ STOT RE 1 _x000D_ Repr. 2	H305 _x000D_ H315_x000D_ H319_x000D_ H331_x000D_ H351_x000D_ H372_x000D_ H361d	H351 H361d H331 H302 H372 H315 H319	#N/A	#N/A	#N/A	#N/A	#N/A	#N/A		0	0	0	0	1	0	1	0	0	0	0	2														1	2
76-01-7	200-925-1	200-925-1	Pentachloroethane	#N/A	200-925-1	#N/A	#N/A	#N/A	#REF!	#N/A	#N/A	#N/A	H351 H372 ** H411	#N/A	#N/A	#N/A	#N/A	#N/A	#N/A		0	0	1	0	1	0	0	0	0	0	0	2														1	2
80-46-6	201-280-9	201-280-9	p-(1,1-dimethylpropyl)phenol	#N/A	#N/A	201-280-9	#N/A	201-280-9	#REF!	#N/A	#N/A	#N/A	#N/A	#N/A	Endocrine disrupting properties (Article 57(f) - environment)	#N/A	#N/A	Potential endocrine disruptor#Consumer use#Wide dispersive use	#N/A		0	0	0	0	0	0	0	1	1	0	0	2														1	2
94-13-3	202-307-7	202-307-7	Propylparaben; propyl 4-hydroxybenzoate	202-307-7	#N/A	#N/A	#N/A	#N/A	#REF!	Propylparaben is an endocrine disruptor with estrogenic and antiandrogen activity, affecting sperm function and prenatal development among others. The substance has been detected in biomonitoring studies and human urine and milk. It is categorized as an e	Official classification missing - 57f substance	#N/A	#N/A	#N/A	#N/A	#N/A	#N/A	#N/A	CAT1		0	0	0	0	0	0	0	1	1	0	0	2														0.3	0.6
94-26-8	202-318-7	202-318-7	Butylparaben; butyl 4-hydroxybenzoate	202-318-7	#N/A	202-318-7	#N/A	#N/A	#REF!	Butylparaben is an endocrine disruptor with estrogenic and antiandrogen activity, affecting sperm function and reproductive organs among others. The substance has been detected in human urine and indoor air. It is categorized as an endocrine disruptor in	Official classification missing - 57f substance	#N/A	#N/A	#N/A	Endocrine disrupting properties (Article 57(f) - human health)	#N/A	#N/A	#N/A	CAT1		0	0	0	0	0	0	0	1	1	0	0	2														1	2
100-42-5	202-851-5	202-851-5	Styrene	202-851-5	#N/A	#N/A	#N/A	#N/A	#REF!	Styrene is an endocrine disruptor (cat 1). Reprotoxic as well as carcinogenic and mutagenic effects have been reported. It is highly toxic to aquatic species.	Flam. Liq. 3 Repr. 2 Acute Tox. 4 * STOT RE 1 Skin Irrit. 2 Eye Irrit. 2	H226 H361d H332 H372 (hearing organs) H315 H319	#N/A	#N/A	#N/A	#N/A	#N/A	#N/A	CAT1		0	0	0	0	0	0	1	0	1	0	0	2														0.3	0.6
104-40-5	203-199-4	203-199-4	p-nonylphenol	203-199-4	#N/A	#N/A	#N/A	#N/A	#REF!	Nonylphenol is an endocrine disruptor (cat 1) and is classified as possibly toxic for reproduction (R3), It is also persistent and bio-accumulative and it has been found in humans and the environment.	Official classification missing - 57f substance	#N/A	#N/A	#N/A	#N/A	#N/A	#N/A	#N/A	CAT1		0	0	0	0	0	0	0	1	1	0	0	2														0.3	0.6
106-46-7	203-400-5	203-400-5	1,4-Dichlorobenzene	#N/A	203-400-5	#N/A	#N/A	#N/A	#REF!	#N/A	#N/A	#N/A	H351 H319 H400 H410	#N/A	#N/A	#N/A	#N/A	#N/A	#N/A		0	0	1	0	1	0	0	0	0	0	0	2														1	2
131-52-2	205-025-2	205-025-2	Sodium pentachlorophenolate	#N/A	205-025-2	#N/A	#N/A	#N/A	#REF!	#N/A	#N/A	#N/A	H351 H330 H311 H301 H335 H315 H319 H400 H410	#N/A	#N/A	#N/A	#N/A	#N/A	#N/A		0	0	1	0	1	0	0	0	0	0	0	2														1	2
131-55-5	205-028-9	205-028-9	Benzophenone-2 (Bp-2); 2,2',4,4'-tetrahydroxybenzophenone	205-028-9	#N/A	#N/A	#N/A	#N/A	#REF!	Benzophenone-2 (BP-2 is an endocrine disruptor with estrogenic, thyroid and antiandrogen activity, affecting several body functions and target organs including development of reproductive organs. It is categorized as an endocrine disruptor in the EU Commi	Official classification missing - 57f substance	#N/A	#N/A	#N/A	#N/A	#N/A	#N/A	#N/A	CAT1		0	0	0	0	0	0	0	1	1	0	0	2														0.3	0.6
131-56-6	205-029-4	205-029-4	2,4-Dihydroxybenzophenon; Resbenzophenone	205-029-4	#N/A	#N/A	#N/A	#N/A	#REF!	Benzophenone-1 (BP-1) is an endocrine disruptor with antiandrogen and estrogenic activity affecting reproductive organs. The substance has been found in biomonitoring studies and in indoor dust. It is categorized as an endocrine disruptor in the EU Commis	Official classification missing - 57f substance	#N/A	#N/A	#N/A	#N/A	#N/A	#N/A	#N/A	CAT1		0	0	0	0	0	0	0	1	1	0	0	2														0.3	0.6
137-26-8	205-286-2	205-286-2	Thiram	#N/A	#N/A	#N/A	#N/A	205-286-2	#REF!	#N/A	#N/A	#N/A	#N/A	#N/A	#N/A	#N/A	H332 H302 H373 ** H315 H319 H317 H400 H410	Potential endocrine disruptor#High (aggregated) tonnage#Wide dispersive use	CAT1		0	0	1	0	0	0	0	0	1	0	0	2														0.5	1
137-42-8	205-293-0	205-293-0	Metam-sodium	205-293-0	#N/A	#N/A	#N/A	#N/A	#REF!	Metam Sodium is an endocrine disruptor affecting several body functions and target organs including reproduction and development as well as immune function and the peripheral nervous system. The substance has been found in biomonitoring studies. It is cat	Acute Tox. 4 * Skin Corr. 1B Skin Sens. 1 Aquatic Acute 1 Aquatic Chronic 1	H302 H314 H317 H400 H410	#N/A	#N/A	#N/A	#N/A	#N/A	#N/A	CAT1		0	0	1	0	0	0	0	0	1	0	0	2														0.3	0.6
611-99-4	210-288-1	210-288-1	4,4'-dihydroxybenzophenone	210-288-1	#N/A	#N/A	#N/A	#N/A	#REF!	4,4´-dihydroxybenzophenone is an endocrine disrupter with estrogenic and antiandrogen activity, affecting reproduction and reproductive organs. It is categorized as an endocrine disruptor in the EU Commission EDC database.	Official classification missing - 57f substance	#N/A	#N/A	#N/A	#N/A	#N/A	#N/A	#N/A	CAT1		0	0	0	0	0	0	0	1	1	0	0	2														0.3	0.6
2210-79-9	218-645-3	218-645-3	2,3-epoxypropyl o-tolyl ether	#N/A	#N/A	#N/A	#N/A	218-645-3	#REF!	#N/A	#N/A	#N/A	#N/A	#N/A	#N/A	#N/A	H341 H315 H317 H411	Mutagenic	#N/A		0	0	1	0	0	1	0	0	0	0	0	2														0.5	1
2497-59-8	219-682-8	219-682-8	20-[4-(1,1,3,3-tetramethylbutyl)phenoxy]-3,6,9,12,15,18-hexaoxaicosan-1-ol	219-682-8	#N/A	#N/A	219-682-8	#N/A	#REF!	Substance is concluded to be an endocrine disruptor SVHC by ECHA Member State Committee.	Official classification missing - 57f substance	#N/A	#N/A	#N/A	Endocrine disrupting properties (Article 57(f) - environment)	#N/A	#N/A	#N/A	#N/A		0	0	0	0	0	0	0	1	1	0	0	2														1	2
3648-20-2	222-884-9	222-884-9	Diundecyl phtalate, DuDP, branched and linear	222-884-9	#N/A	#N/A	#N/A	#N/A	#REF!	This substance has endocrine disrupting properties. In vivo studies in rodents have shown disruption of male sex organs, decreased sperm quality and decreased ano-genital distance, which is a marker of anti-androgenicity during development.	Official classification missing - 57f substance	#N/A	#N/A	#N/A	#N/A	#N/A	#N/A	#N/A	#N/A		0	0	0	0	0	0	0	1	1	0	0	2														0.3	0.6
4151-50-2	223-980-3	223-980-3	Sulfluramid (PFOSA)	223-980-3	#N/A	#N/A	#N/A	#N/A	#REF!	For PFOSA reprotoxic effects have been reported. It is a precursor of the vPvBT chemical PFOS and has been found in biomonitoring studies.	Official classification missing - 57f substance	#N/A	#N/A	#N/A	#N/A	#N/A	#N/A	#N/A	#N/A		0	0	0	0	0	0	1	1	0	0	0	2														0.3	0.6
7311-27-5	230-770-5	230-770-5	2-[2-[2-[2-(4-nonylphenoxy)ethoxy]ethoxy]ethoxy]ethanol	230-770-5	#N/A	#N/A	230-770-5	#N/A	#REF!	Nonylphenol etoxilates are categorized as endocrine disruptors (cat 1), they are the precursors of Nonyl phenol which is a persistent and bio-accumulative substance. It has been found in the environment.	Official classification missing - 57f substance	#N/A	#N/A	#N/A	Endocrine disrupting properties (Article 57(f) - environment)	#N/A	#N/A	#N/A	#N/A		0	0	0	0	0	0	0	1	1	0	0	2														1	2
7778-73-6	231-911-3	231-911-3	Potassium pentachlorophenolate	#N/A	231-911-3	#N/A	#N/A	#N/A	#REF!	#N/A	#N/A	#N/A	H351 H330 H311 H301 H335 H315 H319 H400 H410	#N/A	#N/A	#N/A	#N/A	#N/A	#N/A		0	0	1	0	1	0	0	0	0	0	0	2														1	2
15087-24-8	239-139-9	239-139-9	3-Benzylidene camphor (3-BC); 1,7,7-trimethyl-3-(phenylmethylene)bicyclo[2.2.1]heptan-2-one	239-139-9	#N/A	239-139-9	#N/A	#N/A	#REF!	3-benzylidene camphor (3-BC) is an endocrine disruptor with estrogenic, antiandrogen and progesterone activity, affecting several body functions and target organs including reproduction, development, immune function and behaviour. It is categorized as an	Official classification missing - 57f substance	#N/A	#N/A	#N/A	Endocrine disrupting properties (Article 57(f) - environment)	#N/A	#N/A	#N/A	CAT1		0	0	0	0	0	0	0	1	1	0	0	2														1	2
26571-11-9	-	247-816-5	26-(nonylphenoxy)-3,6,9,12,15,18,21,24-octaoxahexacosan-1-ol	#N/A	#N/A	#N/A	247-816-5	#N/A	#REF!	#N/A	#N/A	#N/A	#N/A	#N/A	Endocrine disrupting properties (Article 57(f) - environment)	#N/A	#N/A	#N/A	#N/A		0	0	0	0	0	0	0	1	1	0	0	2														1	2
27193-28-8	248-310-7	248-310-7	(1,1,3,3-tetramethylbutyl)phenol	248-310-7	#N/A	#N/A	#N/A	#N/A	#REF!	4-tert-octylphenol is an endocrine disruptor (cat 1) and adverse effects on reproductive systems has been reported. It is also persistent and it has been widely found in humans and the environment.	Official classification missing - 57f substance	#N/A	#N/A	#N/A	#N/A	#N/A	#N/A	#N/A	CAT1		0	0	0	0	0	0	0	1	1	0	0	2														0.3	0.6
27942-27-4	248-743-1	248-743-1	20-(4-nonylphenoxy)-3,6,9,12,15,18-hexaoxaicosan-1-ol	248-743-1	#N/A	#N/A	248-743-1	#N/A	#REF!	Nonylphenol etoxilates are categorized as endocrine disruptors (cat 1), they are the precursors of Nonyl phenol which is a persistent and bio-accumulative substance. It has been found in the environment.	Official classification missing - 57f substance	#N/A	#N/A	#N/A	Endocrine disrupting properties (Article 57(f) - environment)	#N/A	#N/A	#N/A	#N/A		0	0	0	0	0	0	0	1	1	0	0	2														1	2
33204-76-1	251-406-1	251-406-1	Quadrosilan; 2,6-cis-Diphenylhexamethylcyclotetrasiloxane	251-406-1	#N/A	#N/A	#N/A	#N/A	#REF!	Quadrosilan is an endocrine disruptor with estrogenic and antiandrogen activity, affecting reproductive organs and reproduction. It is categorized as an endocrine disruptor in the EU Commission EDC database.	Official classification missing - 57f substance	#N/A	#N/A	#N/A	#N/A	#N/A	#N/A	#N/A	CAT1		0	0	0	0	0	0	0	1	1	0	0	2														0.3	0.6
65996-85-2	266-019-3	266-019-3	Tar acids, coal, crude; crude phenols	#N/A	266-019-3	#N/A	#N/A	#N/A	#REF!	#N/A	#N/A	#N/A	H350 H340	#N/A	#N/A	#N/A	#N/A	#N/A	#N/A		0	0	0	0	1	1	0	0	0	0	0	2														1	2
68515-48-0	271-090-9	271-090-9	1,2-benzenedicarboxylic acid, di-C8-10- branched alkyl esters, C9-rich	271-090-9	271-090-9	#N/A	#N/A	#N/A	#REF!	For DINP reprotoxic effects and effects on development have been reported and it is a suspected endocrine disruptor. It has been detected in the environment and humans.	Official classification missing - 57f substance	#N/A	#N/A	#N/A	#N/A	#N/A	#N/A	#N/A	#N/A		0	0	0	0	0	0	1	1	0	0	0	2														1	2
84650-04-4	283-484-8	283-484-8	Distillates (coal tar), naphthalene oils; naphthalene oil	#N/A	283-484-8	#N/A	#N/A	#N/A	#REF!	#N/A	#N/A	#N/A	H350 H340	#N/A	#N/A	#N/A	#N/A	#N/A	#N/A		0	0	0	0	1	1	0	0	0	0	0	2														1	2
93925-00-9	300-298-5	300-298-5	Reaction products of 1,3,4-thiadiazolidine-2,5-dithione, formaldehyde and 4-heptylphenol, branched and linear (RP-HP)	300-298-5	#N/A	300-298-5	#N/A	#N/A	#REF!	Substance is concluded to be an endocrine disruptor SVHC by ECHA Member State Committee.	Official classifiaction missing - 57f substance	#N/A	#N/A	#N/A	Endocrine disrupting properties (Article 57(f) - environment)	#N/A	#N/A	#N/A	#N/A		0	0	0	0	0	0	0	1	1	0	0	2														1	2
122384-78-5	310-191-5	310-191-5	Low temperature tar oil, alkaline; extract residues (coal), low temperature coal tar alkaline	#N/A	310-191-5	#N/A	#N/A	#N/A	#REF!	#N/A	#N/A	#N/A	H350 H340	#N/A	#N/A	#N/A	#N/A	#N/A	#N/A		0	0	0	0	1	1	0	0	0	0	0	2														1	2
90035-08-8	421-960-0	421-960-0	flocoumafen (ISO)	421-960-0	#N/A	#N/A	#N/A	#N/A	#REF!	Substance is an endocrine disruptor with estrogenic and thyroid activity, affecting several body functions including development, brain and metabolism. The substance has been found in biomonitoring studies and in human milk. It is categorized as an endocr	Repr. 1B Acute Tox. 1 Acute Tox. 1 Acute Tox. 1 STOT RE 1 Aquatic Acute 1 Aquatic Chronic 1	H360D H330 H310 H300 H372 (blood) H400 H410	#N/A	#N/A	#N/A	#N/A	#N/A	#N/A	#N/A		0	0	1	0	0	0	1	0	0	0	0	2														0.3	0.6
9016-45-9	500-024-6	500-024-6	Nonylphenol, ethoxylated	500-024-6	500-024-6	#N/A	500-024-6	#N/A	#REF!	Nonylphenol etoxilates are categorized as endocrine disruptors (cat 1), they are the precursors of Nonyl phenol which is a persistent and bio-accumulative substance. It has been found in the environment.	Official classification missing - 57f substance	#N/A	#N/A	#N/A	Endocrine disrupting properties (Article 57(f) - environment)	#N/A	#N/A	#N/A	CAT1		0	0	0	0	0	0	0	1	1	0	0	2														1	2
26027-38-3	500-045-0	500-045-0	4-Nonylphenol, ethoxylated	500-045-0	500-045-0	#N/A	500-045-0	#N/A	#REF!	Nonylphenol etoxilates are categorized as endocrine disruptors (cat 1), they are the precursors of Nonyl phenol which is a persistent and bio-accumulative substance. It has been found in the environment.	Official classification missing - 57f substance	#N/A	#N/A	#N/A	Endocrine disrupting properties (Article 57(f) - environment)	#N/A	#N/A	#N/A	#N/A		0	0	0	0	0	0	0	1	1	0	0	2														1	2
127087-87-0	500-315-8	500-315-8	4-Nonylphenol, branched, ethoxylated	500-315-8	500-315-8	#N/A	500-315-8	#N/A	#REF!	Nonylphenol etoxilates are categorized as endocrine disruptors (cat 1), they are the precursors of Nonyl phenol which is a persistent and bio-accumulative substance. It has been found in the environment.	Official classification missing - 57f substance	#N/A	#N/A	#N/A	Endocrine disrupting properties (Article 57(f) - environment)	#N/A	#N/A	#N/A	#N/A		0	0	0	0	0	0	0	1	1	0	0	2														1	2
3050-88-2	-	608-492-4	Phenol, 4-nonyl-, phosphite (3:1)	#N/A	#N/A	608-492-4	#N/A	#N/A	#REF!	#N/A	#N/A	#N/A	#N/A	#N/A	Endocrine disrupting properties (Article 57(f) - environment)	#N/A	#N/A	#N/A	#N/A		0	0	0	0	0	0	0	1	1	0	0	2														1	2
37205-87-1	609-346-2	609-346-2	Isononylphenol, ethoxylated	#N/A	609-346-2	#N/A	609-346-2	#N/A	#REF!	#N/A	#N/A	#N/A	#N/A	#N/A	Endocrine disrupting properties (Article 57(f) - environment)	#N/A	#N/A	#N/A	#N/A		0	0	0	0	0	0	0	1	1	0	0	2														1	2
9002-93-1	618-344-0	618-344-0	Glycols, polyethylene, mono(p-(1,1,3,3-t = Octoxynol = Poly(oxy-1,2-ethanediyl), alpha-(4-(1.1.3.3.-tetramethyl-butyl)phenyl)-omega-hydroxy-	#N/A	#N/A	#N/A	618-344-0	#N/A	#REF!	#N/A	#N/A	#N/A	#N/A	#N/A	Endocrine disrupting properties (Article 57(f) - environment)	#N/A	#N/A	#N/A	#N/A		0	0	0	0	0	0	0	1	1	0	0	2														1	2
9036-19-5	618-541-1	618-541-1	Glycols, polyethylene, mono((1,1,3,3-tet = Poly(oxy-1,2-ethanediyl), .alpha.-[(1,1,3,3-tetramethylbutyl) phenyl]-.omega.-hydroxy-	#N/A	#N/A	#N/A	618-541-1	#N/A	#REF!	#N/A	#N/A	#N/A	#N/A	#N/A	Endocrine disrupting properties (Article 57(f) - environment)	#N/A	#N/A	#N/A	#N/A		0	0	0	0	0	0	0	1	1	0	0	2														1	2
2315-61-9	-	621-341-7	2-{2-[4-(2,4,4-trimethylpentan-2-yl)phenoxy]ethoxy}ethanol	#N/A	#N/A	#N/A	621-341-7	#N/A	#REF!	#N/A	#N/A	#N/A	#N/A	#N/A	Endocrine disrupting properties (Article 57(f) - environment)	#N/A	#N/A	#N/A	#N/A		0	0	0	0	0	0	0	1	1	0	0	2														1	2
2315-67-5	-	621-345-9	2-[[]4-(2,4,4-trimethylpentan-2-yl)phenoxy]ethan-1-ol	#N/A	#N/A	#N/A	621-345-9	#N/A	#REF!	#N/A	#N/A	#N/A	#N/A	#N/A	Endocrine disrupting properties (Article 57(f) - environment)	#N/A	#N/A	#N/A	#N/A		0	0	0	0	0	0	0	1	1	0	0	2														1	2
1119449-37-4	-	687-832-3	2-[4-(3,6-dimethylheptan-3-yl)phenoxy]ethanol	#N/A	#N/A	#N/A	687-832-3	#N/A	#REF!	#N/A	#N/A	#N/A	#N/A	#N/A	Endocrine disrupting properties (Article 57(f) - environment)	#N/A	#N/A	#N/A	#N/A		0	0	0	0	0	0	0	1	1	0	0	2														1	2
1119449-38-5	-	687-833-9	2-{2-[4-(3,6-dimethylheptan-3-yl)phenoxy]ethoxy}ethanol	#N/A	#N/A	#N/A	687-833-9	#N/A	#REF!	#N/A	#N/A	#N/A	#N/A	#N/A	Endocrine disrupting properties (Article 57(f) - environment)	#N/A	#N/A	#N/A	#N/A		0	0	0	0	0	0	0	1	1	0	0	2														1	2
9016-45-9	-	931-562-3	Poly(oxy-1,2-ethanediyl), a-(nonylphenyl)-w-hydroxy- (CAS 9016-45-9)	#N/A	#N/A	#N/A	931-562-3	#N/A	#REF!	#N/A	#N/A	#N/A	#N/A	#N/A	Endocrine disrupting properties (Article 57(f) - environment)	#N/A	#N/A	#N/A	CAT1		0	0	0	0	0	0	0	1	1	0	0	2														1	2
-	-	931-753-1	Nonylphenol, ethoxylated (6,5-EO) (9016-45-9)	#N/A	#N/A	#N/A	931-753-1	#N/A	#REF!	#N/A	#N/A	#N/A	#N/A	#N/A	Endocrine disrupting properties (Article 57(f) - environment)	#N/A	#N/A	#N/A	#N/A		0	0	0	0	0	0	0	1	1	0	0	2														1	2
-	-	931-754-7	Nonylphenol, ethoxylated (8-EO) (9016-45-9)	#N/A	#N/A	#N/A	931-754-7	#N/A	#REF!	#N/A	#N/A	#N/A	#N/A	#N/A	Endocrine disrupting properties (Article 57(f) - environment)	#N/A	#N/A	#N/A	#N/A		0	0	0	0	0	0	0	1	1	0	0	2														1	2
-	-	931-755-2	Nonylphenol, ethoxylated (10-EO) (9016-45-9)	#N/A	#N/A	#N/A	931-755-2	#N/A	#REF!	#N/A	#N/A	#N/A	#N/A	#N/A	Endocrine disrupting properties (Article 57(f) - environment)	#N/A	#N/A	#N/A	#N/A		0	0	0	0	0	0	0	1	1	0	0	2														1	2
-	-	931-756-8	Nonylphenol, ethoxylated (15-EO) (9016-45-9)	#N/A	#N/A	#N/A	931-756-8	#N/A	#REF!	#N/A	#N/A	#N/A	#N/A	#N/A	Endocrine disrupting properties (Article 57(f) - environment)	#N/A	#N/A	#N/A	#N/A		0	0	0	0	0	0	0	1	1	0	0	2														1	2
-	-	932-688-1	Nonylphenol, branched, ethoxylated (CAS# 68412-54-4)	#N/A	#N/A	#N/A	932-688-1	#N/A	#REF!	#N/A	#N/A	#N/A	#N/A	#N/A	Endocrine disrupting properties (Article 57(f) - environment)	#N/A	#N/A	#N/A	#N/A		0	0	0	0	0	0	0	1	1	0	0	2														1	2
-	-	932-998-7	Nonylphenolpolyglycolether	#N/A	#N/A	#N/A	932-998-7	#N/A	#REF!	#N/A	#N/A	#N/A	#N/A	#N/A	Endocrine disrupting properties (Article 57(f) - environment)	#N/A	#N/A	#N/A	#N/A		0	0	0	0	0	0	0	1	1	0	0	2														1	2
-	-	938-618-6	Nonylphenol, ethoxylated (polymer)	#N/A	#N/A	#N/A	938-618-6	#N/A	#REF!	#N/A	#N/A	#N/A	#N/A	#N/A	Endocrine disrupting properties (Article 57(f) - environment)	#N/A	#N/A	#N/A	#N/A		0	0	0	0	0	0	0	1	1	0	0	2														1	2
-	-	939-460-0	Reaction product of 1,3,4-thiadiazolidine-2,5-dithione, formaldehyde and phenol, heptyl derivs.	#N/A	#N/A	939-460-0	#N/A	#N/A	#REF!	#N/A	#N/A	#N/A	#N/A	#N/A	Endocrine disrupting properties (Article 57(f) - environment)	#N/A	#N/A	#N/A	#N/A		0	0	0	0	0	0	0	1	1	0	0	2														1	2
-	-	939-975-0	Nonylphenol, ethoxylated (EO = 4)	#N/A	#N/A	#N/A	939-975-0	#N/A	#REF!	#N/A	#N/A	#N/A	#N/A	#N/A	Endocrine disrupting properties (Article 57(f) - environment)	#N/A	#N/A	#N/A	#N/A		0	0	0	0	0	0	0	1	1	0	0	2														1	2
-	-	939-993-9	Nonylphenol, ethoxylated (EO = 10)	#N/A	#N/A	#N/A	939-993-9	#N/A	#REF!	#N/A	#N/A	#N/A	#N/A	#N/A	Endocrine disrupting properties (Article 57(f) - environment)	#N/A	#N/A	#N/A	#N/A		0	0	0	0	0	0	0	1	1	0	0	2														1	2
123-51-3	204-633-5	204-633-5	3-methylbutan-1-ol	#N/A	#N/A	#N/A	#N/A	204-633-5	#REF!	#N/A	#N/A	#N/A	#N/A	#N/A	#N/A	#N/A	#N/A	Suspected Carcinogenic#Suspected Reprotoxic#Suspected Sensitiser#Consumer use#Exposure of workers	#N/A		0	0	0	0	0.7	0	0.7	0	0	0.4	0	1.8														0.5	0.9
127-06-0	204-820-1	204-820-1	acetone oxime	#N/A	#N/A	#N/A	#N/A	204-820-1	#REF!	#N/A	#N/A	#N/A	#N/A	#N/A	#N/A	#N/A	#N/A	Suspected Carcinogenic#Suspected Mutagenic#Suspected Sensitiser#Exposure of environment#Exposure of workers#High RCR#Wide dispersive use	#N/A		0	0	0	0	0.7	0.7	0	0	0	0.4	0	1.8														0.5	0.9
25584-83-2	247-118-0	247-118-0	Acrylic acid, monoester with propane-1,2-diol	#N/A	#N/A	#N/A	#N/A	247-118-0	#REF!	#N/A	#N/A	#N/A	#N/A	#N/A	#N/A	#N/A	H331 H311 H301 H314 H317	Suspected Carcinogenic#Suspected Mutagenic#Suspected Sensitiser#Exposure of workers#High (aggregated) tonnage#High RCR#Other exposure/risk based concern#Wide dispersive use	#N/A		0	0	0	0	0.7	0.7	0	0	0	0.4	0	1.8														0.5	0.9
29736-75-2	249-820-2	249-820-2	2,5,7,10,11,14-hexaoxa-1,6-distibabicyclo[4.4.4]tetradecane	#N/A	#N/A	#N/A	#N/A	249-820-2	#REF!	#N/A	#N/A	#N/A	#N/A	#N/A	#N/A	#N/A	#N/A	Suspected Carcinogenic#Suspected Reprotoxic#Other hazard based concern#Exposure of workers	#N/A		0	0	0	0	0.7	0	0.7	0	0	0.4	0	1.8														0.5	0.9
77-73-6	201-052-9	201-052-9	3a,4,7,7a-tetrahydro-4,7-methanoindene	#N/A	#N/A	#N/A	#N/A	201-052-9	#REF!	#N/A	#N/A	#N/A	#N/A	#N/A	#N/A	#N/A	H225 H332 H302 H335 H315 H319 H411	Suspected Reprotoxic#Exposure of workers#High (aggregated) tonnage#High RCR	#N/A		0	0	1	0	0	0	0.7	0	0	0	0	1.7														0.5	0.85
98-01-1	202-627-7	202-627-7	2-furaldehyde	#N/A	#N/A	#N/A	#N/A	202-627-7	#REF!	#N/A	#N/A	#N/A	#N/A	#N/A	#N/A	#N/A	H351 H331 H301 H312 H335 H315 H319	Suspected Carcinogenic#Suspected Mutagenic#Exposure of workers#High (aggregated) tonnage#Wide dispersive use	#N/A		0	0	0	0	1	0.7	0	0	0	0	0	1.7														0.5	0.85
101-20-2	202-924-1	202-924-1	Triclocarban	#N/A	#N/A	#N/A	#N/A	202-924-1	#REF!	#N/A	#N/A	#N/A	#N/A	#N/A	#N/A	#N/A	#N/A	Suspected Reprotoxic#Potential endocrine disruptor#Wide dispersive use	CAT1		0	0	0	0	0	0	0.7	0	1	0	0	1.7														0.5	0.85
4067-16-7	223-775-9	223-775-9	3,6,9,12-tetraazatetradecamethylenediamine	#N/A	#N/A	#N/A	#N/A	223-775-9	#REF!	#N/A	#N/A	#N/A	#N/A	#N/A	#N/A	#N/A	H314 H317 H400 H410	Sensitiser#Consumer use#High (aggregated) tonnage#High RCR#Wide dispersive use	#N/A		0	0	1	0	0	0	0	0	0	0.6	0	1.6														0.5	0.8
7790-98-9	232-235-1	232-235-1	ammonium perchlorate	#N/A	#N/A	#N/A	#N/A	232-235-1	#REF!	#N/A	#N/A	#N/A	#N/A	#N/A	#N/A	#N/A	H201 H271	Suspected Carcinogenic#Potential endocrine disruptor#Other hazard based concern#Exposure of workers#High RCR#Wide dispersive use	#N/A		0	0	0	0	0.7	0	0	0	0.5	0.4	0	1.6														0.5	0.8
84539-55-9	-	283-044-5	-	#N/A	#N/A	#N/A	#N/A	283-044-5	#REF!	#N/A	#N/A	#N/A	#N/A	#N/A	#N/A	#N/A	#N/A	Suspected Reprotoxic#Potential endocrine disruptor#Suspected Sensitiser#Consumer use#Exposure of environment#Exposure of workers#Wide dispersive use	#N/A		0	0	0	0	0	0	0.7	0	0.5	0.4	0	1.6														0.5	0.8
-	405-420-1	405-420-1	EDDHMAFEK	#N/A	#N/A	#N/A	#N/A	405-420-1	#REF!	#N/A	#N/A	#N/A	#N/A	#N/A	#N/A	#N/A	#N/A	Suspected Reprotoxic#Potential endocrine disruptor#Suspected Sensitiser#Consumer use#Exposure of environment#Exposure of workers#Wide dispersive use	#N/A		0	0	0	0	0	0	0.7	0	0.5	0.4	0	1.6														0.5	0.8
-	-	938-828-8	-	#N/A	#N/A	#N/A	#N/A	938-828-8	#REF!	#N/A	#N/A	#N/A	#N/A	#N/A	#N/A	#N/A	#N/A	Suspected Reprotoxic#Potential endocrine disruptor#Suspected Sensitiser#Consumer use#Exposure of environment#Exposure of workers#Wide dispersive use	#N/A		0	0	0	0	0	0	0.7	0	0.5	0.4	0	1.6														0.5	0.8
55-55-0	-	200-237-1	-	#N/A	#N/A	#N/A	#N/A	200-237-1	#REF!	#N/A	#N/A	#N/A	#N/A	#N/A	#N/A	#N/A	H302; H410; H335;H373; H400	Mutagenic#Sensitiser#Other hazard based concern	#N/A		0	0	1	0	0	0	0	0	0	0.6	0	1.6														0.5	0.8
591-27-5	-	209-711-2	-	#N/A	#N/A	#N/A	#N/A	209-711-2	#REF!	#N/A	#N/A	#N/A	#N/A	#N/A	#N/A	#N/A	H302; H332; H411	Mutagenic#Sensitiser#Other hazard based concern	#N/A		0	0	1	0	0	0	0	0	0	0.6	0	1.6														0.5	0.8
84-75-3	201-559-5	201-559-5	dihexyl phthalate (DHP)	201-559-5	#N/A	201-559-5	201-559-5	#N/A	#REF!	Dihexyl phthalate (DnHP) is an endocrine disruptor with thyroid and antiandrogen activity, affecting several body functions including reproduction, development and metabolism. It is categorized as an endocrine disruptor in the EU Commission EDC database.	Repr. 1B	H360FD	#N/A	H360FD	Toxic for reproduction (Article 57c)	#N/A	#N/A	#N/A	CAT2		0	0	0	0	0	0	1	0	0.5	0	0	1.5														1	1.5
131-57-7	205-031-5	205-031-5	Benzophenone-3; Oxybenzone	205-031-5	#N/A	#N/A	#N/A	205-031-5	#REF!	Benzophenone-3 (BP-3) is an endocrine disruptor with estrogenic, antiandrogen and thyroid activity, affecting several body functions including development and immune function. The substance has been found in biomonitoring studies and in human milk and uri	Official classification missing - 57f substance	#N/A	#N/A	#N/A	#N/A	#N/A	#N/A	Potential endocrine disruptor#Cumulative exposure#Exposure of environment#Exposure of sensitive populations#Exposure of workers#Wide dispersive use	CAT2		0	0	0	0	0	0	0	1	0.5	0	0	1.5														0.5	0.75
137-30-4	205-288-3	205-288-3	Ziram	205-288-3	#N/A	#N/A	#N/A	205-288-3	#REF!	This substance has endocrine disrupting properties.In vivo exposure to the substance has resulted in decreased fertility, sperm abnormalities and skeletal, muscular and nervous abnormalities in rodent offspring. In vivo and in vitro studies show negative	Acute Tox. 4 * Skin Sens. 1v Eye Dam. 1 Acute Tox. 2 * STOT SE 3 STOT RE 2 * Aquatic Acute 1 Aquatic Chronic 1	H302 H317 H318 H330 H335 H373 ** H400 H410	#N/A	#N/A	#N/A	#N/A	H330 H302 H335 H373 ** H318 H317 H400 H410	Potential endocrine disruptor#High RCR	CAT2		0	0	1	0	0	0	0	0	0.5	0	0	1.5														0.5	0.75
6864-37-5	229-962-1	229-962-1	2,2'-dimethyl-4,4'-methylenebis(cyclohexylamine)	#N/A	#N/A	#N/A	#N/A	229-962-1	#REF!	#N/A	#N/A	#N/A	#N/A	#N/A	#N/A	#N/A	H331 H311 H302 H314 H411	Potential endocrine disruptor	#N/A		0	0	1	0	0	0	0	0	0.5	0	0	1.5														0.5	0.75
13674-87-8	237-159-2	237-159-2	TDCIPP	237-159-2	#N/A	#N/A	#N/A	237-159-2	#REF!	This substance has been detected in children who are exposed to the chemical through house dust. It is a suspected carcinogen. The substance shows experimental and estimated P and T properties. It is considered to be of equivalent level of concern.	Carc. 2	H351	#N/A	#N/A	#N/A	#N/A	H351	Potential endocrine disruptor	#N/A		0	0	0	0	1	0	0	0	0.5	0	0	1.5														0.5	0.75
20427-84-3	243-816-4	243-816-4	2-[2-(4-nonylphenoxy)ethoxy]ethanol	#N/A	#N/A	#N/A	243-816-4	#N/A	#REF!	#N/A	#N/A	#N/A	#N/A	#N/A	Endocrine disrupting properties (Article 57(f) - environment)	#N/A	#N/A	#N/A	CAT2		0	0	0	0	0	0	0	1	0.5	0	0	1.5														1	1.5
21145-77-7	244-240-6	244-240-6	Tonalide	244-240-6	#N/A	#N/A	#N/A	244-240-6	#REF!	For Tonalide (AHTN) endocrine effects have been reported. It is potentially persistent and bioaccumulative. It has been frequently found in humans and the environment.	Official classification missing - 57f substance	#N/A	#N/A	#N/A	#N/A	#N/A	#N/A	Potential endocrine disruptor#High (aggregated) tonnage	#N/A		0	0	0	0	0	0	0	1	0.5	0	0	1.5														0.5	0.75
21145-77-7	244-240-6	244-240-6	1-(5,6,7,8-tetrahydro-3,5,5,6,8,8-hexamethyl-2-naphthyl)ethan-1-one	244-240-6	#N/A	#N/A	#N/A	244-240-6	#REF!	For Tonalide (AHTN) endocrine effects have been reported. It is potentially persistent and bioaccumulative. It has been frequently found in humans and the environment.	Official classification missing - 57f substance	#N/A	#N/A	#N/A	#N/A	#N/A	#N/A	Potential endocrine disruptor#High (aggregated) tonnage	#N/A		0	0	0	0	0	0	0	1	0.5	0	0	1.5														0.5	0.75
14409-72-4	604-395-6	604-395-6	Nonaethylene glycol p-nonylphenyl ether	604-395-6	#N/A	#N/A	604-395-6	#N/A	#REF!	Nonylphenol etoxilates are categorized as endocrine disruptors (cat 1), they are the precursors of Nonyl phenol which is a persistent and bio-accumulative substance. It has been found in the environment.	Official classification missing - 57f substance	#N/A	#N/A	#N/A	Endocrine disrupting properties (Article 57(f) - environment)	#N/A	#N/A	#N/A	CAT2		0	0	0	0	0	0	0	1	0.5	0	0	1.5														1	1.5
95235-30-6	-	405-520-5	-	#N/A	#N/A	#N/A	#N/A	405-520-5	#REF!	#N/A	#N/A	#N/A	#N/A	#N/A	#N/A	#N/A	H411	Potential endocrine disruptor#Other exposure/risk based concern	#N/A		0	0	1	0	0	0	0	0	0.5	0	0	1.5														0.5	0.75
98-85-1	202-707-1	202-707-1	1-phenylethanol	#N/A	#N/A	#N/A	#N/A	202-707-1	#REF!	#N/A	#N/A	#N/A	#N/A	#N/A	#N/A	#N/A	#N/A	Suspected Carcinogenic#Suspected Mutagenic#Consumer use#Exposure of workers#Wide dispersive use	#N/A		0	0	0	0	0.7	0.7	0	0	0	0	0	1.4														0.5	0.7
108-95-2	203-632-7	203-632-7	Phenol	#N/A	#N/A	#N/A	#N/A	203-632-7	#REF!	#N/A	#N/A	#N/A	#N/A	#N/A	#N/A	#N/A	H341 H331 H311 H301 H373 ** H314	Suspected Mutagenic#Other hazard based concern#Consumer use#Exposure of workers#High (aggregated) tonnage#High RCR	#N/A		0	0	0	0	0	1	0	0	0	0.4	0	1.4														0.5	0.7
646-06-0	211-463-5	211-463-5	1,3-dioxolane	#N/A	#N/A	#N/A	#N/A	211-463-5	#REF!	#N/A	#N/A	#N/A	#N/A	#N/A	#N/A	#N/A	H225	Suspected Mutagenic#Suspected Reprotoxic#Consumer use#Exposure of sensitive populations#High (aggregated) tonnage#Wide dispersive use	#N/A		0	0	0	0	0	0.7	0.7	0	0	0	0	1.4														0.5	0.7
1112-39-6	214-189-4	214-189-4	Dimethoxydimethylsilane	#N/A	#N/A	#N/A	#N/A	214-189-4	#REF!	#N/A	#N/A	#N/A	#N/A	#N/A	#N/A	#N/A	#N/A	Reprotoxic#Other hazard based concern#Exposure of workers	#N/A		0	0	0	0	0	0	1	0	0	0.4	0	1.4														0.5	0.7
3468-63-1	222-429-4	222-429-4	1-[(2,4-dinitrophenyl)azo]-2-naphthol	#N/A	#N/A	#N/A	#N/A	222-429-4	#REF!	#N/A	#N/A	#N/A	#N/A	#N/A	#N/A	#N/A	#N/A	Suspected Carcinogenic#Suspected Reprotoxic#Exposure of workers#Wide dispersive use	#N/A		0	0	0	0	0.7	0	0.7	0	0	0	0	1.4														0.5	0.7
3710-84-7	223-055-4	223-055-4	N,N-diethylhydroxylamine	#N/A	#N/A	#N/A	#N/A	223-055-4	#REF!	#N/A	#N/A	#N/A	#N/A	#N/A	#N/A	#N/A	#N/A	Suspected Carcinogenic#Suspected Mutagenic	#N/A		0	0	0	0	0.7	0.7	0	0	0	0	0	1.4														0.5	0.7
10508-09-5	234-042-8	234-042-8	di-tert-pentyl peroxide	#N/A	#N/A	#N/A	#N/A	234-042-8	#REF!	#N/A	#N/A	#N/A	#N/A	#N/A	#N/A	#N/A	#N/A	Suspected Carcinogenic#Suspected Mutagenic#Exposure of workers#Wide dispersive use	#N/A		0	0	0	0	0.7	0.7	0	0	0	0	0	1.4														0.5	0.7
10544-72-6	234-126-4	234-126-4	dinitrogen tetraoxide	#N/A	#N/A	#N/A	#N/A	234-126-4	#REF!	#N/A	#N/A	#N/A	#N/A	#N/A	#N/A	#N/A	H270 H330 H314	Suspected Mutagenic#Suspected Reprotoxic#Exposure of workers#High RCR	#N/A		0	0	0	0	0	0.7	0.7	0	0	0	0	1.4														0.5	0.7
36483-57-5	253-057-0	253-057-0	2,2-dimethylpropan-1-ol, tribromo derivative	#N/A	#N/A	#N/A	#N/A	253-057-0	#REF!	#N/A	#N/A	#N/A	#N/A	#N/A	#N/A	#N/A	#N/A	Suspected Carcinogenic#Suspected Mutagenic	#N/A		0	0	0	0	0.7	0.7	0	0	0	0	0	1.4														0.5	0.7
68526-83-0	271-231-4	271-231-4	alcohols, C7-9-iso-, C8-rich	#N/A	#N/A	#N/A	#N/A	271-231-4	#REF!	#N/A	#N/A	#N/A	#N/A	#N/A	#N/A	#N/A	#N/A	Suspected Carcinogenic#Suspected Mutagenic#Consumer use#Exposure of workers#Wide dispersive use	#N/A		0	0	0	0	0.7	0.7	0	0	0	0	0	1.4														0.5	0.7
613-62-7	405-490-3	405-490-3	2-(phenylmethoxy)naphthalene	#N/A	#N/A	#N/A	#N/A	405-490-3	#REF!	#N/A	#N/A	#N/A	#N/A	#N/A	#N/A	#N/A	H413	Other hazard based concern#High (aggregated) tonnage	#N/A		0	0	1	0	0	0	0	0	0	0.4	0	1.4														0.5	0.7
1222-05-5	214-946-9	214-946-9	Galaxolide	214-946-9	#N/A	#N/A	#N/A	#N/A	#REF!	For Galaxolide (HHCB) endocrine effects have been reported. It is potentially persistent and bioaccumulative. It has been frequently found in humans and the environment.	Aquatic Acute 1 Aquatic Chronic 1	H400 H410	#N/A	#N/A	#N/A	#N/A	#N/A	#N/A	CAT3b		0	0	1	0	0	0	0	0	0.3	0	0	1.3														0.3	0.39
68609-97-2	271-846-8	271-846-8	Oxirane, mono[(C12-14-alkyloxy)methyl] derivs.	#N/A	#N/A	#N/A	#N/A	271-846-8	#REF!	#N/A	#N/A	#N/A	#N/A	#N/A	#N/A	#N/A	H315 H317	Suspected Mutagenic#Sensitiser#Other hazard based concern#Consumer use#Exposure of workers#High (aggregated) tonnage	#N/A		0	0	0	0	0	0.7	0	0	0	0.6	0	1.3														0.5	0.65
78-93-3	201-159-0	201-159-0	Butanone	#N/A	#N/A	#N/A	#N/A	201-159-0	#REF!	#N/A	#N/A	#N/A	#N/A	#N/A	#N/A	#N/A	H225 H336 H319	Suspected Reprotoxic#Wide dispersive use#Consumer use#Exposure of environment#Exposure of workers#High RCR#High (aggregated) tonnage#Potential endocrine disruptor	#N/A		0	0	0	0	0	0	0.7	0	0.5	0	0	1.2														0.5	0.6
119-47-1	204-327-1	204-327-1	6,6'-di-tert-butyl-2,2'-methylenedi-p-cresol	#N/A	#N/A	#N/A	#N/A	204-327-1	#REF!	#N/A	#N/A	#N/A	#N/A	#N/A	#N/A	#N/A	#N/A	Suspected Reprotoxic#Potential endocrine disruptor	#N/A		0	0	0	0	0	0	0.7	0	0.5	0	0	1.2														0.5	0.6
1453-58-3	215-925-7	215-925-7	3-methylpyrazole	#N/A	#N/A	#N/A	#N/A	215-925-7	#REF!	#N/A	#N/A	#N/A	#N/A	#N/A	#N/A	#N/A	#N/A	Suspected Reprotoxic#Potential endocrine disruptor#Exposure of environment#Wide dispersive use	#N/A		0	0	0	0	0	0	0.7	0	0.5	0	0	1.2														0.5	0.6
32492-61-8	500-082-2	500-082-2	2-[4-[2-[4-(2-hydroxyethoxy)phenyl]propan-2-yl]phenoxy]ethanol	#N/A	#N/A	#N/A	#N/A	500-082-2	#REF!	#N/A	#N/A	#N/A	#N/A	#N/A	#N/A	#N/A	#N/A	Suspected Mutagenic#Potential endocrine disruptor#Exposure of environment#High (aggregated) tonnage#Wide dispersive use	#N/A		0	0	0	0	0	0.7	0	0	0.5	0	0	1.2														0.5	0.6
1514-82-5	-	627-872-0	-	#N/A	#N/A	#N/A	#N/A	627-872-0	#REF!	#N/A	#N/A	#N/A	#N/A	#N/A	#N/A	#N/A	H302; H312;H332; H315; H319; H335; H336; H224; H424	Suspected Reprotoxic#Potential endocrine disruptor	#N/A		0	0	0	0	0	0	0.7	0	0.5	0	0	1.2														0.5	0.6
96-49-1	202-510-0	202-510-0	ethylene carbonate	#N/A	#N/A	#N/A	#N/A	202-510-0	#REF!	#N/A	#N/A	#N/A	#N/A	#N/A	#N/A	#N/A	#N/A	Suspected Reprotoxic#Other hazard based concern#Consumer use#Exposure of workers#High (aggregated) tonnage#Wide dispersive use	#N/A		0	0	0	0	0	0	0.7	0	0	0.4	0	1.1														0.5	0.55
109-60-4	203-686-1	203-686-1	propyl acetate	#N/A	#N/A	#N/A	#N/A	203-686-1	#REF!	#N/A	#N/A	#N/A	#N/A	#N/A	#N/A	#N/A	H225 H336 H319	Suspected Reprotoxic#Other hazard based concern#Consumer use#Exposure of workers#High (aggregated) tonnage#Wide dispersive use	#N/A		0	0	0	0	0	0	0.7	0	0	0.4	0	1.1														0.5	0.55
127-68-4	204-857-3	204-857-3	Sodium 3-nitrobenzene sulphonate	#N/A	#N/A	#N/A	#N/A	204-857-3	#REF!	#N/A	#N/A	#N/A	#N/A	#N/A	#N/A	#N/A	H319 H317	Suspected Reprotoxic#Other hazard based concern#Exposure of workers#High (aggregated) tonnage	#N/A		0	0	0	0	0	0	0.7	0	0	0.4	0	1.1														0.5	0.55
1843-05-6	217-421-2	217-421-2	Octabenzone	#N/A	#N/A	#N/A	#N/A	217-421-2	#REF!	#N/A	#N/A	#N/A	#N/A	#N/A	#N/A	#N/A	#N/A	Potential endocrine disruptor#Sensitiser#Consumer use#High (aggregated) tonnage#Wide dispersive use	#N/A		0	0	0	0	0	0	0	0	0.5	0.6	0	1.1														0.5	0.55
5026-74-4	225-716-2	225-716-2	p-(2,3-epoxypropoxy)-N,N-bis(2,3-epoxypropyl)aniline	#N/A	#N/A	#N/A	#N/A	225-716-2	#REF!	#N/A	#N/A	#N/A	#N/A	#N/A	#N/A	#N/A	#N/A	Suspected Mutagenic#Suspected Sensitiser#Consumer use#Exposure of workers	#N/A		0	0	0	0	0	0.7	0	0	0	0.4	0	1.1														0.5	0.55
-	701-160-0	701-160-0	Tangled Multi-Walled Carbon Nanotubes	#N/A	#N/A	#N/A	#N/A	701-160-0	#REF!	#N/A	#N/A	#N/A	#N/A	#N/A	#N/A	#N/A	#N/A	Suspected Carcinogenic#Other hazard based concern#Consumer use#Cumulative exposure#Exposure of environment#Wide dispersive use	#N/A		0	0	0	0	0.7	0	0	0	0	0.4	0	1.1														0.5	0.55
-	-	905-562-9	-	#N/A	#N/A	#N/A	#N/A	905-562-9	#REF!	#N/A	#N/A	#N/A	#N/A	#N/A	#N/A	#N/A	#N/A	Suspected Reprotoxic#Suspected Sensitiser#Other hazard based concern#Consumer use#Exposure of sensitive populations#High (aggregated) tonnage#High RCR#Wide dispersive use	#N/A		0	0	0	0	0	0	0.7	0	0	0.4	0	1.1														0.5	0.55
-	-	905-588-0	-	#N/A	#N/A	#N/A	#N/A	905-588-0	#REF!	#N/A	#N/A	#N/A	#N/A	#N/A	#N/A	#N/A	#N/A	Suspected Reprotoxic#Suspected Sensitiser#Other hazard based concern#Consumer use#Exposure of sensitive populations#High (aggregated) tonnage#High RCR#Wide dispersive use	#N/A		0	0	0	0	0	0	0.7	0	0	0.4	0	1.1														0.5	0.55
308062-28-4	931-292-6	931-292-6	Amines, C12-14 (even numbered)-alkyldimethyl, N-oxides	#N/A	#N/A	#N/A	#N/A	931-292-6	#REF!	#N/A	#N/A	#N/A	#N/A	#N/A	#N/A	#N/A	#N/A	Suspected Reprotoxic#Other hazard based concern	#N/A		0	0	0	0	0	0	0.7	0	0	0.4	0	1.1														0.5	0.55
-	931-700-2	931-700-2	Betaines, C12-14 (even numbered)-alkyldimethyl	#N/A	#N/A	#N/A	#N/A	931-700-2	#REF!	#N/A	#N/A	#N/A	#N/A	#N/A	#N/A	#N/A	#N/A	Suspected Reprotoxic#Other hazard based concern#Consumer use#Exposure of environment#Exposure of workers#High (aggregated) tonnage#High RCR#Wide dispersive use	#N/A		0	0	0	0	0	0	0.7	0	0	0.4	0	1.1														0.5	0.55
-	936-414-1	936-414-1	Multi-Walled Carbon Nanotubes (MWCNT), synthetic graphite in tubular shape	#N/A	#N/A	#N/A	#N/A	936-414-1	#REF!	#N/A	#N/A	#N/A	#N/A	#N/A	#N/A	#N/A	#N/A	Suspected Carcinogenic#Other hazard based concern#Consumer use#Cumulative exposure#Exposure of environment#Wide dispersive use	#N/A		0	0	0	0	0.7	0	0	0	0	0.4	0	1.1														0.5	0.55
4247-02-3	-	-	Isobutyl paraben	#N/A	#N/A	#N/A	#N/A	#N/A	4247-02-3	#N/A	#N/A	#N/A	#N/A	#N/A	#N/A	#N/A	#N/A	#N/A	CAT1		0	0	0	0	0	0	0	0	1	0	0	1														0.3	0.3
1918-02-1	-	-	Picloram	#N/A	#N/A	#N/A	#N/A	#N/A	1918-02-1	#N/A	#N/A	#N/A	#N/A	#N/A	#N/A	#N/A	#N/A	#N/A	CAT1		0	0	0	0	0	0	0	0	1	0	0	1														0.3	0.3
1983-10-4	-	-	Stannane, tributylfluoro-	#N/A	#N/A	#N/A	#N/A	#N/A	1983-10-4	#N/A	#N/A	#N/A	#N/A	#N/A	#N/A	#N/A	#N/A	#N/A	CAT1		0	0	0	0	0	0	0	0	1	0	0	1														0.3	0.3
4329-12-8	-	-	m,p'-DDD	#N/A	#N/A	#N/A	#N/A	#N/A	4329-12-8	#N/A	#N/A	#N/A	#N/A	#N/A	#N/A	#N/A	#N/A	#N/A	CAT1		0	0	0	0	0	0	0	0	1	0	0	1														0.3	0.3
8018-01-7	-	-	Mancozeb	#N/A	#N/A	#N/A	#N/A	#N/A	8018-01-7	#N/A	#N/A	#N/A	#N/A	#N/A	#N/A	#N/A	#N/A	#N/A	CAT1		0	0	0	0	0	0	0	0	1	0	0	1														0.3	0.3
-	-	-	Perfluorobutane sulfonic acid (PFBS) and its salts	#N/A	#N/A	Perfluorobutane sulfonic acid (PFBS) and its salts	#N/A	#N/A	#N/A	#N/A	#N/A	#N/A	#N/A	#N/A	Equivalent level of concern having probable serious effects to human health (Article 57(f) - human health)#Equivalent level of concern having probable serious effects to the environment (Article 57(f) - environment)	#N/A	#N/A	#N/A	#N/A		0	0	0	0	0	0	0	1	0	0	0	1														1	1
-	-	-	2,3,3,3-tetrafluoro-2-(heptafluoropropoxy)propionic acid, its salts and its acyl halides	#N/A	#N/A	2,3,3,3-tetrafluoro-2-(heptafluoropropoxy)propionic acid, its salts and its acyl halides	#N/A	#N/A	#N/A	#N/A	#N/A	#N/A	#N/A	#N/A	Equivalent level of concern having probable serious effects to human health (Article 57(f) - human health)#Equivalent level of concern having probable serious effects to the environment (Article 57(f) - environment)	#N/A	#N/A	#N/A	#N/A		0	0	0	0	0	0	0	1	0	0	0	1														1	1
-	-	-	1,6,7,8,9,14,15,16,17,17,18,18-Dodecachloropentacyclo[12.2.1.16,9.02,13.05,10]octadeca-7,15-diene (“Dechlorane Plus”™)	#N/A	#N/A	1,6,7,8,9,14,15,16,17,17,18,18-Dodecachloropentacyclo[12.2.1.16,9.02,13.05,10]octadeca-7,15-diene (“Dechlorane Plus”™)	#N/A	#N/A	#N/A	#N/A	#N/A	#N/A	#N/A	#N/A	vPvB (Article 57e)	#N/A	#N/A	#N/A	#N/A		0	1	0	0	0	0	0	0	0	0	0	1														1	1
-	-	-	rel-(1R,4S,4aS,6aS,7S,10R,10aR,12aR)-1,2,3,4,7,8,9,10,13,13,14,14-dodecachloro-1,4,4a,5,6,6a,7,10,10a,11,12,12a-dodecahydro-1,4:7,10-dimethanodibenzo[a,e]cyclooctene	#N/A	#N/A	rel-(1R,4S,4aS,6aS,7S,10R,10aR,12aR)-1,2,3,4,7,8,9,10,13,13,14,14-dodecachloro-1,4,4a,5,6,6a,7,10,10a,11,12,12a-dodecahydro-1,4:7,10-dimethanodibenzo[a,e]cyclooctene	#N/A	#N/A	#N/A	#N/A	#N/A	#N/A	#N/A	#N/A	vPvB (Article 57e)	#N/A	#N/A	#N/A	#N/A		0	1	0	0	0	0	0	0	0	0	0	1														1	1
-	-	-	rel-(1R,4S,4aS,6aR,7R,10S,10aS,12aR)-1,2,3,4,7,8,9,10,13,13,14,14-dodecachloro-1,4,4a,5,6,6a,7,10,10a,11,12,12a-dodecahydro-1,4:7,10-dimethanodibenzo[a,e]cyclooctene	#N/A	#N/A	rel-(1R,4S,4aS,6aR,7R,10S,10aS,12aR)-1,2,3,4,7,8,9,10,13,13,14,14-dodecachloro-1,4,4a,5,6,6a,7,10,10a,11,12,12a-dodecahydro-1,4:7,10-dimethanodibenzo[a,e]cyclooctene	#N/A	#N/A	#N/A	#N/A	#N/A	#N/A	#N/A	#N/A	vPvB (Article 57e)	#N/A	#N/A	#N/A	#N/A		0	1	0	0	0	0	0	0	0	0	0	1														1	1
-	-	-	1,2-benzenedicarboxylic acid, di-C6-10-alkyl esters or mixed decyl and hexyl and octyl diesters	#N/A	#N/A	1,2-benzenedicarboxylic acid, di-C6-10-alkyl esters or mixed decyl and hexyl and octyl diesters	1,2-benzenedicarboxylic acid, di-C6-10-alkyl esters or mixed decyl and hexyl and octyl diesters	#N/A	#N/A	#N/A	#N/A	#N/A	#N/A	#N/A	Toxic for reproduction (Article 57c)	#N/A	#N/A	#N/A	#N/A		0	0	0	0	0	0	1	0	0	0	0	1														1	1
-	-	-	Sodium perborate, perboric acid, sodium salt	#N/A	#N/A	Sodium perborate, perboric acid, sodium salt	Sodium perborate, perboric acid, sodium salt	#N/A	#N/A	#N/A	#N/A	#N/A	#N/A	#N/A	Toxic for reproduction (Article 57c)	#N/A	#N/A	#N/A	#N/A		0	0	0	0	0	0	1	0	0	0	0	1														1	1
-	-	-	5-sec-butyl-2-(2,4-dimethylcyclohex-3-en-1-yl)-5-methyl-1,3-dioxane [1], 5-sec-butyl-2-(4,6-dimethylcyclohex-3-en-1-yl)-5-methyl-1,3-dioxane [2]	#N/A	#N/A	5-sec-butyl-2-(2,4-dimethylcyclohex-3-en-1-yl)-5-methyl-1,3-dioxane [1], 5-sec-butyl-2-(4,6-dimethylcyclohex-3-en-1-yl)-5-methyl-1,3-dioxane [2]	5-sec-butyl-2-(2,4-dimethylcyclohex-3-en-1-yl)-5-methyl-1,3-dioxane [1], 5-sec-butyl-2-(4,6-dimethylcyclohex-3-en-1-yl)-5-methyl-1,3-dioxane [2]	#N/A	#N/A	#N/A	#N/A	#N/A	#N/A	#N/A	vPvB (Article 57e)	#N/A	#N/A	#N/A	#N/A		0	1	0	0	0	0	0	0	0	0	0	1														1	1
-	-	-	5-sec-butyl-2-(2,4-dimethylcyclohex-3-en-1-yl)-5-methyl-1,3-dioxane	#N/A	#N/A	5-sec-butyl-2-(2,4-dimethylcyclohex-3-en-1-yl)-5-methyl-1,3-dioxane	5-sec-butyl-2-(2,4-dimethylcyclohex-3-en-1-yl)-5-methyl-1,3-dioxane	#N/A	#N/A	#N/A	#N/A	#N/A	#N/A	#N/A	vPvB (Article 57e)	#N/A	#N/A	#N/A	#N/A		0	1	0	0	0	0	0	0	0	0	0	1														1	1
-	-	-	5-sec-butyl-2-(4,6-dimethylcyclohex-3-en-1-yl)-5-methyl-1,3-dioxane	#N/A	#N/A	5-sec-butyl-2-(4,6-dimethylcyclohex-3-en-1-yl)-5-methyl-1,3-dioxane	5-sec-butyl-2-(4,6-dimethylcyclohex-3-en-1-yl)-5-methyl-1,3-dioxane	#N/A	#N/A	#N/A	#N/A	#N/A	#N/A	#N/A	vPvB (Article 57e)	#N/A	#N/A	#N/A	#N/A		0	1	0	0	0	0	0	0	0	0	0	1														1	1
100532-36-3	-	-	Phenol, 4-(5- methylhexyl)-	100532-36-3	#N/A	#N/A	#N/A	#N/A	#N/A	Substance is concluded to be an endocrine disruptor SVHC by ECHA Member State Committee.	Official classification missing - 57f substance	#N/A	#N/A	#N/A	#N/A	#N/A	#N/A	#N/A	#N/A		0	0	0	0	0	0	0	1	0	0	0	1														0.3	0.3
100702-98-5	-	-	4,4'-Dihydroxy-2,3,5,6-tetrachlorobiphenyl	#N/A	#N/A	#N/A	#N/A	#N/A	100702-98-5	#N/A	#N/A	#N/A	#N/A	#N/A	#N/A	#N/A	#N/A	#N/A	CAT1		0	0	0	0	0	0	0	0	1	0	0	1														0.3	0.3
101-53-1	-	-	Phenyl-4-hydroxyphenylmethane = 4-Benzylphenol = p-Benzylphenol	#N/A	#N/A	#N/A	#N/A	#N/A	101-53-1	#N/A	#N/A	#N/A	#N/A	#N/A	#N/A	#N/A	#N/A	#N/A	CAT1		0	0	0	0	0	0	0	0	1	0	0	1														0.3	0.3
1022-22-6	-	-	p,p'-DDMU	#N/A	#N/A	#N/A	#N/A	#N/A	1022-22-6	#N/A	#N/A	#N/A	#N/A	#N/A	#N/A	#N/A	#N/A	#N/A	CAT1		0	0	0	0	0	0	0	0	1	0	0	1														0.3	0.3
102570-52-5	-	-	Phenol, 4-(3- methylhexyl)-	102570-52-5	#N/A	#N/A	#N/A	#N/A	#N/A	Substance is concluded to be an endocrine disruptor SVHC by ECHA Member State Committee.	Official classification missing - 57f substance	#N/A	#N/A	#N/A	#N/A	#N/A	#N/A	#N/A	#N/A		0	0	0	0	0	0	0	1	0	0	0	1														0.3	0.3
104-35-8	-	-	4-Nonyl Phenol Monoethoxylate	104-35-8	#N/A	#N/A	#N/A	#N/A	#N/A	Nonylphenol etoxilates are categorized as endocrine disruptors (cat 1), they are the precursors of Nonyl phenol which is a persistent and bio-accumulative substance. It has been found in the environment.	Official classification missing - 57f substance	#N/A	#N/A	#N/A	#N/A	#N/A	#N/A	#N/A	#N/A		0	0	0	0	0	0	0	1	0	0	0	1														0.3	0.3
10453-86-8	-	-	Resmethrin	#N/A	#N/A	#N/A	#N/A	#N/A	10453-86-8	#N/A	#N/A	#N/A	#N/A	#N/A	#N/A	#N/A	#N/A	#N/A	CAT1		0	0	0	0	0	0	0	0	1	0	0	1														0.3	0.3
106599-06-8	-	-	Phenol, p-sec-nonyl-, phosphite (TNPP)	106599-06-8	#N/A	#N/A	#N/A	#N/A	#N/A	Substance is concluded to be an endocrine disruptor SVHC by ECHA Member State Committe when including = 0,1% 4-NonylPhenol.	Skin Sens. 1; _x000D_ Aquatic Acute 1;_x000D_ Aquatic Chronic 1	H317;_x000D_ H400;_x000D_ H410	#N/A	#N/A	#N/A	#N/A	#N/A	#N/A	#N/A		0	0	1	0	0	0	0	0	0	0	0	1														0.3	0.3
11081-15-5	-	-	Phenol, isooctyl-	#N/A	#N/A	#N/A	#N/A	#N/A	11081-15-5	#N/A	#N/A	#N/A	#N/A	#N/A	#N/A	#N/A	#N/A	#N/A	CAT1		0	0	0	0	0	0	0	0	1	0	0	1														0.3	0.3
11096-82-5	-	-	PCB Aroclor 1260 (Clophen A60)	#N/A	#N/A	#N/A	#N/A	#N/A	11096-82-5	#N/A	#N/A	#N/A	#N/A	#N/A	#N/A	#N/A	#N/A	#N/A	CAT1		0	0	0	0	0	0	0	0	1	0	0	1														0.3	0.3
11097-69-1	-	-	PCB Aroclor 1254	#N/A	#N/A	#N/A	#N/A	#N/A	11097-69-1	#N/A	#N/A	#N/A	#N/A	#N/A	#N/A	#N/A	#N/A	#N/A	CAT1		0	0	0	0	0	0	0	0	1	0	0	1														0.3	0.3
1113-02-6	-	-	Omethoate	#N/A	#N/A	#N/A	#N/A	#N/A	1113-02-6	#N/A	#N/A	#N/A	#N/A	#N/A	#N/A	#N/A	#N/A	#N/A	CAT1		0	0	0	0	0	0	0	0	1	0	0	1														0.3	0.3
1131-60-8	-	-	4-Cyclohexylphenol	#N/A	#N/A	#N/A	#N/A	#N/A	1131-60-8	#N/A	#N/A	#N/A	#N/A	#N/A	#N/A	#N/A	#N/A	#N/A	CAT1		0	0	0	0	0	0	0	0	1	0	0	1														0.3	0.3
1139800-98-8	-	-	Phenol, 4-(4- methylhexyl)-	1139800-98-8	#N/A	#N/A	#N/A	#N/A	#N/A	Substance is concluded to be an endocrine disruptor SVHC by ECHA Member State Committee.	Official classification missing - 57f substance	#N/A	#N/A	#N/A	#N/A	#N/A	#N/A	#N/A	#N/A		0	0	0	0	0	0	0	1	0	0	0	1														0.3	0.3
118174-38-2	-	-	6-Methyl-1,3,8-trichlorodibenzofuran	#N/A	#N/A	#N/A	#N/A	#N/A	118174-38-2	#N/A	#N/A	#N/A	#N/A	#N/A	#N/A	#N/A	#N/A	#N/A	CAT1		0	0	0	0	0	0	0	0	1	0	0	1														0.3	0.3
12002-48-1	-	-	Trichlorobenzene	#N/A	#N/A	#N/A	#N/A	#N/A	12002-48-1	#N/A	#N/A	#N/A	#N/A	#N/A	#N/A	#N/A	#N/A	#N/A	CAT1		0	0	0	0	0	0	0	0	1	0	0	1														0.3	0.3
122-14-5	-	-	Fenitrothion	#N/A	#N/A	#N/A	#N/A	#N/A	122-14-5	#N/A	#N/A	#N/A	#N/A	#N/A	#N/A	#N/A	#N/A	#N/A	CAT1		0	0	0	0	0	0	0	0	1	0	0	1														0.3	0.3
12427-38-2	-	-	Maneb	#N/A	#N/A	#N/A	#N/A	#N/A	12427-38-2	#N/A	#N/A	#N/A	#N/A	#N/A	#N/A	#N/A	#N/A	#N/A	CAT1		0	0	0	0	0	0	0	0	1	0	0	1														0.3	0.3
12642-23-8	-	-	PCT Aroclor 5442	#N/A	#N/A	#N/A	#N/A	#N/A	12642-23-8	#N/A	#N/A	#N/A	#N/A	#N/A	#N/A	#N/A	#N/A	#N/A	CAT1		0	0	0	0	0	0	0	0	1	0	0	1														0.3	0.3
12672-29-6	-	-	PCB Aroclor 1248	#N/A	#N/A	#N/A	#N/A	#N/A	12672-29-6	#N/A	#N/A	#N/A	#N/A	#N/A	#N/A	#N/A	#N/A	#N/A	CAT1		0	0	0	0	0	0	0	0	1	0	0	1														0.3	0.3
12789-03-6	-	-	Chlordane	#N/A	#N/A	#N/A	#N/A	#N/A	12789-03-6	#N/A	#N/A	#N/A	#N/A	#N/A	#N/A	#N/A	#N/A	#N/A	CAT1		0	0	0	0	0	0	0	0	1	0	0	1														0.3	0.3
13049-13-3	-	-	4,4'-Dihydroxy-3,3',5,5'-tetrachlorobiphenyl	#N/A	#N/A	#N/A	#N/A	#N/A	13049-13-3	#N/A	#N/A	#N/A	#N/A	#N/A	#N/A	#N/A	#N/A	#N/A	CAT1		0	0	0	0	0	0	0	0	1	0	0	1														0.3	0.3
131-70-4	-	-	Mono-n-butylphthalate	#N/A	#N/A	#N/A	#N/A	#N/A	131-70-4	#N/A	#N/A	#N/A	#N/A	#N/A	#N/A	#N/A	#N/A	#N/A	CAT1		0	0	0	0	0	0	0	0	1	0	0	1														0.3	0.3
1336-36-3	-	-	PCB	#N/A	#N/A	#N/A	#N/A	#N/A	1336-36-3	#N/A	#N/A	#N/A	#N/A	#N/A	#N/A	#N/A	#N/A	#N/A	CAT1		0	0	0	0	0	0	0	0	1	0	0	1														0.3	0.3
135821-03-3	-	-	1,4:7,10-Dimethanodibenzo[a,e]cyclooctene, 1,2,3,4,7,8,9,10,13,13,14,14-dodecachloro-1,4,4a,5,6,6a,7,10,10a,11,12,12a-dodecahydro-, (1R,4S,4aS,6aR,7R,10S,10aS,12aR)-rel-	#N/A	#N/A	135821-03-3	#N/A	#N/A	#N/A	#N/A	#N/A	#N/A	#N/A	#N/A	vPvB (Article 57e)	#N/A	#N/A	#N/A	#N/A		0	1	0	0	0	0	0	0	0	0	0	1														1	1
135821-74-8	-	-	1,4:7,10-Dimethanodibenzo[a,e]cyclooctene, 1,2,3,4,7,8,9,10,13,13,14,14-dodecachloro-1,4,4a,5,6,6a,7,10,10a,11,12,12a-dodecahydro-, (1R,4S,4aS,6aS,7S,10R,10aR,12aR)-rel-	#N/A	#N/A	135821-74-8	#N/A	#N/A	#N/A	#N/A	#N/A	#N/A	#N/A	#N/A	vPvB (Article 57e)	#N/A	#N/A	#N/A	#N/A		0	1	0	0	0	0	0	0	0	0	0	1														1	1
13593-03-8	-	-	Quinalphos = Chinalphos	#N/A	#N/A	#N/A	#N/A	#N/A	13593-03-8	#N/A	#N/A	#N/A	#N/A	#N/A	#N/A	#N/A	#N/A	#N/A	CAT1		0	0	0	0	0	0	0	0	1	0	0	1														0.3	0.3
142731-63-3	-	-	4-(3,6-Dimethyl-3-heptyl)phenol	142731-63-3	#N/A	#N/A	#N/A	#N/A	#N/A	Nonylphenol is an endocrine disruptor (cat 1) and is classified as possibly toxic for reproduction (R3), It is also persistent and bio-accumulative and it has been found in humans and the environment.	Official classification missing - 57f substance	#N/A	#N/A	#N/A	#N/A	#N/A	#N/A	#N/A	#N/A		0	0	0	0	0	0	0	1	0	0	0	1														0.3	0.3
143-50-0	-	-	Kepone (Chlordecone)	#N/A	#N/A	#N/A	#N/A	#N/A	143-50-0	#N/A	#N/A	#N/A	#N/A	#N/A	#N/A	#N/A	#N/A	#N/A	CAT1		0	0	0	0	0	0	0	0	1	0	0	1														0.3	0.3
1461-25-2	-	-	Tetrabutyltin (TTBT)	#N/A	#N/A	#N/A	#N/A	#N/A	1461-25-2	#N/A	#N/A	#N/A	#N/A	#N/A	#N/A	#N/A	#N/A	#N/A	CAT1		0	0	0	0	0	0	0	0	1	0	0	1														0.3	0.3
1478-61-1	-	-	Bisphenol AF	#N/A	#N/A	#N/A	#N/A	#N/A	1478-61-1	#N/A	#N/A	#N/A	#N/A	#N/A	#N/A	#N/A	#N/A	#N/A	CAT1		0	0	0	0	0	0	0	0	1	0	0	1														0.3	0.3
14835-94-0	-	-	o,p'-DDMU	#N/A	#N/A	#N/A	#N/A	#N/A	14835-94-0	#N/A	#N/A	#N/A	#N/A	#N/A	#N/A	#N/A	#N/A	#N/A	CAT1		0	0	0	0	0	0	0	0	1	0	0	1														0.3	0.3
14962-28-8	-	-	4-Hydroxy-2',4',6'-trichlorobiphenyl	#N/A	#N/A	#N/A	#N/A	#N/A	14962-28-8	#N/A	#N/A	#N/A	#N/A	#N/A	#N/A	#N/A	#N/A	#N/A	CAT1		0	0	0	0	0	0	0	0	1	0	0	1														0.3	0.3
156609-10-8	-	-	4-TERT-NONYLPHENOLDIETHOXYLATE	156609-10-8	#N/A	#N/A	#N/A	#N/A	#N/A	Nonylphenol etoxilates are categorized as endocrine disruptors (cat 1), they are the precursors of Nonyl phenol which is a persistent and bio-accumulative substance. It has been found in the environment.	Official classification missing - 57f substance	#N/A	#N/A	#N/A	#N/A	#N/A	#N/A	#N/A	#N/A		0	0	0	0	0	0	0	1	0	0	0	1														0.3	0.3
1582-09-8	-	-	Trifluralin	#N/A	#N/A	#N/A	#N/A	#N/A	1582-09-8	#N/A	#N/A	#N/A	#N/A	#N/A	#N/A	#N/A	#N/A	#N/A	CAT1		0	0	0	0	0	0	0	0	1	0	0	1														0.3	0.3
15972-60-8	-	-	Alachlor	#N/A	#N/A	#N/A	#N/A	#N/A	15972-60-8	#N/A	#N/A	#N/A	#N/A	#N/A	#N/A	#N/A	#N/A	#N/A	CAT1		0	0	0	0	0	0	0	0	1	0	0	1														0.3	0.3
1689-83-4	-	-	Ioxynil	#N/A	#N/A	#N/A	#N/A	#N/A	1689-83-4	#N/A	#N/A	#N/A	#N/A	#N/A	#N/A	#N/A	#N/A	#N/A	CAT1		0	0	0	0	0	0	0	0	1	0	0	1														0.3	0.3
1746-01-6	-	-	2,3,7,8-Tetrachlorodibenzo-p-dioxin (2,3,7,8-TCDD)	#N/A	#N/A	#N/A	#N/A	#N/A	1746-01-6	#N/A	#N/A	#N/A	#N/A	#N/A	#N/A	#N/A	#N/A	#N/A	CAT1		0	0	0	0	0	0	0	0	1	0	0	1														0.3	0.3
1806-26-4	-	-	Phenol, 4-octyl-	#N/A	#N/A	#N/A	#N/A	#N/A	1806-26-4	#N/A	#N/A	#N/A	#N/A	#N/A	#N/A	#N/A	#N/A	#N/A	CAT1		0	0	0	0	0	0	0	0	1	0	0	1														0.3	0.3
1824346-00-0	-	-	Phenol, 4-[2methyl-1-(1- methylethyl)prop yl]-	1824346-00-0	#N/A	#N/A	#N/A	#N/A	#N/A	Substance is concluded to be an endocrine disruptor SVHC by ECHA Member State Committee.	Official classification missing - 57f substance	#N/A	#N/A	#N/A	#N/A	#N/A	#N/A	#N/A	#N/A		0	0	0	0	0	0	0	1	0	0	0	1														0.3	0.3
1836-75-5	-	-	Nitrofen	#N/A	#N/A	#N/A	#N/A	#N/A	1836-75-5	#N/A	#N/A	#N/A	#N/A	#N/A	#N/A	#N/A	#N/A	#N/A	CAT1		0	0	0	0	0	0	0	0	1	0	0	1														0.3	0.3
186825-36-5	-	-	4-(3,5-Dimethyl-3-heptyl)phenol	186825-36-5	#N/A	#N/A	#N/A	#N/A	#N/A	Nonylphenol is an endocrine disruptor (cat 1) and is classified as possibly toxic for reproduction (R3), It is also persistent and bio-accumulative and it has been found in humans and the environment.	Official classification missing - 57f substance	#N/A	#N/A	#N/A	#N/A	#N/A	#N/A	#N/A	#N/A		0	0	0	0	0	0	0	1	0	0	0	1														0.3	0.3
1912-24-9	-	-	Atrazine	#N/A	#N/A	#N/A	#N/A	#N/A	1912-24-9	#N/A	#N/A	#N/A	#N/A	#N/A	#N/A	#N/A	#N/A	#N/A	CAT1		0	0	0	0	0	0	0	0	1	0	0	1														0.3	0.3
21087-64-9	-	-	Metribuzin	#N/A	#N/A	#N/A	#N/A	#N/A	21087-64-9	#N/A	#N/A	#N/A	#N/A	#N/A	#N/A	#N/A	#N/A	#N/A	CAT1		0	0	0	0	0	0	0	0	1	0	0	1														0.3	0.3
2155-70-6	-	-	Tributyl[(2-methyl-1-oxo-2-propenyl)oxy]stannane	#N/A	#N/A	#N/A	#N/A	#N/A	2155-70-6	#N/A	#N/A	#N/A	#N/A	#N/A	#N/A	#N/A	#N/A	#N/A	CAT1		0	0	0	0	0	0	0	0	1	0	0	1														0.3	0.3
2279-76-7	-	-	Tri-n-propyltin (TPrT)	#N/A	#N/A	#N/A	#N/A	#N/A	2279-76-7	#N/A	#N/A	#N/A	#N/A	#N/A	#N/A	#N/A	#N/A	#N/A	CAT1		0	0	0	0	0	0	0	0	1	0	0	1														0.3	0.3
2385-85-5	-	-	Mirex	#N/A	#N/A	#N/A	#N/A	#N/A	2385-85-5	#N/A	#N/A	#N/A	#N/A	#N/A	#N/A	#N/A	#N/A	#N/A	CAT1		0	0	0	0	0	0	0	0	1	0	0	1														0.3	0.3
24124-25-2	-	-	Stannane, tributyl[(1-oxo-9,12-octadecad	#N/A	#N/A	#N/A	#N/A	#N/A	24124-25-2	#N/A	#N/A	#N/A	#N/A	#N/A	#N/A	#N/A	#N/A	#N/A	CAT1		0	0	0	0	0	0	0	0	1	0	0	1														0.3	0.3
2437-79-8	-	-	PCB 47 (2,2',4,4'-Tetrachlorobiphenyl)	#N/A	#N/A	#N/A	#N/A	#N/A	2437-79-8	#N/A	#N/A	#N/A	#N/A	#N/A	#N/A	#N/A	#N/A	#N/A	CAT1		0	0	0	0	0	0	0	0	1	0	0	1														0.3	0.3
25036-25-3	-	-	2,2'-bis(2-(2,3-epoxypropoxy)phenyl)-propane	#N/A	#N/A	#N/A	#N/A	#N/A	25036-25-3	#N/A	#N/A	#N/A	#N/A	#N/A	#N/A	#N/A	#N/A	#N/A	CAT1		0	0	0	0	0	0	0	0	1	0	0	1														0.3	0.3
26239-64-5	-	-	Stannane, tributyl[[[1,2,3,4,4a,4b,5,6,1	#N/A	#N/A	#N/A	#N/A	#N/A	26239-64-5	#N/A	#N/A	#N/A	#N/A	#N/A	#N/A	#N/A	#N/A	#N/A	CAT1		0	0	0	0	0	0	0	0	1	0	0	1														0.3	0.3
26354-18-7	-	-	2-propenoic acid, 2-methyl-, methyl ester = Stannane, tributylmeacrylate	#N/A	#N/A	#N/A	#N/A	#N/A	26354-18-7	#N/A	#N/A	#N/A	#N/A	#N/A	#N/A	#N/A	#N/A	#N/A	CAT1		0	0	0	0	0	0	0	0	1	0	0	1														0.3	0.3
288864-02-8	-	-	Phenol, 4-tert- heptyl-	288864-02-8	#N/A	#N/A	#N/A	#N/A	#N/A	Substance is concluded to be an endocrine disruptor SVHC by ECHA Member State Committee.	Official classification missing - 57f substance	#N/A	#N/A	#N/A	#N/A	#N/A	#N/A	#N/A	#N/A		0	0	0	0	0	0	0	1	0	0	0	1														0.3	0.3
2971-22-4	-	-	1,1,1-Trichloro-2,2-bis(4-chlorophenyl)ethane	#N/A	#N/A	#N/A	#N/A	#N/A	2971-22-4	#N/A	#N/A	#N/A	#N/A	#N/A	#N/A	#N/A	#N/A	#N/A	CAT1		0	0	0	0	0	0	0	0	1	0	0	1														0.3	0.3
2971-36-0	-	-	Bis-OH-Methoxychlor = 1,1,1-trichloro-2,2-bis(4-hydroxyphenyl)ethane (HTPE)	#N/A	#N/A	#N/A	#N/A	#N/A	2971-36-0	#N/A	#N/A	#N/A	#N/A	#N/A	#N/A	#N/A	#N/A	#N/A	CAT1		0	0	0	0	0	0	0	0	1	0	0	1														0.3	0.3
30668-06-5	-	-	1,3-Dichloro-2,2-bis(4-methoxy-3-methylphenyl)propane	#N/A	#N/A	#N/A	#N/A	#N/A	30668-06-5	#N/A	#N/A	#N/A	#N/A	#N/A	#N/A	#N/A	#N/A	#N/A	CAT1		0	0	0	0	0	0	0	0	1	0	0	1														0.3	0.3
30784-27-1	-	-	Phenol, 4-(1- ethyl-1,2- dimethylpropyl)-	30784-27-1	#N/A	#N/A	#N/A	#N/A	#N/A	Substance is concluded to be an endocrine disruptor SVHC by ECHA Member State Committee.	Official classification missing - 57f substance	#N/A	#N/A	#N/A	#N/A	#N/A	#N/A	#N/A	#N/A		0	0	0	0	0	0	0	1	0	0	0	1														0.3	0.3
30784-31-7	-	-	Phenol, 4-(1,1- dimethylpentyl)-	30784-31-7	#N/A	#N/A	#N/A	#N/A	#N/A	Substance is concluded to be an endocrine disruptor SVHC by ECHA Member State Committee.	Official classification missing - 57f substance	#N/A	#N/A	#N/A	#N/A	#N/A	#N/A	#N/A	#N/A		0	0	0	0	0	0	0	1	0	0	0	1														0.3	0.3
30784-32-8	-	-	Phenol, 4-(1- ethyl-1- methylbutyl)-	30784-32-8	#N/A	#N/A	#N/A	#N/A	#N/A	Substance is concluded to be an endocrine disruptor SVHC by ECHA Member State Committee.	Official classification missing - 57f substance	#N/A	#N/A	#N/A	#N/A	#N/A	#N/A	#N/A	#N/A		0	0	0	0	0	0	0	1	0	0	0	1														0.3	0.3
3090-35-5	-	-	Stannane, tributyl[(1-oxo-9-octadecenyl)	#N/A	#N/A	#N/A	#N/A	#N/A	3090-35-5	#N/A	#N/A	#N/A	#N/A	#N/A	#N/A	#N/A	#N/A	#N/A	CAT1		0	0	0	0	0	0	0	0	1	0	0	1														0.3	0.3
31508-00-6	-	-	PCB 118 (2,3',4,4',5-pentachlorobiphenyl)	#N/A	#N/A	#N/A	#N/A	#N/A	31508-00-6	#N/A	#N/A	#N/A	#N/A	#N/A	#N/A	#N/A	#N/A	#N/A	CAT1		0	0	0	0	0	0	0	0	1	0	0	1														0.3	0.3
31631-13-7	-	-	Phenol, p-isononyl-, phosphite (3:1) (TNPP)	31631-13-7	#N/A	#N/A	#N/A	#N/A	#N/A	Substance is concluded to be an endocrine disruptor SVHC by ECHA Member State Committe when including = 0,1% 4-NonylPhenol.	Skin Sens. 1; Aquatic Acute 1; Aquatic Chronic 1	H317; H400; H410	#N/A	#N/A	#N/A	#N/A	#N/A	#N/A	#N/A		0	0	1	0	0	0	0	0	0	0	0	1														0.3	0.3
319-85-7	-	-	Beta-HCH	#N/A	#N/A	#N/A	#N/A	#N/A	319-85-7	#N/A	#N/A	#N/A	#N/A	#N/A	#N/A	#N/A	#N/A	#N/A	CAT1		0	0	0	0	0	0	0	0	1	0	0	1														0.3	0.3
32598-13-3	-	-	PCB 77 (3,3',4,4'-Tetrachlorobiphenyl)	#N/A	#N/A	#N/A	#N/A	#N/A	32598-13-3	#N/A	#N/A	#N/A	#N/A	#N/A	#N/A	#N/A	#N/A	#N/A	CAT1		0	0	0	0	0	0	0	0	1	0	0	1														0.3	0.3
32774-16-6	-	-	PCB 169 (3,3',4,4',5,5'-Hexachlorobiphenyl)	#N/A	#N/A	#N/A	#N/A	#N/A	32774-16-6	#N/A	#N/A	#N/A	#N/A	#N/A	#N/A	#N/A	#N/A	#N/A	CAT1		0	0	0	0	0	0	0	0	1	0	0	1														0.3	0.3
32809-16-8	-	-	Procymidon	#N/A	#N/A	#N/A	#N/A	#N/A	32809-16-8	#N/A	#N/A	#N/A	#N/A	#N/A	#N/A	#N/A	#N/A	#N/A	CAT1		0	0	0	0	0	0	0	0	1	0	0	1														0.3	0.3
330-55-2	-	-	Linuron (Lorox)	#N/A	#N/A	#N/A	#N/A	#N/A	330-55-2	#N/A	#N/A	#N/A	#N/A	#N/A	#N/A	#N/A	#N/A	#N/A	CAT1		0	0	0	0	0	0	0	0	1	0	0	1														0.3	0.3
33104-11-9	-	-	Phenol, 4-(1,1,3- trimethylbutyl)-	33104-11-9	#N/A	#N/A	#N/A	#N/A	#N/A	Substance is concluded to be an endocrine disruptor SVHC by ECHA Member State Committee.	Official classification missing - 57f substance	#N/A	#N/A	#N/A	#N/A	#N/A	#N/A	#N/A	#N/A		0	0	0	0	0	0	0	1	0	0	0	1														0.3	0.3
34166-38-6	-	-	2-[2-[2-[2-[2-[2-(4-nonylphenoxy)ethoxy]ethoxy]ethoxy]ethoxy]ethoxy]ethanol	34166-38-6	#N/A	#N/A	#N/A	#N/A	#N/A	Nonylphenol etoxilates are categorized as endocrine disruptors (cat 1), they are the precursors of Nonyl phenol which is a persistent and bio-accumulative substance. It has been found in the environment.	Official classification missing - 57f substance	#N/A	#N/A	#N/A	#N/A	#N/A	#N/A	#N/A	#N/A		0	0	0	0	0	0	0	1	0	0	0	1														0.3	0.3
3424-82-6	-	-	o,p'-DDE	#N/A	#N/A	#N/A	#N/A	#N/A	3424-82-6	#N/A	#N/A	#N/A	#N/A	#N/A	#N/A	#N/A	#N/A	#N/A	CAT1		0	0	0	0	0	0	0	0	1	0	0	1														0.3	0.3
34256-82-1	-	-	Acetochlor	#N/A	#N/A	#N/A	#N/A	#N/A	34256-82-1	#N/A	#N/A	#N/A	#N/A	#N/A	#N/A	#N/A	#N/A	#N/A	CAT1		0	0	0	0	0	0	0	0	1	0	0	1														0.3	0.3
35065-27-1	-	-	PCB 153 (2,2',4,4',5,5'-Hexachlorobiphenyl)	#N/A	#N/A	#N/A	#N/A	#N/A	35065-27-1	#N/A	#N/A	#N/A	#N/A	#N/A	#N/A	#N/A	#N/A	#N/A	CAT1		0	0	0	0	0	0	0	0	1	0	0	1														0.3	0.3
3563-45-9	-	-	1,1,1,2-Tetrachloro-2,2-bis(4-chlorophenyl)ethane (tetrachloro DDT)	#N/A	#N/A	#N/A	#N/A	#N/A	3563-45-9	#N/A	#N/A	#N/A	#N/A	#N/A	#N/A	#N/A	#N/A	#N/A	CAT1		0	0	0	0	0	0	0	0	1	0	0	1														0.3	0.3
35693-99-3	-	-	PCB 52 (2,2';5,5'-Tetrachlorobiphenyl)	#N/A	#N/A	#N/A	#N/A	#N/A	35693-99-3	#N/A	#N/A	#N/A	#N/A	#N/A	#N/A	#N/A	#N/A	#N/A	CAT1		0	0	0	0	0	0	0	0	1	0	0	1														0.3	0.3
36631-23-9	-	-	Stannane, tributyl = Tributyltin naphtalate	#N/A	#N/A	#N/A	#N/A	#N/A	36631-23-9	#N/A	#N/A	#N/A	#N/A	#N/A	#N/A	#N/A	#N/A	#N/A	CAT1		0	0	0	0	0	0	0	0	1	0	0	1														0.3	0.3
37680-65-2	-	-	PCB 18 (2,2',5-Trichlorobiphenyl)	#N/A	#N/A	#N/A	#N/A	#N/A	37680-65-2	#N/A	#N/A	#N/A	#N/A	#N/A	#N/A	#N/A	#N/A	#N/A	CAT1		0	0	0	0	0	0	0	0	1	0	0	1														0.3	0.3
37872-24-5	-	-	Phenol, 4-(1,1- diethylpropyl)-	37872-24-5	#N/A	#N/A	#N/A	#N/A	#N/A	Substance is concluded to be an endocrine disruptor SVHC by ECHA Member State Committee.	Official classification missing - 57f substance	#N/A	#N/A	#N/A	#N/A	#N/A	#N/A	#N/A	#N/A		0	0	0	0	0	0	0	1	0	0	0	1														0.3	0.3
38380-07-3	-	-	PCB 128 (2,2',3,3',4,4'-Hexachlorobiphenyl)	#N/A	#N/A	#N/A	#N/A	#N/A	38380-07-3	#N/A	#N/A	#N/A	#N/A	#N/A	#N/A	#N/A	#N/A	#N/A	CAT1		0	0	0	0	0	0	0	0	1	0	0	1														0.3	0.3
39765-80-5	-	-	Trans-Nonachlor	#N/A	#N/A	#N/A	#N/A	#N/A	39765-80-5	#N/A	#N/A	#N/A	#N/A	#N/A	#N/A	#N/A	#N/A	#N/A	CAT1		0	0	0	0	0	0	0	0	1	0	0	1														0.3	0.3
40321-76-4	-	-	1,2,3,7,8-Pentachlorodibenzodioxin	#N/A	#N/A	#N/A	#N/A	#N/A	40321-76-4	#N/A	#N/A	#N/A	#N/A	#N/A	#N/A	#N/A	#N/A	#N/A	CAT1		0	0	0	0	0	0	0	0	1	0	0	1														0.3	0.3
43216-70-2	-	-	3-OH-o,p'-DDT	#N/A	#N/A	#N/A	#N/A	#N/A	43216-70-2	#N/A	#N/A	#N/A	#N/A	#N/A	#N/A	#N/A	#N/A	#N/A	CAT1		0	0	0	0	0	0	0	0	1	0	0	1														0.3	0.3
4342-30-7	-	-	Phenol, 2-[[(tributylstannyl)oxy]carbony	#N/A	#N/A	#N/A	#N/A	#N/A	4342-30-7	#N/A	#N/A	#N/A	#N/A	#N/A	#N/A	#N/A	#N/A	#N/A	CAT1		0	0	0	0	0	0	0	0	1	0	0	1														0.3	0.3
4342-36-3	-	-	Stannane, (benzoyloxy)tributyl-	#N/A	#N/A	#N/A	#N/A	#N/A	4342-36-3	#N/A	#N/A	#N/A	#N/A	#N/A	#N/A	#N/A	#N/A	#N/A	CAT1		0	0	0	0	0	0	0	0	1	0	0	1														0.3	0.3
4376-20-9	-	-	Mono 2 ethyl hexylphthalate (MEHP)	#N/A	#N/A	#N/A	#N/A	#N/A	4376-20-9	#N/A	#N/A	#N/A	#N/A	#N/A	#N/A	#N/A	#N/A	#N/A	CAT1		0	0	0	0	0	0	0	0	1	0	0	1														0.3	0.3
4400-06-0	-	-	4-Hydroxy-3,4',5-trichlorobiphenyl	#N/A	#N/A	#N/A	#N/A	#N/A	4400-06-0	#N/A	#N/A	#N/A	#N/A	#N/A	#N/A	#N/A	#N/A	#N/A	CAT1		0	0	0	0	0	0	0	0	1	0	0	1														0.3	0.3
4782-29-0	-	-	Stannane, [1,2-phenylenebis(carbonyloxy)	#N/A	#N/A	#N/A	#N/A	#N/A	4782-29-0	#N/A	#N/A	#N/A	#N/A	#N/A	#N/A	#N/A	#N/A	#N/A	CAT1		0	0	0	0	0	0	0	0	1	0	0	1														0.3	0.3
50-18-0	-	-	Cyclophosphamide	#N/A	#N/A	#N/A	#N/A	#N/A	50-18-0	#N/A	#N/A	#N/A	#N/A	#N/A	#N/A	#N/A	#N/A	#N/A	CAT1		0	0	0	0	0	0	0	0	1	0	0	1														0.3	0.3
50-29-3	-	-	DDT (technical) = clofenotane	#N/A	#N/A	#N/A	#N/A	#N/A	50-29-3	#N/A	#N/A	#N/A	#N/A	#N/A	#N/A	#N/A	#N/A	#N/A	CAT1		0	0	0	0	0	0	0	0	1	0	0	1														0.3	0.3
50-29-3	-	-	p,p'-DDT = clofenotane	#N/A	#N/A	#N/A	#N/A	#N/A	50-29-3	#N/A	#N/A	#N/A	#N/A	#N/A	#N/A	#N/A	#N/A	#N/A	CAT1		0	0	0	0	0	0	0	0	1	0	0	1														0.3	0.3
50471-44-8	-	-	Vinclozolin	#N/A	#N/A	#N/A	#N/A	#N/A	50471-44-8	#N/A	#N/A	#N/A	#N/A	#N/A	#N/A	#N/A	#N/A	#N/A	CAT1		0	0	0	0	0	0	0	0	1	0	0	1														0.3	0.3
50585-41-6	-	-	2,3,7,8-TeBDD	#N/A	#N/A	#N/A	#N/A	#N/A	50585-41-6	#N/A	#N/A	#N/A	#N/A	#N/A	#N/A	#N/A	#N/A	#N/A	CAT1		0	0	0	0	0	0	0	0	1	0	0	1														0.3	0.3
5103-73-1	-	-	Cis-Nonachlor	#N/A	#N/A	#N/A	#N/A	#N/A	5103-73-1	#N/A	#N/A	#N/A	#N/A	#N/A	#N/A	#N/A	#N/A	#N/A	CAT1		0	0	0	0	0	0	0	0	1	0	0	1														0.3	0.3
52918-63-5	-	-	Deltamethrin	#N/A	#N/A	#N/A	#N/A	#N/A	52918-63-5	#N/A	#N/A	#N/A	#N/A	#N/A	#N/A	#N/A	#N/A	#N/A	CAT1		0	0	0	0	0	0	0	0	1	0	0	1														0.3	0.3
53-19-0	-	-	o,p'-DDD	#N/A	#N/A	#N/A	#N/A	#N/A	53-19-0	#N/A	#N/A	#N/A	#N/A	#N/A	#N/A	#N/A	#N/A	#N/A	CAT1		0	0	0	0	0	0	0	0	1	0	0	1														0.3	0.3
53469-21-9	-	-	PCB Aroclor 1242	#N/A	#N/A	#N/A	#N/A	#N/A	53469-21-9	#N/A	#N/A	#N/A	#N/A	#N/A	#N/A	#N/A	#N/A	#N/A	CAT1		0	0	0	0	0	0	0	0	1	0	0	1														0.3	0.3
53905-33-2	-	-	4-Hydroxy-2,2',5'-trichlorobiphenyl	#N/A	#N/A	#N/A	#N/A	#N/A	53905-33-2	#N/A	#N/A	#N/A	#N/A	#N/A	#N/A	#N/A	#N/A	#N/A	CAT1		0	0	0	0	0	0	0	0	1	0	0	1														0.3	0.3
5466-77-3	-	-	2-ethyl-hexyl-4-methoxycinnamate	#N/A	#N/A	#N/A	#N/A	#N/A	5466-77-3	#N/A	#N/A	#N/A	#N/A	#N/A	#N/A	#N/A	#N/A	#N/A	CAT1		0	0	0	0	0	0	0	0	1	0	0	1														0.3	0.3
54991-93-4	-	-	Clophen A30	#N/A	#N/A	#N/A	#N/A	#N/A	54991-93-4	#N/A	#N/A	#N/A	#N/A	#N/A	#N/A	#N/A	#N/A	#N/A	CAT1		0	0	0	0	0	0	0	0	1	0	0	1														0.3	0.3
55702-46-0	-	-	PCB 21 (2,3,4-Trichlorobiphenyl)	#N/A	#N/A	#N/A	#N/A	#N/A	55702-46-0	#N/A	#N/A	#N/A	#N/A	#N/A	#N/A	#N/A	#N/A	#N/A	CAT1		0	0	0	0	0	0	0	0	1	0	0	1														0.3	0.3
56-49-5	-	-	3-Methylcholanthrene	#N/A	#N/A	#N/A	#N/A	#N/A	56-49-5	#N/A	#N/A	#N/A	#N/A	#N/A	#N/A	#N/A	#N/A	#N/A	CAT1		0	0	0	0	0	0	0	0	1	0	0	1														0.3	0.3
56614-97-2	-	-	3,9-Dihydroxybenz(a)anthracene	#N/A	#N/A	#N/A	#N/A	#N/A	56614-97-2	#N/A	#N/A	#N/A	#N/A	#N/A	#N/A	#N/A	#N/A	#N/A	CAT1		0	0	0	0	0	0	0	0	1	0	0	1														0.3	0.3
57117-31-4	-	-	2,3,4,7,8-Pentachlorodibenzofuran (2,3,4,7,8-PeCDF)	#N/A	#N/A	#N/A	#N/A	#N/A	57117-31-4	#N/A	#N/A	#N/A	#N/A	#N/A	#N/A	#N/A	#N/A	#N/A	CAT1		0	0	0	0	0	0	0	0	1	0	0	1														0.3	0.3
57-74-9	-	-	Chlordane (cis- and trans-)	#N/A	#N/A	#N/A	#N/A	#N/A	57-74-9	#N/A	#N/A	#N/A	#N/A	#N/A	#N/A	#N/A	#N/A	#N/A	CAT1		0	0	0	0	0	0	0	0	1	0	0	1														0.3	0.3
57-97-6	-	-	7,12-Dimethyl-1,2-benz(a)anthracene	#N/A	#N/A	#N/A	#N/A	#N/A	57-97-6	#N/A	#N/A	#N/A	#N/A	#N/A	#N/A	#N/A	#N/A	#N/A	CAT1		0	0	0	0	0	0	0	0	1	0	0	1														0.3	0.3
58-89-9	-	-	Gamma-HCH (Lindane)	#N/A	#N/A	#N/A	#N/A	#N/A	58-89-9	#N/A	#N/A	#N/A	#N/A	#N/A	#N/A	#N/A	#N/A	#N/A	CAT1		0	0	0	0	0	0	0	0	1	0	0	1														0.3	0.3
60168-88-9	-	-	Fenarimol	#N/A	#N/A	#N/A	#N/A	#N/A	60168-88-9	#N/A	#N/A	#N/A	#N/A	#N/A	#N/A	#N/A	#N/A	#N/A	CAT1		0	0	0	0	0	0	0	0	1	0	0	1														0.3	0.3
608-73-1	-	-	Hexachlorocyclohexane = HCH mixed	#N/A	#N/A	#N/A	#N/A	#N/A	608-73-1	#N/A	#N/A	#N/A	#N/A	#N/A	#N/A	#N/A	#N/A	#N/A	CAT1		0	0	0	0	0	0	0	0	1	0	0	1														0.3	0.3
608-93-5	-	-	Pentachlorobenzene	#N/A	#N/A	#N/A	#N/A	#N/A	608-93-5	#N/A	#N/A	#N/A	#N/A	#N/A	#N/A	#N/A	#N/A	#N/A	CAT1		0	0	0	0	0	0	0	0	1	0	0	1														0.3	0.3
6164-98-3	-	-	Chlordimeform	#N/A	#N/A	#N/A	#N/A	#N/A	6164-98-3	#N/A	#N/A	#N/A	#N/A	#N/A	#N/A	#N/A	#N/A	#N/A	CAT1		0	0	0	0	0	0	0	0	1	0	0	1														0.3	0.3
61-82-5	-	-	Amitrol = Aminotriazol	#N/A	#N/A	#N/A	#N/A	#N/A	61-82-5	#N/A	#N/A	#N/A	#N/A	#N/A	#N/A	#N/A	#N/A	#N/A	CAT1		0	0	0	0	0	0	0	0	1	0	0	1														0.3	0.3
63-25-2	-	-	Carbaryl	#N/A	#N/A	#N/A	#N/A	#N/A	63-25-2	#N/A	#N/A	#N/A	#N/A	#N/A	#N/A	#N/A	#N/A	#N/A	CAT1		0	0	0	0	0	0	0	0	1	0	0	1														0.3	0.3
6465-71-0	-	-	phenol, 4-(1- propylbutyl)-	6465-71-0	#N/A	#N/A	#N/A	#N/A	#N/A	Substance is concluded to be an endocrine disruptor SVHC by ECHA Member State Committee.	Official classification missing - 57f substance	#N/A	#N/A	#N/A	#N/A	#N/A	#N/A	#N/A	#N/A		0	0	0	0	0	0	0	1	0	0	0	1														0.3	0.3
6465-74-3	-	-	phenol, 4-(1- ethylpentyl)-	6465-74-3	#N/A	#N/A	#N/A	#N/A	#N/A	Substance is concluded to be an endocrine disruptor SVHC by ECHA Member State Committee.	Official classification missing - 57f substance	#N/A	#N/A	#N/A	#N/A	#N/A	#N/A	#N/A	#N/A		0	0	0	0	0	0	0	1	0	0	0	1														0.3	0.3
65148-72-3	-	-	4-MeO-o,p'-DDT	#N/A	#N/A	#N/A	#N/A	#N/A	65148-72-3	#N/A	#N/A	#N/A	#N/A	#N/A	#N/A	#N/A	#N/A	#N/A	CAT1		0	0	0	0	0	0	0	0	1	0	0	1														0.3	0.3
65148-73-4	-	-	5-OH-o,p'-DDT	#N/A	#N/A	#N/A	#N/A	#N/A	65148-73-4	#N/A	#N/A	#N/A	#N/A	#N/A	#N/A	#N/A	#N/A	#N/A	CAT1		0	0	0	0	0	0	0	0	1	0	0	1														0.3	0.3
65148-74-5	-	-	5-MeO-o,p'-DDT	#N/A	#N/A	#N/A	#N/A	#N/A	65148-74-5	#N/A	#N/A	#N/A	#N/A	#N/A	#N/A	#N/A	#N/A	#N/A	CAT1		0	0	0	0	0	0	0	0	1	0	0	1														0.3	0.3
65148-75-6	-	-	5-MeO-o,p'-DDD	#N/A	#N/A	#N/A	#N/A	#N/A	65148-75-6	#N/A	#N/A	#N/A	#N/A	#N/A	#N/A	#N/A	#N/A	#N/A	CAT1		0	0	0	0	0	0	0	0	1	0	0	1														0.3	0.3
65148-80-3	-	-	3-MeO-o,p'-DDE	#N/A	#N/A	#N/A	#N/A	#N/A	65148-80-3	#N/A	#N/A	#N/A	#N/A	#N/A	#N/A	#N/A	#N/A	#N/A	CAT1		0	0	0	0	0	0	0	0	1	0	0	1														0.3	0.3
65148-81-4	-	-	4-MeO-o,p'-DDE	#N/A	#N/A	#N/A	#N/A	#N/A	65148-81-4	#N/A	#N/A	#N/A	#N/A	#N/A	#N/A	#N/A	#N/A	#N/A	CAT1		0	0	0	0	0	0	0	0	1	0	0	1														0.3	0.3
65148-82-5	-	-	5-MeO-o,p'-DDE	#N/A	#N/A	#N/A	#N/A	#N/A	65148-82-5	#N/A	#N/A	#N/A	#N/A	#N/A	#N/A	#N/A	#N/A	#N/A	CAT1		0	0	0	0	0	0	0	0	1	0	0	1														0.3	0.3
65148-83-6	-	-	o,p'-DDA-glycinat = N-[(2-chlorophenyl)(4-chlorophenyl)acettyl]glycin	#N/A	#N/A	#N/A	#N/A	#N/A	65148-83-6	#N/A	#N/A	#N/A	#N/A	#N/A	#N/A	#N/A	#N/A	#N/A	CAT1		0	0	0	0	0	0	0	0	1	0	0	1														0.3	0.3
67651-34-7	-	-	4-Hydroxy-2',3',4',5'-tetrachlorobiphenyl	#N/A	#N/A	#N/A	#N/A	#N/A	67651-34-7	#N/A	#N/A	#N/A	#N/A	#N/A	#N/A	#N/A	#N/A	#N/A	CAT1		0	0	0	0	0	0	0	0	1	0	0	1														0.3	0.3
67651-37-0	-	-	3-Hydroxy-2',3',4',5'-tetrachlorobiphenyl	#N/A	#N/A	#N/A	#N/A	#N/A	67651-37-0	#N/A	#N/A	#N/A	#N/A	#N/A	#N/A	#N/A	#N/A	#N/A	CAT1		0	0	0	0	0	0	0	0	1	0	0	1														0.3	0.3
6863-24-7	-	-	phenol, 4-(1- methylhexyl)-	6863-24-7	#N/A	#N/A	#N/A	#N/A	#N/A	Substance is concluded to be an endocrine disruptor SVHC by ECHA Member State Committee.	Official classification missing - 57f substance	#N/A	#N/A	#N/A	#N/A	#N/A	#N/A	#N/A	#N/A		0	0	0	0	0	0	0	1	0	0	0	1														0.3	0.3
69-72-7	-	-	Salicylic acid	#N/A	#N/A	#N/A	#N/A	#N/A	69-72-7	#N/A	#N/A	#N/A	#N/A	#N/A	#N/A	#N/A	#N/A	#N/A	CAT1		0	0	0	0	0	0	0	0	1	0	0	1														0.3	0.3
7012-37-5	-	-	PCB 28 (2,4,4'-trichlorobiphenyl)	#N/A	#N/A	#N/A	#N/A	#N/A	7012-37-5	#N/A	#N/A	#N/A	#N/A	#N/A	#N/A	#N/A	#N/A	#N/A	CAT1		0	0	0	0	0	0	0	0	1	0	0	1														0.3	0.3
7099-43-6	-	-	5,6-Cyclopento-1,2-benzanthracene	#N/A	#N/A	#N/A	#N/A	#N/A	7099-43-6	#N/A	#N/A	#N/A	#N/A	#N/A	#N/A	#N/A	#N/A	#N/A	CAT1		0	0	0	0	0	0	0	0	1	0	0	1														0.3	0.3
71945-81-8	-	-	Phenol, 4-(1,3- dimethylpentyl)-	71945-81-8	#N/A	#N/A	#N/A	#N/A	#N/A	Substance is concluded to be an endocrine disruptor SVHC by ECHA Member State Committee.	Official classification missing - 57f substance	#N/A	#N/A	#N/A	#N/A	#N/A	#N/A	#N/A	#N/A		0	0	0	0	0	0	0	1	0	0	0	1														0.3	0.3
72-33-3	-	-	Mestranol	#N/A	#N/A	#N/A	#N/A	#N/A	72-33-3	#N/A	#N/A	#N/A	#N/A	#N/A	#N/A	#N/A	#N/A	#N/A	CAT1		0	0	0	0	0	0	0	0	1	0	0	1														0.3	0.3
72-43-5	-	-	Methoxychlor	#N/A	#N/A	#N/A	#N/A	#N/A	72-43-5	#N/A	#N/A	#N/A	#N/A	#N/A	#N/A	#N/A	#N/A	#N/A	CAT1		0	0	0	0	0	0	0	0	1	0	0	1														0.3	0.3
72-43-5	-	-	p,p'-Methoxychlor	#N/A	#N/A	#N/A	#N/A	#N/A	72-43-5	#N/A	#N/A	#N/A	#N/A	#N/A	#N/A	#N/A	#N/A	#N/A	CAT1		0	0	0	0	0	0	0	0	1	0	0	1														0.3	0.3
72-54-8	-	-	p,p'-DDD	#N/A	#N/A	#N/A	#N/A	#N/A	72-54-8	#N/A	#N/A	#N/A	#N/A	#N/A	#N/A	#N/A	#N/A	#N/A	CAT1		0	0	0	0	0	0	0	0	1	0	0	1														0.3	0.3
72-55-9	-	-	p,p'-DDE	#N/A	#N/A	#N/A	#N/A	#N/A	72-55-9	#N/A	#N/A	#N/A	#N/A	#N/A	#N/A	#N/A	#N/A	#N/A	CAT1		0	0	0	0	0	0	0	0	1	0	0	1														0.3	0.3
72861-06-4	-	-	Phenol, 4(1,1,2,2tetramethylpropy l)-	72861-06-4	#N/A	#N/A	#N/A	#N/A	#N/A	Substance is concluded to be an endocrine disruptor SVHC by ECHA Member State Committee.	Official classification missing - 57f substance	#N/A	#N/A	#N/A	#N/A	#N/A	#N/A	#N/A	#N/A		0	0	0	0	0	0	0	1	0	0	0	1														0.3	0.3
7400-08-0	-	-	p-Coumaric acid (PCA)	#N/A	#N/A	#N/A	#N/A	#N/A	7400-08-0	#N/A	#N/A	#N/A	#N/A	#N/A	#N/A	#N/A	#N/A	#N/A	CAT1		0	0	0	0	0	0	0	0	1	0	0	1														0.3	0.3
76253-60-6	-	-	Monomethyl — tetrachlorodiphenyl methane Trade name: Ugilec 141	#N/A	76253-60-6	#N/A	#N/A	#N/A	#N/A	#N/A	#N/A	#N/A	H400 H410	#N/A	#N/A	#N/A	#N/A	#N/A	#N/A		0	0	1	0	0	0	0	0	0	0	0	1														1	1
77-40-7	-	-	2,2-Bis(4-hydroxyphenyl)-n-butan = Bisphenol B	#N/A	#N/A	#N/A	#N/A	#N/A	77-40-7	#N/A	#N/A	#N/A	#N/A	#N/A	#N/A	#N/A	#N/A	#N/A	CAT1		0	0	0	0	0	0	0	0	1	0	0	1														0.3	0.3
789-02-6	-	-	o,p'-DDT	#N/A	#N/A	#N/A	#N/A	#N/A	789-02-6	#N/A	#N/A	#N/A	#N/A	#N/A	#N/A	#N/A	#N/A	#N/A	CAT1		0	0	0	0	0	0	0	0	1	0	0	1														0.3	0.3
8001-35-2	-	-	Toxaphene = Camphechlor	#N/A	#N/A	#N/A	#N/A	#N/A	8001-35-2	#N/A	#N/A	#N/A	#N/A	#N/A	#N/A	#N/A	#N/A	#N/A	CAT1		0	0	0	0	0	0	0	0	1	0	0	1														0.3	0.3
8068-44-8	-	-	Clophen A50	#N/A	#N/A	#N/A	#N/A	#N/A	8068-44-8	#N/A	#N/A	#N/A	#N/A	#N/A	#N/A	#N/A	#N/A	#N/A	CAT1		0	0	0	0	0	0	0	0	1	0	0	1														0.3	0.3
82657-04-3	-	-	Bifenthrin (@Talstar)	#N/A	#N/A	#N/A	#N/A	#N/A	82657-04-3	#N/A	#N/A	#N/A	#N/A	#N/A	#N/A	#N/A	#N/A	#N/A	CAT1		0	0	0	0	0	0	0	0	1	0	0	1														0.3	0.3
85-01-8	-	-	Phenanthrene	85-01-8	#N/A	85-01-8	#N/A	#N/A	#N/A	Substance is concluded to be a vPvB SVHC by ECHA Member State Committee.	0	#N/A	#N/A	#N/A	vPvB (Article 57e)	#N/A	#N/A	#N/A	#N/A		0	1	0	0	0	0	0	0	0	0	0	1														1	1
85409-17-2	-	-	Stannane, tributyl-, mono(naphthenoyloxy	#N/A	#N/A	#N/A	#N/A	#N/A	85409-17-2	#N/A	#N/A	#N/A	#N/A	#N/A	#N/A	#N/A	#N/A	#N/A	CAT1		0	0	0	0	0	0	0	0	1	0	0	1														0.3	0.3
854904-92-0	-	-	Phenol, 4-(1- ethyl-3- methylbutyl)-	854904-92-0	#N/A	#N/A	#N/A	#N/A	#N/A	Substance is concluded to be an endocrine disruptor SVHC by ECHA Member State Committee.	Official classification missing - 57f substance	#N/A	#N/A	#N/A	#N/A	#N/A	#N/A	#N/A	#N/A		0	0	0	0	0	0	0	1	0	0	0	1														0.3	0.3
854904-93-1	-	-	Phenol, 4-(1,2- dimethylpentyl)-	854904-93-1	#N/A	#N/A	#N/A	#N/A	#N/A	Substance is concluded to be an endocrine disruptor SVHC by ECHA Member State Committee.	Official classification missing - 57f substance	#N/A	#N/A	#N/A	#N/A	#N/A	#N/A	#N/A	#N/A		0	0	0	0	0	0	0	1	0	0	0	1														0.3	0.3
857629-71-1	-	-	Phenol, 4-(1,4- dimethylpentyl)-	857629-71-1	#N/A	#N/A	#N/A	#N/A	#N/A	Substance is concluded to be an endocrine disruptor SVHC by ECHA Member State Committee.	Official classification missing - 57f substance	#N/A	#N/A	#N/A	#N/A	#N/A	#N/A	#N/A	#N/A		0	0	0	0	0	0	0	1	0	0	0	1														0.3	0.3
861010-65-3	-	-	Phenol, 4-(1- ethyl-2,2- dimethylpropyl)-	861010-65-3	#N/A	#N/A	#N/A	#N/A	#N/A	Substance is concluded to be an endocrine disruptor SVHC by ECHA Member State Committee.	Official classification missing - 57f substance	#N/A	#N/A	#N/A	#N/A	#N/A	#N/A	#N/A	#N/A		0	0	0	0	0	0	0	1	0	0	0	1														0.3	0.3
861011-60-1	-	-	Phenol, 4-(1,1,2- trimethylbutyl)-	861011-60-1	#N/A	#N/A	#N/A	#N/A	#N/A	Substance is concluded to be an endocrine disruptor SVHC by ECHA Member State Committee.	Official classification missing - 57f substance	#N/A	#N/A	#N/A	#N/A	#N/A	#N/A	#N/A	#N/A		0	0	0	0	0	0	0	1	0	0	0	1														0.3	0.3
886-50-0	-	-	Terbutryn	#N/A	#N/A	#N/A	#N/A	#N/A	886-50-0	#N/A	#N/A	#N/A	#N/A	#N/A	#N/A	#N/A	#N/A	#N/A	CAT1		0	0	0	0	0	0	0	0	1	0	0	1														0.3	0.3
9006-42-2	-	-	Metiram (Metiram-complex)	#N/A	#N/A	#N/A	#N/A	#N/A	9006-42-2	#N/A	#N/A	#N/A	#N/A	#N/A	#N/A	#N/A	#N/A	#N/A	CAT1		0	0	0	0	0	0	0	0	1	0	0	1														0.3	0.3
900-95-8	-	-	Fentin acetate = triphenyltin acetate	#N/A	#N/A	#N/A	#N/A	#N/A	900-95-8	#N/A	#N/A	#N/A	#N/A	#N/A	#N/A	#N/A	#N/A	#N/A	CAT1		0	0	0	0	0	0	0	0	1	0	0	1														0.3	0.3
911370-98-4	-	-	Phenol, 4-(3- ethylpentyl)-	911370-98-4	#N/A	#N/A	#N/A	#N/A	#N/A	Substance is concluded to be an endocrine disruptor SVHC by ECHA Member State Committee.	Official classification missing - 57f substance	#N/A	#N/A	#N/A	#N/A	#N/A	#N/A	#N/A	#N/A		0	0	0	0	0	0	0	1	0	0	0	1														0.3	0.3
911371-06-7	-	-	Phenol, 4-(1,2,2- trimethylbutyl)-	911371-06-7	#N/A	#N/A	#N/A	#N/A	#N/A	Substance is concluded to be an endocrine disruptor SVHC by ECHA Member State Committee.	Official classification missing - 57f substance	#N/A	#N/A	#N/A	#N/A	#N/A	#N/A	#N/A	#N/A		0	0	0	0	0	0	0	1	0	0	0	1														0.3	0.3
911371-07-8	-	-	Phenol, 4-(1,3,3- trimethylbutyl)-	911371-07-8	#N/A	#N/A	#N/A	#N/A	#N/A	Substance is concluded to be an endocrine disruptor SVHC by ECHA Member State Committee.	Official classification missing - 57f substance	#N/A	#N/A	#N/A	#N/A	#N/A	#N/A	#N/A	#N/A		0	0	0	0	0	0	0	1	0	0	0	1														0.3	0.3
91465-08-6	-	-	Cyhalothrin (@Karate)	#N/A	#N/A	#N/A	#N/A	#N/A	91465-08-6	#N/A	#N/A	#N/A	#N/A	#N/A	#N/A	#N/A	#N/A	#N/A	CAT1		0	0	0	0	0	0	0	0	1	0	0	1														0.3	0.3
92-69-3	-	-	4-Hydroxybiphenyl = 4-Phenylphenol	#N/A	#N/A	#N/A	#N/A	#N/A	92-69-3	#N/A	#N/A	#N/A	#N/A	#N/A	#N/A	#N/A	#N/A	#N/A	CAT1		0	0	0	0	0	0	0	0	1	0	0	1														0.3	0.3
92-88-6	-	-	4,4'-Dihydroxybiphenyl = 4,4'-Biphenol	#N/A	#N/A	#N/A	#N/A	#N/A	92-88-6	#N/A	#N/A	#N/A	#N/A	#N/A	#N/A	#N/A	#N/A	#N/A	CAT1		0	0	0	0	0	0	0	0	1	0	0	1														0.3	0.3
94-82-6	-	-	2,4-dichlorophenoxybutyric acid = 2,4-DB	#N/A	#N/A	#N/A	#N/A	#N/A	94-82-6	#N/A	#N/A	#N/A	#N/A	#N/A	#N/A	#N/A	#N/A	#N/A	CAT1		0	0	0	0	0	0	0	0	1	0	0	1														0.3	0.3
95-76-1	-	-	3,4-Dichloroaniline	#N/A	#N/A	#N/A	#N/A	#N/A	95-76-1	#N/A	#N/A	#N/A	#N/A	#N/A	#N/A	#N/A	#N/A	#N/A	CAT1		0	0	0	0	0	0	0	0	1	0	0	1														0.3	0.3
99688-47-8	-	-	Monomethyl-dibromo-diphenyl methane bromobenzylbromotoluene, mixture of isomers Trade name: DBBT	#N/A	99688-47-8	#N/A	#N/A	#N/A	#N/A	#N/A	#N/A	#N/A	H373 ** H317 H400 H410	#N/A	#N/A	#N/A	#N/A	#N/A	#N/A		0	0	1	0	0	0	0	0	0	0	0	1														1	1
99-99-0	-	-	4-Nitrotoluene	#N/A	#N/A	#N/A	#N/A	#N/A	99-99-0	#N/A	#N/A	#N/A	#N/A	#N/A	#N/A	#N/A	#N/A	#N/A	CAT1		0	0	0	0	0	0	0	0	1	0	0	1														0.3	0.3
NoCAS 004	-	-	PBBs = Brominated Flame retardants = PBB (mixed group of 209 Congeners)	#N/A	#N/A	#N/A	#N/A	#N/A	NoCAS 004	#N/A	#N/A	#N/A	#N/A	#N/A	#N/A	#N/A	#N/A	#N/A	CAT1		0	0	0	0	0	0	0	0	1	0	0	1														0.3	0.3
NoCAS 036	-	-	PCB Aroclor 1016	#N/A	#N/A	#N/A	#N/A	#N/A	NoCAS 036	#N/A	#N/A	#N/A	#N/A	#N/A	#N/A	#N/A	#N/A	#N/A	CAT1		0	0	0	0	0	0	0	0	1	0	0	1														0.3	0.3
NoCAS 037	-	-	PCB 126 (3,3',4,4',5-Pentachlorobiphenyl)	#N/A	#N/A	#N/A	#N/A	#N/A	NoCAS 037	#N/A	#N/A	#N/A	#N/A	#N/A	#N/A	#N/A	#N/A	#N/A	CAT1		0	0	0	0	0	0	0	0	1	0	0	1														0.3	0.3
NoCAS 038	-	-	Mixture of 2,3,4,5-tetrachlorobiphenyl (PCB 61), 2,2',4,5,5'-octachlorobiphenyl (PCB 101) and 2,2',3,3',4,4',5,5'-octachlorobiphenyl (PCB 194)	#N/A	#N/A	#N/A	#N/A	#N/A	NoCAS 038	#N/A	#N/A	#N/A	#N/A	#N/A	#N/A	#N/A	#N/A	#N/A	CAT1		0	0	0	0	0	0	0	0	1	0	0	1														0.3	0.3
NoCAS 039	-	-	PCB 104 (2,2',4,6,6'-Pentachlorobiphenyl)	#N/A	#N/A	#N/A	#N/A	#N/A	NoCAS 039	#N/A	#N/A	#N/A	#N/A	#N/A	#N/A	#N/A	#N/A	#N/A	CAT1		0	0	0	0	0	0	0	0	1	0	0	1														0.3	0.3
NoCAS 040	-	-	4-Hydroxy-3,3',4',5'-tetrachlorobiphenyl	#N/A	#N/A	#N/A	#N/A	#N/A	NoCAS 040	#N/A	#N/A	#N/A	#N/A	#N/A	#N/A	#N/A	#N/A	#N/A	CAT1		0	0	0	0	0	0	0	0	1	0	0	1														0.3	0.3
NoCAS 041	-	-	PCB 105 (2,3,3',4,4' -Pentachlorobiphenyl)	#N/A	#N/A	#N/A	#N/A	#N/A	NoCAS 041	#N/A	#N/A	#N/A	#N/A	#N/A	#N/A	#N/A	#N/A	#N/A	CAT1		0	0	0	0	0	0	0	0	1	0	0	1														0.3	0.3
NoCAS 042	-	-	PCB 122 (2,3,3',4,5 -Pentachlorobiphenyl)	#N/A	#N/A	#N/A	#N/A	#N/A	NoCAS 042	#N/A	#N/A	#N/A	#N/A	#N/A	#N/A	#N/A	#N/A	#N/A	CAT1		0	0	0	0	0	0	0	0	1	0	0	1														0.3	0.3
NoCAS 051	-	-	Triphenyltin	#N/A	#N/A	#N/A	#N/A	#N/A	NoCAS 051	#N/A	#N/A	#N/A	#N/A	#N/A	#N/A	#N/A	#N/A	#N/A	CAT1		0	0	0	0	0	0	0	0	1	0	0	1														0.3	0.3
NoCAS 087	-	-	PCB138 2,2',3,4,4',5'-hexachlorobiphenyl	#N/A	#N/A	#N/A	#N/A	#N/A	NoCAS 087	#N/A	#N/A	#N/A	#N/A	#N/A	#N/A	#N/A	#N/A	#N/A	CAT1		0	0	0	0	0	0	0	0	1	0	0	1														0.3	0.3
NoCAS 088	-	-	PCB180 2,2',3,4,4',5,5'-heptachlorobiphenyl	#N/A	#N/A	#N/A	#N/A	#N/A	NoCAS 088	#N/A	#N/A	#N/A	#N/A	#N/A	#N/A	#N/A	#N/A	#N/A	CAT1		0	0	0	0	0	0	0	0	1	0	0	1														0.3	0.3
NoCAS 092	-	-	PCB 114 (2,3,4,4',5-pentachlorobiphenyl)	#N/A	#N/A	#N/A	#N/A	#N/A	NoCAS 092	#N/A	#N/A	#N/A	#N/A	#N/A	#N/A	#N/A	#N/A	#N/A	CAT1		0	0	0	0	0	0	0	0	1	0	0	1														0.3	0.3
NoCAS 096	-	-	1,1-trichloro-2,2-bis(4-hydroxyphenyl)ethane (HPTE)	#N/A	#N/A	#N/A	#N/A	#N/A	NoCAS 096	#N/A	#N/A	#N/A	#N/A	#N/A	#N/A	#N/A	#N/A	#N/A	CAT1		0	0	0	0	0	0	0	0	1	0	0	1														0.3	0.3
NoCAS 097	-	-	4-OH-2,2',4',5,5'-pentachlorobiphenyl	#N/A	#N/A	#N/A	#N/A	#N/A	NoCAS 097	#N/A	#N/A	#N/A	#N/A	#N/A	#N/A	#N/A	#N/A	#N/A	CAT1		0	0	0	0	0	0	0	0	1	0	0	1														0.3	0.3
NoCAS 100	-	-	Methoxyetylacrylate tinbutyltin, copolymer	#N/A	#N/A	#N/A	#N/A	#N/A	NoCAS 100	#N/A	#N/A	#N/A	#N/A	#N/A	#N/A	#N/A	#N/A	#N/A	CAT1		0	0	0	0	0	0	0	0	1	0	0	1														0.3	0.3
NoCAS 127	-	-	2,4-6-trichlorobiphenyl	#N/A	#N/A	#N/A	#N/A	#N/A	NoCAS 127	#N/A	#N/A	#N/A	#N/A	#N/A	#N/A	#N/A	#N/A	#N/A	CAT1		0	0	0	0	0	0	0	0	1	0	0	1														0.3	0.3
NoCAS 128	-	-	3,4',5-trichlorobiphenyl	#N/A	#N/A	#N/A	#N/A	#N/A	NoCAS 128	#N/A	#N/A	#N/A	#N/A	#N/A	#N/A	#N/A	#N/A	#N/A	CAT1		0	0	0	0	0	0	0	0	1	0	0	1														0.3	0.3
Various1	-	-	reaction mass of 2-ethylhexyl 10-ethyl-4,4-dioctyl-7-oxo-8-oxa-3,5-dithia-4-stannatetradecanoate and 2-ethylhexyl 10-ethyl-4-[[2-[(2-ethylhexyl)oxy]-2-oxoethyl]thio]-4-octyl-7-oxo-8-oxa-3,5-dithia-4-stannatetradecanoate (reaction mass of DOTE and MOTE). [Mixture of CAS# 15571-58-1 & 27107-89-7 // EC# 239-622-4 & 248-227-6]	Various1	#N/A	#N/A	#N/A	#N/A	#N/A	Substance is concluded to be a Reprotoxic substance SVHC by ECHA Member State Committee.	Reprotoxic substance Candidate list	#N/A	#N/A	#N/A	#N/A	#N/A	#N/A	#N/A	#N/A		0	0	0	0	0	0	1	0	0	0	0	1														0.3	0.3
Various2	-	-	5-sec-butyl-2-(2,4-dimethylcyclohex-3-en-1-yl)-5-methyl-1,3-dioxane [1], 5-sec-butyl-2-(4,6-dimethylcyclohex-3-en-1-yl)-5-methyl-1,3-dioxane [2] [covering any of the individual stereoisomers of [1] and [2] or any combination thereof, including CAS#: 117933-89-8, 186309-28-4, 343934-04-3, 343934-05-4, 676367-02-5, 676367-03-6, 676367-04-7, 676367-05-8, 676367-06-9, 676367-07-0, 676367-08-1, 676367…	Various2	#N/A	#N/A	#N/A	#N/A	#N/A	Substance is concluded to be a vPvB SVHC by ECHA Member State Committee.	vPvB candidate list	#N/A	#N/A	#N/A	#N/A	#N/A	#N/A	#N/A	#N/A		0	1	0	0	0	0	0	0	0	0	0	1														0.3	0.3
67-51-6	200-657-5	200-657-5	3,5-dimethylpyrazole	#N/A	#N/A	#N/A	#N/A	200-657-5	#REF!	#N/A	#N/A	#N/A	#N/A	#N/A	#N/A	#N/A	#N/A	Reprotoxic#High RCR	#N/A		0	0	0	0	0	0	1	0	0	0	0	1														0.5	0.5
75-35-4	200-864-0	200-864-0	1,1-Dichloroethene	#N/A	200-864-0	#N/A	#N/A	#N/A	#REF!	#N/A	#N/A	#N/A	H224 H351 H332	#N/A	#N/A	#N/A	#N/A	#N/A	#N/A		0	0	0	0	1	0	0	0	0	0	0	1														1	1
76-05-1	-	200-929-3	TFA (Trifluoracetat)	200-929-3	#N/A	#N/A	#N/A	#N/A	#REF!	This substance is Persistent, Mobile and Toxic.	Skin Corr. 1A_x000D_ Acute Tox. 4_x000D_ Aquatic Chronic 3	H314_x000D_ H332_x000D_ H412	#N/A	#N/A	#N/A	#N/A	#N/A	#N/A	#N/A		0	0	1	0	0	0	0	0	0	0	0	1														0.3	0.3
78-67-1	-	201-132-3	2,2'-dimethyl-2,2'-azodipropiononitrile (APN)	201-132-3	#N/A	#N/A	#N/A	#N/A	#REF!	This substance is Persistent, Mobile and Toxic. Detected in natural waters.	Acute Tox. 4_x000D_ Aquatic Chronic 3	H242_x000D_ H302_x000D_ H332_x000D_ H412	#N/A	#N/A	#N/A	#N/A	#N/A	#N/A	#N/A		0	0	1	0	0	0	0	0	0	0	0	1														0.3	0.3
79-00-5	201-166-9	201-166-9	1,1,2-Trichloroethane	#N/A	201-166-9	#N/A	#N/A	#N/A	#REF!	#N/A	#N/A	#N/A	H351 H332 H312 H302	#N/A	#N/A	#N/A	#N/A	#N/A	#N/A		0	0	0	0	1	0	0	0	0	0	0	1														1	1
79-34-5	201-197-8	201-197-8	1,1,2,2-Tetrachloroethane	#N/A	201-197-8	#N/A	#N/A	#N/A	#REF!	#N/A	#N/A	#N/A	H310 H330 H411	#N/A	#N/A	#N/A	#N/A	#N/A	#N/A		0	0	1	0	0	0	0	0	0	0	0	1														1	1
85-01-8	-	201-581-5	Phenanthrene	#N/A	#N/A	201-581-5	#N/A	#N/A	#REF!	#N/A	#N/A	#N/A	#N/A	#N/A	vPvB (Article 57e)	#N/A	#N/A	#N/A	#N/A		0	1	0	0	0	0	0	0	0	0	0	1														1	1
85-42-7	201-604-9	201-604-9	Cyclohexane-1,2-dicarboxylic anhydride [1], cis-cyclohexane-1,2-dicarboxylic anhydride [2], trans-cyclohexane-1,2-dicarboxylic anhydride [3] <i>[The individual cis- [2] and trans- [3] isomer substances and all possible combinations of the cis- and trans-isomers [1] are covered by this entry]</i>	201-604-9	#N/A	201-604-9	#N/A	#N/A	#REF!	Classified respiratory sensitizer concluded to be a SVHC by ECHA Member State Committee.	Skin Sens. 1; Eye Dam. 1; Resp. Sens. 1	H317; H318; H334	#N/A	H318 H334 H317	Respiratory sensitising properties (Article 57(f) - human health)	#N/A	#N/A	#N/A	#N/A		0	0	0	0	0	0	0	1	0	0	0	1														1	1
107-15-3	203-468-6	203-468-6	Ethylenediamine	203-468-6	#N/A	203-468-6	#N/A	#N/A	#REF!	Classified respiratory sensitizer concluded to be a SVHC by ECHA Member State Committee	Flam. Liq. 3_x000D_ Acute Tox. 4 *_x000D_ Resp. Sens. 1_x000D_ Skin Corr. 1B_x000D_ Skin Sens. 1_x000D_	H226_x000D_ H302_x000D_ H314_x000D_ H334_x000D_ H317_x000D_ H312	#N/A	H226 H312 H302 H314 H334 H317	Respiratory sensitising properties (Article 57(f) - human health)	#N/A	#N/A	#N/A	#N/A		0	0	0	0	0	0	0	1	0	0	0	1														1	1
108-46-3	203-585-2	203-585-2	Resorcinol	#N/A	#N/A	#N/A	#N/A	203-585-2	#REF!	#N/A	#N/A	#N/A	#N/A	#N/A	#N/A	#N/A	H302 H315 H319 H400	Potential endocrine disruptor#Consumer use#High (aggregated) tonnage#Wide dispersive use	CAT1		0	0	0	0	0	0	0	0	1	0	0	1														0.5	0.5
108-91-8	203-629-0	203-629-0	Cyclohexylamine	#N/A	#N/A	#N/A	#N/A	203-629-0	#REF!	#N/A	#N/A	#N/A	#N/A	#N/A	#N/A	#N/A	H226 H361f *** H312 H302 H314	Reprotoxic#Exposure of environment#High (aggregated) tonnage	#N/A		0	0	0	0	0	0	1	0	0	0	0	1														0.5	0.5
110-82-7	203-806-2	203-806-2	Cyclohexane	#N/A	203-806-2	#N/A	#N/A	#N/A	#REF!	#N/A	#N/A	#N/A	H225 H304 H336 H315 H400 H410	#N/A	#N/A	#N/A	#N/A	#N/A	#N/A		0	0	1	0	0	0	0	0	0	0	0	1														1	1
111-77-3	203-906-6	203-906-6	2-(2-methoxyethoxy)ethanol (DEGME)	#N/A	203-906-6	#N/A	#N/A	#N/A	#REF!	#N/A	#N/A	#N/A	H361d ***	#N/A	#N/A	#N/A	#N/A	#N/A	#N/A		0	0	0	0	0	0	1	0	0	0	0	1														1	1
120-47-8	204-399-4	204-399-4	Ethyl 4-hydroxybenzoate	#N/A	#N/A	#N/A	#N/A	204-399-4	#REF!	#N/A	#N/A	#N/A	#N/A	#N/A	#N/A	#N/A	#N/A	Potential endocrine disruptor	CAT1		0	0	0	0	0	0	0	0	1	0	0	1														0.5	0.5
123-77-3	204-650-8	204-650-8	Diazene-1,2-dicarboxamide (C,C'-azodi(formamide))	204-650-8	#N/A	204-650-8	#N/A	#N/A	#REF!	Classified respiratory sensitizer concluded to be a SVHC by ECHA Member State Committee.	Resp. Sens. 1	H334	#N/A	H334	Respiratory sensitising properties (Article 57(f) - human health)	#N/A	#N/A	#N/A	#N/A		0	0	0	0	0	0	0	1	0	0	0	1														1	1
123-91-1	-	204-661-8	1,4-dioxane	204-661-8	#N/A	#N/A	#N/A	#N/A	#REF!	This substance is Persistent, Mobile and Toxic. Detected in natural waters.	Flam. Liq. 2_x000D_ Eye Irrit. 2 _x000D_ STOT SE 3 _x000D_ Carc. 2	H225_x000D_ H319 _x000D_ H335_x000D_ H351	#N/A	#N/A	#N/A	#N/A	#N/A	#N/A	#N/A		0	0	0	0	1	0	0	0	0	0	0	1														0.3	0.3
128-37-0	204-881-4	204-881-4	Butylated Hydroxytoluene	204-881-4	#N/A	#N/A	#N/A	204-881-4	#REF!	This substance has endocrine disrupting properties. In vivo studies of Butylated Hydroxytoluene has shown that the substance disrupts thyroid gland function and morphology. Reduced fertility, altered growth and development, impaired learning and motor beh	Official classification missing	#N/A	#N/A	#N/A	#N/A	#N/A	#N/A	Potential endocrine disruptor#Exposure of sensitive populations#Exposure of workers#High (aggregated) tonnage#Wide dispersive use	#N/A		0	0	0	0	0	0	0	0	1	0	0	1														0.5	0.5
307-55-1	206-203-2	206-203-2	Tricosafluorododecanoic acid	206-203-2	#N/A	206-203-2	#N/A	#N/A	#REF!	Substance is concluded to be a vPvB SVHC by ECHA Member State Committee.	vPvB	vPvB	#N/A	#N/A	vPvB (Article 57e)	#N/A	#N/A	#N/A	#N/A		0	1	0	0	0	0	0	0	0	0	0	1														1	1
376-06-7	206-803-4	206-803-4	Heptacosafluorotetradecanoic acid	206-803-4	#N/A	206-803-4	#N/A	#N/A	#REF!	Substance is concluded to be a vPvB SVHC by ECHA Member State Committee.	vPvB	vPvB	#N/A	#N/A	vPvB (Article 57e)	#N/A	#N/A	#N/A	#N/A		0	1	0	0	0	0	0	0	0	0	0	1														1	1
552-30-7	209-008-0	209-008-0	Benzene-1,2,4-tricarboxylic acid 1,2 anhydride	209-008-0	#N/A	209-008-0	#N/A	#N/A	#REF!	Classified respiratory sensitizer concluded to be a SVHC by ECHA Member State Committee	STOT SE 3_x000D_ Eye Dam. 1_x000D_ Skin Sens. 1_x000D_ Resp. Sens. 1	H318_x000D_ H317_x000D_ H335_x000D_ H334	#N/A	H335 H318 H334 H317	Respiratory sensitising properties (Article 57(f) - human health)	#N/A	#N/A	#N/A	#N/A		0	0	0	0	0	0	0	1	0	0	0	1														1	1
1332-77-0	215-575-5	215-575-5	dipotassium tetraborate	#N/A	#N/A	#N/A	#N/A	215-575-5	#REF!	#N/A	#N/A	#N/A	#N/A	#N/A	#N/A	#N/A	#N/A	Reprotoxic#Consumer use#Exposure of workers#High RCR#Wide dispersive use	#N/A		0	0	0	0	0	0	1	0	0	0	0	1														0.5	0.5
1634-04-4	216-653-1	216-653-1	tert-butyl methyl ether; MTBE; 2-methoxy-2-methylpropane	216-653-1	#N/A	#N/A	#N/A	216-653-1	#REF!	MTBE is an endocrine disruptor with androgen and thyroid activity, affecting several body functions including reproduction and immune function. The substance has been found in biomonitoring studies. It is categorized as an endocrine disruptor in the EU Co	Flam. Liq. 2 Skin Irrit. 2	H225 H315	#N/A	#N/A	#N/A	#N/A	H225 H315	Potential endocrine disruptor#High (aggregated) tonnage#Wide dispersive use	CAT1		0	0	0	0	0	0	0	0	1	0	0	1														0.5	0.5
1987-50-4	217-862-0	217-862-0	p-n-heptylphenol 4-heptylphenol phenol, 4-heptyl- phenol, p-heptyl-	217-862-0	#N/A	#N/A	#N/A	#N/A	#REF!	Substance is concluded to be an endocrine disruptor SVHC by ECHA Member State Committee.	Official classification missing - 57f substance	#N/A	#N/A	#N/A	#N/A	#N/A	#N/A	#N/A	#N/A		0	0	0	0	0	0	0	1	0	0	0	1														0.3	0.3
2058-94-8	218-165-4	218-165-4	Henicosafluoroundecanoic acid	218-165-4	#N/A	218-165-4	#N/A	#N/A	#REF!	Substance is concluded to be a vPvB SVHC by ECHA Member State Committee.	vPvB	vPvB	#N/A	#N/A	vPvB (Article 57e)	#N/A	#N/A	#N/A	#N/A		0	1	0	0	0	0	0	0	0	0	0	1														1	1
2062-98-8	-	218-173-8	2,3,3,3-tetrafluoro-2-(heptafluoropropoxy)propionyl fluoride	218-173-8	#N/A	218-173-8	#N/A	#N/A	#REF!	Substance is concluded to be a substance of equivalent level of concern (57f) SVHC by ECHA Member State Committee due to its persistence, mobility, potential for long-range transport and observed adverse effects.	0	#N/A	#N/A	#N/A	Equivalent level of concern having probable serious effects to human health (Article 57(f) - human health)#Equivalent level of concern having probable serious effects to the environment (Article 57(f) - environment)	#N/A	#N/A	#N/A	#N/A		0	0	0	0	0	0	0	1	0	0	0	1														1	1
2536-05-2	219-799-4	219-799-4	2,2’-Methylenediphenyl diisocyanate	#N/A	219-799-4	#N/A	#N/A	#N/A	#REF!	#N/A	#N/A	#N/A	H351 H332 H335 H373 ** H315 H319 H334 H317	#N/A	#N/A	#N/A	#N/A	#N/A	#N/A		0	0	0	0	1	0	0	0	0	0	0	1														1	1
3864-99-1	223-383-8	223-383-8	UV-327	223-383-8	#N/A	223-383-8	223-383-8	#N/A	#REF!	Substance is concluded to be a vPvB SVHC by ECHA Member State Committee.	vPvB cand list.	#N/A	#N/A	#N/A	vPvB (Article 57e)	#N/A	#N/A	#N/A	#N/A		0	1	0	0	0	0	0	0	0	0	0	1														1	1
5466-77-3/83834-59-7	226-775-7	226-775-7	2-ethylhexyl 4-methoxycinnamate	226-775-7	#N/A	#N/A	#N/A	#N/A	#REF!	Substance is an endocrine disruptor with estrogenic and thyroid activity, affecting several body functions including development, brain and metabolism. The substance has been found in biomonitoring studies and in human milk. It is categorized as an endocrine disruptor in the EU Commission EDC database.	Official classification missing - 57f substance	#N/A	#N/A	#N/A	#N/A	#N/A	#N/A	#N/A	#N/A		0	0	0	0	0	0	0	1	0	0	0	1														0.3	0.3
5873-54-1	227-534-9	227-534-9	2,4’-Methylenediphenyl diisocyanate	#N/A	227-534-9	#N/A	#N/A	#N/A	#REF!	#N/A	#N/A	#N/A	H351 H332 H335 H373 ** H315 H319 H334 H317	#N/A	#N/A	#N/A	#N/A	#N/A	#N/A		0	0	0	0	1	0	0	0	0	0	0	1														1	1
7778-39-4	231-901-9	231-901-9	Arsenic acid	#N/A	#N/A	231-901-9	231-901-9	#N/A	#REF!	#N/A	#N/A	#N/A	#N/A	#N/A	Carcinogenic (Article 57a)	#N/A	#N/A	#N/A	#N/A		0	0	0	0	1	0	0	0	0	0	0	1														1	1
7779-90-0	231-944-3	231-944-3	Trizinc bis(orthophosphate)	#N/A	#N/A	#N/A	#N/A	231-944-3	#REF!	#N/A	#N/A	#N/A	#N/A	#N/A	#N/A	#N/A	H400 H410	High (aggregated) tonnage#Wide dispersive use	#N/A		0	0	1	0	0	0	0	0	0	0	0	1														0.5	0.5
8001-58-9	232-287-5	232-287-5	Creosote; wash oil	#N/A	232-287-5	#N/A	#N/A	#N/A	#REF!	#N/A	#N/A	#N/A	H350	#N/A	#N/A	#N/A	#N/A	#N/A	#N/A		0	0	0	0	1	0	0	0	0	0	0	1														1	1
12008-41-2	234-541-0	234-541-0	Disodium octaborate	#N/A	#N/A	234-541-0	#N/A	#N/A	#REF!	#N/A	#N/A	#N/A	#N/A	H360FD	Toxic for reproduction (Article 57c)	#N/A	#N/A	#N/A	#N/A		0	0	0	0	0	0	1	0	0	0	0	1														1	1
12122-67-7	235-180-1	235-180-1	Zineb	235-180-1	#N/A	#N/A	#N/A	#N/A	#REF!	#N/A	STOT SE 3 Skin Sens. 1	H335 H317	#N/A	#N/A	#N/A	#N/A	#N/A	#N/A	CAT1		0	0	0	0	0	0	0	0	1	0	0	1														0.3	0.3
12578-12-0	235-702-8	235-702-8	Dioxobis(stearato)trilead	#N/A	#N/A	235-702-8	#N/A	#N/A	#REF!	#N/A	#N/A	#N/A	#N/A	#N/A	Toxic for reproduction (Article 57c)	#N/A	#N/A	#N/A	#N/A		0	0	0	0	0	0	1	0	0	0	0	1														1	1
13149-00-3	236-086-3	236-086-3	Cyclohexane-1,2-dicarboxylic anhydride [1], cis-cyclohexane-1,2-dicarboxylic anhydride [2], trans-cyclohexane-1,2-dicarboxylic anhydride [3] <i>[The individual cis- [2] and trans- [3] isomer substances and all possible combinations of the cis- and trans-isomers [1] are covered by this entry]</i>	236-086-3	#N/A	236-086-3	#N/A	#N/A	#REF!	Classified respiratory sensitizer concluded to be a SVHC by ECHA Member State Committee.	Skin Sens. 1; Eye Dam. 1; Resp. Sens. 1	H317; H318; H334	#N/A	H318 H334 H317	Respiratory sensitising properties (Article 57(f) - human health)	#N/A	#N/A	#N/A	#N/A		0	0	0	0	0	0	0	1	0	0	0	1														1	1
13252-13-6	-	236-236-8	2,3,3,3-tetrafluoro-2-(heptafluoropropoxy)propionic acid	236-236-8	#N/A	236-236-8	#N/A	#N/A	#REF!	Substance is concluded to be a substance of equivalent level of concern (57f) SVHC by ECHA Member State Committee due to its persistence, mobility, potential for long-range transport and observed adverse effects.	0	#N/A	#N/A	#N/A	Equivalent level of concern having probable serious effects to human health (Article 57(f) - human health)#Equivalent level of concern having probable serious effects to the environment (Article 57(f) - environment)	#N/A	#N/A	#N/A	#N/A		0	0	0	0	0	0	0	1	0	0	0	1														1	1
13252-13-6 / 75579-39-4 / 75579-40-7	-	236-236-8	Propanoic acid, 2,3,3,3-tetrafluoro-2-(1,1,2,2,3,3,3-heptafluoropropoxy)-	236-236-8	#N/A	236-236-8	#N/A	#N/A	#REF!	Substance is concluded to be a substance of equivalent level of concern (57f) SVHC by ECHA Member State Committee due to its persistence, mobility, potential for long-range transport and observed adverse effects.	0	#N/A	#N/A	#N/A	Equivalent level of concern having probable serious effects to human health (Article 57(f) - human health)#Equivalent level of concern having probable serious effects to the environment (Article 57(f) - environment)	#N/A	#N/A	#N/A	#N/A		0	0	0	0	0	0	0	1	0	0	0	1														1	1
14166-21-3	238-009-9	238-009-9	Cyclohexane-1,2-dicarboxylic anhydride [1], cis-cyclohexane-1,2-dicarboxylic anhydride [2], trans-cyclohexane-1,2-dicarboxylic anhydride [3] <i>[The individual cis- [2] and trans- [3] isomer substances and all possible combinations of the cis- and trans-isomers [1] are covered by this entry]</i>	238-009-9	#N/A	238-009-9	#N/A	#N/A	#REF!	Classified respiratory sensitizer concluded to be a SVHC by ECHA Member State Committee.	Skin Sens. 1; Eye Dam. 1; Resp. Sens. 1	H317; H318; H334	#N/A	H318 H334 H317	Respiratory sensitising properties (Article 57(f) - human health)	#N/A	#N/A	#N/A	#N/A		0	0	0	0	0	0	0	1	0	0	0	1														1	1
15571-58-1	239-622-4	239-622-4	2-ethylhexyl 10-ethyl-4,4-dioctyl-7-oxo-8-oxa-3,5-dithia-4-stannatetradecanoate (DOTE)	#N/A	#N/A	239-622-4	#N/A	#N/A	#REF!	#N/A	#N/A	#N/A	#N/A	H360D	Toxic for reproduction (Article 57c)	#N/A	#N/A	#N/A	#N/A		0	0	0	0	0	0	1	0	0	0	0	1														1	1
17404-66-9	241-427-4	241-427-4	p-(1-methyloctyl)phenol	241-427-4	#N/A	#N/A	#N/A	#N/A	#REF!	Nonylphenol is an endocrine disruptor (cat 1) and is classified as possibly toxic for reproduction (R3), It is also persistent and bio-accumulative and it has been found in humans and the environment.	Official classification missing - 57f substance	#N/A	#N/A	#N/A	#N/A	#N/A	#N/A	#N/A	#N/A		0	0	0	0	0	0	0	1	0	0	0	1														0.3	0.3
19438-60-9	243-072-0	243-072-0	Hexahydromethylphthalic anhydride [1], Hexahydro-4-methylphthalic anhydride [2], Hexahydro-1-methylphthalic anhydride [3], Hexahydro-3-methylphthalic anhydride [4] <i>[The individual isomers [2], [3] and [4] (including their cis- and trans- stereo isomeric forms) and all possible combinations of the isomers [1] are covered by this entry]</i>	243-072-0	#N/A	243-072-0	#N/A	#N/A	#REF!	Classified respiratory sensitizer concluded to be a SVHC by ECHA Member State Committee.	Respiratory sensitizer Candidate list	#N/A	#N/A	H318 H334 H317	Respiratory sensitising properties (Article 57(f) - human health)	#N/A	#N/A	#N/A	#N/A		0	0	0	0	0	0	0	1	0	0	0	1														1	1
25550-51-0	247-094-1	247-094-1	Hexahydromethylphthalic anhydride [1], Hexahydro-4-methylphthalic anhydride [2], Hexahydro-1-methylphthalic anhydride [3], Hexahydro-3-methylphthalic anhydride [4] <i>[The individual isomers [2], [3] and [4] (including their cis- and trans- stereo isomeric forms) and all possible combinations of the isomers [1] are covered by this entry]</i>	247-094-1	#N/A	247-094-1	#N/A	#N/A	#REF!	Classified respiratory sensitizer concluded to be a SVHC by ECHA Member State Committee.	Skin Sens. 1; Eye Dam. 1; Resp. Sens. 1	H317; H318; H334	#N/A	H318 H334 H317	Respiratory sensitising properties (Article 57(f) - human health)	#N/A	#N/A	#N/A	#N/A		0	0	0	0	0	0	0	1	0	0	0	1														1	1
26447-40-5	247-714-0	247-714-0	Methylenediphenyl diisocyanate (MDI)	#N/A	247-714-0	#N/A	#N/A	#N/A	#REF!	#N/A	#N/A	#N/A	H351 H332 H335 H373 ** H315 H319 H334 H317	#N/A	#N/A	#N/A	#N/A	#N/A	#N/A		0	0	0	0	1	0	0	0	0	0	0	1														1	1
26543-97-5	247-770-6	247-770-6	p-isononylphenol	247-770-6	#N/A	#N/A	#N/A	#N/A	#REF!	Nonylphenol is an endocrine disruptor (cat 1) and is classified as possibly toxic for reproduction (R3), It is also persistent and bio-accumulative and it has been found in humans and the environment.	Official classification missing - 57f substance	#N/A	#N/A	#N/A	#N/A	#N/A	#N/A	#N/A	#N/A		0	0	0	0	0	0	0	1	0	0	0	1														0.3	0.3
30784-30-6	250-339-5	250-339-5	p-(1,1-dimethylheptyl)phenol	250-339-5	#N/A	#N/A	#N/A	#N/A	#REF!	Nonylphenol is an endocrine disruptor (cat 1) and is classified as possibly toxic for reproduction (R3), It is also persistent and bio-accumulative and it has been found in humans and the environment.	Official classification missing - 57f substance	#N/A	#N/A	#N/A	#N/A	#N/A	#N/A	#N/A	#N/A		0	0	0	0	0	0	0	1	0	0	0	1														0.3	0.3
36437-37-3	253-037-1	253-037-1	UV-350	253-037-1	#N/A	253-037-1	253-037-1	#N/A	#REF!	Substance is concluded to be a vPvB SVHC by ECHA Member State Committee.	vPvB Candidate List.	#N/A	#N/A	#N/A	vPvB (Article 57e)	#N/A	#N/A	#N/A	#N/A		0	1	0	0	0	0	0	0	0	0	0	1														1	1
48122-14-1	256-356-4	256-356-4	Hexahydromethylphthalic anhydride [1], Hexahydro-4-methylphthalic anhydride [2], Hexahydro-1-methylphthalic anhydride [3], Hexahydro-3-methylphthalic anhydride [4] <i>[The individual isomers [2], [3] and [4] (including their cis- and trans- stereo isomeric forms) and all possible combinations of the isomers [1] are covered by this entry]</i>	256-356-4	#N/A	256-356-4	#N/A	#N/A	#REF!	Classified respiratory sensitizer concluded to be a SVHC by ECHA Member State Committee.	Skin Sens. 1; Eye Dam. 1; Resp. Sens. 1	H317; H318; H334	#N/A	H318 H334 H317	Respiratory sensitising properties (Article 57(f) - human health)	#N/A	#N/A	#N/A	#N/A		0	0	0	0	0	0	0	1	0	0	0	1														1	1
49663-84-5	256-418-0	256-418-0	Pentazinc chromate octahydroxide	#N/A	#N/A	256-418-0	#N/A	#N/A	#REF!	#N/A	#N/A	#N/A	#N/A	#N/A	Carcinogenic (Article 57a)	#N/A	#N/A	#N/A	#N/A		0	0	0	0	1	0	0	0	0	0	0	1														1	1
51404-69-4	257-175-3	257-175-3	Acetic acid, lead salt, basic	#N/A	#N/A	257-175-3	#N/A	#N/A	#REF!	#N/A	#N/A	#N/A	#N/A	#N/A	Toxic for reproduction (Article 57c)	#N/A	#N/A	#N/A	#N/A		0	0	0	0	0	0	1	0	0	0	0	1														1	1
52427-13-1	257-907-1	257-907-1	4-(1-ethyl-1-methylhexyl)phenol	257-907-1	#N/A	#N/A	#N/A	#N/A	#REF!	Nonylphenol is an endocrine disruptor (cat 1) and is classified as possibly toxic for reproduction (R3), It is also persistent and bio-accumulative and it has been found in humans and the environment.	Official classification missing - 57f substance	#N/A	#N/A	#N/A	#N/A	#N/A	#N/A	#N/A	#N/A		0	0	0	0	0	0	0	1	0	0	0	1														0.3	0.3
57110-29-9	260-566-1	260-566-1	Hexahydromethylphthalic anhydride [1], Hexahydro-4-methylphthalic anhydride [2], Hexahydro-1-methylphthalic anhydride [3], Hexahydro-3-methylphthalic anhydride [4] <i>[The individual isomers [2], [3] and [4] (including their cis- and trans- stereo isomeric forms) and all possible combinations of the isomers [1] are covered by this entry]</i>	260-566-1	#N/A	260-566-1	#N/A	#N/A	#REF!	Classified respiratory sensitizer concluded to be a SVHC by ECHA Member State Committee.	Skin Sens. 1; Eye Dam. 1; Resp. Sens. 1	H317; H318; H334	#N/A	H318 H334 H317	Respiratory sensitising properties (Article 57(f) - human health)	#N/A	#N/A	#N/A	#N/A		0	0	0	0	0	0	0	1	0	0	0	1														1	1
61788-32-7	262-967-7	262-967-7	Terphenyl, hydrogenated	262-967-7	#N/A	262-967-7	#N/A	#N/A	#REF!	Substance is concluded to be a vPvB SVHC by ECHA Member State Committee.	0	#N/A	#N/A	#N/A	vPvB (Article 57e)	#N/A	#N/A	#N/A	#N/A		0	1	0	0	0	0	0	0	0	0	0	1														1	1
61789-28-4	263-047-8	263-047-8	Creosote oil; wash oil	#N/A	263-047-8	#N/A	#N/A	#N/A	#REF!	#N/A	#N/A	#N/A	H350	#N/A	#N/A	#N/A	#N/A	#N/A	#N/A		0	0	0	0	1	0	0	0	0	0	0	1														1	1
[truncated: 316 more rows]
[truncated: 2 more columns]

## Sheet: After filter 2
CASNumber	EC Number	Name	PBT	Total environment/health	Quantities points (Total Use SPIN)
26471-62-5	247-722-4	m-tolylidene diisocyanate	0.7	6	6
[truncated: 52 more rows]

## Sheet: After Filter 4 
Name	CAS#	EC#	PBT	Total points	Total points	Total points	Total points	Total points
[truncated: 24 more rows]

[truncated: 13 more sheets: After filter 5, sin-list 180320_update, REACH XVII_update,  REACH 59_update, REACH XIV_update, CoRAP_update, EDC_update, Exposure, Total Use SPIN, Data sources for monitoring, Summary Monitoring, Monitoring all data, Collected]
